# Supplementary material for: Synthesis, Structural and Physicochemical Characterization of a Titanium(IV) Compound with the Hydroxamate Ligand N,2-Dihydroxybenzamide
Source: MDPI journal article supplement (doi:10.3390/molecules26185588), 2021-09-15

# checkCIF/PLATON report

Structure factors have been supplied for datablock(s) shelx

THIS REPORT IS FOR GUIDANCE ONLY. IF USED AS PART OF A REVIEW PROCEDURE FOR PUBLICATION, IT SHOULD NOT REPLACE THE EXPERTISE OF AN EXPERIENCED CRYSTALLOGRAPHIC REFEREE.

No syntax errors found.      CIF dictionary      Interpreting this report

## Datablock: shelx

---

Bond precision:    C-C = 0.0073 Å                      Wavelength=0.71073

Cell:                      a=20.040(4)              b=26.118(5)              c=36.745(11)  
                            alpha=90              beta=90              gamma=90  
Temperature:              150 K

|                        | Calculated                             | Reported              |
|------------------------|----------------------------------------|-----------------------|
| Volume                 | 19233(8)                               | 19232(8)              |
| Space group            | F d d d                                | F d d d               |
| Hall group             | : -F 2uv 2v                            | -F 2uv 2v             |
|                        | C32 H34 K2 N4 O17 Ti2, C               |                       |
| Moiety formula         | H3 O, C O2, 2(C0.50 O0.50), 2(C0.50 O0 | C36 H37 K2 N4 O22 Ti2 |
| Sum formula            | C36 H37 K2 N4 O22 Ti2                  | C36 H37 K2 N4 O22 Ti2 |
| Mr                     | 1051.64                                | 1051.69               |
| Dx, g cm <sup>-3</sup> | 1.453                                  | 1.453                 |
| Z                      | 16                                     | 16                    |
| Mu (mm <sup>-1</sup> ) | 0.587                                  | 0.587                 |
| F000                   | 8624.0                                 | 8624.0                |
| F000'                  | 8644.21                                |                       |
| h,k,lmax               | 25,32,46                               | 25,32,45              |
| Nref                   | 5004                                   | 4976                  |
| Tmin,Tmax              | 0.889,0.943                            | 0.658,0.745           |
| Tmin'                  | 0.889                                  |                       |

Correction method= # Reported T Limits: Tmin=0.658 Tmax=0.745  
AbsCorr = EMPIRICAL

Data completeness= 0.994                      Theta(max)= 26.515

R(reflections)= 0.0718( 3261)              wR2(reflections)= 0.2215( 4976)

S = 1.052                      Npar= 304

---

The following ALERTS were generated. Each ALERT has the format

**test-name\_ALERT\_alert-type\_alert-level.**

Click on the hyperlinks for more details of the test.

### Alert level B

|                   |                                                  |     |                  |   |              |
|-------------------|--------------------------------------------------|-----|------------------|---|--------------|
| PLAT413_ALERT_2_B | Short Inter XH3 .. XHn                           | H3  | ..H97C           | . | 1.97 Ang.    |
|                   |                                                  |     | x,y,z =          |   | 1_555 Check  |
| PLAT430_ALERT_2_B | Short Inter D...A Contact                        | O12 | ..O98B           | . | 2.61 Ang.    |
|                   |                                                  |     | x,y,z =          |   | 1_555 Check  |
| PLAT430_ALERT_2_B | Short Inter D...A Contact                        | O17 | ..O98A           | . | 2.72 Ang.    |
|                   |                                                  |     | 1/2-x,-y,3/2-z = |   | 25_556 Check |
| PLAT430_ALERT_2_B | Short Inter D...A Contact                        | O17 | ..O98B           | . | 2.74 Ang.    |
|                   |                                                  |     | 1/2-x,-y,3/2-z = |   | 25_556 Check |
| PLAT780_ALERT_1_B | Coordinates do not Form a Properly Connected Set |     |                  |   | Please Do !  |

### Alert level C

|                   |                                                  |       |         |        |  |
|-------------------|--------------------------------------------------|-------|---------|--------|--|
| RINTA01_ALERT_3_C | The value of Rint is greater than 0.12           |       |         |        |  |
|                   | Rint given                                       | 0.123 |         |        |  |
| PLAT020_ALERT_3_C | The Value of Rint is Greater Than 0.12           | ..... | 0.123   | Report |  |
| PLAT260_ALERT_2_C | Large Average Ueq of Residue Including           | O97   | 0.123   | Check  |  |
| PLAT309_ALERT_2_C | Single Bonded Oxygen (C-O > 1.3 Ang)             | ..... | O97     | Check  |  |
| PLAT309_ALERT_2_C | Single Bonded Oxygen (C-O > 1.3 Ang)             | ..... | O17     | Check  |  |
| PLAT309_ALERT_2_C | Single Bonded Oxygen (C-O > 1.3 Ang)             | ..... | O98A    | Check  |  |
| PLAT309_ALERT_2_C | Single Bonded Oxygen (C-O > 1.3 Ang)             | ..... | O98B    | Check  |  |
| PLAT341_ALERT_3_C | Low Bond Precision on C-C Bonds                  | ..... | 0.00729 | Ang.   |  |
| PLAT906_ALERT_3_C | Large K Value in the Analysis of Variance        | ..... | 2.122   | Check  |  |
| PLAT978_ALERT_2_C | Number C-C Bonds with Positive Residual Density. |       | 0       | Info   |  |

### Alert level G

|                   |                                                  |                      |        |        |  |
|-------------------|--------------------------------------------------|----------------------|--------|--------|--|
| PLAT002_ALERT_2_G | Number of Distance or Angle Restraints on AtSite |                      | 7      | Note   |  |
| PLAT004_ALERT_5_G | Polymeric Structure Found with Maximum Dimension |                      | 3      | Info   |  |
| PLAT007_ALERT_5_G | Number of Unrefined Donor-H Atoms                | .....                | 3      | Report |  |
| PLAT042_ALERT_1_G | Calc. and Reported MoietyFormula Strings Differ  |                      | Please | Check  |  |
| PLAT083_ALERT_2_G | SHELXL Second Parameter in WGHT Unusually Large  |                      | 231.38 | Why ?  |  |
| PLAT172_ALERT_4_G | The CIF-Embedded .res File Contains DFIX Records |                      | 5      | Report |  |
| PLAT300_ALERT_4_G | Atom Site Occupancy of C97                       | Constrained at       | 0.5    | Check  |  |
| PLAT300_ALERT_4_G | Atom Site Occupancy of H97A                      | Constrained at       | 0.5    | Check  |  |
| PLAT300_ALERT_4_G | Atom Site Occupancy of H97B                      | Constrained at       | 0.5    | Check  |  |
| PLAT300_ALERT_4_G | Atom Site Occupancy of H97C                      | Constrained at       | 0.5    | Check  |  |
| PLAT300_ALERT_4_G | Atom Site Occupancy of C17B                      | Constrained at       | 0.5    | Check  |  |
| PLAT300_ALERT_4_G | Atom Site Occupancy of O98A                      | Constrained at       | 0.5    | Check  |  |
| PLAT300_ALERT_4_G | Atom Site Occupancy of C98A                      | Constrained at       | 0.5    | Check  |  |
| PLAT300_ALERT_4_G | Atom Site Occupancy of O98B                      | Constrained at       | 0.5    | Check  |  |
| PLAT300_ALERT_4_G | Atom Site Occupancy of C98B                      | Constrained at       | 0.5    | Check  |  |
| PLAT302_ALERT_4_G | Anion/Solvent/Minor-Residue Disorder (Resd 2 )   |                      | 50%    | Note   |  |
| PLAT302_ALERT_4_G | Anion/Solvent/Minor-Residue Disorder (Resd 3 )   |                      | 33%    | Note   |  |
| PLAT302_ALERT_4_G | Anion/Solvent/Minor-Residue Disorder (Resd 4 )   |                      | 100%   | Note   |  |
| PLAT302_ALERT_4_G | Anion/Solvent/Minor-Residue Disorder (Resd 5 )   |                      | 100%   | Note   |  |
| PLAT432_ALERT_2_G | Short Inter X...Y Contact                        | O17 ..C97            | 2.90   | Ang.   |  |
|                   |                                                  | -1/2+x,1/4-y,7/4-z = | 11_456 | Check  |  |
| PLAT432_ALERT_2_G | Short Inter X...Y Contact                        | O98A ..C98B          | 2.00   | Ang.   |  |
|                   |                                                  | 1/2-x,-y,3/2-z =     | 25_556 | Check  |  |
| PLAT432_ALERT_2_G | Short Inter X...Y Contact                        | O98A ..C17B          | 2.06   | Ang.   |  |
|                   |                                                  | 1/2-x,-y,3/2-z =     | 25_556 | Check  |  |
| PLAT432_ALERT_2_G | Short Inter X...Y Contact                        | O98B ..C17B          | 1.49   | Ang.   |  |
|                   |                                                  | 1/2-x,-y,3/2-z =     | 25_556 | Check  |  |
| PLAT432_ALERT_2_G | Short Inter X...Y Contact                        | O98B ..C98A          | 2.38   | Ang.   |  |
|                   |                                                  | 1/2-x,-y,3/2-z =     | 25_556 | Check  |  |

|                                                                    |                  |              |
|--------------------------------------------------------------------|------------------|--------------|
| PLAT432_ALERT_2_G Short Inter X...Y Contact                        | C17B ..C98B      | 2.32 Ang.    |
|                                                                    | 1/2-x,-y,3/2-z = | 25_556 Check |
| PLAT432_ALERT_2_G Short Inter X...Y Contact                        | C17B ..C98A      | 3.09 Ang.    |
|                                                                    | x,y,z =          | 1_555 Check  |
| PLAT432_ALERT_2_G Short Inter X...Y Contact                        | C17B ..C98A      | 3.19 Ang.    |
|                                                                    | 1/2-x,-y,3/2-z = | 25_556 Check |
| PLAT432_ALERT_2_G Short Inter X...Y Contact                        | C97 ..C97        | 2.54 Ang.    |
|                                                                    | 7/4-x,3/4-y,z =  | 14_655 Check |
| PLAT432_ALERT_2_G Short Inter X...Y Contact                        | C97 ..C97        | 2.84 Ang.    |
|                                                                    | x,3/4-y,7/4-z =  | 7_556 Check  |
| PLAT432_ALERT_2_G Short Inter X...Y Contact                        | C98A ..C98B      | 0.97 Ang.    |
|                                                                    | 1/2-x,-y,3/2-z = | 25_556 Check |
| PLAT764_ALERT_4_G Overcomplete CIF Bond List Detected (Rep/Expd) . |                  | 1.16 Ratio   |
| PLAT794_ALERT_5_G Tentative Bond Valency for Ti1 (IV) .            |                  | 4.17 Info    |
| PLAT860_ALERT_3_G Number of Least-Squares Restraints .....         |                  | 5 Note       |
| PLAT912_ALERT_4_G Missing # of FCF Reflections Above STh/L=        | 0.600            | 26 Note      |

---

0 **ALERT level A** = Most likely a serious problem - resolve or explain  
 5 **ALERT level B** = A potentially serious problem, consider carefully  
 10 **ALERT level C** = Check. Ensure it is not caused by an omission or oversight  
 34 **ALERT level G** = General information/check it is not something unexpected

2 ALERT type 1 CIF construction/syntax error, inconsistent or missing data  
 23 ALERT type 2 Indicator that the structure model may be wrong or deficient  
 5 ALERT type 3 Indicator that the structure quality may be low  
 16 ALERT type 4 Improvement, methodology, query or suggestion  
 3 ALERT type 5 Informative message, check

---

## Validation response form

Please find below a validation response form (VRF) that can be filled in and pasted into your CIF.

```
# start Validation Reply Form
_vrf_RINTA01_shelx
;
PROBLEM: The value of Rint is greater than 0.12
RESPONSE: ...
;
_vrf_PLAT020_shelx
;
PROBLEM: The Value of Rint is Greater Than 0.12 ..... 0.123 Report
RESPONSE: ...
;
_vrf_PLAT260_shelx
;
PROBLEM: Large Average Ueq of Residue Including 097 0.123 Check
RESPONSE: ...
;
_vrf_PLAT309_shelx
;
PROBLEM: Single Bonded Oxygen (C-O > 1.3 Ang) ..... 097 Check
RESPONSE: ...
;
_vrf_PLAT341_shelx
;
PROBLEM: Low Bond Precision on C-C Bonds ..... 0.00729 Ang.
RESPONSE: ...
;
_vrf_PLAT906_shelx
```

```
;
PROBLEM: Large K Value in the Analysis of Variance ..... 2.122 Check
RESPONSE: ...
;
_vrf_PLAT978_shelx
;
PROBLEM: Number C-C Bonds with Positive Residual Density. 0 Info
RESPONSE: ...
;
# end Validation Reply Form
```

---

It is advisable to attempt to resolve as many as possible of the alerts in all categories. Often the minor alerts point to easily fixed oversights, errors and omissions in your CIF or refinement strategy, so attention to these fine details can be worthwhile. In order to resolve some of the more serious problems it may be necessary to carry out additional measurements or structure refinements. However, the purpose of your study may justify the reported deviations and the more serious of these should normally be commented upon in the discussion or experimental section of a paper or in the "special\_details" fields of the CIF. checkCIF was carefully designed to identify outliers and unusual parameters, but every test has its limitations and alerts that are not important in a particular case may appear. Conversely, the absence of alerts does not guarantee there are no aspects of the results needing attention. It is up to the individual to critically assess their own results and, if necessary, seek expert advice.

#### **Publication of your CIF in IUCr journals**

A basic structural check has been run on your CIF. These basic checks will be run on all CIFs submitted for publication in IUCr journals (*Acta Crystallographica*, *Journal of Applied Crystallography*, *Journal of Synchrotron Radiation*); however, if you intend to submit to *Acta Crystallographica Section C* or *E* or *IUCrData*, you should make sure that full publication checks are run on the final version of your CIF prior to submission.

#### **Publication of your CIF in other journals**

Please refer to the *Notes for Authors* of the relevant journal for any special instructions relating to CIF submission.

---

**PLATON version of 19/10/2018; check.def file version of 15/10/2018**

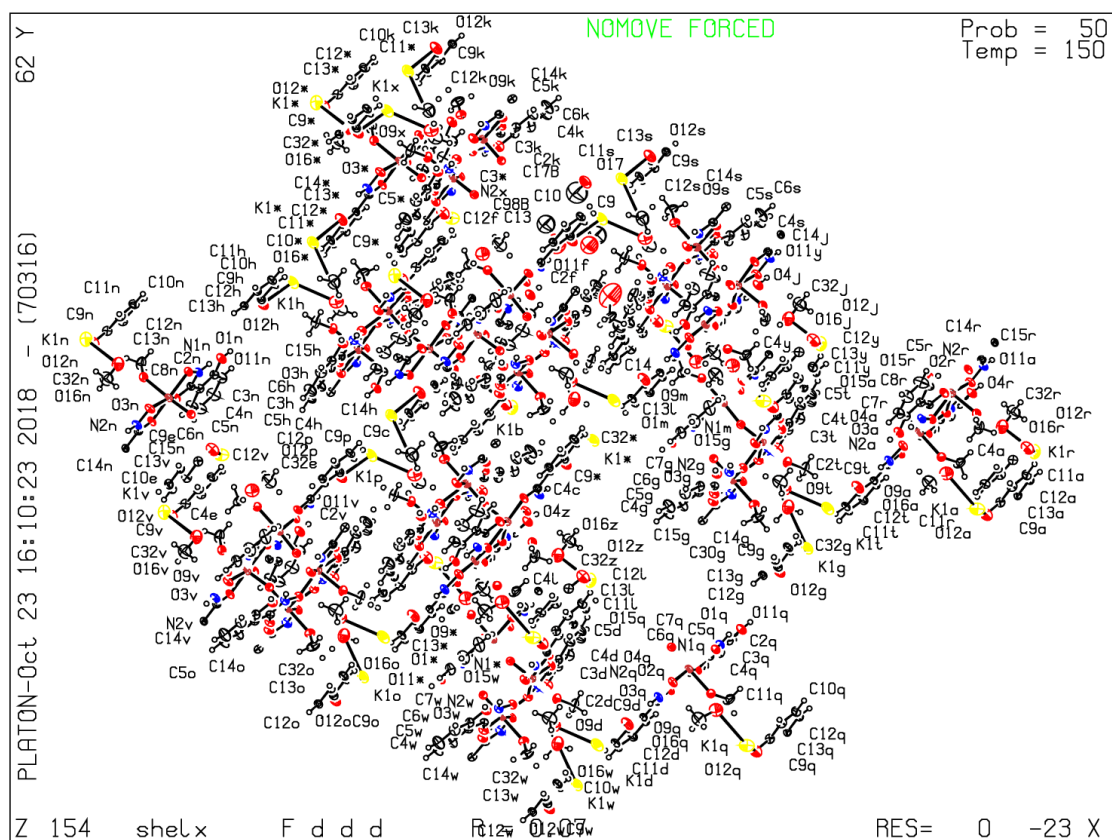

Supplement: s1 [file s1]
