# Supplementary material for: Synthesis, Structural and Physicochemical Characterization of a Titanium(IV) Compound with the Hydroxamate Ligand N,2-Dihydroxybenzamide
Source: MDPI journal article supplement (doi:10.3390/molecules26185588), 2021-09-15
Supplement: s1 [file s1]

**Supplementary Material: Synthesis, Structural and Physicochemical  
Characterization of a Titanium(IV) Compound with the Hydroxamate  
Ligand *N*,2-Dihydroxybenzamide**

**Stamatis S. Passadis <sup>1</sup>, Sofia Hadjithoma <sup>2</sup>, Panagiota Siafarika <sup>3</sup>, Angelos G.  
Kalampounias <sup>3,4, \*</sup>, Anastasios D. Keramidas <sup>2,\*</sup>, Haralampos N. Miras, <sup>5,\*</sup> and  
Themistoklis A. Kabanos <sup>1,\*</sup>**

**Contents**

|                                                                                                                                       |     |
|---------------------------------------------------------------------------------------------------------------------------------------|-----|
| <b>Figure S1.</b> Possible modes for hydroxamate binding                                                                              | S2  |
| <b>Figure S2.</b> Experimental and calculated IR spectra for the H <sub>2</sub> dihybe and <b>1</b> .                                 | S2  |
| <b>Figure S3.</b> 2D { <sup>1</sup> H, <sup>13</sup> C} HMBC of H <sub>2</sub> dihybe                                                 | S3  |
| <b>Figure S4.</b> 2D { <sup>1</sup> H} grCOSY of <b>1</b>                                                                             | S4  |
| <b>Figure S5.</b> 2D { <sup>1</sup> H, <sup>13</sup> C} grHSQC of <b>1</b>                                                            | S5  |
| <b>Figure S6.</b> 2D { <sup>1</sup> H, <sup>13</sup> C} grHMBC of <b>1</b>                                                            | S6  |
| <b>Figure S7.</b> 2D { <sup>1</sup> H, <sup>13</sup> C} grHSQC of <b>1</b> + 4 eq But <sub>4</sub> NOH + 0.1 eq H <sub>2</sub> dihybe | S7  |
| <b>Figure S8.</b> 2D { <sup>1</sup> H, <sup>13</sup> C} grHMBC of <b>1</b> + 4 eq But <sub>4</sub> NOH + 0.1 eq H <sub>2</sub> dihybe | S8  |
| <b>Figure S9.</b> Tauc plot of compound <b>1</b>                                                                                      | S9  |
| <b>Table S1.</b> <sup>1</sup> H and <sup>13</sup> C NMR of H <sub>3</sub> dihybe and species <b>2</b>                                 | S10 |
| <b>Table S2.</b> <sup>1</sup> H and <sup>13</sup> C NMR of H <sub>2</sub> dihybe and <b>1</b> after addition But <sub>4</sub> NOH     | S11 |
| <b>References</b>                                                                                                                     | S12 |

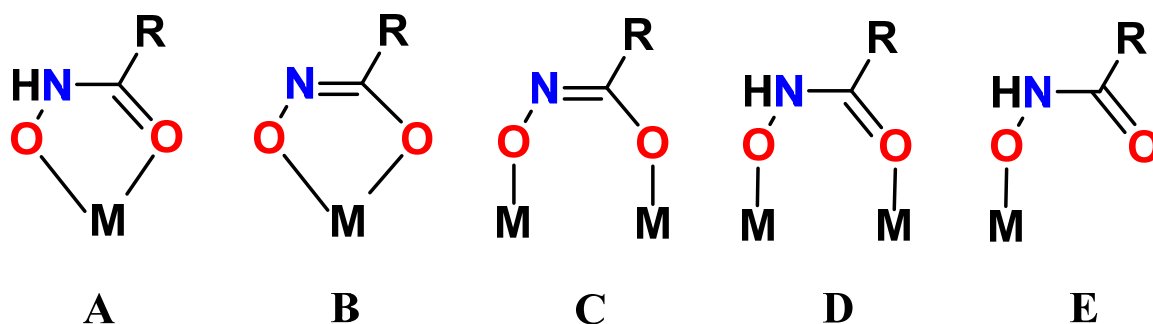

**Figure S1.** Possible modes for hydroxamate binding.

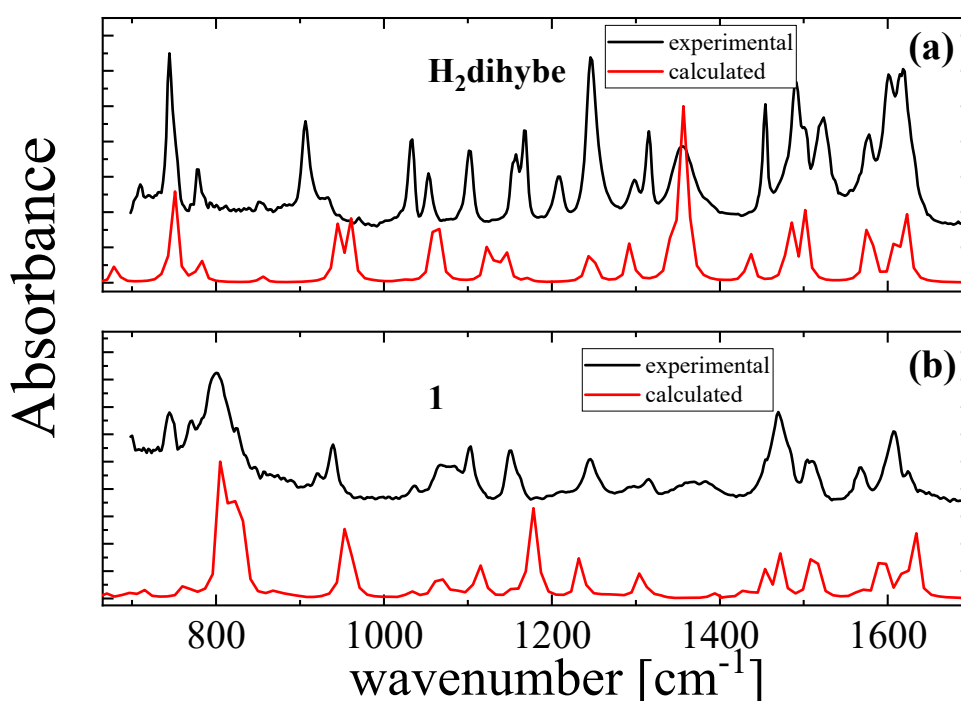

**Figure S2.** Experimental and calculated in vacuum by ab initio DFT/B3LYP/LANL2DZ modeling spectra for the H<sub>2</sub>dihybe (a) and **1** (b).

In Figures S2(a) and S2(b) are shown the experimental and theoretically predicted IR absorbance spectra of the H<sub>2</sub>dihybe and Ti-complex **1**, respectively. It seems that for both cases, namely for the H<sub>2</sub>dihybe and for the **1**, all main bands observed in the experimental spectra are also present in the calculated spectra which is in good agreement with the proposed structural model. Possible differences in their relative intensities and frequency shifts, mainly in the low-frequency region, are reasonable

considering that the calculation was performed in the vapor state without the presence of any additional interactions. The theoretical calculation performed to establish the formation of the Ti-complex in the solid state.

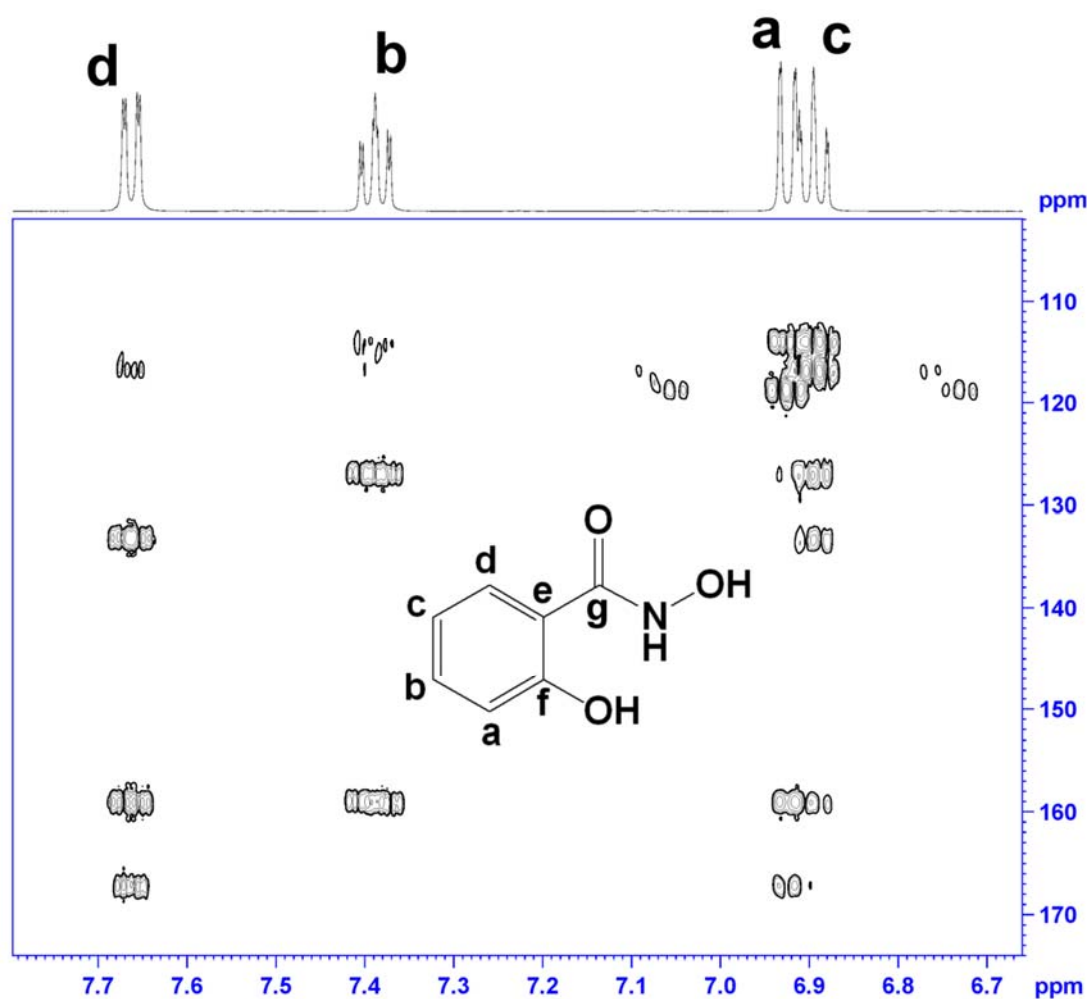

**Figure S3.** 2D  $\{^1\text{H}, ^{13}\text{C}\}$  HMBC of H<sub>2</sub>dihybe.

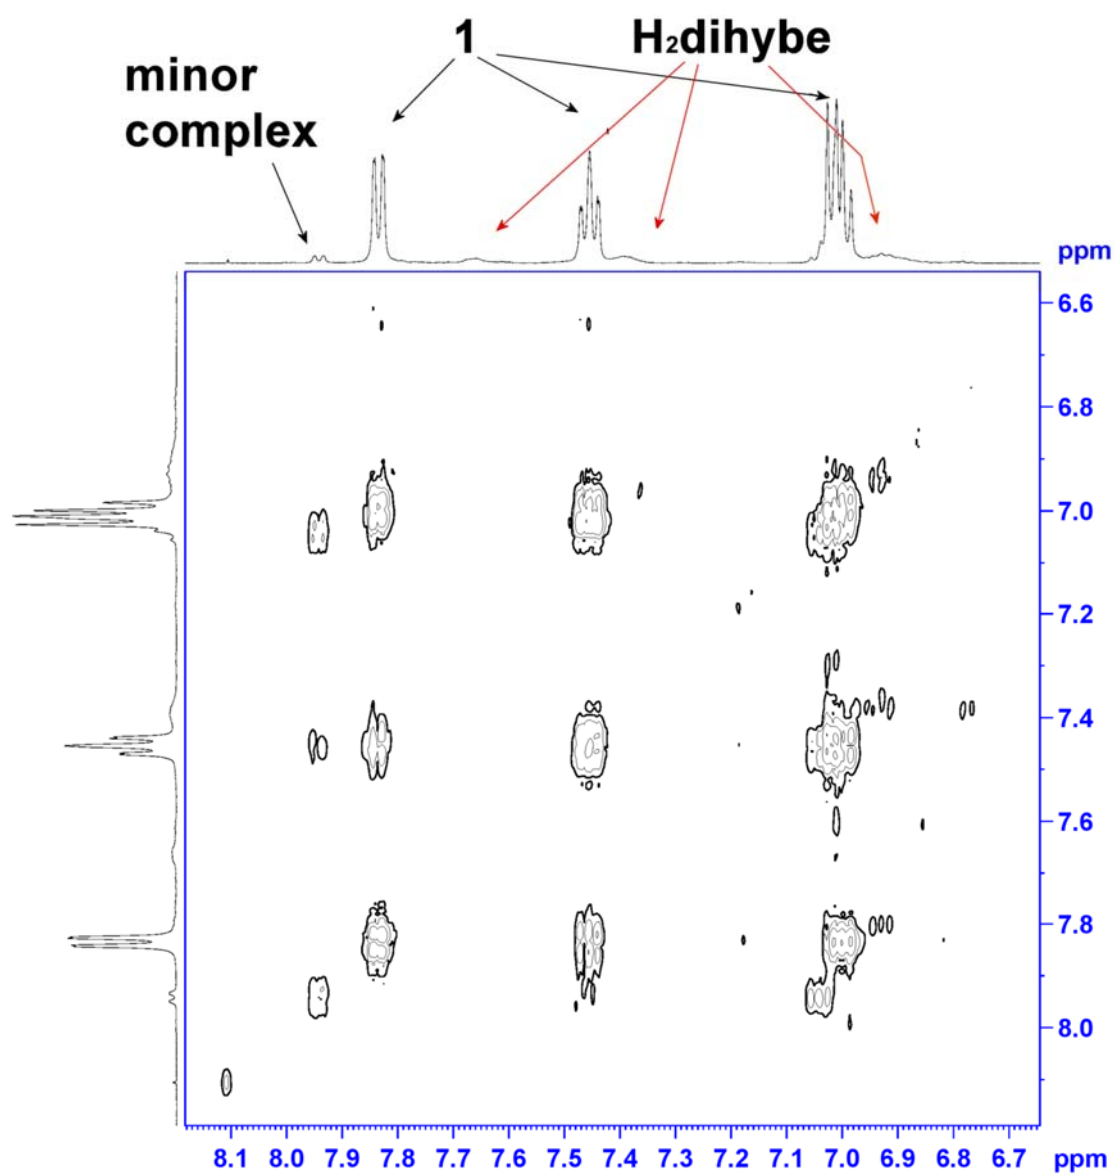

**Figure S4.** 2D  $\{^1\text{H}\}$  grCOSY of **1**.

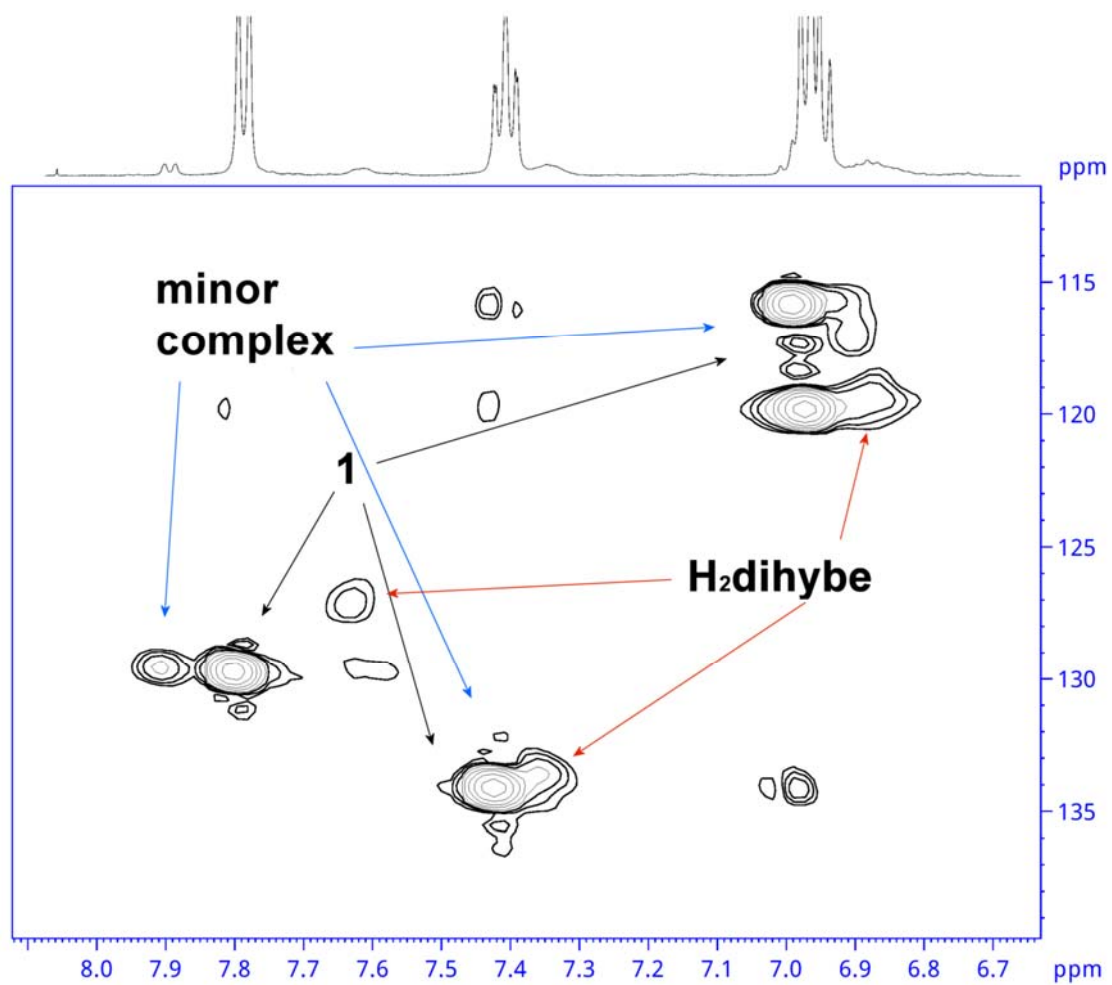

**Figure S5.** 2D  $\{^1\text{H}, ^{13}\text{C}\}$  grHSQC of **1**.

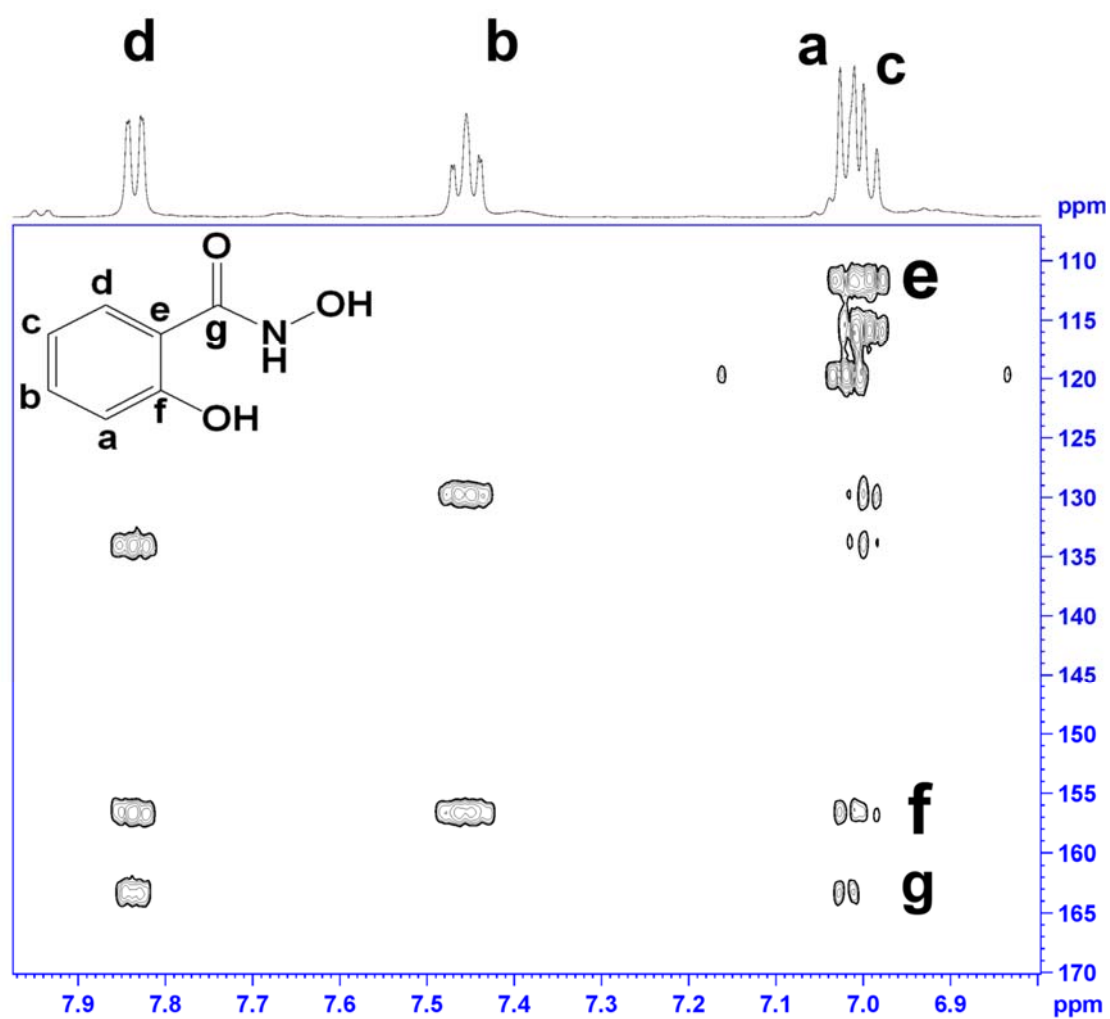

**Figure S6.** 2D  $\{^1\text{H}, ^{13}\text{C}\}$  grHMBC of **1**.

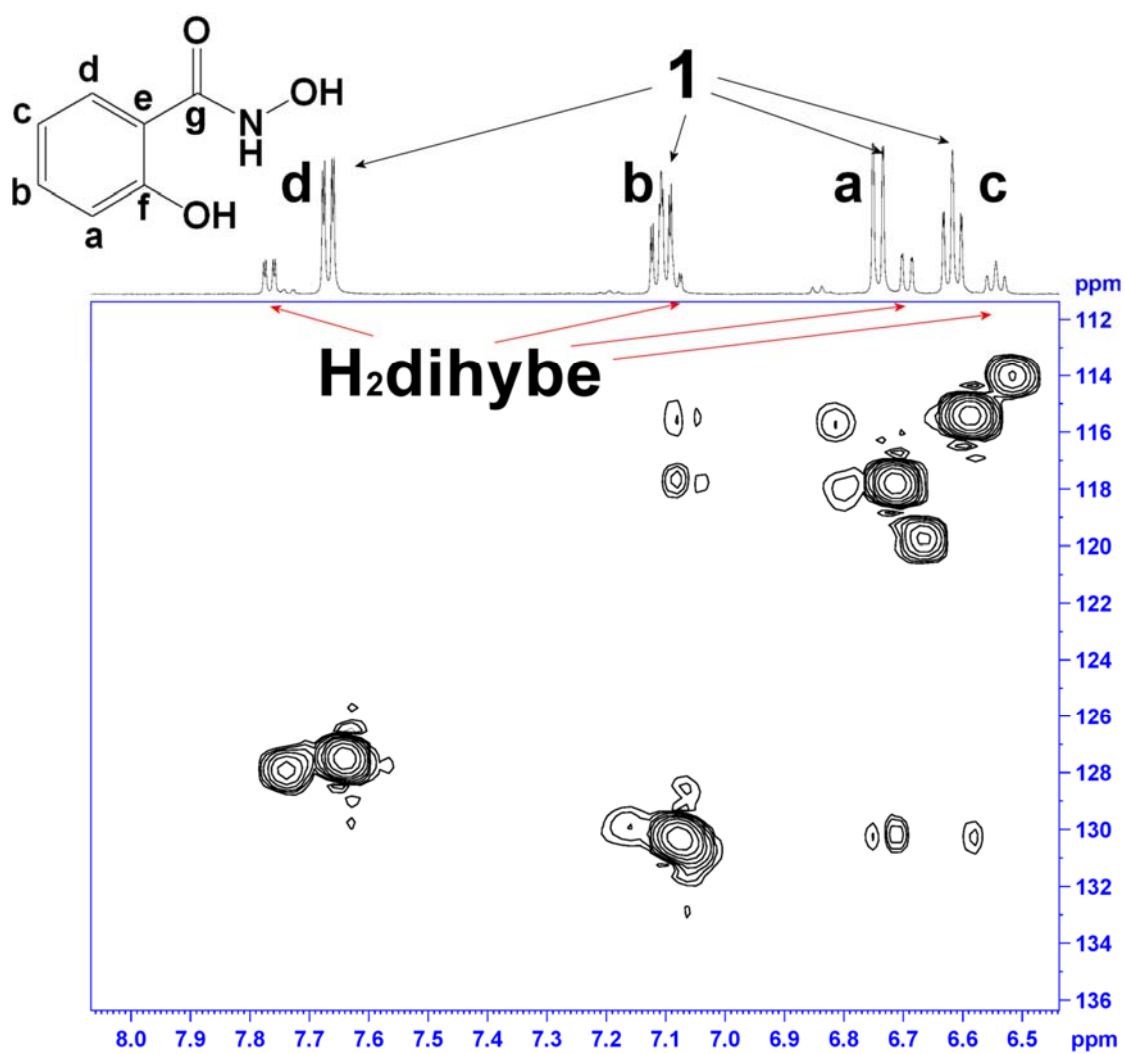

**Figure S7.** 2D  $\{^1\text{H}, ^{13}\text{C}\}$  grHSQC of **1** + 4 eq But<sub>4</sub>NOH + 0.1 eq H<sub>2</sub>dihybe.

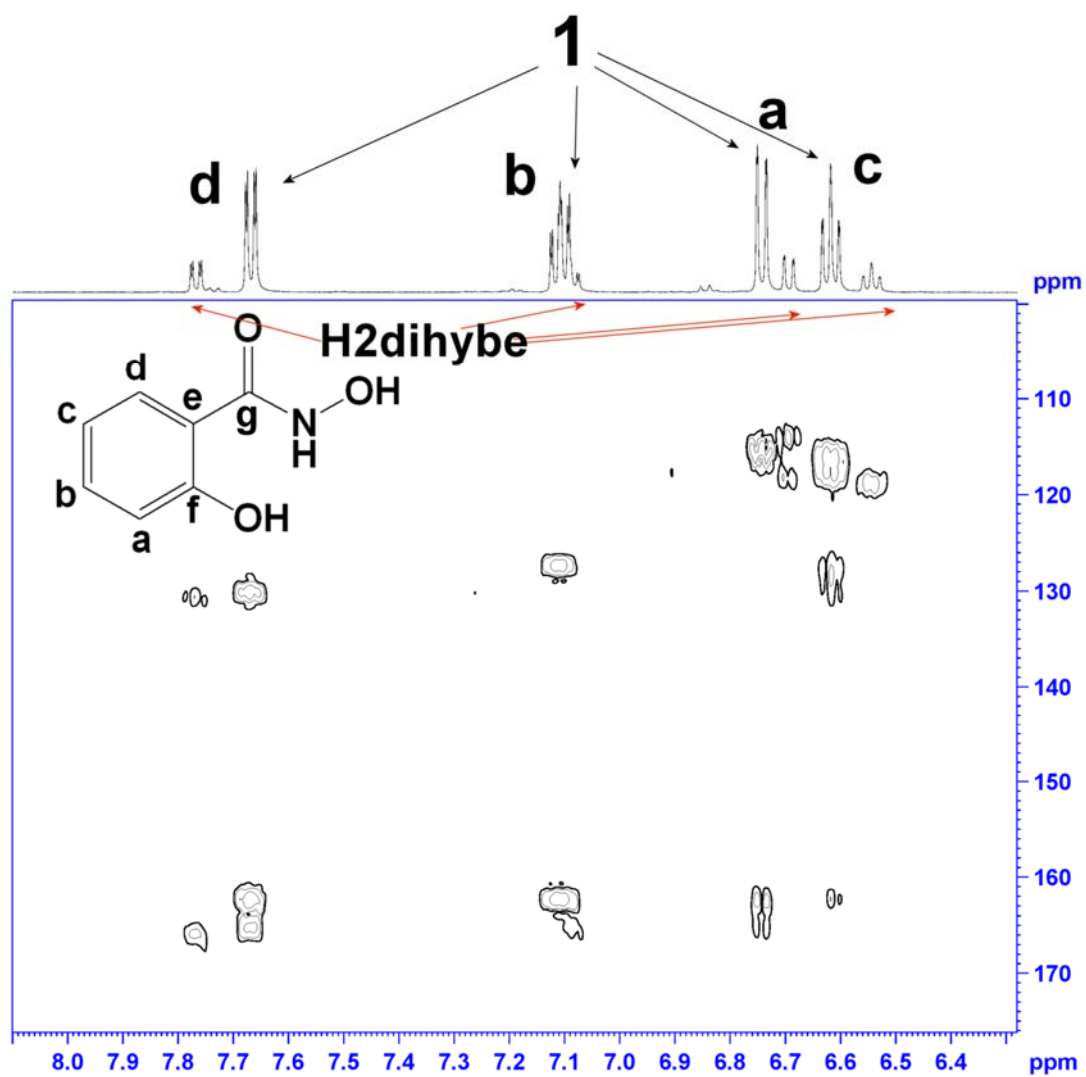

**Figure S8.** 2D  $\{^1\text{H}, ^{13}\text{C}\}$  grHMBC of **1** + 4 eq  $\text{But}_4\text{NOH}$  + 0.1 eq  $\text{H}_2\text{dihybe}$ .



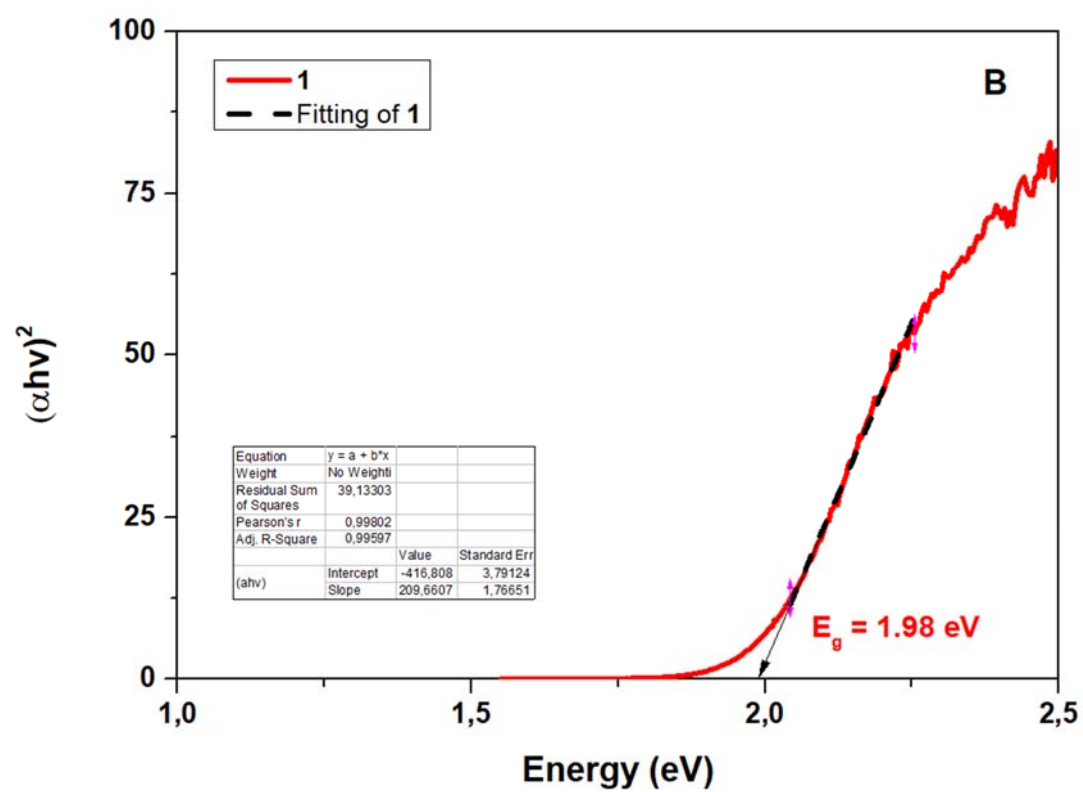

**Figure S9.** Tauc plot of compound **1**.

**Table S1.**  $^1\text{H}$  and  $^{13}\text{C}$  NMR chemical shifts (ppm) for the ligand H<sub>3</sub>dihybe, the minor titanium species **2** and the shielding/deshielding effect ( $\Delta\delta$ ) upon complexation.<sup>a</sup>

|                          | <b>2</b>        |              | H <sub>2</sub> dihybe |              |                                                 |                                              |
|--------------------------|-----------------|--------------|-----------------------|--------------|-------------------------------------------------|----------------------------------------------|
|                          | $^{13}\text{C}$ | $^1\text{H}$ | $^{13}\text{C}$       | $^1\text{H}$ | $^{13}\text{C}(\Delta\delta, \text{ppm})^\beta$ | $^1\text{H}(\Delta\delta, \text{ppm})^\beta$ |
| <b>C(d)</b> <sup>γ</sup> | 129.7           | 7.947        | 128.2                 | 7.669        | 1.5                                             | 0.278                                        |
| <b>C(c)</b> <sup>γ</sup> | 119.9           | 7.004        | 119.4                 | 6.897        | 0.5                                             | 0.107                                        |
| <b>C(b)</b> <sup>γ</sup> | 134.3           | 7.436        | 133.6                 | 7.338        | 0.7                                             | 0.098                                        |
| <b>C(a)</b> <sup>γ</sup> | 115.5           | 7.017        | 117.2                 | 6.928        | -1.7                                            | 0.089                                        |
| <b>C(g)</b> <sup>γ</sup> |                 |              | 167.2                 |              |                                                 |                                              |
| <b>C(f)</b> <sup>γ</sup> |                 |              | 159.2                 |              |                                                 |                                              |
| <b>C(e)</b> <sup>γ</sup> |                 |              | 114.1                 |              |                                                 |                                              |

<sup>a</sup> The chemical shifts of the protons are the center of multiplets. <sup>β</sup>  $\Delta\delta$  is the chemical shift difference between the chemical shift of the NMR peaks ( $^{13}\text{C}$  or  $^1\text{H}$ ) of the complex **2** and the respective peaks of the ligand. <sup>γ</sup> The carbon atoms of the ligand H<sub>2</sub>dihybe shown in Figure 6.

**Table S2.**  $^1\text{H}$  and  $^{13}\text{C}$  NMR chemical shifts (ppm) for **1** and  $\text{H}_2\text{dihybe}$  after addition of three equivalents of  $\text{But}_4\text{NOH}$  per **1**<sup>a</sup> and the shielding/deshielding effect ( $\Delta\delta$ , ppm) upon complexation.

|                          | <b>1</b>        |              | <b>H<sub>2</sub>dihybe</b> |              |                                                 |                                                  |
|--------------------------|-----------------|--------------|----------------------------|--------------|-------------------------------------------------|--------------------------------------------------|
|                          | $^{13}\text{C}$ | $^1\text{H}$ | $^{13}\text{C}$            | $^1\text{H}$ | $^{13}\text{C}(\Delta\delta, \text{ppm})^\beta$ | $^1\text{H}(\Delta\delta, \text{ppm})^{a,\beta}$ |
| <b>C(d)</b> <sup>γ</sup> | 127.6           | 7.667        | 128.0                      | 7.779        | -0.4                                            | -0.112                                           |
| <b>C(c)</b> <sup>γ</sup> | 115.4           | 6.617        | 114.1                      | 6.457        | 1.3                                             | 0.160                                            |
| <b>C(b)</b> <sup>γ</sup> | 130.4           | 7.017        | 131.6                      | 7.021        | -1.2                                            | -0.004                                           |
| <b>C(a)</b> <sup>γ</sup> | 117.9           | 6.740        | 119.8                      | 6.657        | -1.9                                            | 0.083                                            |
| <b>C(g)</b> <sup>γ</sup> | 165.2           |              | 165.9                      |              | -0.7                                            |                                                  |
| <b>C(f)</b> <sup>γ</sup> | 162.5           |              | 165.9                      |              | -0.4                                            |                                                  |
| <b>C(e)</b> <sup>γ</sup> | 116.3           |              | 118.4                      |              | -2.1                                            |                                                  |

<sup>a</sup> The chemical shifts for the protons are the center of multiplets. <sup>β</sup>  $\Delta\delta$  is the chemical shift difference between the chemical shift of the NMR peaks (either  $^{13}\text{C}$  or  $^1\text{H}$ ) of the complex **1** and the respective peaks of the ligand. <sup>γ</sup> The carbon atoms of the ligand  $\text{H}_2\text{dihybe}$  shown in Figure 6.

Addition of one to four equivalents  $\text{But}_4\text{NOH}$  to the  $\text{CD}_3\text{OD}$  solution of **1** and/or  $\text{H}_2\text{dihybe}$ , results in a shift of the aromatic proton and carbon peaks (Table S2, Figure 6D) compared to the free ligand, presumably due to deprotonation of the phenolic oxygen atom (Table S2)

In addition, the  $^1\text{H}$  NMR peaks of **1** with base are much sharper than the peaks of **1** without base, suggesting that after the addition of the base the chemical exchange is slower and the coordination of the ligand to the titanium is stronger. The values of  $^{13}\text{C}$  ( $\Delta\delta$ , ppm) from -0.4 to -2.1 (Table S2), suggest a similar ligation of the ligand to  $\text{Ti}^{\text{IV}}$

through the carbonylate and hydroxamate oxygen atoms. Coordination of  $\text{Ti}^{\text{IV}}$  to the deprotonated phenolic oxygen atom is excluded, because the  $\Delta\delta$  (ppm) value of -0.4 for  $^{13}\text{C}(\text{d})$  is much smaller than the expected (6 to 8 ppm) [1-5].

## References

1. Passadis, S. S.; Papanikolaou, M. G.; Elliott, A.; Tsiafoulis, C. G.; Tsipis, A. C.; Keramidas, A. D.; Miras, H. N.; Kabanos, T. A. Synthesis, Structural, and Physicochemical Characterization of a  $\text{Ti}_6$  and a Unique Type of  $\text{Zr}_6$  Oxo Clusters Bearing an Electron-Rich Unsymmetrical {OON} Catecholate/Oxime Ligand and Exhibiting Metalloaromaticity. *Inorg. Chem.* **2020**, *59*, 18345-18357.
2. Drouza, C.; Hadjithoma, S.; Nicolaou, M.; Keramidas, A. D. Structural characterization, hydrolytic stability, and dynamics of  $\text{cis-Mo}^{\text{VI}}\text{O}_2^{2+}$  hydroquinonate/phenolate complexes. *Polyhedron*. **2018**, *152*, 22-30.
3. Drouza, C.; Stylianou, M.; Keramidas, A. D., NMR characterization and dynamics of vanadium(V) complexes with tripod (hydroquinonate/phenolate) iminodiacetate ligands in aqueous solution. *Pure Appl. Chem.* **2009**, *81* (7), 1313-1321.
4. Drouza, C.; Stylianou, M.; Papaphilippou, P.; Keramidas, A. D., Structural and electron paramagnetic resonance (EPR) characterization of novel vanadium(V/IV) complexes with hydroquinonate-iminodiacetate ligands exhibiting "noninnocent" activity. *Pure Appl. Chem.* **2013**, *85* (2), 329-342.
5. Passadis, S. S.; Hadjithoma, S.; Kalampounias, A. G.; Tsipis, A. C.; Sproules, S.; Miras, H. N.; Keramidas, A. D.; Kabanos, T. A., Synthesis, structural and

physicochemical characterization of a new type Ti<sub>6</sub>-oxo cluster protected by a cyclic imide dioxime ligand. *Dalton Trans.* **2019**, 48 (17), 5551-5559.
