# Supplementary material for: Synthesis, Structural and Physicochemical Characterization of a Titanium(IV) Compound with the Hydroxamate Ligand N,2-Dihydroxybenzamide
Source: Molecules. 2021 Sep 15;26(18):5588. doi: 10.3390/molecules26185588 (PMC8465426; doi:10.3390/molecules26185588)
Supplement: Supplementary file 1 [file molecules-26-05588-s001.zip › CIF_P4.cif]

 
data_shelx
 
_audit_creation_method            'SHELXL-2018/3'
_shelx_SHELXL_version_number      '2018/3'
_chemical_name_systematic         ?
_chemical_name_common             ?
_chemical_melting_point           ?
_chemical_formula_moiety          'C36 H37 K2 N4 O22 Ti2' 
_chemical_formula_sum
 'C36 H37 K2 N4 O22 Ti2' 
_chemical_formula_weight          1051.69

loop_
 _atom_type_symbol
 _atom_type_description
 _atom_type_scat_dispersion_real
 _atom_type_scat_dispersion_imag
 _atom_type_scat_source
 'C'  'C'   0.0033   0.0016
 'International Tables Vol C Tables 4.2.6.8 and 6.1.1.4'
 'H'  'H'   0.0000   0.0000
 'International Tables Vol C Tables 4.2.6.8 and 6.1.1.4'
 'K'  'K'   0.2009   0.2494
 'International Tables Vol C Tables 4.2.6.8 and 6.1.1.4'
 'N'  'N'   0.0061   0.0033
 'International Tables Vol C Tables 4.2.6.8 and 6.1.1.4'
 'O'  'O'   0.0106   0.0060
 'International Tables Vol C Tables 4.2.6.8 and 6.1.1.4'
 'Ti'  'Ti'   0.2776   0.4457
 'International Tables Vol C Tables 4.2.6.8 and 6.1.1.4'
 
_space_group_crystal_system       orthorhombic
_space_group_IT_number            70
_space_group_name_H-M_alt         'F d d d'
_space_group_name_Hall            '-F 2uv 2vw'
 
_shelx_space_group_comment
;
The symmetry employed for this shelxl refinement is uniquely defined
by the following loop, which should always be used as a source of
symmetry information in preference to the above space-group names.
They are only intended as comments.
;
 
loop_
 _space_group_symop_operation_xyz
 'x, y, z'
 '-x+1/4, -y+1/4, z'
 'x, -y+1/4, -z+1/4'
 '-x+1/4, y, -z+1/4'
 'x, y+1/2, z+1/2'
 '-x+1/4, -y+3/4, z+1/2'
 'x, -y+3/4, -z+3/4'
 '-x+1/4, y+1/2, -z+3/4'
 'x+1/2, y, z+1/2'
 '-x+3/4, -y+1/4, z+1/2'
 'x+1/2, -y+1/4, -z+3/4'
 '-x+3/4, y, -z+3/4'
 'x+1/2, y+1/2, z'
 '-x+3/4, -y+3/4, z'
 'x+1/2, -y+3/4, -z+1/4'
 '-x+3/4, y+1/2, -z+1/4'
 '-x, -y, -z'
 'x-1/4, y-1/4, -z'
 '-x, y-1/4, z-1/4'
 'x-1/4, -y, z-1/4'
 '-x, -y+1/2, -z+1/2'
 'x-1/4, y+1/4, -z+1/2'
 '-x, y+1/4, z+1/4'
 'x-1/4, -y+1/2, z+1/4'
 '-x+1/2, -y, -z+1/2'
 'x+1/4, y-1/4, -z+1/2'
 '-x+1/2, y-1/4, z+1/4'
 'x+1/4, -y, z+1/4'
 '-x+1/2, -y+1/2, -z'
 'x+1/4, y+1/4, -z'
 '-x+1/2, y+1/4, z-1/4'
 'x+1/4, -y+1/2, z-1/4'
 
_cell_length_a                    20.040(4)
_cell_length_b                    26.118(5)
_cell_length_c                    36.745(11)
_cell_angle_alpha                 90
_cell_angle_beta                  90
_cell_angle_gamma                 90
_cell_volume                      19232(8)
_cell_formula_units_Z             16
_cell_measurement_temperature     150(2)
_cell_measurement_reflns_used     4803
_cell_measurement_theta_min       2.315
_cell_measurement_theta_max       42.640
 
_exptl_crystal_description        'block'
_exptl_crystal_colour             'orange'
_exptl_crystal_density_meas       .
_exptl_crystal_density_method     ?
_exptl_crystal_density_diffrn     1.453          
_exptl_crystal_F_000              8624
_exptl_transmission_factor_min    ?
_exptl_transmission_factor_max    ?
_exptl_crystal_size_max           0.200
_exptl_crystal_size_mid           0.170
_exptl_crystal_size_min           0.100
_exptl_absorpt_coefficient_mu     0.587
_shelx_estimated_absorpt_T_min    0.892
_shelx_estimated_absorpt_T_max    0.944
_exptl_absorpt_correction_type    'empirical'
_exptl_absorpt_correction_T_min   0.6576  
_exptl_absorpt_correction_T_max   0.7454
_exptl_absorpt_process_details    'SADABS'
_exptl_absorpt_special_details    ?
_diffrn_ambient_temperature       150(2)
_diffrn_radiation_wavelength      0.71073
_diffrn_radiation_type            MoK\a
_diffrn_source                    'fine-focus sealed tube'
_diffrn_measurement_device_type   'Bruker Apex II Quazar CCD'
_diffrn_measurement_method        '\w & \f scans'
_diffrn_detector_area_resol_mean  ?
_diffrn_reflns_number             45786
_diffrn_reflns_av_unetI/netI      0.0540
_diffrn_reflns_av_R_equivalents   0.1227
_diffrn_reflns_limit_h_min        -24
_diffrn_reflns_limit_h_max        25
_diffrn_reflns_limit_k_min        -32
_diffrn_reflns_limit_k_max        32
_diffrn_reflns_limit_l_min        -45
_diffrn_reflns_limit_l_max        45
_diffrn_reflns_theta_min          1.396
_diffrn_reflns_theta_max          26.515
_diffrn_reflns_theta_full         25.242
_diffrn_measured_fraction_theta_max   0.994
_diffrn_measured_fraction_theta_full  1.000
_diffrn_reflns_Laue_measured_fraction_max    0.994
_diffrn_reflns_Laue_measured_fraction_full   1.000
_diffrn_reflns_point_group_measured_fraction_max   0.994
_diffrn_reflns_point_group_measured_fraction_full  1.000
_reflns_number_total              4976
_reflns_number_gt                 3261
_reflns_threshold_expression      'I > 2\s(I)'
_reflns_Friedel_coverage          0.000
_reflns_Friedel_fraction_max      .
_reflns_Friedel_fraction_full     .
 
_reflns_special_details
;
 Reflections were merged by SHELXL according to the crystal
 class for the calculation of statistics and refinement.
 
 _reflns_Friedel_fraction is defined as the number of unique
 Friedel pairs measured divided by the number that would be
 possible theoretically, ignoring centric projections and
 systematic absences.
;
 
_computing_data_collection        'Bruker APEX2'
_computing_cell_refinement        'Bruker SAINT'
_computing_data_reduction         'Bruker SAINT'
_computing_structure_solution     'SHELXL-2018/3 (Sheldrick, 2018)'
_computing_structure_refinement 'SHELXL-2018/3 (Sheldrick, 2018)'
_computing_molecular_graphics     'Diamond3'
_computing_publication_material   'WinGX'
_refine_special_details           
;
 Refinement of F^2^ against ALL reflections.  The weighted R-factor wR and
 goodness of fit S are based on F^2^, conventional R-factors R are based
 on F, with F set to zero for negative F^2^. The threshold expression of
 F^2^ > 2\s(F^2^) is used only for calculating R-factors(gt) etc. and is
 not relevant to the choice of reflections for refinement.  R-factors based
 on F^2^ are statistically about twice as large as those based on F, and R-
 factors based on ALL data will be even larger.
;
_refine_ls_structure_factor_coef  Fsqd
_refine_ls_matrix_type            full
_refine_ls_weighting_scheme       calc
_refine_ls_weighting_details
'w=1/[\s^2^(Fo^2^)+(0.0999P)^2^+231.3823P] where P=(Fo^2^+2Fc^2^)/3'
_atom_sites_solution_primary      'direct'
_atom_sites_solution_secondary    'difmap'
_atom_sites_solution_hydrogens    geom
_refine_ls_hydrogen_treatment     constr
_refine_ls_extinction_method      none
_refine_ls_extinction_coef        .
_refine_ls_number_reflns          4976
_refine_ls_number_parameters      304
_refine_ls_number_restraints      5
_refine_ls_R_factor_all           0.1167
_refine_ls_R_factor_gt            0.0718
_refine_ls_wR_factor_ref          0.2215
_refine_ls_wR_factor_gt           0.1880
_refine_ls_goodness_of_fit_ref    1.052
_refine_ls_restrained_S_all       1.057
_refine_ls_shift/su_max           0.001
_refine_ls_shift/su_mean          0.000
 
loop_
 _atom_site_label
 _atom_site_type_symbol
 _atom_site_fract_x
 _atom_site_fract_y
 _atom_site_fract_z
 _atom_site_U_iso_or_equiv
 _atom_site_adp_type
 _atom_site_occupancy
 _atom_site_site_symmetry_order  
 _atom_site_calc_flag
 _atom_site_refinement_flags_posn
 _atom_site_refinement_flags_adp
 _atom_site_refinement_flags_occupancy
 _atom_site_disorder_assembly
 _atom_site_disorder_group
O97 O 0.875000 0.2942(6) 0.875000 0.187(7) Uani 1 2 d S T P . .
C97 C 0.8452(6) 0.3321(4) 0.8988(4) 0.058(4) Uani 0.5 1 d . . P . .
H97A H 0.863851 0.365953 0.893328 0.088 Uiso 0.5 1 calc R U P . .
H97B H 0.854801 0.323323 0.924219 0.088 Uiso 0.5 1 calc R U P . .
H97C H 0.796793 0.332769 0.895049 0.088 Uiso 0.5 1 calc R U P . .
C2 C 0.6368(2) 0.31643(19) 0.84838(13) 0.0303(11) Uani 1 1 d . . . . .
C3 C 0.7018(3) 0.3242(2) 0.83585(17) 0.0427(13) Uani 1 1 d . . . . .
H3 H 0.738172 0.323275 0.852387 0.051 Uiso 1 1 calc R U . . .
C4 C 0.7129(3) 0.3331(3) 0.79946(18) 0.0555(17) Uani 1 1 d . . . . .
H4 H 0.757223 0.338192 0.791103 0.067 Uiso 1 1 calc R U . . .
C5 C 0.6607(3) 0.3348(3) 0.77475(18) 0.0574(18) Uani 1 1 d . . . . .
H5 H 0.669209 0.341218 0.749714 0.069 Uiso 1 1 calc R U . . .
C6 C 0.5965(3) 0.3272(2) 0.78690(14) 0.0400(13) Uani 1 1 d . . . . .
H6 H 0.560535 0.328407 0.770085 0.048 Uiso 1 1 calc R U . . .
C7 C 0.5836(2) 0.31778(18) 0.82361(13) 0.0285(10) Uani 1 1 d . . . . .
C8 C 0.5144(2) 0.30884(17) 0.83431(12) 0.0246(10) Uani 1 1 d . . . . .
C9 C 0.5010(2) 0.06315(19) 0.80311(13) 0.0313(11) Uani 1 1 d . . . . .
C10 C 0.5006(3) 0.0652(2) 0.84077(13) 0.0344(12) Uani 1 1 d . . . . .
H10 H 0.459460 0.067236 0.853563 0.041 Uiso 1 1 calc R U . . .
C11 C 0.5606(3) 0.0641(2) 0.85980(14) 0.0361(12) Uani 1 1 d . . . . .
H11 H 0.560415 0.065661 0.885632 0.043 Uiso 1 1 calc R U . . .
C12 C 0.6207(3) 0.0609(2) 0.84125(13) 0.0344(11) Uani 1 1 d . . . . .
H12 H 0.661433 0.059502 0.854432 0.041 Uiso 1 1 calc R U . . .
C13 C 0.6216(2) 0.05963(17) 0.80363(13) 0.0288(10) Uani 1 1 d . . . . .
H13 H 0.662875 0.057966 0.791008 0.035 Uiso 1 1 calc R U . . .
C14 C 0.3115(2) 0.31083(18) 0.71588(13) 0.0261(10) Uani 1 1 d . . . . .
C15 C 0.3152(2) 0.30868(18) 0.75579(13) 0.0269(10) Uani 1 1 d . . . . .
C30 C 0.4254(3) 0.1911(2) 0.82353(19) 0.0504(16) Uani 1 1 d . . . . .
H30A H 0.461094 0.203058 0.807394 0.076 Uiso 1 1 calc R U . . .
H30B H 0.410111 0.157280 0.815454 0.076 Uiso 1 1 calc R U . . .
H30C H 0.442422 0.188609 0.848476 0.076 Uiso 1 1 calc R U . . .
C32 C 0.2079(4) 0.1835(3) 0.8153(2) 0.071(2) Uani 1 1 d . . . . .
H32A H 0.174487 0.156980 0.820108 0.107 Uiso 1 1 calc R U . . .
H32B H 0.219299 0.183349 0.789315 0.107 Uiso 1 1 calc R U . . .
H32C H 0.189800 0.217060 0.821931 0.107 Uiso 1 1 calc R U . . .
K1 K 0.30759(7) 0.06615(6) 0.81543(4) 0.0608(5) Uani 1 1 d D . . . .
N1 N 0.49668(18) 0.30465(15) 0.86851(10) 0.0259(8) Uani 1 1 d . . . . .
H1 H 0.525268 0.307760 0.886557 0.031 Uiso 1 1 calc R U . . .
N2 N 0.2626(2) 0.30457(16) 0.77683(10) 0.0312(9) Uani 1 1 d . . . . .
H2 H 0.221708 0.303368 0.768135 0.037 Uiso 1 1 calc R U . . .
O1 O 0.43020(15) 0.29503(12) 0.87401(9) 0.0271(7) Uani 1 1 d . . . . .
O2 O 0.46830(15) 0.30527(13) 0.81050(8) 0.0284(7) Uani 1 1 d . . . . .
O3 O 0.37147(15) 0.31029(12) 0.77211(8) 0.0274(7) Uani 1 1 d . . . . .
O4 O 0.27597(16) 0.30232(13) 0.81306(8) 0.0306(8) Uani 1 1 d . . . . .
O9 O 0.37128(16) 0.22618(12) 0.82245(9) 0.0307(7) Uani 1 1 d . . . . .
O11 O 0.62311(17) 0.30729(14) 0.88402(9) 0.0362(8) Uani 1 1 d . . . . .
H11A H 0.658796 0.307233 0.896017 0.054 Uiso 1 1 calc R U . . .
O12 O 0.44390(19) 0.06302(18) 0.78282(11) 0.0520(11) Uani 1 1 d . . . . .
O15 O 0.375000 0.375000 0.83332(11) 0.0275(10) Uani 1 2 d S T P . .
O16 O 0.2642(2) 0.17385(19) 0.83542(14) 0.0651(13) Uani 1 1 d . . . . .
O17 O 0.2249(2) -0.03478(19) 0.82292(12) 0.0606(12) Uani 1 1 d D . . . .
Ti1 Ti 0.37096(4) 0.30691(3) 0.82723(2) 0.0236(2) Uani 1 1 d . . . . .
O98A O 0.2283(8) 0.0709(6) 0.7416(4) 0.123(5) Uiso 0.5 1 d D . P . .
O98B O 0.3608(10) 0.0256(8) 0.7349(4) 0.161(7) Uiso 0.5 1 d D . P . .
C98A C 0.1630(11) 0.0605(11) 0.7481(8) 0.135(9) Uiso 0.5 1 d D . P . .
C98B C 0.3491(14) -0.0258(9) 0.7457(7) 0.132(9) Uiso 0.5 1 d D . P . .
C17B C 0.1960(17) -0.0394(14) 0.7892(6) 0.185(13) Uiso 0.5 1 d D . P . .
 
loop_
 _atom_site_aniso_label
 _atom_site_aniso_U_11
 _atom_site_aniso_U_22
 _atom_site_aniso_U_33
 _atom_site_aniso_U_23
 _atom_site_aniso_U_13
 _atom_site_aniso_U_12
O97 0.083(8) 0.159(12) 0.32(2) 0.000 -0.017(11) 0.000
C97 0.042(7) 0.030(6) 0.103(11) -0.012(6) -0.007(7) 0.008(5)
C2 0.027(2) 0.032(3) 0.032(3) 0.002(2) 0.000(2) 0.000(2)
C3 0.023(3) 0.055(4) 0.051(3) 0.004(3) -0.004(2) 0.002(2)
C4 0.030(3) 0.083(5) 0.054(4) 0.006(3) 0.011(3) 0.004(3)
C5 0.037(3) 0.092(5) 0.043(3) 0.015(3) 0.015(3) 0.017(3)
C6 0.026(3) 0.061(4) 0.033(3) 0.007(3) 0.001(2) 0.006(2)
C7 0.023(2) 0.030(3) 0.032(3) 0.000(2) 0.001(2) 0.0039(19)
C8 0.022(2) 0.026(2) 0.025(2) -0.0015(19) -0.0015(18) 0.0036(18)
C9 0.026(2) 0.036(3) 0.032(3) 0.000(2) 0.006(2) 0.003(2)
C10 0.033(3) 0.041(3) 0.029(3) 0.002(2) 0.016(2) 0.000(2)
C11 0.045(3) 0.042(3) 0.022(2) 0.002(2) 0.007(2) 0.005(2)
C12 0.033(3) 0.040(3) 0.029(2) 0.003(2) 0.001(2) 0.005(2)
C13 0.029(2) 0.030(2) 0.027(2) 0.003(2) 0.004(2) 0.006(2)
C14 0.024(2) 0.026(2) 0.028(2) -0.0020(19) -0.0098(19) 0.0008(19)
C15 0.029(2) 0.026(2) 0.026(2) 0.0001(19) -0.002(2) 0.005(2)
C30 0.037(3) 0.037(3) 0.077(4) -0.016(3) -0.006(3) 0.008(3)
C32 0.054(4) 0.090(6) 0.071(5) 0.003(4) -0.001(4) -0.012(4)
K1 0.0484(8) 0.0771(11) 0.0568(9) -0.0084(8) 0.0226(7) -0.0188(7)
N1 0.0183(18) 0.036(2) 0.024(2) -0.0002(17) -0.0028(15) -0.0019(16)
N2 0.025(2) 0.045(3) 0.024(2) 0.0014(18) -0.0074(16) 0.0041(18)
O1 0.0187(16) 0.0360(18) 0.0265(16) 0.0001(14) -0.0036(13) -0.0027(13)
O2 0.0210(16) 0.0405(19) 0.0237(16) -0.0022(14) -0.0016(13) 0.0028(14)
O3 0.0211(16) 0.0391(19) 0.0220(15) -0.0037(14) -0.0061(13) 0.0026(14)
O4 0.0238(17) 0.047(2) 0.0206(16) 0.0016(15) -0.0025(13) 0.0039(15)
O9 0.0257(17) 0.0310(17) 0.0354(18) -0.0043(14) -0.0050(15) 0.0054(14)
O11 0.0247(17) 0.053(2) 0.0306(18) 0.0007(16) -0.0074(15) -0.0021(16)
O12 0.033(2) 0.082(3) 0.041(2) 0.000(2) 0.0093(17) -0.001(2)
O15 0.031(2) 0.028(2) 0.023(2) 0.000 0.000 -0.001(2)
O16 0.048(3) 0.067(3) 0.080(3) 0.002(3) -0.001(2) -0.020(2)
O17 0.059(3) 0.071(3) 0.052(3) -0.010(2) 0.025(2) -0.017(2)
Ti1 0.0214(4) 0.0300(4) 0.0194(4) -0.0016(3) -0.0031(3) 0.0024(3)
 
_geom_special_details
;
 All esds (except the esd in the dihedral angle between two l.s. planes)
 are estimated using the full covariance matrix.  The cell esds are taken
 into account individually in the estimation of esds in distances, angles
 and torsion angles; correlations between esds in cell parameters are only
 used when they are defined by crystal symmetry.  An approximate (isotropic)
 treatment of cell esds is used for estimating esds involving l.s. planes.
;
 
loop_
 _geom_bond_atom_site_label_1
 _geom_bond_atom_site_label_2
 _geom_bond_distance
 _geom_bond_site_symmetry_2
 _geom_bond_publ_flag
O97 C97 1.450(14) . ?
O97 C97 1.450(14) 12_656 ?
C97 H97A 0.9800 . ?
C97 H97B 0.9800 . ?
C97 H97C 0.9800 . ?
C2 O11 1.359(6) . ?
C2 C3 1.395(7) . ?
C2 C7 1.403(7) . ?
C3 C4 1.375(9) . ?
C3 H3 0.9500 . ?
C4 C5 1.385(9) . ?
C4 H4 0.9500 . ?
C5 C6 1.377(8) . ?
C5 H5 0.9500 . ?
C6 C7 1.395(7) . ?
C6 H6 0.9500 . ?
C7 C8 1.461(6) . ?
C8 O2 1.275(5) . ?
C8 N1 1.310(6) . ?
C9 O12 1.366(6) . ?
C9 C10 1.385(7) . ?
C9 C14 1.400(6) 26_556 ?
C10 C11 1.392(8) . ?
C10 H10 0.9500 . ?
C11 C12 1.386(7) . ?
C11 H11 0.9500 . ?
C12 C13 1.383(7) . ?
C12 H12 0.9500 . ?
C13 C14 1.401(7) 26_556 ?
C13 H13 0.9500 . ?
C14 C15 1.469(6) . ?
C15 O3 1.278(5) . ?
C15 N2 1.312(6) . ?
C30 O9 1.422(6) . ?
C30 H30A 0.9800 . ?
C30 H30B 0.9800 . ?
C30 H30C 0.9800 . ?
C32 O16 1.372(8) . ?
C32 H32A 0.9800 . ?
C32 H32B 0.9800 . ?
C32 H32C 0.9800 . ?
K1 O12 2.984(4) . ?
K1 O16 3.035(5) . ?
K1 O17 3.126(5) . ?
K1 O98A 3.146(13) . ?
K1 O98B 3.319(14) . ?
N1 O1 1.371(5) . ?
N1 H1 0.8800 . ?
N2 O4 1.359(5) . ?
N2 H2 0.8800 . ?
O1 Ti1 2.088(3) 12_556 ?
O1 Ti1 2.112(3) . ?
O2 Ti1 2.046(3) . ?
O3 Ti1 2.027(3) . ?
O4 Ti1 1.977(3) . ?
O9 Ti1 2.116(3) . ?
O11 H11A 0.8400 . ?
O15 Ti1 1.7944(10) 14 ?
O15 Ti1 1.7944(10) . ?
O17 C17B 1.374(18) . ?
O98A C98A 1.357(17) . ?
O98B C98B 1.419(17) . ?
O98B C17B 1.48(3) 25_556 ?
C98A C98B 0.97(3) 25_556 ?
 
loop_
 _geom_angle_atom_site_label_1
 _geom_angle_atom_site_label_2
 _geom_angle_atom_site_label_3
 _geom_angle
 _geom_angle_site_symmetry_1
 _geom_angle_site_symmetry_3
 _geom_angle_publ_flag
C97 O97 C97 93.9(15) . 12_656 ?
O97 C97 H97A 109.5 . . ?
O97 C97 H97B 109.5 . . ?
H97A C97 H97B 109.5 . . ?
O97 C97 H97C 109.5 . . ?
H97A C97 H97C 109.5 . . ?
H97B C97 H97C 109.5 . . ?
O11 C2 C3 122.2(5) . . ?
O11 C2 C7 118.4(4) . . ?
C3 C2 C7 119.4(5) . . ?
C4 C3 C2 119.8(5) . . ?
C4 C3 H3 120.1 . . ?
C2 C3 H3 120.1 . . ?
C3 C4 C5 121.4(5) . . ?
C3 C4 H4 119.3 . . ?
C5 C4 H4 119.3 . . ?
C6 C5 C4 119.2(6) . . ?
C6 C5 H5 120.4 . . ?
C4 C5 H5 120.4 . . ?
C5 C6 C7 120.8(5) . . ?
C5 C6 H6 119.6 . . ?
C7 C6 H6 119.6 . . ?
C6 C7 C2 119.4(4) . . ?
C6 C7 C8 117.7(4) . . ?
C2 C7 C8 122.9(4) . . ?
O2 C8 N1 117.2(4) . . ?
O2 C8 C7 120.9(4) . . ?
N1 C8 C7 121.9(4) . . ?
O12 C9 C10 122.7(4) . . ?
O12 C9 C14 117.0(4) . 26_556 ?
C10 C9 C14 120.4(5) . 26_556 ?
C9 C10 C11 119.7(5) . . ?
C9 C10 H10 120.2 . . ?
C11 C10 H10 120.2 . . ?
C12 C11 C10 120.3(5) . . ?
C12 C11 H11 119.8 . . ?
C10 C11 H11 119.8 . . ?
C13 C12 C11 120.3(5) . . ?
C13 C12 H12 119.9 . . ?
C11 C12 H12 119.9 . . ?
C12 C13 C14 120.0(4) . 26_556 ?
C12 C13 H13 120.0 . . ?
C14 C13 H13 120.0 26_556 . ?
C9 C14 C13 119.3(4) 22_556 22_556 ?
C9 C14 C15 122.9(4) 22_556 . ?
C13 C14 C15 117.8(4) 22_556 . ?
O3 C15 N2 115.8(4) . . ?
O3 C15 C14 120.8(4) . . ?
N2 C15 C14 123.4(4) . . ?
O9 C30 H30A 109.5 . . ?
O9 C30 H30B 109.5 . . ?
H30A C30 H30B 109.5 . . ?
O9 C30 H30C 109.5 . . ?
H30A C30 H30C 109.5 . . ?
H30B C30 H30C 109.5 . . ?
O16 C32 H32A 109.5 . . ?
O16 C32 H32B 109.5 . . ?
H32A C32 H32B 109.5 . . ?
O16 C32 H32C 109.5 . . ?
H32A C32 H32C 109.5 . . ?
H32B C32 H32C 109.5 . . ?
O12 K1 O16 112.65(13) . . ?
O12 K1 O17 119.85(13) . . ?
O16 K1 O17 127.46(13) . . ?
O12 K1 O98A 96.7(3) . . ?
O16 K1 O98A 91.6(3) . . ?
O17 K1 O98A 80.9(3) . . ?
O12 K1 O98B 48.6(4) . . ?
O16 K1 O98B 127.1(4) . . ?
O17 K1 O98B 88.8(4) . . ?
O98A K1 O98B 53.5(5) . . ?
C8 N1 O1 114.8(4) . . ?
C8 N1 H1 122.6 . . ?
O1 N1 H1 122.6 . . ?
C15 N2 O4 115.0(4) . . ?
C15 N2 H2 122.5 . . ?
O4 N2 H2 122.5 . . ?
N1 O1 Ti1 125.2(3) . 12_556 ?
N1 O1 Ti1 113.6(2) . . ?
Ti1 O1 Ti1 113.63(14) 12_556 . ?
C8 O2 Ti1 118.8(3) . . ?
C15 O3 Ti1 117.6(3) . . ?
N2 O4 Ti1 116.4(3) . . ?
C30 O9 Ti1 130.0(3) . . ?
C2 O11 H11A 109.5 . . ?
C9 O12 K1 123.2(3) . . ?
Ti1 O15 Ti1 165.6(3) 14 . ?
C32 O16 K1 106.0(4) . . ?
C17B O17 K1 102.6(16) . . ?
O15 Ti1 O4 97.84(11) . . ?
O15 Ti1 O3 94.67(17) . . ?
O4 Ti1 O3 75.19(13) . . ?
O15 Ti1 O2 90.87(11) . . ?
O4 Ti1 O2 146.90(13) . . ?
O3 Ti1 O2 72.30(13) . . ?
O15 Ti1 O1 93.57(15) . 12_556 ?
O4 Ti1 O1 75.18(12) . 12_556 ?
O3 Ti1 O1 150.05(13) . 12_556 ?
O2 Ti1 O1 136.31(13) . 12_556 ?
O15 Ti1 O1 91.06(14) . . ?
O4 Ti1 O1 138.30(13) . . ?
O3 Ti1 O1 144.76(13) . . ?
O2 Ti1 O1 72.87(12) . . ?
O1 Ti1 O1 63.61(14) 12_556 . ?
O15 Ti1 O9 176.33(14) . . ?
O4 Ti1 O9 85.45(14) . . ?
O3 Ti1 O9 87.74(13) . . ?
O2 Ti1 O9 87.21(13) . . ?
O1 Ti1 O9 85.68(13) 12_556 . ?
O1 Ti1 O9 85.38(13) . . ?
C98A O98A K1 109.1(15) . . ?
C98B O98B C17B 106(2) . 25_556 ?
C98B O98B K1 90.0(13) . . ?
C17B O98B K1 102.0(14) 25_556 . ?
C98B C98A O98A 118(3) 25_556 . ?
C98A C98B O98B 175(4) 25_556 . ?
O17 C17B O98B 147(3) . 25_556 ?
 
_refine_diff_density_max    1.157
_refine_diff_density_min   -1.082
_refine_diff_density_rms    0.106

_shelx_res_file
;
TITL C2c_a.res in Fddd:2
    shelx.res
    created by SHELXL-2018/3 at 16:04:13 on 23-Oct-2018
CELL  0.71073  20.0398  26.1183  36.7446   90.000   90.000   90.000
ZERR     16.00   0.0038   0.0049   0.0107    0.000    0.000    0.000
LATT   4
SYMM  1/4 - X, 1/4 - Y,   Z
SYMM    X, 1/4 - Y, 1/4 - Z
SYMM  1/4 - X,   Y, 1/4 - Z
SFAC  C    H    K    N    O    TI
UNIT  576  592  32   64   352  32
MERG   2
DFIX  3.200 0.020 O98B K1
DFIX  3.200 0.020 O98A K1
DFIX  1.350 0.020 C98A O98A
DFIX  1.350 0.020 C98B O98B
DFIX  1.350 0.020 C17B O17
FMAP   2
PLAN   2
SIZE     0.100   0.170   0.200
BOND   $H
LIST   6
L.S.  30
acta
TEMP  -123.16
WGHT    0.099900  231.382294
FVAR       0.02251
O97   5    0.875000    0.294240    0.875000    10.50000    0.08255    0.15916 =
         0.32056    0.00000   -0.01699    0.00000
C97   1    0.845195    0.332145    0.898832    10.50000    0.04242    0.02977 =
         0.10315   -0.01170   -0.00709    0.00825
AFIX 137
H97A  2    0.863851    0.365953    0.893328    10.50000   -1.50000
H97B  2    0.854801    0.323323    0.924219    10.50000   -1.50000
H97C  2    0.796793    0.332769    0.895049    10.50000   -1.50000
AFIX   0
C2    1    0.636842    0.316435    0.848381    11.00000    0.02657    0.03220 =
         0.03199    0.00180    0.00034    0.00038
C3    1    0.701753    0.324172    0.835849    11.00000    0.02269    0.05478 =
         0.05077    0.00428   -0.00352    0.00231
AFIX  43
H3    2    0.738172    0.323275    0.852387    11.00000   -1.20000
AFIX   0
C4    1    0.712854    0.333106    0.799459    11.00000    0.02956    0.08283 =
         0.05410    0.00609    0.01094    0.00386
AFIX  43
H4    2    0.757223    0.338192    0.791103    11.00000   -1.20000
AFIX   0
C5    1    0.660750    0.334845    0.774747    11.00000    0.03731    0.09183 =
         0.04296    0.01544    0.01469    0.01692
AFIX  43
H5    2    0.669209    0.341218    0.749714    11.00000   -1.20000
AFIX   0
C6    1    0.596507    0.327222    0.786904    11.00000    0.02561    0.06127 =
         0.03311    0.00720    0.00111    0.00615
AFIX  43
H6    2    0.560535    0.328407    0.770085    11.00000   -1.20000
AFIX   0
C7    1    0.583580    0.317779    0.823607    11.00000    0.02300    0.03023 =
         0.03230    0.00045    0.00121    0.00390
C8    1    0.514353    0.308844    0.834312    11.00000    0.02235    0.02606 =
         0.02544   -0.00154   -0.00146    0.00357
C9    1    0.501036    0.063147    0.803108    11.00000    0.02616    0.03583 =
         0.03185    0.00019    0.00649    0.00319
C10   1    0.500570    0.065161    0.840774    11.00000    0.03341    0.04116 =
         0.02854    0.00167    0.01574   -0.00040
AFIX  43
H10   2    0.459460    0.067236    0.853563    11.00000   -1.20000
AFIX   0
C11   1    0.560611    0.064130    0.859801    11.00000    0.04478    0.04164 =
         0.02178    0.00160    0.00749    0.00531
AFIX  43
H11   2    0.560415    0.065661    0.885632    11.00000   -1.20000
AFIX   0
C12   1    0.620692    0.060879    0.841250    11.00000    0.03331    0.04042 =
         0.02945    0.00344    0.00099    0.00494
AFIX  43
H12   2    0.661433    0.059502    0.854432    11.00000   -1.20000
AFIX   0
C13   1    0.621555    0.059633    0.803626    11.00000    0.02891    0.03030 =
         0.02715    0.00251    0.00369    0.00604
AFIX  43
H13   2    0.662875    0.057966    0.791008    11.00000   -1.20000
AFIX   0
C14   1    0.311534    0.310828    0.715881    11.00000    0.02430    0.02608 =
         0.02798   -0.00197   -0.00984    0.00082
C15   1    0.315220    0.308680    0.755789    11.00000    0.02921    0.02568 =
         0.02579    0.00006   -0.00221    0.00514
C30   1    0.425432    0.191054    0.823527    11.00000    0.03699    0.03713 =
         0.07694   -0.01560   -0.00550    0.00773
AFIX 137
H30A  2    0.461094    0.203058    0.807394    11.00000   -1.50000
H30B  2    0.410111    0.157280    0.815454    11.00000   -1.50000
H30C  2    0.442422    0.188609    0.848476    11.00000   -1.50000
AFIX   0
C32   1    0.207917    0.183499    0.815252    11.00000    0.05412    0.08980 =
         0.07055    0.00311   -0.00062   -0.01227
AFIX 137
H32A  2    0.174487    0.156980    0.820108    11.00000   -1.50000
H32B  2    0.219299    0.183349    0.789315    11.00000   -1.50000
H32C  2    0.189800    0.217060    0.821931    11.00000   -1.50000
AFIX   0
K1    3    0.307586    0.066148    0.815434    11.00000    0.04842    0.07709 =
         0.05678   -0.00845    0.02257   -0.01880
N1    4    0.496678    0.304647    0.868515    11.00000    0.01829    0.03550 =
         0.02396   -0.00015   -0.00282   -0.00194
AFIX  43
H1    2    0.525268    0.307760    0.886557    11.00000   -1.20000
AFIX   0
N2    4    0.262597    0.304572    0.776827    11.00000    0.02513    0.04479 =
         0.02364    0.00141   -0.00740    0.00413
AFIX  43
H2    2    0.221708    0.303368    0.768135    11.00000   -1.20000
AFIX   0
O1    5    0.430200    0.295031    0.874007    11.00000    0.01867    0.03603 =
         0.02647    0.00007   -0.00356   -0.00273
O2    5    0.468302    0.305266    0.810499    11.00000    0.02099    0.04049 =
         0.02375   -0.00224   -0.00157    0.00280
O3    5    0.371469    0.310291    0.772112    11.00000    0.02107    0.03910 =
         0.02200   -0.00370   -0.00614    0.00264
O4    5    0.275974    0.302317    0.813057    11.00000    0.02379    0.04731 =
         0.02057    0.00162   -0.00247    0.00386
O9    5    0.371278    0.226184    0.822448    11.00000    0.02574    0.03104 =
         0.03535   -0.00431   -0.00498    0.00541
O11   5    0.623110    0.307285    0.884024    11.00000    0.02469    0.05344 =
         0.03057    0.00066   -0.00739   -0.00209
AFIX  83
H11A  2    0.658796    0.307233    0.896017    11.00000   -1.50000
AFIX   0
O12   5    0.443896    0.063021    0.782820    11.00000    0.03277    0.08184 =
         0.04141   -0.00046    0.00929   -0.00130
O15   5    0.375000    0.375000    0.833325    10.50000    0.03148    0.02835 =
         0.02261    0.00000    0.00000   -0.00066
O16   5    0.264168    0.173847    0.835425    11.00000    0.04810    0.06726 =
         0.07996    0.00236   -0.00094   -0.02045
O17   5    0.224861   -0.034779    0.822919    11.00000    0.05853    0.07089 =
         0.05242   -0.01040    0.02466   -0.01729
TI1   6    0.370959    0.306907    0.827225    11.00000    0.02143    0.02996 =
         0.01942   -0.00157   -0.00314    0.00239
O98A  5    0.228298    0.070856    0.741601    10.50000    0.12254
O98B  5    0.360788    0.025606    0.734883    10.50000    0.16063
C98A  1    0.163004    0.060518    0.748095    10.50000    0.13549
C98B  1    0.349093   -0.025768    0.745663    10.50000    0.13184
C17B  1    0.195966   -0.039370    0.789154    10.50000    0.18466
HKLF    4


REM  C2c_a.res in Fddd:2
REM wR2 = 0.2215, GooF = S = 1.052, Restrained GooF = 1.057 for all data
REM R1 = 0.0718 for 3261 Fo > 4sig(Fo) and 0.1167 for all 4976 data
REM 304 parameters refined using 5 restraints

END

WGHT      0.0999    231.3657

REM Highest difference peak  1.157,  deepest hole -1.082,  1-sigma level  0.106
Q1    1   0.6822  0.0581  0.7877  11.00000  0.05    1.16
Q2    1   0.8750  0.3750  0.9614  10.50000  0.05    1.12
;
_shelx_res_checksum   86613

_shelx_hkl_file
;
   0  -2   2  279.07    8.20
   0   2  -2  267.27    8.20
   0  -2   2  270.47    8.20
   0  -2   2  281.87    8.30
   0  -4   4    5.60    0.60
   0  -4   4    5.80    0.70
   0  -4   4    6.40    0.70
   0   4  -4    5.80    0.60
   0  -4   4    5.40    0.50
   0  -6   6  124.29    4.40
   0  -6   6  123.29    4.30
   0   6  -6  125.09    4.30
   0  -6   6  126.29    4.10
   0  -6   6  127.49    4.30
   0  -8   8  292.87    9.30
   0  -8   8  279.07    9.00
   0  -8   8  293.07    9.30
   0   8  -8  279.17    9.20
   0  -8   8  288.77    9.40
   0 -10  10   15.30    1.50
   0 -10  10   13.50    1.60
   0  10 -10   14.90    1.50
   0 -10  10   13.80    1.30
   0 -10  10   14.80    1.50
   0 -12  12    1.50    0.90
   0  12 -12    1.60    0.80
   0 -12  12    0.50    0.80
   0 -12  12    1.40    0.90
   0 -12  12    0.30    0.60
   0 -14  14    7.70    1.40
   0  14 -14    6.90    1.30
   0 -14  14    7.90    1.50
   0 -14  14    5.00    1.00
   0 -16  16    2.00    1.20
   0  16 -16    0.00    0.90
   0 -16  16    1.90    1.00
   0 -16  16    1.80    1.20
   0  18 -18    3.80    1.40
   0 -18  18    3.50    1.50
   0 -20  20   12.60    2.10
   0  20 -20   10.60    2.00
   0 -22  22    7.00    1.90
   0  22 -22    5.80    1.70
   0 -24  24    3.20    1.80
   0  24 -24    1.10    1.70
   0  26 -26    0.20    1.80
   0 -26  26   -2.60    1.70
   1  -1   1  395.56   11.70
  -1  -3   3    3.70    0.40
  -1   3  -3    3.90    0.40
  -1  -3   3    4.10    0.50
  -1  -3   3    3.70    0.50
   1   3  -3    3.30    0.40
   1  -3   3    4.90    0.50
   1  -3   3    3.50    0.40
   1  -3   3    3.70    0.40
  -1  -5   5  151.68    4.90
  -1  -5   5  147.79    4.80
  -1  -5   5  143.49    4.80
  -1   5  -5  144.09    4.80
   1  -5   5  145.99    4.80
   1   5  -5  142.99    4.70
   1  -5   5  140.69    4.90
   1  -5   5  141.59    4.50
   1  -5   5  150.38    4.80
  -1  -7   7    5.60    0.90
  -1  -7   7    6.40    0.80
  -1  -7   7    5.60    0.80
  -1   7  -7    4.50    0.70
   1   7  -7    4.90    0.70
   1  -7   7    5.50    0.60
   1  -7   7    6.00    0.80
   1  -7   7    7.10    0.90
   1  -7   7    4.30    0.80
  -1  -9   9    6.00    1.10
  -1  -9   9    6.50    0.90
  -1   9  -9    4.60    0.80
  -1  -9   9    6.40    1.00
   1  -9   9    5.20    0.70
   1   9  -9    5.70    1.00
   1  -9   9    5.00    1.00
   1  -9   9    4.70    0.90
   1  -9   9    4.40    0.80
  -1 -11  11    9.70    1.20
  -1  11 -11    8.60    1.20
  -1 -11  11   12.40    1.50
  -1 -11  11    7.70    1.40
   1 -11  11    8.40    1.40
   1  11 -11    9.10    1.20
   1 -11  11    7.90    1.20
   1 -11  11    8.50    1.00
   1 -11  11   10.70    1.40
  -1 -13  13    1.10    0.90
  -1  13 -13    1.60    0.80
  -1 -13  13    0.10    0.70
  -1 -13  13    0.90    0.80
   1 -13  13   -1.30    0.80
   1  13 -13    1.00    0.80
   1 -13  13    0.40    0.70
   1 -13  13    1.20    0.90
   1 -13  13    0.40    0.80
  -1  15 -15   17.70    1.90
  -1 -15  15   14.10    1.60
  -1 -15  15   12.70    1.80
   1 -15  15   16.20    2.00
   1 -15  15   15.60    2.10
   1 -15  15   17.00    1.60
   1  15 -15   17.20    1.90
   1 -15  15   16.00    1.80
  -1 -17  17    5.00    1.50
  -1 -17  17    3.20    1.10
  -1  17 -17    4.90    1.30
   1  17 -17    5.10    1.30
   1 -17  17    6.50    1.70
   1 -17  17    4.10    1.30
  -1 -19  19    1.40    1.30
  -1  19 -19    0.90    1.10
   1  19 -19    2.70    1.30
   1 -19  19    2.50    1.40
  -1  21 -21    2.70    1.50
  -1 -21  21    4.00    1.60
   1 -21  21    2.00    1.50
   1  21 -21    3.60    1.60
  -1  23 -23    7.40    1.90
  -1 -23  23    4.00    1.90
   1 -23  23    5.00    1.90
   1  23 -23    1.60    1.70
  -1  25 -25    0.90    1.70
  -1 -25  25   -1.90    1.50
   1  25 -25    2.40    1.90
   1 -25  25    3.00    1.80
  -2   0   0    0.20    0.20
   2   0   0    0.30    0.10
  -2  -2   2   33.60    1.30
   2   2  -2   31.90    1.20
   2  -2   2   33.20    1.30
   2  -2   2   31.50    1.20
   2  -2   2   31.60    1.20
  -2  -4   4   93.59    3.30
  -2  -4   4   99.69    3.40
  -2   4  -4   98.09    3.30
   2  -4   4   97.79    3.30
   2  -4   4   95.59    3.30
   2  -4   4  100.09    3.40
   2   4  -4   97.19    3.30
  -2  -6   6    6.90    0.80
  -2  -6   6    4.70    0.70
  -2   6  -6    6.30    0.70
   2   6  -6    5.90    0.70
   2  -6   6    5.10    0.70
   2  -6   6    6.10    0.80
   2  -6   6    5.80    0.50
   2  -6   6    5.60    0.80
  -2   8  -8    0.70    0.60
  -2  -8   8    0.40    0.60
  -2  -8   8   -0.30    0.60
  -2  -8   8    0.30    0.60
   2  -8   8    0.10    0.50
   2   8  -8   -0.40    0.40
   2  -8   8    0.10    0.60
   2  -8   8   -0.70    0.50
   2  -8   8    0.10    0.30
  -2  10 -10    0.00    0.70
  -2 -10  10    0.20    0.80
  -2 -10  10    1.90    0.80
  -2 -10  10   -0.80    0.80
   2  10 -10    0.90    0.70
   2 -10  10   -0.40    0.70
   2 -10  10    0.70    0.80
   2 -10  10   -0.10    0.50
   2 -10  10    0.50    0.80
  -2  12 -12   15.00    1.60
  -2 -12  12   14.90    1.60
  -2 -12  12   13.50    1.50
   2 -12  12   15.40    1.80
   2 -12  12   19.30    1.80
   2 -12  12   13.20    1.20
   2  12 -12   18.20    1.70
   2 -12  12   13.50    1.50
  -2  14 -14   12.60    1.50
  -2 -14  14    6.80    1.30
  -2 -14  14    9.80    1.40
   2 -14  14    9.60    1.60
   2  14 -14   10.20    1.40
   2 -14  14    9.60    1.10
   2 -14  14   10.90    1.60
   2 -14  14    7.20    1.30
  -2  16 -16    6.20    1.40
  -2 -16  16    4.90    1.30
  -2 -16  16    5.40    1.20
   2 -16  16    5.50    1.40
   2 -16  16    3.10    1.20
   2 -16  16    4.80    1.40
   2  16 -16    6.00    1.30
  -2  18 -18    0.30    1.10
  -2 -18  18    0.20    1.10
  -2 -18  18   -1.20    1.00
   2 -18  18    0.30    1.10
   2  18 -18    1.30    1.20
   2 -18  18    0.20    1.20
   2 -18  18    1.00    1.10
  -2 -20  20    5.70    1.70
  -2  20 -20    6.40    1.70
   2 -20  20    4.70    1.60
   2  20 -20    5.50    1.60
  -2 -22  22    2.20    1.60
  -2  22 -22    1.90    1.50
   2  22 -22    1.00    1.40
   2 -22  22    0.90    1.60
  -2 -24  24    0.70    1.60
  -2  24 -24   -1.60    1.40
   2  24 -24    0.40    1.70
   2 -24  24    0.90    1.70
  -2 -26  26    1.80    1.80
  -2  26 -26   -0.60    1.80
   2 -26  26   -0.50    1.60
   2  26 -26   -0.90    1.70
  -3   1  -1  409.66   12.00
  -3  -1   1  420.06   12.20
   3   1  -1  397.06   12.00
   3   1  -1  400.36   12.10
   3  -1   1  400.56   12.00
   3  -1   1  400.46   12.10
  -3  -3   3   16.40    1.00
   3  -3   3   17.20    1.00
   3   3  -3   15.00    0.90
   3  -3   3   16.20    0.90
   3  -3   3   16.60    0.90
  -3   5  -5    7.40    0.80
  -3  -5   5    9.80    0.90
   3  -5   5    9.70    0.90
   3  -5   5    9.00    0.90
   3  -5   5    9.00    0.90
   3   5  -5    9.10    0.80
  -3  -7   7    3.80    0.80
  -3   7  -7    3.20    0.70
  -3  -7   7    3.10    0.70
   3   7  -7    3.40    0.70
   3  -7   7    3.00    0.70
   3  -7   7    4.60    0.80
   3  -7   7    2.50    0.60
  -3   9  -9    3.20    0.80
  -3  -9   9    4.70    1.00
  -3  -9   9    5.10    1.00
   3  -9   9    3.10    0.90
   3  -9   9    4.40    1.00
   3   9  -9    4.90    0.90
   3  -9   9    4.80    1.00
   3  -9   9    5.90    0.60
  -3 -11  11    5.10    1.00
  -3 -11  11    5.20    1.10
  -3  11 -11    4.60    1.10
   3 -11  11    6.00    1.20
   3 -11  11    4.80    1.20
   3 -11  11    6.00    1.00
   3 -11  11    4.70    0.70
   3  11 -11    5.50    1.00
  -3 -13  13   29.70    2.20
  -3  13 -13   33.50    2.20
  -3 -13  13   32.50    2.20
   3 -13  13   33.60    2.30
   3 -13  13   37.40    2.50
   3 -13  13   30.90    1.60
   3  13 -13   34.10    2.20
   3 -13  13   33.10    2.20
  -3 -15  15    9.50    1.60
  -3 -15  15    9.90    1.50
  -3  15 -15    7.60    1.40
   3 -15  15    8.20    1.50
   3  15 -15   11.00    1.60
   3 -15  15    8.80    1.50
   3 -15  15   14.30    2.00
  -3 -17  17    0.90    1.10
  -3 -17  17    0.00    1.10
  -3  17 -17    2.90    1.30
   3 -17  17    1.50    1.30
   3 -17  17    0.50    1.20
   3 -17  17    1.70    1.20
   3  17 -17    4.10    1.20
  -3 -19  19   -0.60    1.20
  -3 -19  19    2.20    1.50
  -3  19 -19    1.40    1.30
   3 -19  19    1.20    1.40
   3  19 -19    1.70    1.30
   3 -19  19    1.10    1.30
   3 -19  19    2.80    1.50
  -3 -21  21    4.20    1.70
  -3  21 -21    4.40    1.70
   3  21 -21    5.60    1.70
   3 -21  21    5.10    1.80
  -3 -23  23    0.40    1.50
  -3  23 -23   -1.40    1.40
   3  23 -23    0.50    1.60
   3 -23  23    2.00    1.70
  -3 -25  25    1.80    1.80
  -3  25 -25    3.80    2.00
   3 -25  25    0.70    1.80
   3  25 -25    2.40    1.70
  -4   0   0  267.47    8.00
   4   0   0  253.37    7.90
   4   0   0  254.77    7.80
  -4   2  -2  167.28    5.20
  -4  -2   2  167.98    5.50
   4  -2   2  171.18    5.20
   4   2  -2  166.68    5.30
   4  -2   2  165.48    5.40
   4  -2   2  168.98    5.40
   4   2  -2  164.78    5.20
  -4  -4   4   -0.10    0.40
  -4   4  -4    0.60    0.40
   4  -4   4    0.30    0.40
   4   4  -4    0.50    0.40
   4  -4   4    0.40    0.40
   4  -4   4    0.80    0.40
  -4  -6   6   41.70    2.00
  -4   6  -6   39.70    1.90
   4  -6   6   39.10    1.90
   4  -6   6   39.90    1.90
   4   6  -6   39.90    1.80
   4  -6   6   40.60    1.90
  -4   8  -8   28.20    1.80
  -4  -8   8   27.70    1.90
   4  -8   8   31.40    1.90
   4  -8   8   27.10    1.80
   4   8  -8   28.10    1.70
   4  -8   8   31.10    1.80
  -4 -10  10   43.90    2.40
  -4 -10  10   47.20    2.50
  -4  10 -10   46.50    2.40
   4 -10  10   45.20    2.40
   4 -10  10   41.50    2.40
   4 -10  10   41.40    2.50
   4  10 -10   43.80    2.30
  -4 -12  12   32.20    2.20
  -4 -12  12   30.50    2.10
  -4  12 -12   35.40    2.20
   4 -12  12   34.60    2.20
   4 -12  12   32.50    2.30
   4  12 -12   30.30    2.00
   4 -12  12   32.30    2.20
  -4 -14  14   17.00    1.90
  -4 -14  14   14.10    1.80
  -4  14 -14   17.60    1.90
   4  14 -14   16.00    1.70
   4 -14  14   17.30    2.00
   4 -14  14   15.40    2.00
   4 -14  14   14.00    1.70
  -4  16 -16    3.70    1.20
  -4 -16  16    1.70    1.20
  -4 -16  16    2.20    1.20
   4 -16  16    2.90    1.30
   4 -16  16    2.30    1.10
   4  16 -16    1.90    1.10
   4 -16  16    0.60    1.10
  -4  18 -18   -1.10    1.00
  -4 -18  18    2.10    1.30
  -4 -18  18    0.70    1.20
   4 -18  18    0.10    1.30
   4 -18  18    0.70    1.10
   4 -18  18   -0.30    1.20
   4  18 -18   -1.10    1.00
  -4 -20  20    0.30    1.30
  -4  20 -20    2.00    1.40
   4 -20  20    0.40    1.20
   4 -20  20    1.60    1.40
   4  20 -20    0.80    1.30
   4 -20  20   -0.30    1.40
  -4  22 -22    5.50    1.90
  -4 -22  22    7.10    1.90
   4 -22  22    5.10    1.80
   4  22 -22    7.10    1.90
   4 -22  22    4.20    1.90
  -4  24 -24   -2.20    1.40
   4  24 -24    0.30    1.60
   4 -24  24    0.30    1.60
  -4  26 -26    1.60    1.90
   4  26 -26   -0.50    1.70
   4 -26  26    2.30    2.00
  -5  -1   1    0.30    0.40
  -5   1  -1    0.40    0.30
   5  -1   1    0.60    0.40
   5   1  -1    0.30    0.30
   5   1  -1    0.30    0.30
   5  -1   1    0.70    0.40
   5  -1   1    0.30    0.20
  -5  -3   3   12.20    1.10
  -5   3  -3   10.40    0.60
   5   3  -3   11.70    0.80
   5  -3   3   11.10    0.80
   5  -3   3   11.10    0.90
   5   3  -3   10.70    0.80
   5  -3   3   10.70    1.00
  -5   5  -5   22.00    1.40
  -5  -5   5   26.00    1.50
   5   5  -5   23.60    1.30
   5  -5   5   24.40    1.40
   5  -5   5   25.40    1.40
   5  -5   5   23.80    1.40
  -5  -7   7    1.90    0.80
  -5   7  -7    2.40    0.80
   5   7  -7    2.80    0.70
   5  -7   7    4.10    0.90
   5  -7   7    2.60    0.80
   5  -7   7    2.40    0.70
  -5   9  -9   35.90    2.10
  -5  -9   9   35.60    2.30
   5  -9   9   32.10    2.10
   5  -9   9   33.10    2.10
   5  -9   9   34.90    2.10
   5   9  -9   30.90    1.90
  -5 -11  11    0.90    0.90
  -5  11 -11    0.90    0.80
   5  11 -11    0.40    0.70
   5 -11  11    1.30    0.90
   5 -11  11    0.70    0.80
   5 -11  11    1.00    0.80
  -5  13 -13   91.19    4.00
  -5 -13  13   84.39    4.00
   5  13 -13   85.49    3.80
   5 -13  13   90.49    4.00
   5 -13  13   82.59    4.10
   5 -13  13   79.39    3.90
  -5  15 -15    9.70    1.60
  -5 -15  15   11.80    1.80
   5  15 -15   10.90    1.60
   5 -15  15    8.90    1.60
   5 -15  15   11.20    1.70
   5 -15  15   12.30    1.90
  -5  17 -17    0.00    0.90
  -5 -17  17    0.20    1.10
   5 -17  17    0.70    1.20
   5  17 -17   -1.60    0.90
   5 -17  17   -0.10    1.00
   5 -17  17   -2.10    0.90
  -5 -19  19    3.60    1.50
  -5  19 -19    1.70    1.20
   5 -19  19    2.70    1.50
   5  19 -19    4.40    1.50
   5 -19  19    5.50    1.60
   5 -19  19    4.30    1.60
  -5  21 -21    7.90    1.90
   5 -21  21    9.50    2.30
   5 -21  21    6.50    1.90
   5  21 -21    9.60    2.00
   5 -21  21    4.10    1.60
  -5  23 -23    2.70    1.60
   5 -23  23    1.10    1.50
   5  23 -23    0.70    1.50
   5 -23  23    0.20    1.70
  -5  25 -25    1.30    1.70
   5  25 -25    2.60    1.80
   5 -25  25    0.00    1.70
  -6   0   0    0.40    0.40
   6   0   0    0.00    0.20
   6   0   0   -0.30    0.40
   6   0   0   -0.50    0.30
  -6  -2   2   22.40    1.40
  -6   2  -2   24.60    1.20
   6   2  -2   24.30    1.10
   6  -2   2   24.00    1.10
   6   2  -2   25.10    1.30
   6  -2   2   23.00    1.30
  -6   4  -4  107.69    3.50
  -6  -4   4  109.89    4.10
   6  -4   4  108.89    3.80
   6   4  -4  110.69    3.90
   6   4  -4  103.99    3.70
   6  -4   4  110.79    3.90
   6  -4   4  109.39    4.00
  -6   6  -6  150.08    5.30
  -6   6  -6  149.79    4.80
  -6  -6   6  152.58    5.50
   6   6  -6  147.39    5.10
   6  -6   6  149.19    5.20
   6  -6   6  145.49    5.30
   6  -6   6  147.89    5.30
  -6  -8   8    4.70    1.00
  -6   8  -8    4.20    0.90
   6   8  -8    4.70    0.90
   6  -8   8    3.90    1.00
   6  -8   8    5.10    1.10
   6  -8   8    5.10    1.00
  -6  10 -10   18.50    1.80
  -6 -10  10   18.60    1.80
   6 -10  10   16.40    1.70
   6  10 -10   18.40    1.50
   6 -10  10   17.00    1.70
   6 -10  10   16.50    1.70
  -6 -12  12   17.90    1.90
  -6  12 -12   15.30    1.70
   6 -12  12   17.70    1.90
   6 -12  12   16.60    1.90
   6 -12  12   18.10    1.90
   6  12 -12   17.40    1.70
  -6 -14  14   11.70    1.80
  -6  14 -14   10.20    1.50
   6 -14  14    9.50    1.50
   6 -14  14   11.00    1.80
   6  14 -14   11.50    1.60
   6 -14  14   12.80    1.80
  -6 -16  16    0.10    1.10
  -6  16 -16   -0.30    1.00
   6  16 -16    0.30    1.10
   6 -16  16    1.70    1.30
   6 -16  16    0.70    1.00
   6 -16  16    0.60    1.10
  -6 -18  18   -0.30    1.20
  -6  18 -18    0.00    1.00
   6  18 -18    1.90    1.30
   6 -18  18    0.00    1.30
   6 -18  18    1.90    1.40
   6 -18  18    0.00    1.20
  -6  20 -20    0.30    1.10
  -6 -20  20    1.30    1.40
   6 -20  20    0.40    1.50
   6  20 -20   -0.30    1.20
   6 -20  20    2.00    1.40
   6 -20  20   -0.10    1.40
  -6  22 -22   -0.90    1.30
   6 -22  22    2.60    1.50
   6 -22  22   -2.80    1.20
   6  22 -22    1.60    1.60
   6 -22  22    1.50    1.70
  -6  24 -24   -0.60    1.50
   6 -24  24    0.30    1.80
   6 -24  24    0.80    1.60
   6  24 -24    0.60    1.80
  -7  -1   1   40.30    2.00
  -7   1  -1   42.20    1.90
   7  -1   1   42.00    1.90
   7   1  -1   41.50    1.90
   7  -1   1   41.40    1.60
   7  -1   1   39.90    1.90
   7   1  -1   41.80    1.60
  -7  -3   3    0.00    0.50
  -7   3  -3    0.90    0.40
   7  -3   3    2.40    0.70
   7   3  -3    1.30    0.50
   7  -3   3    1.20    0.50
   7  -3   3    1.30    0.40
   7   3  -3    1.10    0.40
  -7   5  -5   17.70    1.00
  -7  -5   5   21.30    1.60
   7   5  -5   19.80    1.40
   7  -5   5   20.60    1.30
   7   5  -5   21.40    1.30
   7  -5   5   21.00    1.50
   7  -5   5   19.40    1.40
  -7  -7   7   21.90    1.80
  -7   7  -7   19.80    1.60
   7  -7   7   18.60    1.80
   7  -7   7   18.10    1.60
   7   7  -7   18.00    1.50
   7  -7   7   21.30    1.50
  -7  -9   9    1.70    0.90
  -7   9  -9    2.50    0.80
   7  -9   9    1.00    0.80
   7  -9   9    3.40    1.00
   7  -9   9    3.30    0.90
   7   9  -9    1.40    0.70
  -7  11 -11    0.30    0.70
  -7 -11  11   -0.80    0.70
   7  11 -11    1.90    0.80
   7 -11  11    0.40    0.80
   7 -11  11   -0.40    0.60
   7 -11  11   -0.20    0.70
  -7 -13  13   49.10    3.00
  -7  13 -13   47.10    2.90
   7 -13  13   43.30    2.80
   7 -13  13   43.70    2.90
   7 -13  13   47.90    2.90
   7  13 -13   50.79    2.70
  -7 -15  15    3.30    1.40
  -7  15 -15    5.00    1.20
   7 -15  15    4.70    1.30
   7 -15  15    3.20    1.30
   7 -15  15    5.70    1.60
   7  15 -15    8.30    1.50
  -7 -17  17   -1.40    1.20
  -7  17 -17   -0.60    1.00
   7  17 -17    0.10    1.10
   7 -17  17   -0.30    1.20
   7 -17  17    1.00    1.20
   7 -17  17    3.20    1.50
  -7 -19  19    1.00    1.30
  -7  19 -19    1.10    1.30
   7 -19  19    2.40    1.50
   7 -19  19    0.50    1.10
   7 -19  19    2.80    1.60
   7  19 -19    2.90    1.50
  -7  21 -21    5.60    1.60
  -7 -21  21   12.50    2.40
   7 -21  21    4.70    1.70
   7 -21  21    8.10    2.10
   7 -21  21   10.80    2.30
   7  21 -21    5.90    1.90
  -7  23 -23    5.40    1.90
   7  23 -23    3.50    1.90
   7 -23  23    4.60    1.70
   7 -23  23    2.30    2.10
   7 -23  23    8.10    2.30
  -7  25 -25    1.70    1.80
   7 -25  25    2.30    2.00
   7  25 -25    0.60    1.80
   7 -25  25   -0.70    1.40
  -8   0   0  448.46   13.70
   8   0   0  427.86   13.30
   8   0   0  440.16   13.60
   8   0   0  442.26   13.70
  -8  -2   2  231.48    7.70
  -8   2  -2  231.48    7.40
   8  -2   2  232.18    7.60
   8   2  -2  231.28    7.20
   8  -2   2  227.58    7.20
   8   2  -2  227.88    7.60
  -8  -4   4    0.00    0.70
  -8   4  -4    0.60    0.40
   8  -4   4    0.20    0.60
   8   4  -4    0.00    0.60
   8   4  -4    0.50    0.50
   8  -4   4    0.60    0.50
   8  -4   4    1.20    0.80
  -8  -6   6   21.80    1.90
  -8   6  -6   22.80    1.10
   8   6  -6   23.00    1.50
   8  -6   6   27.10    1.80
   8  -6   6   22.70    1.70
   8  -6   6   24.10    1.60
   8   6  -6   26.40    1.60
  -8   8  -8    0.70    0.70
  -8  -8   8    2.20    0.90
   8   8  -8    0.20    0.60
   8  -8   8    0.40    0.70
   8  -8   8    0.30    0.70
   8  -8   8   -0.10    0.70
  -8 -10  10    0.60    0.90
  -8  10 -10    2.20    0.90
   8 -10  10    1.90    0.80
   8  10 -10    0.50    0.70
   8 -10  10    2.10    0.90
   8 -10  10    3.50    1.00
  -8 -12  12   15.30    1.90
  -8  12 -12   13.10    1.70
   8  12 -12   14.10    1.60
   8 -12  12   11.30    1.60
   8 -12  12   11.20    1.60
   8 -12  12   14.90    1.80
  -8  14 -14   14.80    1.90
  -8 -14  14   21.00    2.30
   8 -14  14   18.40    2.20
   8  14 -14   17.40    1.90
   8 -14  14   18.30    2.10
   8 -14  14   21.60    2.30
  -8 -16  16    9.60    1.90
  -8  16 -16   11.20    1.70
   8  16 -16   15.90    2.00
   8 -16  16   10.70    1.90
   8 -16  16   10.40    1.80
   8 -16  16   15.20    2.20
  -8 -18  18    2.20    1.70
  -8  18 -18    5.50    1.50
   8 -18  18    4.50    1.50
   8  18 -18    5.70    1.60
   8 -18  18    5.90    1.80
   8 -18  18    0.50    1.30
  -8 -20  20    5.30    1.90
  -8  20 -20    5.60    1.70
   8  20 -20    5.40    1.80
   8 -20  20    8.10    1.90
   8 -20  20    5.60    1.90
   8 -20  20    6.50    2.00
  -8  22 -22   30.10    3.20
  -8 -22  22   33.50    3.60
   8 -22  22   37.80    3.80
   8 -22  22   28.70    3.50
   8 -22  22   22.10    2.80
  -8  24 -24    3.70    1.70
   8 -24  24   -1.70    1.70
   8 -24  24    1.20    1.60
   8  24 -24   -1.10    1.70
  -9   1  -1  274.57    8.90
  -9  -1   1  278.87    9.00
   9  -1   1  267.77    8.50
   9  -1   1  271.07    8.90
   9   1  -1  262.47    8.50
   9  -1   1  282.07    9.00
   9   1  -1  286.77    9.00
  -9   3  -3   21.40    1.40
  -9  -3   3   19.80    1.70
   9  -3   3   22.10    1.60
   9   3  -3   23.20    1.30
   9   3  -3   23.20    1.60
   9  -3   3   23.10    1.30
  -9  -5   5    0.30    0.80
  -9   5  -5    0.60    0.50
   9  -5   5    0.40    0.70
   9  -5   5    0.60    0.50
   9   5  -5    0.60    0.70
   9  -5   5    1.50    0.80
   9   5  -5    1.00    0.50
  -9   7  -7  173.98    5.60
  -9  -7   7  179.18    6.70
  -9   7  -7  188.68    6.50
   9  -7   7  173.98    6.50
   9   7  -7  179.68    6.30
   9   7  -7  170.98    6.10
   9  -7   7  179.68    6.30
   9  -7   7  181.78    6.50
  -9  -9   9   15.80    1.90
  -9   9  -9   15.80    1.70
   9  -9   9   11.60    1.40
   9   9  -9   12.40    1.40
   9  -9   9   13.40    1.60
   9  -9   9   15.80    1.70
  -9 -11  11   13.20    1.80
  -9  11 -11   12.60    1.70
   9 -11  11   10.20    1.50
   9 -11  11   14.90    1.80
   9 -11  11   11.60    1.50
   9  11 -11   15.00    1.60
  -9 -13  13   34.70    2.70
  -9  13 -13   29.20    2.40
   9  13 -13   30.80    2.30
   9 -13  13   32.70    2.60
   9 -13  13   32.00    2.50
   9 -13  13   33.30    2.60
  -9  15 -15   -0.30    1.00
  -9 -15  15   -0.90    1.20
   9 -15  15    0.70    1.10
   9  15 -15    0.10    1.10
   9 -15  15    0.70    1.10
   9 -15  15   -0.30    1.10
  -9  17 -17    1.00    1.10
  -9 -17  17    2.90    1.60
   9 -17  17    2.30    1.30
   9  17 -17    1.90    1.30
   9 -17  17    1.10    1.40
   9 -17  17    0.30    1.20
  -9  19 -19    1.70    1.40
  -9 -19  19    4.50    1.80
   9 -19  19    1.30    1.30
   9 -19  19    1.10    1.50
   9 -19  19    1.60    1.50
   9  19 -19    3.50    1.50
  -9  21 -21    2.30    1.50
  -9 -21  21    3.90    1.80
   9 -21  21    2.20    1.60
   9 -21  21    4.20    2.00
   9 -21  21    2.70    1.50
   9  21 -21    2.20    1.80
  -9  23 -23    3.30    1.60
  -9 -23  23    0.80    1.80
   9 -23  23    1.10    1.70
   9  23 -23    3.70    1.90
   9 -23  23    1.70    1.50
   9 -23  23    5.30    2.10
 -10   0   0    0.50    0.60
  10   0   0    0.40    0.40
  10   0   0   -0.70    0.60
  10   0   0   -0.30    0.60
 -10   2  -2    2.80    0.70
 -10  -2   2    2.70    0.90
  10  -2   2    3.00    0.60
  10  -2   2    2.60    0.80
  10   2  -2    2.90    0.80
  10   2  -2    3.70    0.60
 -10   4  -4   44.30    2.10
 -10  -4   4   46.90    2.60
  10  -4   4   46.80    2.50
  10  -4   4   43.20    2.40
  10  -4   4   48.70    2.10
  10   4  -4   46.60    2.40
  10   4  -4   46.00    2.10
 -10  -6   6    4.70    1.20
 -10   6  -6    5.00    0.70
  10   6  -6    6.90    0.90
  10  -6   6    6.20    0.90
  10  -6   6    5.60    1.10
  10  -6   6    7.10    1.10
  10   6  -6    4.60    0.90
 -10  -8   8    2.50    1.00
 -10   8  -8    0.40    0.70
  10   8  -8    1.70    0.80
  10  -8   8    1.30    0.80
  10  -8   8    1.10    0.70
  10  -8   8    1.60    0.80
  10   8  -8    0.80    0.60
 -10 -10  10    5.40    1.40
 -10  10 -10    8.50    1.40
  10 -10  10    9.70    1.50
  10  10 -10    7.20    1.20
  10 -10  10    7.60    1.30
  10 -10  10    6.50    1.20
 -10 -12  12   19.60    2.30
 -10  12 -12   24.80    2.50
  10 -12  12   21.50    2.20
  10 -12  12   25.90    2.20
  10  12 -12   24.10    2.00
  10 -12  12   21.10    2.30
 -10 -14  14    7.90    1.70
 -10  14 -14   10.60    1.70
  10  14 -14   12.80    1.80
  10 -14  14    5.60    1.50
  10 -14  14    8.30    1.70
  10 -14  14    7.40    1.60
 -10  16 -16    2.20    1.30
 -10 -16  16    3.80    1.70
  10  16 -16    2.50    1.30
  10 -16  16    2.20    1.40
  10 -16  16    2.60    1.50
  10 -16  16    2.50    1.30
 -10 -18  18    0.20    1.50
 -10  18 -18    0.50    1.20
  10  18 -18   -2.70    1.10
  10 -18  18    2.20    1.60
  10 -18  18    1.00    1.40
  10 -18  18    0.70    1.20
 -10  20 -20    2.10    1.40
 -10 -20  20    1.40    1.60
  10 -20  20    1.90    1.40
  10 -20  20    3.30    1.70
  10 -20  20    1.50    1.50
  10  20 -20    2.20    1.60
 -10  22 -22    0.70    1.50
 -10 -22  22    1.60    1.70
  10 -22  22   -0.40    1.50
  10  22 -22    1.70    1.70
  10 -22  22    0.40    1.70
  10 -22  22   -0.10    1.40
 -10  24 -24   -2.20    1.30
  10  24 -24    2.20    1.90
  10 -24  24    3.00    2.00
  10 -24  24    1.60    1.60
  10 -24  24    0.60    1.90
 -11  -1   1   47.80    2.60
 -11   1  -1   43.70    2.40
  11  -1   1   52.49    2.50
  11   1  -1   50.39    2.00
  11   1  -1   47.20    2.50
  11  -1   1   48.00    2.00
  11   1  -1   52.59    2.50
  11  -1   1   47.00    2.50
 -11   3  -3    4.20    0.80
 -11  -3   3    4.00    1.00
  11  -3   3    4.20    0.70
  11   3  -3    4.60    1.00
  11  -3   3    3.30    0.90
  11   3  -3    5.00    0.70
 -11   5  -5   36.90    1.90
 -11  -5   5   37.60    2.40
  11  -5   5   37.80    2.20
  11  -5   5   38.00    2.00
  11   5  -5   37.30    1.90
  11  -5   5   36.90    2.30
  11   5  -5   37.90    2.20
 -11  -7   7   55.59    3.10
  11  -7   7   55.39    2.90
  11  -7   7   51.89    2.90
  11   7  -7   55.39    2.80
  11   7  -7   53.59    2.50
  11  -7   7   55.49    2.70
 -11  -9   9   14.30    1.90
 -11   9  -9   20.40    2.10
  11   9  -9   18.40    1.70
  11   9  -9   19.10    1.60
  11  -9   9   17.60    1.80
  11  -9   9   20.40    2.00
  11  -9   9   15.40    1.80
 -11 -11  11   -0.10    1.00
 -11  11 -11    1.80    1.10
  11 -11  11    0.10    0.90
  11  11 -11    0.90    0.90
  11 -11  11    0.60    0.90
  11 -11  11    1.60    1.00
  11  11 -11    0.70    0.70
 -11 -13  13    3.50    1.40
 -11  13 -13    3.60    1.30
  11 -13  13    4.20    1.30
  11 -13  13    3.40    1.40
  11  13 -13    5.30    1.40
  11 -13  13    4.10    1.40
 -11 -15  15    3.70    1.50
 -11  15 -15    4.00    1.40
  11 -15  15    2.40    1.30
  11 -15  15    2.20    1.20
  11  15 -15    7.70    1.60
  11 -15  15    5.30    1.60
 -11 -17  17    6.00    1.90
 -11  17 -17    7.70    1.70
  11 -17  17    9.20    2.00
  11 -17  17    8.20    2.00
  11 -17  17    9.10    1.90
  11  17 -17    8.80    1.90
 -11  19 -19   -0.40    1.20
 -11 -19  19    0.40    1.70
  11 -19  19    1.10    1.40
  11 -19  19   -0.50    1.50
  11 -19  19   -0.90    1.20
  11  19 -19   -1.20    1.40
 -11  21 -21    6.50    1.90
 -11 -21  21    7.50    2.40
  11  21 -21    3.80    1.80
  11 -21  21    6.30    2.20
  11 -21  21    3.30    1.70
  11 -21  21    5.20    2.00
 -11 -23  23    6.60    2.30
 -11  23 -23    0.60    1.50
  11 -23  23    1.60    2.00
  11 -23  23    0.10    1.50
  11 -23  23    1.30    1.70
  11  23 -23    3.40    1.90
 -12   0   0  249.48    8.80
  12   0   0  271.37    8.90
  12   0   0  265.07    8.80
  12   0   0  248.18    8.20
 -12  -2   2   32.90    2.20
 -12   2  -2   32.20    2.00
  12   2  -2   32.80    1.60
  12  -2   2   35.50    2.10
  12  -2   2   31.80    1.60
  12   2  -2   33.80    2.10
 -12  -4   4    3.40    1.00
 -12   4  -4    2.70    0.70
  12   4  -4    2.20    0.60
  12  -4   4    3.30    0.90
  12   4  -4    1.50    0.80
  12  -4   4    2.00    1.00
  12  -4   4    2.80    0.70
 -12   6  -6    5.60    0.80
 -12  -6   6    6.70    1.40
  12  -6   6    5.90    1.00
  12  -6   6    7.30    1.30
  12   6  -6    5.90    0.90
  12   6  -6    6.50    1.20
  12  -6   6    4.40    1.10
 -12  -8   8   39.20    2.70
  12  -8   8   34.50    2.40
  12  -8   8   39.30    2.50
  12   8  -8   33.30    2.00
  12  -8   8   38.70    2.30
  12   8  -8   39.40    2.40
 -12 -10  10   10.60    1.80
 -12  10 -10   13.90    1.80
  12 -10  10    9.30    1.40
  12  10 -10   10.50    1.40
  12  10 -10    9.40    1.50
  12 -10  10   12.10    1.70
  12 -10  10    6.70    1.50
 -12 -12  12   14.40    2.10
 -12  12 -12   10.80    1.80
  12  12 -12   14.90    1.70
  12 -12  12    9.70    1.80
  12 -12  12   14.40    2.00
  12  12 -12   12.00    1.80
  12 -12  12   11.20    1.70
 -12  14 -14    7.20    1.60
 -12 -14  14    9.80    2.00
  12 -14  14   13.00    2.20
  12  14 -14   13.90    2.00
  12 -14  14   12.00    2.10
  12 -14  14    8.50    1.70
  12  14 -14   12.40    1.70
 -12  16 -16   -0.20    1.10
 -12 -16  16    2.40    1.60
  12 -16  16   -1.00    1.10
  12  16 -16    0.50    1.40
  12 -16  16   -0.80    1.20
  12 -16  16   -0.20    1.20
 -12  18 -18    0.10    1.20
 -12 -18  18    3.00    1.90
  12  18 -18    1.20    1.40
  12 -18  18    0.80    1.60
  12 -18  18    2.40    1.40
  12 -18  18   -0.20    1.20
 -12  20 -20   -2.00    1.10
 -12 -20  20    2.10    1.80
  12  20 -20    0.20    1.60
  12 -20  20    0.80    1.40
  12 -20  20   -0.50    1.40
  12 -20  20    0.30    1.60
 -12  22 -22    0.90    1.50
 -12 -22  22    7.90    2.30
  12 -22  22    0.30    1.60
  12  22 -22    1.30    1.80
  12 -22  22    1.80    1.90
  12 -22  22   -0.80    1.40
 -13  -1   1    9.50    1.40
 -13   1  -1   10.00    1.30
  13   1  -1    8.50    1.30
  13   1  -1    9.80    1.40
  13  -1   1    9.90    1.00
  13  -1   1   10.40    1.40
  13   1  -1    8.00    0.90
 -13   3  -3    5.50    1.00
 -13  -3   3    6.00    1.20
  13  -3   3    5.50    0.80
  13   3  -3    7.30    0.90
  13  -3   3    5.60    1.10
  13   3  -3    5.40    1.10
 -13  -5   5    0.50    0.90
 -13   5  -5    0.60    0.60
  13  -5   5    1.00    0.90
  13  -5   5    1.20    0.60
  13  -5   5    0.40    0.80
  13   5  -5    0.90    0.80
  13   5  -5   -0.10    0.50
 -13  -7   7    4.20    1.30
  13  -7   7    4.80    1.30
  13  -7   7    4.30    1.10
  13   7  -7    5.00    0.90
  13   7  -7    5.00    1.20
  13  -7   7    5.70    1.10
 -13  -9   9   19.50    2.30
 -13   9  -9   15.70    2.00
  13  -9   9   16.60    1.80
  13  -9   9   13.30    1.80
  13   9  -9   16.70    1.60
  13  -9   9   16.50    2.00
  13   9  -9   15.90    1.90
 -13  11 -11   -0.60    0.90
 -13 -11  11    1.20    1.20
  13 -11  11    0.50    1.10
  13 -11  11    0.10    1.00
  13 -11  11    0.30    1.00
  13  11 -11   -0.20    0.70
  13  11 -11    0.70    1.00
 -13 -13  13   12.20    2.10
 -13  13 -13   15.70    2.20
  13  13 -13   11.70    1.90
  13 -13  13   16.00    2.20
  13 -13  13   13.50    2.10
  13  13 -13   15.00    1.80
  13 -13  13   14.90    2.10
 -13 -15  15   -0.10    1.40
 -13  15 -15    2.40    1.40
  13 -15  15    1.40    1.30
  13  15 -15    2.60    1.40
  13 -15  15    1.20    1.30
  13  15 -15    1.80    1.20
  13 -15  15    2.40    1.50
 -13 -17  17    5.70    2.10
 -13  17 -17    3.70    1.60
  13 -17  17    5.20    1.60
  13  17 -17    0.50    1.40
  13  17 -17    3.70    1.30
  13 -17  17    0.70    1.40
  13 -17  17    2.40    1.60
 -13  19 -19    0.30    1.30
 -13 -19  19    3.70    2.10
  13  19 -19    2.90    1.40
  13 -19  19    3.10    1.80
  13 -19  19    2.20    1.60
  13 -19  19    1.50    1.50
  13  19 -19    2.10    1.60
 -13 -21  21    4.60    2.20
 -13  21 -21    1.80    1.50
  13 -21  21    1.20    1.70
  13 -21  21    1.50    1.60
  13 -21  21    0.30    1.80
  13  21 -21   -0.50    1.70
  13  21 -21    0.60    1.30
 -14   0   0   -0.30    0.70
  14   0   0    0.40    0.80
  14   0   0    0.30    0.40
  14   0   0    0.70    0.70
 -14  -2   2    0.20    0.80
 -14   2  -2    0.90    0.70
  14   2  -2    0.80    0.70
  14   2  -2    1.40    0.90
  14   2  -2    1.00    0.50
  14  -2   2   -0.60    0.70
  14  -2   2    0.40    0.50
 -14   4  -4    8.70    1.20
 -14  -4   4    8.80    1.50
  14   4  -4    7.50    1.30
  14   4  -4    5.50    0.80
  14  -4   4    5.70    1.20
  14  -4   4    6.10    1.00
  14  -4   4    5.70    1.30
 -14  -6   6   15.00    2.00
  14   6  -6   16.70    1.40
  14  -6   6   15.80    1.90
  14   6  -6   20.10    2.10
  14  -6   6   18.10    1.70
  14  -6   6   15.10    1.90
 -14  -8   8    0.10    1.00
  14  -8   8    2.20    1.10
  14  -8   8    0.70    0.80
  14   8  -8   -1.20    0.60
  14   8  -8   -0.20    0.90
  14  -8   8    0.50    0.90
 -14  10 -10    0.70    1.10
 -14 -10  10    1.80    1.30
  14 -10  10    2.50    1.20
  14 -10  10    4.10    1.20
  14  10 -10    2.30    1.20
  14 -10  10    1.30    1.20
  14  10 -10    1.70    0.90
 -14  12 -12    4.10    1.50
 -14 -12  12    4.20    1.70
  14  12 -12    4.00    1.40
  14  12 -12    4.50    1.20
  14 -12  12    6.00    1.50
  14 -12  12    3.20    1.30
  14 -12  12    5.70    1.50
 -14  14 -14    9.70    1.90
 -14 -14  14    2.10    1.60
  14 -14  14    4.80    1.80
  14 -14  14    5.90    1.70
  14 -14  14    4.60    1.50
  14  14 -14    5.40    1.60
  14  14 -14    5.20    1.40
 -14  16 -16   -1.20    1.10
 -14 -16  16   -0.50    1.50
  14 -16  16   -1.40    1.20
  14  16 -16    1.20    1.40
  14  16 -16    1.60    1.10
  14 -16  16   -0.30    1.20
  14 -16  16   -0.90    1.30
 -14  18 -18    0.10    1.30
 -14 -18  18    1.30    1.90
  14 -18  18    1.10    1.30
  14 -18  18    0.80    1.50
  14 -18  18    1.60    1.50
  14  18 -18    2.80    1.70
  14  18 -18    1.50    1.20
 -14 -20  20    3.00    2.10
 -14  20 -20    2.80    1.50
  14  20 -20    0.00    1.30
  14 -20  20    0.40    1.60
  14  20 -20    0.60    1.80
  14 -20  20    3.00    1.90
  14 -20  20    0.10    1.40
  14 -22  22    3.00    1.80
 -15  -1   1   35.60    2.60
 -15   1  -1   36.30    2.40
  15  -1   1   34.40    2.40
  15   1  -1   37.10    2.50
  15   1  -1   41.10    2.60
 -15   3  -3    0.20    0.70
 -15  -3   3    0.00    0.90
  15   3  -3    0.90    0.90
  15  -3   3    1.00    0.90
 -15  -5   5    1.60    1.20
  15   5  -5    2.30    1.00
  15  -5   5    1.50    1.00
  15  -5   5    3.90    1.20
 -15  -7   7    3.70    1.40
  15  -7   7    3.60    1.20
  15  -7   7    2.50    1.10
  15   7  -7    5.30    1.40
 -15   9  -9    2.20    1.20
 -15  -9   9    1.60    1.20
  15  -9   9    0.90    1.20
  15   9  -9    2.60    1.30
  15  -9   9    2.70    1.20
 -15  11 -11   -0.10    1.00
 -15 -11  11   -0.10    1.40
  15 -11  11    0.20    1.20
  15  11 -11    1.10    1.20
  15 -11  11    0.40    1.00
 -15 -13  13    4.70    1.80
 -15  13 -13    3.20    1.40
  15  13 -13    3.90    1.50
  15 -13  13    4.70    1.50
  15 -13  13    3.50    1.60
 -15  15 -15   19.70    2.50
 -15 -15  15   16.40    2.70
  15  15 -15   14.50    2.20
  15 -15  15   12.90    2.20
  15 -15  15   14.40    2.40
 -15  17 -17   -1.70    1.20
 -15 -17  17   -0.60    1.70
  15  17 -17   -1.80    1.30
  15 -17  17   -1.70    1.30
  15 -17  17    0.00    1.30
 -15  19 -19    2.10    1.60
 -15 -19  19   -0.70    1.80
  15  19 -19    0.80    1.80
  15 -19  19    3.00    1.70
  15 -19  19    0.40    1.70
 -15  21 -21   -0.40    1.30
 -15 -21  21    1.70    2.00
  15 -21  21    0.00    1.50
  15  21 -21   -0.30    1.80
 -16   0   0  319.17   11.50
  16   0   0  350.56   11.70
  16   0   0  331.27   11.50
 -16  -2   2   -0.60    0.90
 -16   2  -2    2.00    1.00
  16  -2   2   -0.30    1.00
  16   2  -2   -0.40    0.90
  16   2  -2    3.30    1.20
 -16  -4   4   -0.40    1.00
  16  -4   4   -0.10    1.00
  16  -4   4   -0.40    0.90
  16   4  -4    0.60    0.90
 -16  -6   6   46.80    3.50
  16  -6   6   48.60    3.20
  16   6  -6   50.99    3.10
  16  -6   6   50.29    3.20
 -16  -8   8    1.50    1.40
  16  -8   8   -0.10    1.00
  16   8  -8    0.30    1.00
  16  -8   8   -0.70    1.00
 -16 -10  10    3.10    1.60
 -16  10 -10    5.00    1.50
  16  10 -10    1.90    1.40
  16 -10  10    2.40    1.40
  16 -10  10    0.90    1.20
 -16 -12  12   -0.20    1.50
 -16  12 -12    0.20    1.20
  16 -12  12   -0.60    1.20
  16 -12  12    1.30    1.30
  16  12 -12    1.60    1.30
 -16 -14  14    9.10    2.30
 -16  14 -14   10.40    2.10
  16  14 -14   16.10    2.30
  16 -14  14    6.60    1.90
  16 -14  14   15.50    2.40
 -16  16 -16    2.50    1.60
 -16 -16  16    0.40    1.70
  16 -16  16    0.20    1.40
  16  16 -16    0.50    1.60
  16 -16  16   -1.40    1.20
 -16 -18  18   -0.30    2.00
 -16  18 -18   -0.30    1.30
  16 -18  18    0.30    1.60
  16 -18  18   -1.00    1.20
  16  18 -18   -0.40    1.60
 -16  20 -20    6.10    1.90
 -16 -20  20    4.70    2.40
  16 -20  20    6.30    2.20
  16  20 -20    3.10    1.90
 -17  -1   1   29.20    2.50
 -17   1  -1   26.80    2.40
  17  -1   1   26.30    2.50
  17   1  -1   29.00    2.40
  17   1  -1   30.60    2.80
 -17  -3   3    5.00    1.50
 -17   3  -3    3.60    1.20
  17  -3   3    5.50    1.50
  17  -3   3    8.60    1.70
  17   3  -3    5.50    1.40
  17   3  -3    5.20    1.30
 -17  -5   5    1.40    1.30
  17  -5   5    2.70    1.30
  17   5  -5    0.40    1.00
  17  -5   5    0.30    1.00
 -17  -7   7    5.30    1.70
  17  -7   7    4.10    1.40
  17  -7   7    7.50    1.70
  17   7  -7    7.00    1.70
 -17   9  -9   -0.40    1.10
 -17  -9   9    3.60    1.60
  17  -9   9    0.10    1.10
  17   9  -9    2.40    1.30
  17  -9   9    0.10    1.30
 -17 -11  11    0.80    1.60
 -17  11 -11    0.60    1.20
  17 -11  11   -1.00    1.00
  17  11 -11    0.60    1.20
  17 -11  11   -0.20    1.20
 -17  13 -13    1.30    1.40
 -17 -13  13    0.30    1.70
  17 -13  13    2.50    1.40
  17 -13  13   -0.20    1.40
  17  13 -13    1.40    1.50
 -17 -15  15    1.10    2.00
 -17  15 -15    4.00    1.60
  17  15 -15    2.30    1.60
  17 -15  15    1.00    1.60
  17 -15  15    2.80    1.50
 -17 -17  17   -0.70    1.90
 -17  17 -17    1.00    1.40
  17 -17  17    0.50    1.30
  17 -17  17    0.10    1.60
  17  17 -17    1.20    1.70
 -17 -19  19    0.20    2.00
 -17  19 -19    0.00    1.40
  17  19 -19   -0.60    1.80
  17 -19  19    1.60    1.70
 -18   0   0    5.20    1.30
  18   0   0    4.20    1.40
 -18  -2   2    9.00    1.80
 -18   2  -2   11.10    1.70
  18   2  -2    8.70    1.80
  18  -2   2    8.20    1.70
  18   2  -2   10.70    1.80
 -18  -4   4    6.30    1.70
  18  -4   4   10.60    2.00
  18  -4   4    8.50    1.70
  18   4  -4    5.50    1.40
  18   4  -4    9.80    1.90
 -18  -6   6    0.40    1.30
  18  -6   6    2.10    1.30
  18  -6   6    3.70    1.40
  18   6  -6    3.10    1.40
 -18  -8   8   -0.60    1.40
  18  -8   8   -0.50    1.00
  18  -8   8    0.50    1.20
  18   8  -8    0.90    1.40
 -18  10 -10    0.40    1.20
 -18 -10  10    1.00    1.70
  18 -10  10    0.50    1.20
  18 -10  10    1.40    1.50
  18  10 -10    2.30    1.40
 -18  12 -12   13.10    2.20
 -18 -12  12   11.10    2.60
  18 -12  12    8.50    2.10
  18  12 -12    7.70    1.90
  18 -12  12    3.10    1.50
 -18 -14  14    3.80    2.10
 -18  14 -14    4.70    1.60
  18  14 -14    2.10    1.70
  18 -14  14    5.60    2.00
  18 -14  14    1.50    1.40
 -18  16 -16    0.60    1.50
 -18 -16  16   -1.60    2.00
  18 -16  16    1.80    1.60
  18 -16  16   -0.50    1.60
  18  16 -16   -0.40    1.60
 -18 -18  18    1.10    2.20
 -18  18 -18    3.20    1.70
  18 -18  18    0.80    1.60
  18  18 -18    5.10    2.10
 -19   1  -1   49.00    3.30
 -19  -1   1   48.10    3.40
  19  -1   1   55.29    3.50
  19   1  -1   51.99    3.40
  19   1  -1   48.00    3.40
 -19  -3   3   -0.30    1.10
  19   3  -3   -0.80    1.20
  19  -3   3    2.10    1.30
  19   3  -3   -1.10    1.00
  19  -3   3   -0.90    1.00
 -19  -5   5   -0.10    1.30
  19  -5   5    0.20    1.10
  19   5  -5    0.10    1.20
  19  -5   5   -0.30    1.10
  19   5  -5    1.00    1.10
 -19  -7   7   15.70    2.60
  19  -7   7   17.10    2.60
  19   7  -7   17.50    2.40
  19  -7   7   15.70    2.30
 -19  -9   9    1.80    1.90
  19   9  -9    5.00    1.70
  19  -9   9    1.20    1.40
  19  -9   9    4.80    1.60
 -19 -11  11    3.20    2.00
 -19  11 -11    1.50    1.40
  19 -11  11    1.20    1.40
  19 -11  11    0.60    1.30
  19  11 -11    0.40    1.40
 -19 -13  13    0.30    2.00
 -19  13 -13   -1.10    1.20
  19 -13  13   -0.10    1.50
  19 -13  13   -0.60    1.30
  19  13 -13    0.50    1.50
 -19  15 -15   -1.40    1.20
 -19 -15  15   -0.60    2.00
  19 -15  15   -1.10    1.40
  19 -15  15    0.00    1.60
  19  15 -15    0.00    1.60
 -19  17 -17    2.80    1.70
 -19 -17  17    0.50    2.20
  19  17 -17    4.40    2.00
  19 -17  17    3.10    1.80
 -20   0   0   49.50    3.60
  20   0   0   53.59    3.60
 -20  -2   2   25.50    2.90
  20  -2   2   27.50    3.10
  20  -2   2   25.60    2.80
  20   2  -2   24.20    2.70
  20   2  -2   26.10    3.00
 -20  -4   4   -2.00    1.40
  20  -4   4   -1.70    1.00
  20   4  -4    0.00    1.10
  20   4  -4   -0.80    1.20
  20  -4   4   -0.20    1.10
 -20  -6   6    4.30    1.90
  20  -6   6    5.00    1.60
  20   6  -6    3.90    1.70
  20  -6   6    5.40    1.80
 -20  -8   8    2.80    2.00
  20  -8   8   -0.30    1.30
  20  -8   8    0.90    1.30
  20   8  -8    2.00    1.50
 -20  10 -10    8.00    1.90
 -20 -10  10    6.50    2.40
  20 -10  10    2.90    1.70
  20  10 -10    6.30    1.90
  20 -10  10    5.00    1.80
 -20  12 -12   -0.90    1.20
 -20 -12  12    2.50    2.20
  20  12 -12    2.70    1.80
  20 -12  12    1.20    1.60
  20 -12  12    1.10    1.40
 -20  14 -14    1.50    1.50
 -20 -14  14    0.40    2.00
  20  14 -14    3.60    1.90
  20 -14  14    0.20    1.40
  20 -14  14   -1.40    1.50
  20 -16  16   -3.40    1.20
 -21  -1   1   12.00    2.20
  21   1  -1   12.80    2.10
  21  -1   1   15.70    2.30
 -21  -3   3    9.20    2.20
  21  -3   3    4.30    1.80
  21   3  -3    5.40    1.70
  21   3  -3    3.70    1.70
  21  -3   3    4.40    1.70
 -21  -5   5    0.40    1.70
  21  -5   5   -0.10    1.30
  21   5  -5    3.60    1.60
  21  -5   5    2.90    1.50
  21   5  -5    1.70    1.50
 -21  -7   7    7.90    2.30
  21  -7   7    6.60    2.00
  21   7  -7    4.90    1.80
  21  -7   7    3.20    1.60
 -21  -9   9   12.70    2.90
 -21   9  -9   10.20    2.10
  21  -9   9    5.10    1.70
  21   9  -9    6.80    1.90
  21  -9   9   11.20    2.30
 -21  11 -11    0.70    1.30
 -21 -11  11    1.20    2.30
  21 -11  11   -0.30    1.30
  21  11 -11    0.40    1.80
  21 -11  11   -1.20    1.20
 -21 -13  13    3.80    2.40
 -21  13 -13    2.60    1.70
  21 -13  13    4.50    2.40
  21 -13  13    2.70    1.60
  22   0   0    0.00    1.30
 -22  -2   2    0.40    1.50
  22  -2   2    1.60    1.30
  22  -2   2    2.50    1.50
  22   2  -2    1.60    1.40
 -22  -4   4   13.70    2.80
  22  -4   4    5.70    1.80
  22   4  -4   11.60    2.30
  22  -4   4   11.10    2.30
  22   4  -4    7.20    1.90
 -22  -6   6    1.40    2.00
  22   6  -6    0.30    1.60
  22  -6   6   -0.20    1.30
  22   6  -6   -0.80    1.20
  22  -6   6   -0.10    1.30
 -22  -8   8    2.00    2.00
  22  -8   8    4.40    1.80
  22  -8   8    2.20    1.50
 -22  10 -10    3.10    1.60
 -22 -10  10    0.00    2.20
  22 -10  10    2.20    1.60
  22 -10  10    1.60    1.50
 -22  12 -12    1.00    1.50
 -22 -12  12   -1.10    2.10
  22 -12  12    2.20    1.60
  23  -1   1    8.50    2.10
  23   1  -1   10.70    2.30
  23  -1   1   11.70    2.40
 -23  -3   3    4.20    2.00
  23  -3   3    7.10    2.10
  23   3  -3    4.60    1.70
  23  -3   3    5.50    1.80
 -23  -5   5   -0.20    1.90
  23  -5   5   -0.20    1.20
  23  -5   5    0.60    1.50
  23   5  -5   -1.00    1.20
 -23  -7   7    6.70    2.50
  23  -7   7    1.60    1.50
  23  -7   7    1.00    1.70
  23   7  -7    2.20    1.50
 -23  -9   9    3.80    2.40
 -23   9  -9   -2.30    1.20
  23  -9   9    1.50    1.50
  24   0   0   19.70    2.80
  24  -2   2    6.90    2.00
  24  -2   2    4.80    2.00
  24   2  -2    4.60    1.90
 -24  -4   4   -3.00    1.90
  24  -4   4    0.80    1.50
  24   4  -4   -0.40    1.40
  24  -4   4   -2.10    1.20
 -24  -6   6   -0.70    2.10
  24  -6   6    0.70    1.50
  24   6  -6    0.90    1.50
  25  -1   1   -1.00    1.40
  25   1  -1   -0.30    1.30
   0 -26  24    4.50    2.00
   0  26 -24   -0.20    1.60
   0  24 -22   -0.90    1.40
   0 -24  22   -2.10    1.20
   0  22 -20   -0.40    1.40
   0 -22  20   -1.60    1.30
   0 -20  18    1.30    1.40
   0  20 -18   -0.40    1.10
   0 -18  16    1.00    1.20
   0  18 -16    0.80    1.00
   0 -18  16   -1.50    0.90
   0 -16  14    1.10    1.00
   0 -16  14   -0.40    0.90
   0  16 -14    0.60    0.90
   0 -16  14   -0.20    0.70
   0  14 -12    0.30    0.70
   0 -14  12    0.10    0.80
   0 -14  12    0.80    0.80
   0 -14  12    0.00    0.60
   0  12 -10   -1.00    0.60
   0 -12  10    0.10    0.80
   0 -12  10   -0.10    0.70
   0 -12  10    0.00    0.60
   0 -10   8   -0.80    0.60
   0 -10   8   -0.10    0.60
   0 -10   8   -0.90    0.70
   0 -10   8   -0.30    0.60
   0  10  -8    1.00    0.70
   0  -8   6    0.30    0.50
   0  -8   6    1.10    0.50
   0  -8   6    0.20    0.40
   0  -8   6   -0.20    0.40
   0   8  -6    0.50    0.50
   0  -6   4    0.30    0.40
   0  -6   4   -0.10    0.30
   0   6  -4    0.30    0.40
   0  -6   4    0.10    0.40
   0  -6   4    0.00    0.50
   0   4  -2   -0.30    0.20
   0  -4   2    0.20    0.20
   0  -4   2    0.20    0.30
   0  -4   2    0.00    0.30
   0  -4   2    0.00    0.30
   0   2   0    0.10    0.10
   0  -2   0    0.00    0.10
   0  -2   0    0.00    0.10
   0   0   2    0.00    0.10
   0   2  -4    0.20    0.20
   0  -2   4    0.00    0.30
   0  -2   4   -0.20    0.20
   0  -2   4   -0.10    0.20
   0  -4   6    0.30    0.40
   0  -4   6    0.00    0.30
   0  -4   6   -0.40    0.40
   0  -4   6    0.30    0.40
   0   4  -6    0.10    0.40
   0   6  -8    0.30    0.40
   0  -6   8   -0.20    0.50
   0  -6   8    0.40    0.50
   0  -6   8   -0.20    0.40
   0  -6   8   -0.50    0.40
   0  -8  10   -0.30    0.70
   0   8 -10    0.20    0.60
   0  -8  10   -0.70    0.60
   0  -8  10    0.40    0.60
   0  -8  10   -0.30    0.50
   0 -10  12   -0.50    0.70
   0 -10  12   -1.00    0.60
   0 -10  12   -1.60    0.80
   0  10 -12    0.30    0.70
   0 -10  12   -1.10    0.70
   0 -12  14   -0.40    0.80
   0 -12  14    0.10    0.70
   0  12 -14    0.70    0.70
   0 -12  14    0.30    0.70
   0 -12  14   -0.50    0.70
   0 -14  16   -1.40    0.80
   0  14 -16   -0.70    0.80
   0 -14  16    0.20    0.90
   0 -14  16   -0.20    0.70
   0  16 -18   -0.90    0.90
   0 -16  18   -0.20    0.90
   0 -16  18    0.50    1.20
   0 -18  20    0.10    1.20
   0  18 -20    0.50    1.20
   0 -20  22   -0.20    1.40
   0  20 -22   -0.60    1.30
   0 -22  24    1.60    1.60
   0  22 -24   -1.50    1.40
   0  24 -26   -0.30    1.60
   0 -24  26   -3.20    1.50
  -1 -27  25   -1.50    1.70
  -1  27 -25   -0.50    1.70
   1 -27  25   -0.90    1.60
   1  27 -25    1.00    1.70
  -1  25 -23    0.40    1.70
  -1 -25  23   -0.30    1.60
   1 -25  23   -0.40    1.40
   1  25 -23   -4.00    1.40
  -1  23 -21    2.10    1.50
  -1 -23  21    2.50    1.70
   1 -23  21    3.00    1.60
   1  23 -21    1.70    1.60
  -1  21 -19    6.20    1.70
  -1 -21  19    9.50    2.00
   1  21 -19    5.30    1.70
   1 -21  19    8.20    1.90
   1 -21  19   10.10    2.20
  -1 -19  17    1.70    1.30
  -1  19 -17    0.60    1.10
   1 -19  17    0.50    1.30
   1  19 -17    0.30    1.10
   1 -19  17   -0.80    1.10
  -1  17 -15    4.80    1.20
  -1 -17  15    8.70    1.80
  -1 -17  15    5.50    1.20
  -1 -17  15    6.60    1.50
   1 -17  15   10.10    1.60
   1 -17  15    7.00    1.60
   1  17 -15    3.70    1.20
  -1  15 -13   11.00    1.50
  -1 -15  13   10.10    1.70
  -1 -15  13    8.40    1.20
  -1 -15  13   10.20    1.60
   1 -15  13    7.10    1.40
   1 -15  13    6.90    1.50
   1 -15  13    8.80    1.10
   1  15 -13    7.20    1.30
   1 -15  13    7.30    1.40
  -1 -13  11    8.60    1.40
  -1 -13  11    9.10    1.20
  -1 -13  11    9.10    1.30
  -1  13 -11    8.50    1.20
   1 -13  11   11.50    1.60
   1  13 -11    8.90    1.20
   1 -13  11   10.60    1.50
   1 -13  11    9.40    1.40
   1 -13  11    8.90    1.10
  -1 -11   9   23.70    1.60
  -1 -11   9   23.00    2.10
  -1  11  -9   23.20    1.70
  -1 -11   9   19.00    1.70
   1 -11   9   19.20    1.60
   1 -11   9   21.30    2.00
   1 -11   9   19.10    1.40
   1  11  -9   21.20    1.70
   1 -11   9   23.00    1.70
  -1  -9   7   54.09    2.60
  -1   9  -7   56.29    2.40
  -1  -9   7   52.99    2.40
  -1  -9   7   53.69    2.40
   1  -9   7   56.29    2.50
   1  -9   7   60.29    2.50
   1   9  -7   52.69    2.40
   1  -9   7   54.79    2.60
   1  -9   7   50.49    2.10
  -1  -7   5   89.09    3.50
  -1  -7   5   89.69    3.70
  -1   7  -5  115.99    3.60
  -1  -7   5   92.89    3.50
   1  -7   5  106.59    3.60
   1   7  -5   89.79    3.50
   1  -7   5  105.79    3.70
   1  -7   5   95.09    3.30
   1  -7   5  110.09    3.60
  -1  -5   3  122.59    4.10
  -1  -5   3  119.09    3.90
  -1  -5   3  124.99    4.00
  -1   5  -3  116.49    4.00
   1  -5   3  123.59    4.00
   1  -5   3  119.89    4.10
   1  -5   3  115.79    3.70
   1  -5   3  123.89    4.00
   1   5  -3  120.19    4.00
  -1  -3   1  107.19    3.40
  -1  -3   1  110.39    3.40
  -1  -3   1  106.89    3.40
  -1   3  -1  105.59    3.40
   1  -3   1  112.29    3.50
   1   3  -1  105.39    3.40
   1  -3   1  106.19    3.40
   1  -3   1  105.19    3.40
  -1  -1   3   31.30    1.20
  -1  -1   3   31.80    1.20
   1   1  -3   33.40    1.10
   1  -1   3   31.80    1.20
   1  -1   3   31.60    1.20
   1  -1   3   31.20    1.20
  -1   3  -5  123.19    3.90
  -1  -3   5  118.49    3.90
  -1  -3   5  119.39    3.90
   1   3  -5  117.09    3.80
   1  -3   5  109.79    3.70
   1  -3   5  124.09    4.00
   1  -3   5  119.49    3.90
   1  -3   5  122.39    3.90
  -1  -5   7   25.40    1.30
  -1  -5   7   22.60    1.30
  -1   5  -7   23.20    1.30
  -1  -5   7   24.30    1.30
   1  -5   7   24.70    1.30
   1  -5   7   24.10    1.40
   1  -5   7   21.60    1.30
   1  -5   7   23.00    1.10
   1   5  -7   21.30    1.20
  -1  -7   9    3.20    0.70
  -1  -7   9    4.40    0.80
  -1   7  -9    3.00    0.70
  -1  -7   9    3.90    0.70
   1  -7   9    3.40    0.60
   1  -7   9    4.30    0.90
   1   7  -9    3.60    0.70
   1  -7   9    4.30    0.80
   1  -7   9    2.90    0.70
  -1  -9  11   34.10    2.00
  -1  -9  11   32.20    2.00
  -1  -9  11   31.40    1.90
  -1   9 -11   31.80    1.90
   1  -9  11   35.40    2.20
   1  -9  11   31.60    1.70
   1  -9  11   31.30    2.00
   1  -9  11   31.90    2.00
   1   9 -11   31.70    1.90
  -1 -11  13   22.10    1.70
  -1 -11  13   22.10    1.90
  -1  11 -13   21.40    1.70
   1 -11  13   23.60    1.80
   1 -11  13   19.80    1.40
   1  11 -13   19.70    1.70
   1 -11  13   19.80    2.00
   1 -11  13   21.30    1.80
  -1 -13  15    0.00    0.70
  -1 -13  15   -0.30    0.90
  -1  13 -15   -0.10    0.70
   1 -13  15   -0.70    0.80
   1  13 -15    0.10    0.70
   1 -13  15    0.40    0.80
   1 -13  15   -1.00    0.70
   1 -13  15    0.40    0.70
  -1  15 -17    9.40    1.50
  -1 -15  17    8.90    1.70
  -1 -15  17    8.30    1.40
   1 -15  17    8.50    1.20
   1 -15  17    8.80    1.60
   1 -15  17    7.90    1.60
   1 -15  17    9.30    1.60
   1  15 -17    8.30    1.50
  -1  17 -19    9.60    1.70
  -1 -17  19    3.90    1.40
   1 -17  19    7.20    1.60
   1  17 -19    6.40    1.50
   1 -17  19    9.30    1.80
  -1  19 -21    0.70    1.30
  -1 -19  21    1.50    1.50
   1 -19  21    2.20    1.40
   1  19 -21    3.90    1.40
  -1  21 -23    1.80    1.50
  -1 -21  23    3.70    1.70
   1  21 -23   -0.90    1.30
   1 -21  23   -1.20    1.30
  -1  23 -25    0.00    1.50
  -1 -23  25   -1.90    1.60
   1 -23  25    1.30    1.70
   1  23 -25   -0.30    1.50
  -1 -25  27    1.10    1.80
  -1  25 -27    0.80    1.70
   1 -25  27    0.70    1.80
   1  25 -27   -1.70    1.60
  -2 -26  24    0.30    1.70
  -2  26 -24   -0.90    1.60
   2  26 -24   -1.00    1.60
   2 -26  24   -2.80    1.40
  -2  24 -22    2.20    1.60
  -2 -24  22    4.30    1.90
   2 -24  22    0.60    1.60
   2  24 -22    2.00    1.60
  -2  22 -20    8.70    1.90
  -2 -22  20    7.70    2.00
   2 -22  20    9.90    2.10
   2  22 -20    4.90    1.70
   2 -22  20    9.40    2.30
  -2 -20  18    3.30    1.50
  -2  20 -18    7.00    1.60
   2  20 -18    6.40    1.60
   2 -20  18    7.00    1.80
   2 -20  18    6.20    1.90
  -2 -18  16    9.40    1.70
  -2 -18  16    7.40    1.50
  -2  18 -16    6.00    1.50
   2 -18  16    6.30    1.60
   2 -18  16    5.30    1.50
   2 -18  16    4.50    1.40
   2  18 -16    7.40    1.50
  -2 -16  14   18.50    2.10
  -2 -16  14   20.10    2.00
  -2  16 -14   19.60    2.00
  -2 -16  14   19.20    2.30
   2 -16  14   23.80    2.50
   2 -16  14   20.20    2.10
   2 -16  14   21.30    2.20
   2  16 -14   23.60    2.30
  -2 -14  12   44.00    2.80
  -2 -14  12   42.60    2.50
  -2 -14  12   40.20    2.40
   2 -14  12   42.10    2.50
   2 -14  12   43.30    2.10
   2 -14  12   44.40    2.60
   2 -14  12   45.70    2.90
   2  14 -12   46.10    2.60
  -2  12 -10    4.90    1.00
  -2 -12  10    5.70    1.20
  -2 -12  10    5.20    1.00
  -2 -12  10    6.30    1.10
   2 -12  10    4.50    1.10
   2 -12  10    5.40    1.10
   2  12 -10    5.10    1.00
   2 -12  10    3.40    1.10
   2 -12  10    4.90    0.70
  -2 -10   8    1.80    0.80
  -2 -10   8    2.70    0.90
  -2 -10   8    0.50    0.80
  -2  10  -8    1.10    0.70
   2 -10   8    1.20    0.80
   2 -10   8    1.00    0.50
   2 -10   8    1.40    0.80
   2 -10   8   -0.10    0.70
   2  10  -8    1.20    0.70
  -2  -8   6   91.29    3.40
  -2   8  -6   90.99    3.40
  -2  -8   6   92.39    3.60
  -2  -8   6   92.79    3.40
   2  -8   6   88.09    3.00
   2  -8   6   91.79    3.40
   2   8  -6   87.09    3.40
   2  -8   6   90.69    3.60
   2  -8   6   91.79    3.40
  -2  -6   4   13.00    1.00
  -2  -6   4   10.80    0.90
  -2  -6   4   12.10    0.90
  -2   6  -4   13.10    0.90
   2  -6   4   11.40    0.90
   2   6  -4   12.10    0.90
   2  -6   4   12.10    1.00
   2  -6   4   12.30    0.90
  -2   4  -2   14.70    0.90
  -2  -4   2   15.10    0.90
  -2  -4   2   14.60    0.90
   2   4  -2   15.70    0.90
   2  -4   2   14.90    0.80
   2  -4   2   16.20    0.90
   2  -4   2   14.10    0.90
  -2  -2   0   54.09    1.90
   2  -2   0   53.99    1.80
   2  -2   0   53.29    1.80
   2   2   0   53.69    1.80
  -2   0   2  133.59    4.30
  -2   0  -2  135.09    4.20
   2   0   2  137.09    4.20
   2   0   2  138.89    4.30
   2   0   2  135.49    4.20
   2   0  -2  138.29    4.20
  -2  -2   4    2.90    0.50
   2  -2   4    3.40    0.50
   2  -2   4    3.10    0.40
   2   2  -4    4.30    0.40
   2  -2   4    4.60    0.50
  -2   4  -6    0.40    0.40
  -2  -4   6    1.10    0.50
  -2  -4   6    0.00    0.40
   2   4  -6    0.80    0.40
   2  -4   6    0.30    0.40
   2  -4   6    0.70    0.50
   2  -4   6    1.00    0.50
  -2  -6   8   27.90    1.50
  -2  -6   8   24.80    1.50
  -2   6  -8   27.10    1.50
   2  -6   8   24.90    1.50
   2  -6   8   25.90    1.50
   2   6  -8   26.50    1.40
   2  -6   8   25.60    1.50
  -2   8 -10   51.89    2.50
  -2  -8  10   55.69    2.50
  -2  -8  10   52.59    2.50
   2   8 -10   54.19    2.40
   2  -8  10   51.09    2.10
   2  -8  10   51.49    2.50
   2  -8  10   53.69    2.60
   2  -8  10   50.99    2.50
  -2 -10  12   21.30    1.90
  -2 -10  12   24.00    1.80
  -2  10 -12   22.50    1.70
   2 -10  12   20.90    1.70
   2 -10  12   21.40    1.40
   2  10 -12   25.30    1.70
   2 -10  12   19.10    1.80
   2 -10  12   20.10    1.70
  -2 -12  14    5.40    1.20
  -2 -12  14    3.40    0.90
  -2  12 -14    5.20    1.10
   2  12 -14    2.40    0.90
   2 -12  14    4.70    0.80
   2 -12  14    3.80    1.10
   2 -12  14    1.70    0.80
   2 -12  14    3.30    1.00
  -2 -14  16    1.00    0.90
  -2 -14  16    0.60    1.00
  -2  14 -16   -0.30    0.80
   2  14 -16   -1.40    0.70
   2 -14  16    1.10    0.90
   2 -14  16    1.10    1.00
   2 -14  16    1.10    1.00
   2 -14  16   -0.60    0.60
  -2  16 -18   51.99    3.20
  -2 -16  18   52.39    3.30
  -2 -16  18   49.70    3.10
   2  16 -18   55.69    3.20
   2 -16  18   54.49    3.30
   2 -16  18   51.09    3.50
   2 -16  18   49.00    3.20
  -2  18 -20    1.10    1.20
  -2 -18  20    2.50    1.40
   2 -18  20   -0.40    1.30
   2  18 -20    1.00    1.30
   2 -18  20    2.10    1.30
  -2 -20  22    8.00    2.00
  -2  20 -22    7.00    1.80
   2 -20  22    5.10    1.80
   2  20 -22    6.50    1.70
  -2 -22  24    3.30    1.80
  -2  22 -24    1.30    1.50
   2 -22  24    3.00    1.80
   2  22 -24    2.10    1.60
  -2  24 -26    2.00    1.90
  -2 -24  26    2.80    1.80
   2  24 -26    3.20    1.90
   2 -24  26    4.00    1.90
  -3  25 -23   -0.30    1.50
  -3 -25  23    0.20    1.70
   3  25 -23    0.30    1.60
   3 -25  23    0.60    1.60
  -3  23 -21    0.90    1.50
  -3 -23  21    3.40    1.80
   3  23 -21    5.10    1.80
   3 -23  21    1.00    1.50
   3 -23  21    4.10    1.90
  -3 -21  19    3.60    1.60
  -3  21 -19    2.50    1.40
   3  21 -19    1.80    1.50
   3 -21  19    2.90    1.80
   3 -21  19    4.80    1.70
  -3 -19  17    4.10    1.40
  -3 -19  17   -0.50    1.20
  -3  19 -17    3.80    1.40
   3 -19  17    1.70    1.40
   3 -19  17    4.90    1.60
   3  19 -17    3.70    1.30
   3 -19  17    3.20    1.40
  -3 -17  15    0.00    1.00
  -3 -17  15    0.90    1.00
  -3  17 -15    1.20    1.00
   3  17 -15   -1.40    0.90
   3 -17  15    1.30    1.10
   3 -17  15    0.30    0.90
   3 -17  15    0.30    1.10
  -3  15 -13   18.30    1.90
  -3 -15  13   23.70    2.00
  -3 -15  13   24.40    2.10
   3 -15  13   23.20    2.40
   3 -15  13   24.20    2.20
   3  15 -13   24.10    2.00
   3 -15  13   21.70    2.20
  -3  13 -11   29.60    2.00
  -3 -13  11   30.10    2.10
  -3 -13  11   24.90    2.00
   3 -13  11   29.10    2.00
   3 -13  11   27.80    1.40
   3  13 -11   30.10    2.00
   3 -13  11   28.70    2.20
   3 -13  11   27.70    2.00
  -3 -11   9    1.40    0.90
  -3 -11   9   -0.30    0.70
  -3  11  -9    1.50    0.80
  -3 -11   9    2.30    0.80
   3 -11   9    1.50    0.80
   3 -11   9    1.50    0.90
   3  11  -9    1.90    0.80
   3 -11   9    1.50    0.50
   3 -11   9    1.00    0.90
  -3  -9   7   35.70    1.90
  -3  -9   7   37.20    2.10
  -3   9  -7   36.00    1.90
  -3  -9   7   32.70    1.80
   3   9  -7   35.00    1.90
   3  -9   7   38.50    2.00
   3  -9   7   29.80    1.80
   3  -9   7   33.90    2.00
   3  -9   7   32.20    1.30
  -3  -7   5   13.10    1.10
  -3  -7   5   10.80    1.10
  -3   7  -5   13.90    1.10
   3  -7   5   13.80    1.10
   3   7  -5   11.80    1.00
   3  -7   5   15.10    1.00
   3  -7   5   14.00    1.10
  -3  -5   3   94.79    3.30
  -3   5  -3   92.49    3.30
   3  -5   3   95.59    3.30
   3  -5   3   91.99    3.30
   3   5  -3   87.89    3.20
   3  -5   3   92.79    3.20
  -3  -3   1   37.10    1.50
   3   3  -1   35.70    1.50
   3  -3   1   35.20    1.40
   3  -3   1   37.30    1.50
   3  -3   1   35.20    1.50
  -3  -1  -1  409.86   12.00
  -3   1   1  398.46   11.90
   3  -1  -1  390.16   11.90
   3  -1  -1  403.66   11.90
   3   1   1  398.46   12.00
   3  -1  -1  386.06   11.90
  -3   1  -3    9.60    0.60
  -3  -1   3    9.70    0.80
   3   1  -3    8.30    0.60
   3  -1   3    9.70    0.70
   3  -1   3    9.50    0.50
   3  -1   3    9.00    0.70
   3   1  -3    9.90    0.60
  -3  -3   5    0.80    0.50
  -3   3  -5    0.70    0.20
   3  -3   5    0.20    0.40
   3   3  -5    0.50    0.30
   3  -3   5    1.00    0.40
   3  -3   5    0.70    0.50
  -3  -5   7  162.18    5.50
  -3   5  -7  165.98    5.50
   3   5  -7  161.98    5.30
   3  -5   7  164.58    5.50
   3  -5   7  162.48    5.50
   3  -5   7  162.28    5.50
  -3  -7   9    0.60    0.60
  -3  -7   9    0.90    0.60
  -3   7  -9    0.70    0.50
   3   7  -9    0.90    0.50
   3  -7   9    1.70    0.70
   3  -7   9    1.10    0.60
   3  -7   9    1.00    0.60
  -3  -9  11    0.10    0.70
  -3  -9  11    2.70    0.90
  -3   9 -11    0.20    0.70
   3  -9  11    1.10    0.80
   3  -9  11    0.90    0.90
   3   9 -11    0.80    0.60
   3  -9  11    2.10    0.80
  -3 -11  13    1.00    0.80
  -3  11 -13    1.20    0.80
  -3 -11  13   -0.10    0.70
   3 -11  13    0.80    0.80
   3  11 -13    0.00    0.70
   3 -11  13    0.90    0.90
   3 -11  13    1.90    0.90
  -3  13 -15    5.80    1.20
  -3 -13  15    8.20    1.40
  -3 -13  15    7.20    1.30
   3 -13  15    7.30    1.40
   3 -13  15    6.60    1.40
   3 -13  15    6.10    1.20
   3  13 -15    8.40    1.30
  -3 -15  17    5.00    1.40
  -3 -15  17    3.80    1.20
  -3  15 -17    3.10    1.10
   3 -15  17    6.10    1.50
   3 -15  17    3.50    1.20
   3  15 -17    2.90    1.10
   3 -15  17    6.30    1.50
  -3  17 -19    3.40    1.30
  -3 -17  19    4.30    1.40
  -3 -17  19    0.70    1.20
   3 -17  19    2.10    1.30
   3 -17  19    3.20    1.40
   3 -17  19    1.20    1.20
   3  17 -19    3.70    1.30
  -3 -19  21    1.60    1.50
  -3  19 -21    0.50    1.30
   3 -19  21    0.40    1.20
   3  19 -21   -1.70    1.10
   3 -19  21    0.10    1.40
  -3 -21  23    1.80    1.50
  -3  21 -23    0.30    1.40
   3 -21  23   -0.30    1.50
   3 -21  23    1.90    1.30
   3  21 -23   -0.10    1.40
  -3  23 -25    0.10    1.50
  -3 -23  25    3.40    1.90
   3 -23  25    0.50    1.50
   3  23 -25   -2.60    1.40
  -3  25 -27   -0.80    1.70
  -3 -25  27   -2.90    1.60
   3  25 -27   -1.50    1.70
   3 -25  27   -0.30    1.70
  -4  26 -24    0.80    1.80
   4 -26  24    1.50    1.90
   4  26 -24    1.20    1.90
  -4  24 -22    3.60    1.70
   4 -24  22    4.10    1.90
   4  24 -22    1.00    1.70
  -4  22 -20    1.50    1.30
  -4 -22  20    2.30    1.70
   4 -22  20    4.80    1.60
   4  22 -20    1.60    1.50
   4 -22  20    0.60    1.50
   4 -22  20   -0.50    1.50
  -4  20 -18   -0.80    1.10
  -4 -20  18   -0.20    1.30
  -4 -20  18    2.60    1.40
   4  20 -18    0.70    1.20
   4 -20  18    2.50    1.50
   4 -20  18    0.00    1.10
   4 -20  18    0.20    1.30
  -4  18 -16    2.10    1.20
  -4 -18  16    1.20    1.20
  -4 -18  16    0.70    1.20
   4  18 -16    1.70    1.20
   4 -18  16    1.20    1.10
   4 -18  16    0.60    1.20
   4 -18  16    1.50    1.20
  -4 -16  14   -0.70    0.90
  -4 -16  14   -0.50    0.90
  -4  16 -14    1.60    1.00
   4 -16  14   -0.40    0.90
   4  16 -14    0.50    0.90
   4 -16  14   -0.10    0.90
   4 -16  14    0.30    1.00
  -4 -14  12   10.10    1.50
  -4  14 -12   10.70    1.50
  -4 -14  12   13.30    1.60
   4 -14  12   11.90    1.60
   4  14 -12    8.60    1.30
   4 -14  12   10.70    1.50
   4 -14  12   16.40    1.90
  -4 -12  10    4.50    1.10
  -4 -12  10    4.10    1.10
  -4  12 -10    5.30    1.10
   4 -12  10    4.70    1.10
   4 -12  10    3.70    1.10
   4 -12  10    7.50    1.30
   4  12 -10    4.50    0.90
  -4  10  -8    9.60    1.20
  -4 -10   8   13.70    1.50
   4 -10   8   13.90    1.40
   4 -10   8    9.20    1.20
   4  10  -8   10.00    1.20
   4 -10   8   11.90    1.40
  -4  -8   6    3.90    0.80
  -4   8  -6    2.90    0.70
   4  -8   6    5.50    0.90
   4   8  -6    4.60    0.80
   4  -8   6    4.00    0.80
   4  -8   6    4.40    0.80
  -4   6  -4  158.88    5.20
  -4  -6   4  153.08    5.30
   4   6  -4  151.58    5.10
   4  -6   4  153.98    5.20
   4  -6   4  157.08    5.20
   4  -6   4  151.88    5.20
  -4   4  -2  153.58    5.00
  -4  -4   2  153.38    5.10
   4  -4   2  150.98    5.00
   4   4  -2  155.68    5.00
   4  -4   2  157.78    5.00
   4  -4   2  154.48    5.10
  -4   2   0    0.00    0.30
  -4  -2   0   -0.40    0.40
   4   2   0    0.20    0.20
   4  -2   0    0.20    0.30
   4  -2   0    0.20    0.30
   4   2   0    0.40    0.40
  -4   0   2   -0.10    0.40
  -4   0  -2    0.60    0.30
   4   0  -2    0.20    0.30
   4   0  -2    0.10    0.30
   4   0   2   -0.10    0.30
   4   0   2    0.00    0.30
  -4  -2   4   41.30    1.90
  -4   2  -4   41.70    1.50
   4   2  -4   41.20    1.60
   4  -2   4   40.10    1.70
   4   2  -4   42.70    1.70
   4  -2   4   39.00    1.70
   4  -2   4   42.00    1.60
  -4  -4   6  152.98    5.20
  -4   4  -6  154.68    5.10
  -4   4  -6  146.79    4.60
   4  -4   6  155.68    5.00
   4  -4   6  148.69    5.10
   4   4  -6  152.88    5.00
   4  -4   6  150.38    5.10
  -4   6  -8   14.00    0.70
  -4  -6   8   14.40    1.30
  -4   6  -8   14.30    1.10
   4  -6   8   14.70    1.20
   4   6  -8   14.50    1.10
   4  -6   8   16.80    1.20
   4  -6   8   17.10    1.30
  -4   8 -10    5.70    1.00
  -4  -8  10    3.80    1.00
   4  -8  10    2.60    0.90
   4  -8  10    4.70    1.10
   4  -8  10    4.40    1.00
   4   8 -10    3.80    0.80
  -4 -10  12   19.30    1.90
  -4  10 -12   17.30    1.70
  -4 -10  12   20.90    1.90
   4 -10  12   15.80    1.70
   4 -10  12   17.20    1.70
   4 -10  12   16.80    1.70
   4  10 -12   16.30    1.50
  -4 -12  14   42.50    2.60
  -4 -12  14   41.70    2.50
  -4  12 -14   42.80    2.50
   4 -12  14   42.00    2.70
   4 -12  14   42.50    2.60
   4 -12  14   40.60    2.60
   4  12 -14   40.40    2.40
  -4 -14  16   -0.40    0.80
  -4 -14  16   -0.30    0.90
  -4  14 -16    0.10    0.90
   4 -14  16    1.60    1.10
   4 -14  16   -0.60    0.70
   4  14 -16   -0.10    0.80
   4 -14  16   -1.20    0.80
  -4 -16  18    7.60    1.60
  -4  16 -18    3.50    1.10
  -4 -16  18    5.40    1.50
   4 -16  18    3.90    1.30
   4 -16  18    4.40    1.50
   4  16 -18    5.10    1.30
   4 -16  18    4.40    1.40
  -4 -18  20    2.90    1.50
  -4 -18  20    2.80    1.50
  -4  18 -20    1.30    1.30
   4 -18  20    1.30    1.20
   4 -18  20    1.90    1.40
   4 -18  20    1.70    1.50
   4  18 -20    3.90    1.40
  -4 -20  22    4.50    1.80
  -4  20 -22    7.40    1.80
   4  20 -22    2.30    1.50
   4 -20  22    2.90    1.50
   4 -20  22    1.90    1.60
  -4 -22  24   -0.50    1.50
  -4  22 -24   -0.30    1.50
   4  22 -24    1.30    1.50
   4 -22  24   -0.20    1.60
   4 -22  24    2.90    1.60
  -4  24 -26    0.00    1.70
   4 -24  26    0.80    1.80
   4  24 -26   -0.50    1.70
  -5  25 -23   -1.00    1.60
   5 -25  23    0.50    1.70
   5  25 -23   -0.30    1.70
  -5  23 -21    3.60    1.70
   5 -23  21    6.00    1.90
   5  23 -21    5.80    2.00
   5 -23  21    3.90    1.90
   5 -23  21    4.30    1.80
  -5  21 -19   -0.10    1.10
  -5 -21  19    0.90    1.50
   5 -21  19   -0.40    1.40
   5  21 -19    0.80    1.50
   5 -21  19    2.00    1.50
   5 -21  19    0.10    1.10
  -5  19 -17    0.80    1.10
  -5 -19  17   -1.30    1.20
   5 -19  17    0.40    1.20
   5 -19  17   -0.40    1.20
   5 -19  17    2.20    1.40
   5  19 -17    1.10    1.30
  -5 -17  15    7.50    1.60
  -5  17 -15    6.90    1.50
   5  17 -15    5.20    1.30
   5 -17  15    3.90    1.40
   5 -17  15    8.10    1.80
   5 -17  15    4.80    1.30
  -5  15 -13    9.30    1.40
  -5 -15  13   12.10    1.70
   5 -15  13    8.70    1.40
   5 -15  13    9.80    1.70
   5  15 -13   10.00    1.50
   5 -15  13    8.60    1.60
  -5 -13  11   39.80    2.50
  -5  13 -11   37.40    2.40
   5  13 -11   34.30    2.20
   5 -13  11   38.80    2.40
   5 -13  11   36.20    2.50
   5 -13  11   35.30    2.30
  -5 -11   9   34.30    2.30
  -5  11  -9   36.80    2.20
   5  11  -9   34.30    2.10
   5 -11   9   38.10    2.20
   5 -11   9   39.70    2.30
   5 -11   9   36.20    2.30
  -5   9  -7   25.60    1.70
  -5  -9   7   26.70    1.90
   5  -9   7   22.60    1.70
   5  -9   7   27.20    1.90
   5  -9   7   25.00    1.80
   5   9  -7   25.00    1.70
  -5   7  -5   55.19    2.40
  -5  -7   5   53.69    2.50
   5  -7   5   53.19    2.40
   5  -7   5   54.99    2.40
   5  -7   5   54.29    2.40
   5   7  -5   53.49    2.30
  -5   5  -3   12.90    1.00
  -5   5  -3   14.80    0.70
  -5  -5   3   15.20    1.20
   5   5  -3   12.80    1.00
   5  -5   3   14.50    1.10
   5  -5   3   13.40    1.10
   5  -5   3   14.40    1.00
  -5   3  -1    4.80    0.50
  -5  -3   1    4.60    0.70
   5   3  -1    4.20    0.60
   5  -3   1    5.50    0.60
   5  -3   1    5.10    0.60
   5   3  -1    5.50    0.50
  -5   1   1    0.90    0.40
  -5  -1  -1    1.30    0.50
   5   1   1    0.60    0.20
   5  -1  -1    0.60    0.40
   5  -1  -1    0.60    0.30
   5  -1  -1    0.70    0.40
   5   1   1    0.80    0.40
  -5   1  -3    0.90    0.40
  -5  -1   3   -0.30    0.40
   5  -1   3    1.00    0.40
   5  -1   3    0.10    0.40
   5   1  -3    0.20    0.30
   5   1  -3    0.90    0.40
   5  -1   3    0.40    0.30
  -5   3  -5    6.20    0.50
  -5  -3   5    6.30    0.90
   5  -3   5    7.70    0.70
   5  -3   5    6.00    0.80
   5  -3   5    6.70    0.90
   5   3  -5    7.50    0.80
   5   3  -5    6.80    0.70
  -5  -5   7    2.70    0.80
  -5   5  -7    1.50    0.30
  -5   5  -7    1.40    0.60
   5  -5   7    1.50    0.60
   5  -5   7    1.60    0.60
   5  -5   7    1.50    0.50
   5   5  -7    1.60    0.50
  -5  -7   9   15.80    1.60
  -5   7  -9   14.90    1.40
   5  -7   9   16.20    1.50
   5  -7   9   17.00    1.60
   5  -7   9   15.20    1.40
   5   7  -9   14.10    1.20
  -5   9 -11    7.70    0.50
  -5  -9  11   11.20    1.40
  -5   9 -11   12.20    1.40
   5  -9  11    9.20    1.40
   5  -9  11    8.40    1.30
   5   9 -11    8.10    1.10
   5  -9  11    9.90    1.40
  -5 -11  13    4.60    1.10
  -5  11 -13    5.20    1.10
   5 -11  13    2.90    1.00
   5  11 -13    3.60    0.90
   5 -11  13    3.40    1.00
   5 -11  13    2.70    1.00
  -5 -13  15   17.90    2.00
  -5  13 -15   21.80    2.20
   5 -13  15   24.30    2.30
   5 -13  15   18.70    2.00
   5 -13  15   16.80    1.90
   5  13 -15   19.50    1.90
  -5  15 -17    0.40    0.90
  -5 -15  17    2.40    1.20
   5 -15  17    1.80    1.20
   5 -15  17    1.40    1.10
   5 -15  17   -0.10    1.10
   5  15 -17   -0.20    0.90
  -5 -17  19   17.60    2.20
  -5  17 -19   18.10    2.30
   5  17 -19   19.60    2.20
   5 -17  19   21.50    2.60
   5 -17  19   16.10    2.10
   5 -17  19   18.20    2.40
  -5  19 -21    1.70    1.30
  -5 -19  21    1.70    1.50
   5 -19  21    0.90    1.40
   5  19 -21    0.30    1.30
   5 -19  21   -1.10    1.10
   5 -19  21    0.30    1.50
  -5  21 -23    2.40    1.60
   5 -21  23    3.00    1.50
   5  21 -23    3.40    1.70
   5 -21  23    6.50    2.10
  -5  23 -25   -1.60    1.50
   5  23 -25   -1.40    1.50
   5 -23  25   -0.10    1.40
   5 -23  25    0.00    1.70
  -5  25 -27    0.50    1.90
   5 -25  27   -1.60    1.50
   5  25 -27    0.70    1.80
  -6  26 -24    2.80    1.90
   6 -26  24   -0.80    1.70
   6  26 -24    2.60    2.10
  -6  24 -22    8.70    2.10
   6  24 -22   11.90    2.40
   6 -24  22    8.60    2.30
   6 -24  22   14.30    2.80
   6 -24  22   11.80    2.30
  -6  22 -20   14.00    2.30
   6 -22  20   15.30    2.60
   6 -22  20    7.70    1.90
   6  22 -20   11.90    2.20
   6 -22  20   13.60    2.50
  -6 -20  18    0.40    1.40
  -6  20 -18   -0.80    1.00
   6 -20  18   -1.30    1.10
   6 -20  18    1.30    1.50
   6 -20  18    1.80    1.50
   6  20 -18   -1.90    1.20
  -6 -18  16    2.10    1.40
  -6  18 -16    1.90    1.10
   6 -18  16    0.30    1.00
   6  18 -16    1.70    1.10
   6 -18  16    0.90    1.30
   6 -18  16    1.40    1.40
  -6  16 -14   50.49    3.20
  -6 -16  14   62.79    3.50
   6  16 -14   56.49    3.20
   6 -16  14   54.29    3.20
   6 -16  14   53.19    3.50
   6 -16  14   48.10    3.20
  -6  14 -12  103.89    4.60
  -6 -14  12  112.29    4.90
   6  14 -12  107.49    4.50
   6 -14  12  106.79    4.80
   6 -14  12  103.59    4.60
   6 -14  12  105.29    4.70
  -6  12 -10   31.70    2.20
  -6 -12  10   37.40    2.50
   6 -12  10   33.50    2.30
   6 -12  10   33.60    2.20
   6  12 -10   37.20    2.20
   6 -12  10   33.80    2.30
  -6 -10   8   91.69    4.10
  -6  10  -8   96.89    4.00
   6 -10   8   91.29    3.90
   6 -10   8   93.49    4.00
   6 -10   8   97.19    4.10
   6  10  -8   92.69    3.80
  -6  -8   6    2.40    0.90
  -6   8  -6    2.40    0.80
   6   8  -6    4.60    0.90
   6  -8   6    3.90    0.90
   6  -8   6    4.10    0.90
   6  -8   6    5.50    1.10
  -6   6  -4    2.20    0.60
  -6   6  -4    2.90    0.30
  -6  -6   4    2.70    0.70
   6   6  -4    3.30    0.70
   6  -6   4    3.50    0.70
   6  -6   4    3.20    0.70
   6  -6   4    4.60    0.90
  -6   4  -2    1.20    0.40
  -6  -4   2    0.10    0.50
   6  -4   2    1.30    0.50
   6  -4   2    1.30    0.40
   6   4  -2    1.00    0.50
   6   4  -2    1.40    0.40
   6  -4   2    1.00    0.60
  -6  -2   0  269.17    8.50
  -6   2   0  269.97    8.30
   6  -2   0  260.87    8.30
   6   2   0  269.37    8.50
   6   2   0  266.17    8.10
   6  -2   0  264.07    8.20
  -6   0  -2    9.60    0.80
  -6   0   2    7.00    0.80
   6   0   2    8.60    0.90
   6   0   2    6.60    0.80
   6   0  -2    8.40    0.80
   6   0   2    7.20    0.50
   6   0  -2    7.60    0.60
  -6   2  -4    4.50    0.50
  -6  -2   4    4.00    0.70
   6   2  -4    5.20    0.60
   6  -2   4    4.80    0.80
   6  -2   4    4.70    0.50
   6  -2   4    3.40    0.60
   6   2  -4    4.30    0.60
  -6   4  -6    1.80    0.40
  -6  -4   6    2.30    0.70
   6   4  -6    2.10    0.50
   6  -4   6    1.60    0.60
   6   4  -6    1.70    0.50
   6  -4   6    1.40    0.60
   6  -4   6    1.70    0.50
  -6   6  -8   99.49    3.20
  -6   6  -8  101.19    4.00
  -6  -6   8  102.69    4.20
   6  -6   8  105.49    3.90
   6  -6   8  107.69    4.10
   6   6  -8  104.29    3.80
   6  -6   8  104.59    4.00
  -6  -8  10    2.60    0.90
  -6   8 -10    2.30    0.90
   6  -8  10    4.50    1.00
   6   8 -10    2.50    0.80
   6  -8  10    2.20    0.90
   6  -8  10    2.00    0.80
  -6 -10  12   32.00    2.30
  -6  10 -12   34.00    2.20
   6 -10  12   30.20    2.10
   6  10 -12   32.20    2.00
   6 -10  12   33.20    2.20
   6 -10  12   30.00    2.10
  -6 -12  14   36.60    2.60
  -6  12 -14   36.30    2.40
   6 -12  14   38.20    2.50
   6 -12  14   33.40    2.40
   6  12 -14   35.00    2.20
   6 -12  14   37.90    2.50
  -6 -14  16    9.60    1.70
  -6  14 -16   10.50    1.60
   6  14 -16   12.60    1.70
   6 -14  16   11.80    1.80
   6 -14  16   15.50    2.00
   6 -14  16   14.70    1.90
  -6  16 -18    2.70    1.20
  -6 -16  18    1.60    1.20
   6  16 -18   -0.80    1.00
   6 -16  18    1.20    1.30
   6 -16  18   -1.10    1.00
   6 -16  18    1.40    1.20
  -6  18 -20    1.50    1.20
  -6 -18  20    2.80    1.50
   6 -18  20    1.10    1.50
   6 -18  20    2.30    1.30
   6  18 -20    5.30    1.60
   6 -18  20    6.30    1.80
  -6  20 -22    4.00    1.50
  -6 -20  22    2.60    1.70
   6 -20  22    9.10    2.20
   6 -20  22    1.60    1.60
   6  20 -22    4.80    1.80
   6 -20  22    0.90    1.40
  -6  22 -24    3.00    1.70
   6 -22  24    2.30    2.00
   6 -22  24    1.50    1.40
   6  22 -24    1.60    1.80
  -6  24 -26    3.20    1.90
   6  24 -26   -0.30    1.70
   6 -24  26    0.10    1.40
   6 -24  26    0.20    1.80
  -7  25 -23    2.70    1.60
   7  25 -23    2.50    2.00
   7 -25  23    0.90    1.50
   7 -25  23    3.20    2.10
   7 -25  23    0.90    1.90
  -7  23 -21   12.90    2.40
   7 -23  21   13.50    2.40
   7  23 -21   16.40    2.50
   7 -23  21   12.30    2.60
   7 -23  21   14.50    2.70
  -7  21 -19    2.20    1.30
  -7 -21  19    2.40    1.70
   7  21 -19   -0.30    1.40
   7 -21  19    3.00    1.50
   7 -21  19    2.20    1.60
   7 -21  19    3.00    1.70
  -7 -19  17    0.30    1.40
  -7  19 -17   -0.80    0.90
   7 -19  17    0.00    1.10
   7 -19  17    0.40    1.30
   7 -19  17   -0.50    1.30
   7  19 -17    0.80    1.30
  -7  17 -15   -0.50    1.00
  -7 -17  15    0.40    1.20
   7 -17  15    1.50    1.30
   7  17 -15    1.10    1.10
   7 -17  15   -1.00    0.90
   7 -17  15   -1.10    1.00
  -7 -15  13   19.30    2.20
  -7  15 -13   23.60    2.30
   7  15 -13   20.10    2.10
   7 -15  13   18.30    2.10
   7 -15  13   18.90    2.20
   7 -15  13   21.10    2.30
  -7 -13  11   17.00    2.00
  -7  13 -11   20.30    2.00
   7  13 -11   18.90    1.80
   7 -13  11   20.10    2.10
   7 -13  11   17.40    1.90
   7 -13  11   20.20    2.10
  -7  11  -9    0.40    0.70
  -7 -11   9    0.20    0.80
   7 -11   9    1.80    0.90
   7 -11   9   -0.50    0.60
   7 -11   9    0.70    0.80
   7  11  -9   -0.10    0.70
  -7  -9   7    8.70    1.30
  -7   9  -7   10.60    1.30
   7  -9   7    8.90    1.20
   7   9  -7    9.60    1.20
   7  -9   7   10.30    1.40
   7  -9   7    9.30    1.20
  -7   7  -5   -0.20    0.60
  -7  -7   5   -0.70    0.70
   7  -7   5    0.30    0.70
   7   7  -5    0.00    0.60
   7  -7   5   -0.10    0.60
   7  -7   5   -0.50    0.60
  -7  -5   3   18.60    1.50
  -7   5  -3   19.50    1.00
   7  -5   3   18.00    1.30
   7   5  -3   18.30    1.30
   7   5  -3   19.00    1.10
   7  -5   3   19.10    1.30
   7  -5   3   20.70    1.40
  -7   3  -1   20.70    1.20
  -7  -3   1   24.30    1.50
   7  -3   1   21.70    1.20
   7   3  -1   19.60    1.30
   7   3  -1   22.20    1.00
   7  -3   1   23.00    1.30
  -7  -1  -1   49.80    2.10
  -7   1   1   47.60    2.10
   7  -1  -1   45.00    1.80
   7   1   1   47.80    2.10
   7  -1  -1   48.20    2.00
   7  -1  -1   48.80    2.00
   7   1   1   43.30    1.70
  -7   1  -3    0.80    0.40
  -7  -1   3    0.60    0.50
   7   1  -3    0.30    0.40
   7  -1   3    0.70    0.30
   7  -1   3    0.70    0.50
   7   1  -3    0.10    0.40
  -7  -3   5   16.70    1.40
  -7   3  -5   16.50    1.00
   7  -3   5   16.20    1.30
   7  -3   5   16.80    1.30
   7  -3   5   16.60    1.00
   7   3  -5   17.80    1.20
   7   3  -5   16.00    1.10
  -7   5  -7    3.70    0.50
  -7  -5   7    4.30    1.00
   7   5  -7    2.90    0.70
   7  -5   7    3.60    0.70
   7  -5   7    1.70    0.70
   7   5  -7    4.00    0.80
   7  -5   7    2.20    0.80
  -7   7  -9   -0.20    0.20
  -7  -7   9   -0.50    0.70
  -7   7  -9   -0.30    0.60
   7  -7   9   -1.30    0.60
   7  -7   9    0.60    0.60
   7   7  -9   -0.60    0.50
   7  -7   9    0.60    0.70
  -7  -9  11    0.00    0.80
  -7   9 -11    0.70    0.70
   7  -9  11    0.00    0.70
   7   9 -11    0.30    0.60
   7  -9  11    0.90    0.80
   7  -9  11    0.50    0.80
  -7  11 -13    0.40    0.90
  -7 -11  13    1.90    1.00
   7 -11  13    1.20    0.90
   7 -11  13    2.10    0.90
   7 -11  13    0.90    0.80
   7  11 -13    0.70    0.70
  -7  13 -15   17.90    2.00
  -7 -13  15   16.40    2.10
   7  13 -15   17.20    1.80
   7 -13  15   18.40    2.00
   7 -13  15   14.50    1.90
   7 -13  15   18.70    2.10
  -7 -15  17    2.30    1.40
  -7  15 -17    4.30    1.30
   7  15 -17    6.40    1.40
   7 -15  17    2.30    1.20
   7 -15  17    3.80    1.50
   7 -15  17    6.90    1.60
  -7  17 -19    1.20    1.20
  -7 -17  19    3.50    1.50
   7  17 -19    2.50    1.40
   7 -17  19    2.90    1.60
   7 -17  19    1.70    1.30
   7 -17  19    3.00    1.50
  -7  19 -21   -1.90    1.00
  -7 -19  21    2.20    1.60
   7  19 -21    2.00    1.50
   7 -19  21    0.40    1.30
   7 -19  21    2.20    1.60
   7 -19  21    0.50    1.50
  -7 -21  23   12.80    2.50
  -7  21 -23    9.80    2.20
   7 -21  23   18.10    2.80
   7 -21  23   16.50    2.80
   7 -21  23   13.40    2.40
   7  21 -23   13.90    2.40
  -7  23 -25    4.90    1.90
   7 -23  25    5.80    1.90
   7 -23  25    6.00    2.30
   7  23 -25    4.20    2.00
  -8  24 -22    2.00    1.70
   8 -24  22    0.30    1.50
   8 -24  22    3.70    1.90
   8 -24  22   -2.40    1.20
   8  24 -22   -0.40    1.60
  -8  22 -20   -0.70    1.20
  -8 -22  20    3.30    1.90
   8  22 -20    3.70    1.80
   8 -22  20    1.80    1.80
   8 -22  20    0.60    1.40
   8 -22  20    0.70    1.50
  -8  20 -18    0.20    1.20
  -8 -20  18    1.70    1.60
   8 -20  18   -0.10    1.20
   8  20 -18    1.40    1.40
   8 -20  18   -1.10    1.30
   8 -20  18   -0.50    1.30
  -8 -18  16    1.40    1.60
  -8  18 -16    2.80    1.20
   8  18 -16    1.50    1.30
   8 -18  16    1.30    1.40
   8 -18  16   -0.10    1.20
   8 -18  16    1.70    1.30
  -8  16 -14    1.70    1.10
  -8 -16  14    0.50    1.10
   8  16 -14    0.50    1.00
   8 -16  14    2.20    1.10
   8 -16  14   -0.20    1.10
   8 -16  14    0.80    1.20
  -8 -14  12   23.90    2.40
  -8  14 -12   22.90    2.30
   8 -14  12   22.50    2.30
   8 -14  12   21.40    2.30
   8  14 -12   17.30    1.90
   8 -14  12   20.10    2.30
  -8  12 -10    0.70    0.80
  -8 -12  10   -1.00    0.80
   8 -12  10   -0.60    0.80
   8 -12  10    0.80    0.80
   8 -12  10    2.00    0.90
   8  12 -10   -0.90    0.60
  -8  10  -8   -0.20    0.60
  -8 -10   8   -0.90    0.80
   8 -10   8    2.00    0.90
   8 -10   8    0.40    0.70
   8 -10   8   -0.40    0.70
   8  10  -8    0.40    0.70
  -8  -8   6   13.40    1.60
  -8   8  -6   16.30    1.60
   8  -8   6   18.00    1.70
   8  -8   6   14.50    1.50
   8   8  -6   15.00    1.40
   8  -8   6   14.70    1.50
  -8  -6   4   19.20    1.70
  -8   6  -4   19.20    1.10
   8  -6   4   20.00    1.40
   8   6  -4   15.70    1.20
   8  -6   4   19.70    1.50
   8   6  -4   17.40    1.40
   8  -6   4   20.10    1.60
  -8  -4   2    1.80    0.70
  -8   4  -2    1.80    0.50
   8  -4   2    1.70    0.80
   8  -4   2    1.10    0.60
   8   4  -2    1.50    0.50
   8  -4   2    0.70    0.50
   8   4  -2    0.20    0.60
  -8  -2   0    0.80    0.60
  -8   2   0    0.60    0.50
   8   2   0    0.40    0.30
   8  -2   0   -0.20    0.50
   8  -2   0    1.00    0.40
   8   2   0    0.30    0.60
  -8   0   2    2.30    0.70
  -8   0  -2    3.40    0.70
   8   0   2    1.70    0.40
   8   0  -2    1.90    0.60
   8   0   2    4.30    0.80
   8   0   2    1.50    0.60
   8   0  -2    1.10    0.40
  -8  -2   4    0.60    0.70
  -8   2  -4    0.60    0.50
   8   2  -4    1.00    0.50
   8   2  -4    0.70    0.60
   8  -2   4    0.20    0.40
   8  -2   4    0.40    0.50
   8  -2   4    0.80    0.60
  -8  -4   6    4.10    1.00
  -8   4  -6    2.70    0.50
   8  -4   6    3.60    0.90
   8  -4   6    4.80    0.80
   8   4  -6    3.30    0.80
   8   4  -6    3.90    0.70
   8  -4   6    3.90    0.90
  -8  -6   8    7.40    1.20
  -8   6  -8    7.80    0.70
   8  -6   8    7.20    1.20
   8   6  -8    7.80    1.00
   8   6  -8    7.80    1.00
   8  -6   8    7.10    1.20
   8  -6   8    6.70    1.00
  -8  -8  10    2.70    1.00
  -8   8 -10    4.30    1.00
   8  -8  10    2.10    0.90
   8  -8  10    4.70    1.10
   8   8 -10    2.40    0.80
   8  -8  10    2.30    0.80
  -8 -10  12    0.00    0.80
  -8  10 -12    0.20    0.70
   8 -10  12   -0.10    0.80
   8  10 -12   -0.80    0.50
   8 -10  12    1.20    0.90
   8 -10  12   -0.10    0.70
  -8  12 -14   13.50    1.80
  -8 -12  14    9.20    1.60
   8 -12  14    8.90    1.50
   8 -12  14   12.60    1.80
   8  12 -14    8.40    1.30
   8 -12  14   11.90    1.70
  -8 -14  16   -0.90    1.00
  -8  14 -16    1.40    1.10
   8 -14  16   -0.20    1.10
   8 -14  16    0.40    1.10
   8 -14  16    1.90    1.00
   8  14 -16   -0.90    0.90
  -8  16 -18    2.50    1.30
  -8 -16  18    2.00    1.50
   8  16 -18    2.90    1.30
   8 -16  18    2.30    1.30
   8 -16  18    0.20    1.20
   8 -16  18    0.50    1.30
  -8 -18  20    1.10    1.50
  -8  18 -20    1.30    1.20
   8 -18  20    0.90    1.30
   8  18 -20    3.50    1.50
   8 -18  20    3.10    1.70
   8 -18  20    1.70    1.40
  -8  20 -22    4.40    1.60
  -8 -20  22    1.20    1.70
   8 -20  22    2.80    1.80
   8 -20  22    4.70    1.70
   8  20 -22    2.30    1.70
   8 -20  22    0.00    1.20
  -8 -22  24    2.50    2.10
  -8  22 -24    0.50    1.40
   8 -22  24    0.80    1.50
   8 -22  24   -3.10    1.50
   8  22 -24    2.90    1.70
  -8  24 -26    2.20    1.80
   8 -24  26    0.90    1.50
   8  24 -26   -1.30    1.60
   8 -24  26   -3.10    1.80
  -9  25 -23    0.40    1.60
   9 -25  23    3.00    2.00
   9  25 -23    4.30    2.00
   9 -25  23    1.50    1.60
   9 -25  23    3.60    1.90
  -9  23 -21    3.20    1.60
  -9 -23  21    7.40    2.10
   9 -23  21   10.00    2.30
   9 -23  21    5.60    1.80
   9 -23  21    7.40    2.30
   9  23 -21    9.10    2.10
  -9  21 -19    0.70    1.40
  -9 -21  19    2.60    1.80
   9 -21  19    0.30    1.20
   9 -21  19    1.70    1.70
   9 -21  19    0.40    1.50
   9  21 -19    0.70    1.40
  -9 -19  17   -2.50    1.20
  -9  19 -17   -0.90    1.10
   9 -19  17    0.40    1.40
   9 -19  17   -1.50    1.30
   9 -19  17   -1.80    0.90
   9  19 -17   -0.80    1.20
  -9  17 -15    0.60    1.00
  -9 -17  15   -0.20    1.20
   9  17 -15   -0.90    1.00
   9 -17  15    0.00    1.10
   9 -17  15    0.50    1.30
   9 -17  15    1.40    1.20
  -9 -15  13   35.60    2.90
  -9  15 -13   41.50    2.90
   9 -15  13   42.30    3.00
   9 -15  13   31.30    2.60
   9  15 -13   39.20    2.70
   9 -15  13   36.90    2.80
  -9 -13  11   15.20    2.00
  -9  13 -11   13.00    1.70
   9  13 -11   13.60    1.70
   9 -13  11   13.10    1.80
   9 -13  11   13.20    1.80
   9 -13  11   13.30    1.80
  -9 -11   9    1.30    1.00
  -9  11  -9    0.50    0.80
   9 -11   9    0.20    0.80
   9 -11   9    1.90    0.90
   9  11  -9    2.20    0.90
   9 -11   9    2.10    0.90
  -9   9  -7   79.59    3.60
  -9  -9   7   72.19    3.70
   9  -9   7   82.49    3.60
   9  -9   7   78.09    3.60
   9   9  -7   83.19    3.50
   9  -9   7   79.69    3.50
  -9   7  -5    1.20    0.40
  -9  -7   5    2.40    0.90
   9  -7   5    1.00    0.80
   9   7  -5    3.20    0.80
   9  -7   5    3.30    0.90
   9  -7   5    2.90    0.80
   9   7  -5    2.20    0.60
  -9   5  -3   10.70    1.00
  -9  -5   3    9.70    1.30
   9  -5   3   11.70    1.40
   9  -5   3   10.90    1.10
   9  -5   3    8.60    1.10
   9   5  -3   11.10    1.00
   9   5  -3   10.90    1.20
  -9  -3   1   13.10    1.40
  -9   3  -1   10.80    1.10
   9   3  -1   10.80    1.30
   9  -3   1   13.20    1.30
   9   3  -1   11.30    0.90
   9  -3   1   12.50    1.10
  -9   1   1  222.78    7.60
  -9  -1  -1  222.38    7.60
   9   1   1  228.98    7.10
   9   1   1  232.98    7.70
   9  -1  -1  228.58    7.60
   9  -1  -1  224.18    7.50
   9  -1  -1  225.98    7.20
   9   1   1  230.18    7.60
  -9   1  -3   41.30    2.00
  -9  -1   3   41.40    2.30
   9   1  -3   40.40    2.00
   9  -1   3   41.00    1.70
   9  -1   3   38.50    2.10
   9  -1   3   40.90    2.20
   9   1  -3   42.50    1.80
  -9   3  -5   46.20    2.00
  -9  -3   5   46.80    2.60
   9   3  -5   48.20    2.10
   9  -3   5   47.50    2.40
   9  -3   5   45.20    2.40
   9  -3   5   44.40    2.00
   9   3  -5   46.40    2.30
  -9  -5   7   42.30    2.60
  -9   5  -7   45.30    1.90
   9   5  -7   47.70    2.20
   9   5  -7   47.80    2.30
   9  -5   7   44.30    2.40
   9  -5   7   47.70    2.50
   9  -5   7   44.90    2.20
  -9  -7   9   35.20    2.40
  -9   7  -9   35.80    2.20
  -9   7  -9   32.80    1.40
   9   7  -9   34.70    2.00
   9   7  -9   36.00    2.00
   9  -7   9   34.30    2.00
   9  -7   9   33.70    2.20
   9  -7   9   35.10    2.20
  -9  -9  11    2.20    1.00
  -9   9 -11    2.60    0.90
   9  -9  11    2.60    0.90
   9  -9  11    1.60    0.80
   9  -9  11    3.30    1.00
   9   9 -11    3.00    0.90
  -9  11 -13    5.30    1.20
  -9 -11  13    1.30    1.00
   9 -11  13    1.80    1.00
   9  11 -13    1.20    0.80
   9 -11  13    2.50    1.10
   9 -11  13    2.90    1.00
  -9  13 -15    0.60    1.00
  -9 -13  15    4.30    1.40
   9 -13  15    3.30    1.30
   9 -13  15    3.50    1.20
   9  13 -15    4.80    1.30
   9 -13  15    1.30    1.10
  -9 -15  17   10.80    2.00
  -9  15 -17   10.80    1.90
   9  15 -17    8.00    1.60
   9 -15  17   12.20    2.10
   9 -15  17    6.90    1.70
   9 -15  17    7.70    1.70
  -9  17 -19    3.20    1.30
  -9 -17  19    5.00    1.80
   9 -17  19    4.60    1.50
   9 -17  19    2.40    1.50
   9  17 -19    4.70    1.50
   9 -17  19    3.40    1.60
  -9  19 -21    3.70    1.60
  -9 -19  21    1.30    1.60
   9 -19  21    2.20    1.60
   9 -19  21    3.60    1.70
   9  19 -21    3.50    1.70
   9 -19  21    0.40    1.20
  -9 -21  23   -1.90    1.50
  -9  21 -23   -0.50    1.30
   9  21 -23    1.50    1.60
   9 -21  23    0.60    1.50
   9 -21  23   -0.20    1.70
   9 -21  23    0.50    1.30
  -9  23 -25    8.50    2.10
   9  23 -25    4.90    2.00
   9 -23  25    9.20    2.60
   9 -23  25    6.00    1.90
 -10  24 -22    5.30    1.90
 -10 -24  22    8.50    2.50
  10 -24  22    2.40    1.70
  10  24 -22    6.90    2.10
  10 -24  22    6.50    2.30
  10 -24  22    7.40    2.40
 -10  22 -20   14.80    2.40
 -10 -22  20   11.40    2.60
  10  22 -20   16.10    2.60
  10 -22  20   21.30    3.10
  10 -22  20   22.90    3.10
  10 -22  20   16.80    2.60
 -10  20 -18    0.20    1.30
 -10 -20  18   -1.60    1.50
  10 -20  18   -0.60    1.40
  10 -20  18   -0.80    1.50
  10 -20  18    0.60    1.30
  10  20 -18   -0.60    1.30
 -10 -18  16    2.70    1.60
 -10  18 -16    1.90    1.30
  10  18 -16    1.70    1.40
  10 -18  16    1.80    1.30
  10 -18  16    2.20    1.50
  10 -18  16    2.70    1.60
 -10 -16  14    4.30    1.50
 -10  16 -14    5.50    1.40
  10  16 -14    4.70    1.40
  10 -16  14    3.30    1.40
  10 -16  14    4.10    1.50
  10 -16  14    4.60    1.50
 -10 -14  12   62.89    3.80
 -10  14 -12   62.79    3.60
  10 -14  12   58.89    3.50
  10 -14  12   60.29    3.60
  10 -14  12   59.79    3.50
  10  14 -12   62.39    3.40
 -10  12 -10   20.40    2.10
 -10 -12  10   17.90    2.20
  10 -12  10   16.10    1.90
  10 -12  10   21.30    2.20
  10 -12  10   20.30    2.10
  10  12 -10   20.20    2.00
 -10 -10   8   66.39    3.60
 -10  10  -8   71.79    3.50
  10 -10   8   73.09    3.40
  10  10  -8   72.59    3.40
  10 -10   8   69.89    3.40
  10 -10   8   72.39    3.50
 -10   8  -6   58.09    2.80
 -10   8  -6   65.19    3.10
 -10  -8   6   65.79    3.40
  10  -8   6   68.29    3.00
  10   8  -6   63.59    3.00
  10  -8   6   65.09    3.10
  10   8  -6   62.39    2.80
  10  -8   6   64.49    3.20
 -10  -6   4   25.10    1.90
 -10   6  -4   24.30    1.40
  10  -6   4   26.10    1.60
  10   6  -4   24.30    1.40
  10  -6   4   21.40    1.70
  10   6  -4   23.70    1.70
  10  -6   4   23.40    1.80
 -10  -4   2    0.50    0.70
 -10   4  -2    0.10    0.50
  10  -4   2    1.50    0.70
  10   4  -2    0.20    0.40
  10   4  -2    1.00    0.70
  10  -4   2    1.20    0.60
 -10  -2   0  130.89    4.90
 -10   2   0  122.89    4.70
  10  -2   0  129.99    4.70
  10   2   0  125.19    4.80
  10  -2   0  127.99    4.40
  10   2   0  130.19    4.20
 -10   0   2   20.60    1.70
 -10   0  -2   22.10    1.60
  10   0   2   23.10    1.60
  10   0   2   20.60    1.10
  10   0  -2   21.50    1.60
  10   0   2   20.90    1.70
  10   0  -2   22.50    1.30
 -10  -2   4   30.70    2.00
 -10   2  -4   25.60    1.60
  10  -2   4   29.30    1.90
  10  -2   4   26.50    1.80
  10   2  -4   30.20    1.80
  10  -2   4   28.60    1.40
  10   2  -4   27.20    1.50
 -10  -4   6    5.60    1.10
 -10   4  -6    6.40    0.80
  10  -4   6    7.20    0.90
  10  -4   6    4.90    1.00
  10   4  -6    6.80    0.90
  10  -4   6    5.20    1.20
  10   4  -6    7.70    1.10
 -10   6  -8  185.58    6.10
 -10  -6   8  187.18    7.10
  10  -6   8  193.78    6.90
  10   6  -8  191.38    6.60
  10  -6   8  193.78    6.90
  10   6  -8  180.58    6.50
  10  -6   8  187.88    6.50
 -10  -8  10    6.70    1.30
 -10   8 -10    5.00    1.10
  10   8 -10    5.40    1.00
  10  -8  10    4.80    1.20
  10  -8  10    6.00    1.20
  10   8 -10    6.40    1.10
  10  -8  10    4.00    1.00
 -10  10 -12   11.20    1.60
 -10 -10  12   13.20    1.90
  10 -10  12   15.30    1.80
  10 -10  12   14.80    1.80
  10 -10  12   12.00    1.80
  10  10 -12   18.00    1.70
  10  10 -12   14.80    1.60
 -10 -12  14    0.10    1.10
 -10  12 -14    0.40    1.00
  10 -12  14   -0.30    0.80
  10  12 -14    0.20    0.90
  10 -12  14    0.40    1.00
  10 -12  14    2.40    1.10
 -10 -14  16    6.60    1.70
 -10  14 -16    4.20    1.40
  10 -14  16    6.00    1.50
  10 -14  16    3.80    1.30
  10 -14  16    5.70    1.50
  10  14 -16    6.10    1.50
 -10  16 -18    9.30    1.80
 -10 -16  18    8.60    2.00
  10  16 -18    7.20    1.60
  10 -16  18    5.20    1.60
  10 -16  18    7.70    1.90
  10 -16  18    8.20    1.90
 -10  18 -20    1.40    1.30
 -10 -18  20    8.00    2.10
  10  18 -20    7.70    1.80
  10 -18  20    4.20    1.80
  10 -18  20    5.60    1.60
  10 -18  20   11.30    2.20
 -10  20 -22   -2.30    1.10
 -10 -20  22   -1.40    1.40
  10  20 -22    0.60    1.50
  10 -20  22    4.40    1.80
  10 -20  22    0.20    1.60
  10 -20  22   -1.40    1.20
 -10 -22  24    2.90    2.10
 -10  22 -24   -0.80    1.20
  10  22 -24   -1.70    1.60
  10 -22  24    0.10    1.40
  10 -22  24    0.30    1.80
  10 -22  24    1.30    1.70
 -11 -23  21    3.50    2.10
 -11  23 -21    1.50    1.40
  11 -23  21    2.40    1.90
  11  23 -21   -1.30    1.50
  11 -23  21    1.70    1.60
  11 -23  21    1.40    1.80
 -11 -21  19   -0.60    1.70
 -11  21 -19    1.40    1.50
  11  21 -19    0.50    1.40
  11 -21  19    0.50    1.50
  11 -21  19    2.00    1.70
  11 -21  19    0.10    1.30
 -11  19 -17   -0.20    1.20
 -11 -19  17    0.80    1.60
  11 -19  17    1.70    1.50
  11 -19  17    1.70    1.60
  11 -19  17   -0.80    1.10
  11  19 -17    2.40    1.50
 -11  17 -15   -0.30    1.00
 -11 -17  15    1.10    1.50
  11 -17  15    1.10    1.30
  11  17 -15    2.70    1.40
  11 -17  15    0.50    1.20
  11 -17  15   -0.70    1.20
 -11 -15  13   -1.00    1.20
 -11  15 -13   -1.00    1.00
  11 -15  13   -0.70    1.10
  11  15 -13    0.70    1.20
  11 -15  13   -0.20    1.10
  11 -15  13   -0.10    1.10
 -11 -13  11   26.60    2.70
 -11  13 -11   24.60    2.40
  11  13 -11   24.30    2.30
  11 -13  11   21.90    2.40
  11 -13  11   25.90    2.50
  11 -13  11   23.30    2.40
 -11 -11   9   32.10    2.60
 -11  11  -9   31.70    2.40
  11  11  -9   30.40    2.30
  11  11  -9   32.80    2.10
  11 -11   9   35.40    2.40
  11 -11   9   34.60    2.50
  11 -11   9   33.30    2.40
 -11   9  -7    7.80    1.30
 -11  -9   7    6.00    1.30
  11  -9   7    6.10    1.20
  11   9  -7    6.30    1.00
  11   9  -7    5.10    1.10
  11  -9   7    8.50    1.40
  11  -9   7    6.30    1.10
 -11  -7   5   22.60    1.90
 -11   7  -5   21.30    1.30
  11   7  -5   23.00    1.70
  11  -7   5   23.50    1.80
  11  -7   5   22.40    1.90
  11   7  -5   18.80    1.40
  11  -7   5   21.20    1.60
 -11  -5   3    2.40    0.90
 -11   5  -3    2.40    0.60
  11   5  -3    2.30    0.80
  11  -5   3    1.50    0.90
  11  -5   3    1.00    0.70
  11   5  -3    2.10    0.60
  11  -5   3    1.70    0.60
 -11   3  -1    0.20    0.50
 -11  -3   1    0.30    0.70
  11  -3   1    0.00    0.60
  11   3  -1    0.10    0.40
  11  -3   1    0.20    0.40
  11   3  -1   -0.60    0.60
 -11  -1  -1   61.09    2.90
 -11   1   1   64.59    2.90
  11  -1  -1   63.89    2.90
  11   1   1   66.79    3.00
  11   1   1   57.79    2.30
  11  -1  -1   64.59    2.90
  11   1   1   60.29    2.90
  11  -1  -1   57.29    2.40
 -11   1  -3    6.70    1.00
 -11  -1   3    6.20    1.10
  11  -1   3    5.90    1.00
  11   1  -3    8.30    1.20
  11   1  -3    6.80    0.80
  11  -1   3    7.80    0.80
 -11   3  -5    8.00    1.00
 -11  -3   5    5.70    1.20
  11  -3   5    7.20    1.10
  11  -3   5    9.50    1.40
  11   3  -5    8.10    1.20
  11  -3   5    7.60    0.90
  11   3  -5    6.30    0.90
 -11  -5   7   10.50    1.50
 -11   5  -7   11.80    1.00
  11   5  -7   10.70    1.20
  11   5  -7   12.70    1.40
  11  -5   7   15.30    1.70
  11  -5   7   12.90    1.50
  11  -5   7   12.60    1.20
 -11  -7   9   34.10    2.40
  11   7  -9   29.70    2.00
  11  -7   9   29.80    1.90
  11   7  -9   27.90    1.80
  11  -7   9   29.10    2.10
  11  -7   9   28.80    2.10
 -11   9 -11   39.90    2.60
 -11  -9  11   37.50    2.70
  11   9 -11   39.60    2.40
  11  -9  11   37.90    2.30
  11  -9  11   40.50    2.60
  11   9 -11   34.40    2.20
  11  -9  11   38.90    2.60
 -11  11 -13   12.60    1.80
 -11 -11  13   13.00    1.90
  11 -11  13    9.30    1.70
  11 -11  13   13.70    1.80
  11  11 -13   10.70    1.50
  11 -11  13   12.30    1.90
  11  11 -13   11.80    1.60
 -11  13 -15    1.00    1.10
 -11 -13  15    2.90    1.50
  11 -13  15    5.10    1.40
  11 -13  15    2.90    1.30
  11 -13  15    2.50    1.30
  11  13 -15    2.40    1.00
  11  13 -15    3.30    1.30
 -11 -15  17    4.70    1.70
 -11  15 -17    3.60    1.30
  11 -15  17    5.10    1.60
  11 -15  17    5.40    1.70
  11  15 -17    3.70    1.40
  11 -15  17    5.50    1.60
 -11  17 -19   17.10    2.40
 -11 -17  19   19.80    2.90
  11 -17  19   18.10    2.50
  11  17 -19   21.90    2.50
  11 -17  19   19.00    2.60
  11 -17  19   17.90    2.50
 -11  19 -21    1.30    1.30
 -11 -19  21    3.80    2.00
  11 -19  21   -0.10    1.30
  11 -19  21   -0.40    1.50
  11  19 -21    0.50    1.50
  11 -19  21    0.40    1.30
 -11  21 -23    0.40    1.40
 -11 -21  23   -1.80    1.60
  11 -21  23   -1.20    1.30
  11 -21  23    0.80    1.60
  11 -21  23    3.70    2.00
  11  21 -23    0.70    1.60
 -11 -23  25    3.70    2.40
 -11  23 -25    0.40    1.50
  11  23 -25   -0.40    1.70
  11 -23  25    0.70    1.50
 -12 -22  20    1.50    2.00
 -12  22 -20    4.10    1.70
  12  22 -20   -2.20    1.50
  12 -22  20    0.10    1.50
  12 -22  20   -0.10    1.60
  12 -22  20    0.60    1.70
 -12  20 -18    4.90    1.70
 -12 -20  18    7.50    2.30
  12 -20  18    8.50    2.20
  12  20 -18    5.80    2.00
  12 -20  18    9.00    2.20
  12 -20  18    5.70    1.80
 -12  18 -16    0.50    1.20
 -12 -18  16   -2.40    1.50
  12 -18  16    3.90    1.60
  12 -18  16   -0.30    1.20
  12 -18  16    3.50    1.70
  12  18 -16    3.20    1.60
 -12  16 -14   -0.30    1.00
 -12 -16  14    3.50    1.70
  12 -16  14    2.80    1.50
  12 -16  14    4.20    1.50
  12  16 -14    2.70    1.40
  12 -16  14    3.50    1.50
 -12  14 -12    6.30    1.50
 -12 -14  12    6.60    1.70
  12 -14  12   10.10    1.80
  12 -14  12    4.20    1.40
  12 -14  12    7.50    1.80
  12  14 -12    5.20    1.60
 -12 -12  10    0.20    1.00
 -12  12 -10    0.80    1.00
  12 -12  10   -0.50    0.80
  12 -12  10    0.20    0.90
  12  12 -10    0.30    0.80
  12 -12  10   -1.20    0.90
  12  12 -10    0.30    1.00
 -12  10  -8    3.50    1.10
 -12 -10   8    3.20    1.20
  12 -10   8    1.70    1.00
  12  10  -8    3.50    0.90
  12 -10   8    2.20    0.90
  12 -10   8    3.10    1.10
  12  10  -8    2.00    1.00
 -12  -8   6   15.80    1.90
  12   8  -6    8.80    1.10
  12   8  -6   10.90    1.50
  12  -8   6   12.30    1.50
  12  -8   6   12.10    1.40
  12  -8   6   11.00    1.60
 -12   6  -4   36.40    1.90
 -12  -6   4   33.20    2.40
  12   6  -4   33.50    1.80
  12  -6   4   34.30    2.30
  12  -6   4   37.20    2.20
  12   6  -4   34.20    2.20
  12  -6   4   35.00    2.00
 -12  -4   2    0.60    0.80
 -12   4  -2   -0.50    0.50
  12  -4   2    1.50    0.80
  12  -4   2    1.50    0.60
  12   4  -2    0.50    0.70
  12   4  -2    1.40    0.50
 -12  -2   0    1.10    0.70
 -12   2   0    1.40    0.70
  12  -2   0    1.20    0.50
  12   2   0    0.80    0.70
  12   2   0    0.60    0.40
  12  -2   0    1.60    0.70
  12   2   0    2.20    0.90
 -12   0   2    2.50    0.80
 -12   0  -2    1.60    0.70
  12   0  -2    0.30    0.60
  12   0   2   -0.40    0.60
  12   0  -2    0.80    0.50
  12   0   2    1.20    0.40
  12   0  -2    1.60    0.80
  12   0   2    2.30    0.90
 -12   2  -4   93.79    3.70
 -12  -2   4   94.49    4.10
  12  -2   4   92.99    3.40
  12   2  -4   90.69    3.80
  12   2  -4   86.69    3.40
  12  -2   4   91.89    4.00
 -12  -4   6    0.90    0.90
 -12   4  -6    1.80    0.60
  12  -4   6    2.30    1.00
  12   4  -6    2.00    0.90
  12  -4   6    1.50    0.60
  12  -4   6    2.40    0.90
  12   4  -6    1.80    0.60
 -12  -6   8    3.30    1.10
  12   6  -8    5.10    0.90
  12  -6   8    2.80    1.00
  12  -6   8    1.60    0.90
  12   6  -8    2.50    0.90
  12  -6   8    4.30    0.80
 -12  -8  10    1.30    1.00
 -12   8 -10    1.00    0.90
  12   8 -10    1.10    0.70
  12  -8  10    1.20    0.80
  12  -8  10    1.30    0.90
  12  -8  10    2.40    1.00
  12   8 -10    1.70    0.90
 -12  10 -12    6.20    1.40
 -12 -10  12    6.60    1.60
  12 -10  12    7.90    1.60
  12 -10  12    6.80    1.50
  12 -10  12    9.90    1.50
  12  10 -12    7.50    1.30
  12  10 -12    7.80    1.40
 -12  12 -14    3.60    1.20
 -12 -12  14   -0.60    1.20
  12 -12  14    1.20    1.20
  12 -12  14    2.60    1.30
  12  12 -14    1.30    0.90
  12  12 -14    0.40    1.10
  12 -12  14    2.30    1.10
 -12 -14  16   -1.80    1.30
 -12  14 -16   -0.50    1.10
  12 -14  16   -1.10    1.00
  12 -14  16   -0.30    1.20
  12  14 -16   -0.80    1.10
  12  14 -16    0.30    1.00
  12 -14  16    1.20    1.30
 -12  16 -18    1.10    1.30
 -12 -16  18   -0.40    1.60
  12 -16  18    1.40    1.40
  12 -16  18   -0.40    1.30
  12  16 -18    1.10    1.10
  12  16 -18   -2.10    1.20
  12 -16  18    3.70    1.50
 -12  18 -20   -0.50    1.10
 -12 -18  20    2.50    1.90
  12  18 -20    0.40    1.40
  12 -18  20   -0.40    1.30
  12 -18  20    1.90    1.70
  12 -18  20   -1.30    1.10
  12  18 -20    0.60    1.10
 -12  20 -22    1.60    1.50
 -12 -20  22    1.20    1.90
  12 -20  22    0.50    1.60
  12 -20  22   -0.60    1.40
  12 -20  22    3.30    1.90
  12  20 -22    2.20    1.70
 -12 -22  24   -0.80    1.80
 -12  22 -24    0.70    1.40
  12 -22  24    0.40    1.60
  12 -22  24    0.20    1.60
  12 -22  24    5.10    2.50
  12  22 -24    4.20    2.10
 -13 -23  21    4.20    2.30
 -13  23 -21    2.80    1.70
  13  23 -21    3.00    2.00
  13 -23  21    2.10    1.70
  13 -23  21    0.60    1.60
  13 -23  21    2.00    2.00
 -13 -21  19    4.40    2.20
 -13  21 -19    3.60    1.80
  13 -21  19    4.60    1.80
  13 -21  19    6.40    2.10
  13  21 -19    5.60    2.00
  13 -21  19    5.30    2.20
 -13 -19  17    1.00    1.70
 -13  19 -17    1.50    1.40
  13  19 -17   -2.20    1.40
  13 -19  17   -0.10    1.40
  13 -19  17    0.40    1.30
  13 -19  17   -2.70    1.30
 -13 -17  15   -1.20    1.40
 -13  17 -15    1.80    1.30
  13 -17  15    0.20    1.20
  13  17 -15   -0.80    0.90
  13 -17  15   -1.80    1.10
  13 -17  15    0.80    1.40
  13  17 -15   -0.70    1.20
 -13 -15  13   19.60    2.60
 -13  15 -13   14.20    2.20
  13  15 -13   16.40    2.20
  13 -15  13   15.10    2.20
  13 -15  13   17.60    2.30
  13  15 -13   13.50    1.80
  13 -15  13   13.40    2.20
 -13  13 -11   30.30    2.80
 -13 -13  11   26.20    3.00
  13 -13  11   27.50    2.80
  13 -13  11   31.80    2.70
  13 -13  11   25.70    2.60
  13  13 -11   30.00    2.60
  13  13 -11   32.00    2.30
 -13 -11   9    0.30    1.20
 -13  11  -9   -1.10    0.80
  13 -11   9   -0.10    0.90
  13  11  -9    0.80    1.10
  13 -11   9    0.20    0.90
  13  11  -9    0.70    0.70
  13 -11   9    0.60    0.90
 -13  -9   7    1.10    1.10
 -13   9  -7    1.90    1.10
  13  -9   7    1.00    1.00
  13  -9   7    1.90    1.00
  13  -9   7    0.80    0.80
  13   9  -7    2.20    0.70
  13   9  -7    1.30    1.00
 -13  -7   5    0.20    0.90
  13  -7   5    0.70    0.70
  13  -7   5   -1.00    0.70
  13   7  -5    0.90    0.60
  13  -7   5   -0.50    0.60
  13   7  -5    0.90    0.80
 -13   5  -3    8.10    1.10
 -13  -5   3   11.20    1.70
  13  -5   3    7.90    1.40
  13  -5   3    8.50    1.30
  13  -5   3    5.90    0.90
  13   5  -3    7.30    0.90
  13   5  -3    7.30    1.30
 -13  -3   1   19.30    1.90
 -13   3  -1   17.80    1.70
  13  -3   1   21.30    2.00
  13   3  -1   16.20    1.10
  13  -3   1   17.60    1.30
  13   3  -1   19.70    2.00
 -13   1   1    6.40    1.20
 -13  -1  -1    6.20    1.10
  13  -1  -1    6.30    1.10
  13  -1  -1    3.60    0.90
  13   1   1    4.50    0.60
  13   1   1    6.50    1.10
  13  -1  -1    4.60    0.70
  13   1   1    2.70    1.00
 -13   1  -3    4.90    0.90
 -13  -1   3    4.20    1.00
  13  -1   3    4.40    0.70
  13   1  -3    3.40    0.90
  13   1  -3    4.10    0.70
  13   1  -3    4.40    1.00
  13  -1   3    5.70    1.10
 -13  -3   5    2.50    1.00
 -13   3  -5    5.20    0.90
  13  -3   5    3.60    1.10
  13   3  -5    3.10    0.70
  13  -3   5    3.90    0.70
  13  -3   5    3.40    0.90
  13   3  -5    2.50    0.90
 -13   5  -7   27.20    1.70
 -13  -5   7   26.80    2.30
  13  -5   7   26.30    2.10
  13   5  -7   30.70    2.10
  13  -5   7   29.00    1.80
  13  -5   7   26.30    2.10
  13   5  -7   27.30    1.70
 -13  -7   9    1.40    1.00
  13   7  -9    0.40    0.60
  13  -7   9    1.40    0.80
  13   7  -9    0.10    0.70
  13  -7   9   -1.00    0.70
  13  -7   9    0.10    0.80
 -13  -9  11    6.60    1.70
 -13   9 -11    5.50    1.40
  13  -9  11    8.30    1.60
  13  -9  11    6.30    1.30
  13   9 -11    7.40    1.20
  13  -9  11    5.80    1.50
  13   9 -11    9.40    1.50
 -13  11 -13   -0.40    1.00
 -13 -11  13   -1.30    1.10
  13 -11  13   -1.10    0.90
  13 -11  13   -0.50    1.00
  13  11 -13   -0.20    1.00
  13  11 -13    0.20    0.80
  13 -11  13    0.50    0.90
 -13 -13  15   -0.20    1.30
 -13  13 -15    0.70    1.10
  13  13 -15    0.30    1.20
  13 -13  15   -0.80    1.00
  13 -13  15    1.90    1.30
  13  13 -15    0.00    0.90
  13 -13  15   -0.90    1.00
 -13  15 -17    1.40    1.30
 -13 -15  17    0.60    1.70
  13 -15  17    2.10    1.40
  13  15 -17    2.40    1.50
  13  15 -17    3.00    1.20
  13 -15  17    0.70    1.40
  13 -15  17    1.50    1.50
 -13 -17  19    2.40    1.80
 -13  17 -19    1.10    1.40
  13 -17  19    2.20    1.50
  13  17 -19    1.50    1.50
  13  17 -19   -0.20    1.10
  13 -17  19    1.00    1.70
  13 -17  19   -0.10    1.40
 -13 -19  21   -1.90    1.60
 -13  19 -21    2.20    1.40
  13 -19  21   -0.90    1.60
  13  19 -21    0.20    1.20
  13 -19  21    3.50    1.70
  13 -19  21    1.20    1.50
  13  19 -21   -1.00    1.50
 -13 -21  23   -0.90    1.70
 -13  21 -23    0.50    1.50
  13 -21  23   -0.30    1.50
  13  21 -23    0.80    1.90
  13 -21  23   -0.20    1.60
  13  21 -23   -1.60    1.10
  13 -21  23    1.80    2.00
 -14 -22  20    4.30    2.30
 -14  22 -20    3.50    1.80
  14 -22  20    1.00    1.90
  14  22 -20    0.30    1.70
  14 -22  20    3.00    2.00
  14 -22  20    0.50    1.40
 -14  20 -18   -0.30    1.20
 -14 -20  18   -3.40    1.40
  14 -20  18   -0.70    1.50
  14 -20  18   -2.90    1.20
  14 -20  18    0.70    1.70
  14  20 -18   -0.50    1.50
 -14 -18  16    3.40    2.00
 -14  18 -16    4.40    1.70
  14 -18  16    2.10    1.60
  14 -18  16    2.90    1.80
  14  18 -16    4.30    1.80
  14 -18  16    4.00    1.70
 -14  16 -14    7.50    1.80
 -14 -16  14    6.70    2.00
  14  16 -14    5.30    1.70
  14 -16  14    8.90    2.00
  14 -16  14    9.90    2.00
  14 -16  14    9.00    1.90
  14  16 -14    5.50    1.70
 -14 -14  12   45.10    3.80
 -14  14 -12   55.19    3.60
  14 -14  12   44.30    3.30
  14  14 -12   48.70    3.20
  14 -14  12   49.80    3.50
  14  14 -12   47.40    3.30
  14 -14  12   52.59    3.40
 -14 -12  10   14.00    2.30
 -14  12 -10   16.00    2.20
  14 -12  10   17.50    2.10
  14 -12  10   18.10    2.40
  14 -12  10   16.60    2.10
  14  12 -10   18.10    2.20
  14  12 -10   20.20    2.10
 -14 -10   8    0.00    1.10
 -14  10  -8    1.50    1.10
  14 -10   8    1.60    1.00
  14  10  -8    1.90    1.20
  14 -10   8    2.20    1.10
  14 -10   8    1.70    1.20
  14  10  -8    1.70    0.90
 -14  -8   6   32.60    2.70
  14  -8   6   33.50    2.20
  14  -8   6   33.00    2.50
  14  -8   6   32.70    2.40
  14   8  -6   30.90    2.40
 -14  -6   4    3.10    1.30
  14  -6   4    2.50    0.80
  14  -6   4    1.30    0.90
  14   6  -4    4.70    1.20
  14  -6   4    1.90    1.10
 -14   4  -2    3.20    0.90
 -14  -4   2    3.10    1.10
  14  -4   2    2.70    0.70
  14  -4   2    3.70    1.00
  14   4  -2    2.40    1.00
 -14   2   0   26.10    1.90
 -14  -2   0   23.80    2.20
  14  -2   0   22.10    1.50
  14  -2   0   24.70    1.90
  14   2   0   26.20    2.00
  14   2   0   23.30    1.90
 -14   0  -2   32.70    2.20
 -14   0   2   28.90    2.20
  14   0  -2   30.60    1.70
  14   0  -2   35.00    2.30
  14   0   2   30.30    2.20
  14   0  -2   30.40    2.10
  14   0   2   33.30    2.30
 -14   2  -4    1.20    0.70
 -14  -2   4    2.30    1.00
  14   2  -4    0.30    0.50
  14   2  -4    0.80    0.80
  14  -2   4    0.10    0.70
  14  -2   4    2.40    1.00
 -14  -4   6    0.50    0.90
 -14   4  -6    0.60    0.70
  14   4  -6    0.20    0.80
  14  -4   6    0.80    0.90
  14   4  -6    0.80    0.60
  14  -4   6    0.60    0.80
 -14  -6   8    3.00    1.30
  14   6  -8    3.40    0.90
  14  -6   8    1.50    1.00
  14  -6   8    3.50    1.30
  14   6  -8    4.40    1.20
 -14  -8  10   23.10    2.60
  14   8 -10   27.20    2.30
  14   8 -10   25.70    1.90
  14  -8  10   24.30    2.50
  14  -8  10   29.20    2.30
  14  -8  10   27.00    2.60
 -14  10 -12    8.80    1.70
 -14 -10  12    7.80    1.80
  14 -10  12    6.10    1.60
  14  10 -12    7.10    1.60
  14 -10  12    6.40    1.40
  14  10 -12    8.60    1.40
  14 -10  12    7.50    1.60
 -14 -12  14   12.70    2.40
 -14  12 -14   10.30    1.90
  14 -12  14   11.80    2.10
  14  12 -14    9.60    1.60
  14 -12  14    8.00    1.80
  14  12 -14   14.40    2.00
  14 -12  14   14.20    2.10
 -14 -14  16    1.80    1.60
 -14  14 -16    1.00    1.30
  14 -14  16    0.50    1.40
  14  14 -16   -0.70    1.10
  14 -14  16    2.30    1.30
  14 -14  16   -0.60    1.20
  14  14 -16    1.20    1.10
 -14  16 -18    9.80    2.10
 -14 -16  18    8.40    2.30
  14 -16  18   10.60    2.20
  14 -16  18    9.30    2.00
  14  16 -18   11.50    2.10
  14 -16  18   10.70    2.50
  14  16 -18    9.50    1.80
 -14  18 -20    0.10    1.50
 -14 -18  20    3.40    1.90
  14  18 -20    0.10    1.20
  14 -18  20   -2.70    1.40
  14  18 -20   -0.20    1.60
  14 -18  20    0.10    1.30
 -14 -20  22    4.80    2.20
 -14  20 -22    2.00    1.60
  14  20 -22    0.80    1.30
  14  20 -22    1.00    1.70
  14 -20  22    0.40    1.80
  14 -20  22    4.70    1.80
 -15 -21  19    4.00    2.30
 -15  21 -19    5.70    1.90
  15  21 -19    8.30    2.30
  15 -21  19    2.40    1.60
  15 -21  19    4.10    2.10
 -15 -19  17    0.60    1.80
 -15  19 -17    2.20    1.60
  15 -19  17    1.60    1.80
  15 -19  17    2.70    1.60
  15  19 -17   -1.10    1.70
 -15  17 -15    8.60    2.00
 -15 -17  15    3.90    2.10
  15 -17  15    6.90    1.80
  15 -17  15    7.60    2.20
  15  17 -15    7.30    1.90
  15 -17  15    4.50    2.10
 -15 -15  13   13.10    2.50
 -15  15 -13   15.20    2.30
  15 -15  13   14.10    2.20
  15 -15  13    9.40    1.90
  15  15 -13   12.70    2.20
  15 -15  13   11.00    2.20
 -15  13 -11   12.20    2.00
 -15 -13  11   10.00    2.10
  15  13 -11    8.90    1.80
  15 -13  11   10.60    1.90
  15 -13  11   12.10    2.10
  15 -13  11    6.50    1.70
 -15  11  -9   11.60    1.90
 -15 -11   9   15.60    2.40
  15 -11   9   17.90    2.30
  15  11  -9   17.40    2.20
  15 -11   9   13.20    1.90
  15 -11   9   13.50    2.00
 -15   9  -7    1.10    1.00
 -15  -9   7    2.50    1.30
  15  -9   7    2.50    1.00
  15  -9   7    3.40    1.40
  15  -9   7    0.40    1.00
  15   9  -7    2.50    1.20
 -15  -7   5   12.60    2.00
  15  -7   5   10.50    1.50
  15  -7   5   10.80    1.70
  15   7  -5   12.30    1.90
  15  -7   5   11.90    1.90
 -15  -5   3   -1.50    0.90
 -15   5  -3    0.20    1.00
  15  -5   3   -0.10    0.80
  15   5  -3    1.00    0.90
  15  -5   3   -0.40    0.80
  15  -5   3    0.10    0.70
 -15   3  -1   64.49    3.20
 -15  -3   1   65.99    3.60
  15  -3   1   66.59    3.40
  15   3  -1   61.29    3.40
  15   3  -1   66.39    3.50
 -15  -1  -1   54.29    3.10
 -15   1   1   55.59    3.00
  15   1   1   52.89    3.20
  15  -1  -1   52.29    2.90
  15   1   1   47.20    2.90
 -15   1  -3    4.00    1.10
 -15  -1   3    4.20    1.20
  15   1  -3    3.50    1.10
  15  -1   3    2.60    1.10
  15   1  -3    3.40    1.10
 -15   3  -5    2.20    0.90
 -15  -3   5    2.80    1.20
  15  -3   5    2.60    1.20
  15   3  -5    3.00    1.10
  15  -3   5    4.20    1.10
 -15  -5   7    1.50    1.10
  15   5  -7   -0.80    0.70
  15  -5   7   -0.50    0.80
  15  -5   7    0.30    1.00
  15   5  -7    0.80    1.00
 -15  -7   9    2.80    1.30
  15  -7   9    6.00    1.40
  15   7  -9    3.80    1.10
  15  -7   9    6.00    1.50
  15   7  -9    5.10    1.40
 -15  -9  11    9.40    2.00
 -15   9 -11   10.10    1.80
  15  -9  11    8.90    1.80
  15   9 -11    9.60    1.70
  15  -9  11    8.80    1.70
  15   9 -11    9.20    1.40
 -15  11 -13   -1.10    1.00
 -15 -11  13    0.90    1.40
  15  11 -13    0.70    1.20
  15 -11  13   -0.50    1.00
  15  11 -13    0.00    0.90
  15 -11  13   -0.10    1.00
 -15  13 -15   -0.40    1.10
 -15 -13  15   -0.80    1.40
  15  13 -15    0.80    1.40
  15 -13  15   -0.20    1.20
  15  13 -15    0.70    1.10
  15 -13  15   -0.20    1.20
 -15  15 -17   -1.10    1.20
 -15 -15  17   -0.20    1.70
  15 -15  17    1.30    1.30
  15 -15  17    1.90    1.50
  15  15 -17    0.00    1.40
  15  15 -17   -0.90    1.40
 -15  17 -19   -0.20    1.30
 -15 -17  19    2.50    1.90
  15 -17  19    0.70    1.50
  15  17 -19    1.30    1.70
  15 -17  19    3.00    1.60
 -15  19 -21    0.30    1.40
 -15 -19  21    1.10    1.80
  15 -19  21   -0.40    1.70
  15 -19  21   -1.60    1.30
  15  19 -21   -1.10    1.60
 -16 -20  18    0.00    2.10
 -16  20 -18    1.00    1.50
  16 -20  18    0.50    1.70
  16  20 -18    2.90    1.90
  16 -20  18   -0.40    1.70
 -16 -18  16    1.50    1.90
 -16  18 -16    1.40    1.30
  16 -18  16   -1.20    1.30
  16 -18  16   -0.80    1.40
  16  18 -16    0.20    1.60
 -16  16 -14   -1.80    1.00
 -16 -16  14    2.80    1.90
  16 -16  14   -2.40    1.00
  16  16 -14    0.00    1.40
  16 -16  14   -1.50    1.40
 -16 -14  12   -0.50    1.50
 -16  14 -12    0.10    1.20
  16 -14  12   -0.90    1.30
  16  14 -12    0.50    1.40
  16 -14  12    1.40    1.40
 -16 -12  10   -1.40    1.30
 -16  12 -10    1.20    1.30
  16 -12  10    1.40    1.20
  16  12 -10    0.80    1.20
  16 -12  10    0.40    1.20
 -16  10  -8   -0.60    1.00
 -16 -10   8   -1.60    1.20
  16 -10   8   -1.70    1.00
  16 -10   8    3.60    1.30
  16  10  -8    0.10    1.20
 -16  -8   6    2.20    1.40
  16   8  -6    0.00    1.10
  16  -8   6    1.90    1.30
  16  -8   6    0.40    1.00
 -16  -6   4   16.20    2.20
  16  -6   4   18.10    2.30
  16   6  -4   15.70    2.10
  16  -6   4   15.10    1.90
 -16   4  -2    0.20    0.80
 -16  -4   2    1.60    1.10
  16  -4   2   -0.50    0.80
  16   4  -2   -0.80    0.90
  16  -4   2    0.70    0.90
  16   4  -2    0.00    0.90
 -16  -2   0    2.40    1.10
 -16   2   0    0.70    0.90
  16   2   0    1.90    1.10
  16  -2   0    0.90    1.00
  16   2   0    2.00    1.00
 -16   0   2   -0.30    0.90
 -16   0  -2    0.20    0.90
  16   0   2    1.00    1.00
  16   0  -2    2.50    1.00
  16   0  -2    1.50    1.00
 -16   2  -4   12.80    1.60
 -16  -2   4   12.00    1.80
  16   2  -4    9.20    1.50
  16  -2   4   10.20    1.70
  16  -2   4   17.20    2.10
  16   2  -4   15.30    1.90
 -16  -4   6    0.10    1.00
  16  -4   6    3.10    1.20
  16  -4   6    0.00    0.90
  16   4  -6   -0.40    0.80
 -16  -6   8    2.30    1.50
  16  -6   8    7.30    1.60
  16  -6   8    2.90    1.30
  16   6  -8    6.20    1.50
 -16  -8  10   -0.60    1.20
  16   8 -10    0.90    1.10
  16  -8  10   -0.50    1.10
  16  -8  10    0.80    1.10
 -16  10 -12    1.40    1.30
 -16 -10  12    1.00    1.50
  16 -10  12    0.00    1.20
  16 -10  12    0.00    1.10
  16  10 -12    1.00    1.30
 -16  12 -14    2.80    1.40
 -16 -12  14    5.40    2.00
  16 -12  14    4.20    1.60
  16 -12  14    2.80    1.40
  16  12 -14    2.20    1.40
 -16 -14  16    1.10    1.60
 -16  14 -16   -0.20    1.20
  16 -14  16   -0.60    1.30
  16 -14  16   -0.60    1.20
  16  14 -16    0.90    1.40
 -16  16 -18    2.50    1.60
 -16 -16  18   -0.30    1.80
  16 -16  18   -0.20    1.30
  16 -16  18   -1.20    1.50
  16  16 -18    0.40    1.60
 -16  18 -20    0.60    1.40
 -16 -18  20    1.70    2.00
  16 -18  20    0.80    1.70
  16 -18  20    2.60    1.80
  16  18 -20    0.70    1.70
 -17 -19  17    0.70    2.10
 -17  19 -17    0.50    1.40
  17  19 -17    0.10    1.80
  17 -19  17   -1.10    1.40
  17 -19  17   -0.20    1.70
 -17  17 -15    3.20    1.60
 -17 -17  15    1.50    2.00
  17 -17  15    5.80    2.00
  17  17 -15    6.20    2.00
  17 -17  15    2.40    1.70
 -17  15 -13   -1.40    1.20
 -17 -15  13    2.30    1.90
  17  15 -13    0.00    1.50
  17 -15  13   -1.20    1.10
  17 -15  13   -0.10    1.40
 -17 -13  11    0.80    1.70
 -17  13 -11   -0.10    1.10
  17 -13  11    1.80    1.20
  17  13 -11   -0.30    1.30
  17 -13  11    2.30    1.50
 -17 -11   9    1.10    1.60
 -17  11  -9    1.50    1.20
  17 -11   9    1.20    1.40
  17  11  -9    0.40    1.30
  17 -11   9    1.70    1.30
 -17  -9   7    5.00    1.80
  17  -9   7    4.20    1.40
  17  -9   7    3.00    1.50
  17   9  -7    2.30    1.40
 -17  -7   5    0.50    1.30
  17  -7   5   -0.40    1.00
  17  -7   5    0.50    1.20
  17   7  -5    1.30    1.20
 -17  -5   3    2.80    1.40
  17   5  -3    3.30    1.40
  17  -5   3    0.70    1.20
  17  -5   3    2.90    1.20
 -17  -3   1   12.60    2.00
 -17   3  -1   14.40    1.80
  17   3  -1   12.40    1.90
  17  -3   1   14.00    1.90
  17   3  -1   16.40    2.20
 -17  -1  -1   19.40    2.20
 -17   1   1   16.10    2.00
  17   1   1   18.60    2.20
  17  -1  -1   15.30    2.00
  17   1   1   20.00    2.30
 -17   1  -3    1.10    1.00
 -17  -1   3    1.40    1.10
  17   1  -3    1.90    1.10
  17   1  -3    0.20    0.90
  17  -1   3    2.40    1.20
 -17  -3   5   -0.70    1.10
  17  -3   5    2.80    1.30
  17  -3   5    1.20    1.10
  17   3  -5    3.80    1.20
  17   3  -5    0.60    1.00
 -17  -5   7    0.80    1.20
  17   5  -7    0.70    1.00
  17  -5   7   -0.30    1.00
  17  -5   7    0.10    1.00
 -17  -7   9    8.60    2.00
  17  -7   9   14.40    2.30
  17  -7   9    7.00    1.70
  17   7  -9   13.40    2.00
 -17   9 -11   -0.20    1.10
 -17  -9  11   -0.60    1.40
  17  -9  11    0.90    1.20
  17  -9  11    0.20    1.10
  17   9 -11   -0.70    1.20
 -17  11 -13    3.10    1.40
 -17 -11  13   -1.50    1.60
  17 -11  13    3.00    1.40
  17  11 -13    3.70    1.50
  17 -11  13    1.70    1.50
 -17 -13  15   -2.50    1.40
 -17  13 -15    1.10    1.40
  17  13 -15    0.50    1.30
  17 -13  15    0.00    1.50
  17 -13  15    0.50    1.30
 -17  15 -17    2.50    1.60
 -17 -15  17   -0.80    1.80
  17  15 -17   -0.50    1.40
  17 -15  17    0.90    1.40
  17 -15  17    3.30    1.80
 -17 -17  19    3.80    2.10
 -17  17 -19    0.10    1.40
  17  17 -19    3.30    1.80
  17 -17  19    3.50    1.80
  17 -17  19    0.70    1.70
 -18  18 -16    1.80    1.80
 -18 -18  16    1.40    2.20
  18 -18  16    1.60    1.80
  18 -18  16    3.20    1.70
  18  18 -16    1.40    1.80
 -18  16 -14   11.10    2.30
 -18 -16  14    9.90    2.70
  18 -16  14    7.00    2.00
  18  16 -14    9.50    2.20
  18 -16  14   13.20    2.60
 -18  14 -12    5.60    1.70
 -18 -14  12    5.10    2.30
  18  14 -12    7.10    2.10
  18 -14  12    3.00    1.60
  18 -14  12    8.20    2.30
 -18  12 -10    0.80    1.20
 -18 -12  10   -1.30    1.50
  18  12 -10    0.70    1.40
  18 -12  10    0.50    1.50
  18 -12  10    0.50    1.30
 -18 -10   8    2.50    1.70
 -18  10  -8    1.00    1.20
  18  10  -8   -0.80    1.40
  18 -10   8    2.80    1.40
  18 -10   8    1.10    1.40
 -18  -8   6   11.10    2.20
  18  -8   6    8.20    1.90
  18   8  -6    4.50    1.60
  18  -8   6    9.20    1.80
 -18  -6   4   -0.20    1.40
  18  -6   4    3.00    1.40
  18  -6   4    1.70    1.10
  18   6  -4    2.90    1.40
 -18  -4   2    1.10    1.30
  18   4  -2    0.70    1.00
  18  -4   2    0.10    1.00
  18  -4   2   -0.50    1.00
  18   4  -2   -0.60    1.00
 -18   2   0   41.80    3.00
 -18  -2   0   39.60    3.10
  18   2   0   44.20    3.10
  18   2   0   47.20    3.20
  18  -2   0   38.00    2.90
 -18   0   2   49.99    3.30
 -18   0  -2   47.40    3.20
  18   0   2   45.60    3.20
  18   0  -2   48.90    3.20
 -18  -2   4    1.40    1.30
  18   2  -4    3.00    1.30
  18   2  -4   -0.20    1.00
  18  -2   4    1.50    1.20
  18  -2   4    3.00    1.40
 -18  -4   6    1.40    1.40
  18   4  -6    0.00    1.10
  18  -4   6   -1.30    0.90
  18  -4   6   -1.40    1.00
 -18  -6   8    3.60    1.70
  18  -6   8    0.30    1.10
  18   6  -8    1.10    1.30
  18  -6   8    1.70    1.40
 -18  -8  10    4.30    2.00
  18  -8  10    4.20    1.50
  18   8 -10    6.60    1.70
  18  -8  10    2.90    1.40
 -18 -10  12   -1.30    1.60
 -18  10 -12   -0.90    1.10
  18 -10  12   -0.50    1.10
  18  10 -12    0.00    1.40
  18 -10  12   -0.10    1.40
 -18 -12  14   -1.10    1.60
 -18  12 -14   -0.20    1.40
  18  12 -14    1.10    1.50
  18 -12  14    1.30    1.30
  18 -12  14   -0.30    1.40
 -18  14 -16    0.80    1.30
 -18 -14  16   -1.00    1.90
  18  14 -16   -0.80    1.50
  18 -14  16   -1.50    1.40
  18 -14  16    1.00    1.50
 -18 -16  18   13.00    2.90
 -18  16 -18    9.80    2.20
  18 -16  18    7.00    2.10
  18 -16  18   10.00    2.40
  18  16 -18    7.70    2.20
 -19  17 -15   -0.50    1.40
 -19 -17  15   -0.30    1.90
  19 -17  15    0.90    1.60
  19 -17  15    4.60    3.30
  19  17 -15    2.60    1.80
 -19  15 -13    8.40    2.10
 -19 -15  13   14.50    3.00
  19 -15  13   11.00    2.50
  19  15 -13   12.50    2.40
  19 -15  13   11.80    2.30
 -19  13 -11    0.20    1.30
 -19 -13  11    2.70    2.00
  19  13 -11    2.40    1.80
  19 -13  11    1.00    1.50
  19 -13  11    3.20    1.70
 -19  11  -9    1.10    1.30
 -19 -11   9   -1.30    1.50
  19  11  -9   -0.80    1.50
  19 -11   9    0.60    1.30
  19 -11   9   -1.70    1.00
 -19  -9   7   10.80    2.30
  19  -9   7   18.00    2.60
  19   9  -7   17.50    2.50
  19  -9   7    9.30    1.80
 -19  -7   5    0.60    1.50
  19  -7   5    0.10    1.10
  19   7  -5    1.40    1.40
  19  -7   5    0.70    1.30
 -19  -5   3    0.10    1.30
  19   5  -3    1.30    1.30
  19  -5   3    0.20    1.10
  19   5  -3    1.20    1.20
  19  -5   3   -0.20    1.10
 -19  -3   1    6.00    1.80
  19   3  -1    7.50    1.90
  19   3  -1    3.60    1.40
  19  -3   1    3.40    1.40
 -19  -1  -1   65.49    3.90
 -19   1   1   62.99    3.90
  19  -1  -1   67.19    3.90
  19   1   1   66.89    3.90
 -19  -1   3    1.30    1.30
 -19   1  -3   -0.40    1.20
  19   1  -3   -0.60    1.00
  19  -1   3   -1.20    1.00
  19   1  -3    0.50    1.20
 -19  -3   5    4.00    1.60
  19   3  -5    1.90    1.30
  19  -3   5    1.30    1.20
  19  -3   5    1.60    1.30
  19   3  -5    2.30    1.30
 -19  -5   7   -2.10    1.30
  19  -5   7   -0.40    1.10
  19   5  -7   -1.90    1.00
  19  -5   7    1.00    1.20
 -19  -7   9    0.90    1.70
  19  -7   9    1.50    1.40
  19  -7   9    1.70    1.50
  19   7  -9    2.40    1.40
 -19  -9  11   -2.20    1.60
 -19   9 -11   -2.20    1.10
  19   9 -11    0.00    1.30
  19  -9  11    1.00    1.30
  19  -9  11   -0.10    1.30
 -19  11 -13   -0.70    1.20
 -19 -11  13    2.00    2.00
  19 -11  13    0.80    1.50
  19 -11  13    3.40    1.50
  19  11 -13    3.20    1.70
 -19  13 -15    0.30    1.40
 -19 -13  15    0.00    2.00
  19  13 -15    2.20    1.70
  19 -13  15    1.50    1.70
  19 -13  15   -0.20    1.30
 -19 -15  17    7.40    2.60
 -19  15 -17    5.90    1.90
  19 -15  17    7.50    2.10
  19 -15  17   10.20    2.40
 -20 -16  14    0.70    2.30
 -20  16 -14    4.60    1.90
  20 -16  14    6.20    2.00
  20  16 -14    0.50    1.80
 -20 -14  12    0.60    2.20
 -20  14 -12    1.60    1.50
  20 -14  12    1.40    1.40
  20 -14  12    0.00    1.60
  20  14 -12   -1.10    1.70
 -20  12 -10    0.30    1.40
 -20 -12  10    3.50    2.30
  20 -12  10    0.20    1.60
  20 -12  10    2.00    1.40
  20  12 -10    0.60    1.60
 -20 -10   8   -0.80    1.60
 -20  10  -8    1.00    1.40
  20 -10   8   -0.10    1.10
  20  10  -8    1.70    1.60
  20 -10   8   -1.00    1.30
 -20  -8   6    2.10    1.80
  20   8  -6    2.10    1.60
  20  -8   6    2.00    1.40
  20  -8   6    0.10    1.30
 -20  -6   4    0.50    1.60
  20   6  -4    0.90    1.20
  20  -6   4    1.80    1.30
  20   6  -4    1.20    1.40
  20  -6   4    1.80    1.30
 -20  -4   2   38.50    3.50
  20  -4   2   29.60    3.10
  20   4  -2   27.30    2.80
  20   4  -2   32.50    3.30
  20  -4   2   28.80    2.90
 -20  -2   0    0.00    1.20
  20  -2   0    2.90    1.40
  20   2   0    2.90    1.50
  20   2   0    0.90    1.20
 -20   0   2    4.30    1.60
 -20   0  -2    4.80    1.50
  20   0   2    0.90    1.30
  20   0  -2    1.10    1.20
 -20  -2   4    2.40    1.50
  20   2  -4    3.10    1.40
  20  -2   4    4.40    1.60
  20   2  -4    3.10    1.40
  20  -2   4    3.60    1.60
 -20  -4   6    4.60    1.90
  20   4  -6    3.80    1.40
  20   4  -6    4.20    1.60
  20  -4   6    5.60    1.80
  20  -4   6    1.70    1.30
 -20  -6   8    3.90    1.90
  20  -6   8    2.20    1.30
  20  -6   8    1.90    1.50
  20   6  -8    3.20    1.50
 -20  -8  10   -2.10    1.70
  20  -8  10    0.30    1.20
  20   8 -10   -0.20    1.30
  20  -8  10    1.00    1.40
 -20  10 -12   -0.60    1.30
 -20 -10  12   -1.50    1.70
  20  10 -12    0.20    1.90
  20 -10  12    0.70    1.30
  20 -10  12    0.70    1.30
 -20  12 -14    9.10    2.20
 -20 -12  14    4.70    2.30
  20 -12  14    7.80    2.10
  20 -12  14    6.70    1.90
 -20 -14  16   -1.30    2.00
 -20  14 -16    0.20    1.30
  20 -14  16    0.20    1.50
  20 -14  16   -0.40    1.70
 -21  15 -13    4.80    1.90
 -21 -15  13    3.80    2.50
  21 -15  13    4.10    1.80
  21  15 -13    1.00    1.90
 -21 -13  11    1.50    2.30
 -21  13 -11    5.90    1.90
  21 -13  11    3.70    1.80
  21 -13  11    8.30    2.20
  21  13 -11    6.60    2.20
 -21 -11   9    0.50    2.10
 -21  11  -9    3.40    1.70
  21 -11   9    3.10    1.60
  21 -11   9    3.50    1.70
  21  11  -9    2.20    1.90
 -21  -9   7    1.50    1.90
  21  -9   7   -1.10    1.20
  21  -9   7    0.30    1.40
  21   9  -7    0.00    1.50
 -21  -7   5    3.50    2.00
  21  -7   5    3.70    1.80
  21   7  -5    4.00    1.80
  21   7  -5    1.00    1.30
  21  -7   5    3.20    1.50
 -21  -5   3    2.30    1.80
  21  -5   3    4.70    1.60
  21   5  -3    4.40    1.70
  21   5  -3    4.10    1.60
  21  -5   3    4.20    1.80
 -21  -3   1    3.50    1.60
  21   3  -1    2.60    1.60
  21  -3   1    3.90    1.60
  21   3  -1    3.60    1.50
  21  -3   1    0.30    1.30
 -21  -1  -1    9.30    2.00
  21  -1  -1    8.90    1.90
  21   1   1    9.40    1.90
 -21  -1   3   10.10    2.20
  21  -1   3   19.20    2.60
  21  -1   3   15.30    2.40
  21   1  -3   18.30    2.40
 -21  -3   5    8.00    2.20
  21   3  -5    5.60    1.60
  21   3  -5    9.50    2.00
  21  -3   5    3.30    1.60
  21  -3   5    5.40    1.70
 -21  -5   7   -0.70    1.70
  21   5  -7   -0.20    1.30
  21  -5   7    1.20    1.30
  21   5  -7    0.00    1.20
  21  -5   7   -0.50    1.20
 -21  -7   9   13.40    2.60
  21  -7   9   13.30    2.40
  21  -7   9    5.90    1.90
 -21  -9  11    0.60    2.00
 -21   9 -11    0.70    1.40
  21  -9  11    1.00    1.40
  21  -9  11    0.70    1.40
 -21  11 -13    0.80    1.40
 -21 -11  13    0.90    2.20
  21 -11  13   -1.40    1.40
  21 -11  13    0.00    1.30
 -21 -13  15    3.10    2.50
 -21  13 -15    0.40    1.60
  21 -13  15   -0.10    1.40
 -22  12 -10   11.80    2.40
 -22 -12  10    6.30    2.60
  22 -12  10    6.60    2.00
  22  12 -10    8.70    2.50
 -22 -10   8   11.60    2.90
 -22  10  -8   10.90    2.30
  22 -10   8    7.80    2.00
  22  10  -8   12.60    2.50
  22 -10   8    8.90    2.30
 -22  -8   6    0.40    1.80
  22  -8   6    1.80    1.60
  22   8  -6    2.40    1.50
  22   8  -6    1.40    1.80
  22  -8   6   -0.20    1.30
 -22  -6   4   -2.40    1.60
  22   6  -4    0.40    1.30
  22   6  -4    1.20    1.70
  22  -6   4   -2.00    1.20
  22  -6   4    0.60    1.50
 -22  -4   2    1.70    1.70
  22  -4   2    0.20    1.20
  22   4  -2    1.90    1.70
  22  -4   2    0.10    1.40
  22   4  -2    2.90    1.50
 -22  -2   0   18.70    2.80
  22  -2   0   18.40    2.50
  22   2   0   16.50    2.50
  22   0   2    3.50    1.50
  22   0  -2    5.20    1.70
  22   0   2    3.40    1.70
 -22  -2   4   -1.70    1.40
  22   2  -4    0.50    1.10
  22  -2   4    0.70    1.40
  22  -2   4    0.70    1.30
 -22  -4   6   -2.40    1.70
  22  -4   6    0.60    1.40
  22   4  -6   -1.20    1.20
  22  -4   6    0.80    1.40
 -22  -6   8   22.80    3.40
  22   6  -8   14.60    2.40
  22  -6   8   21.50    2.90
  22  -6   8   14.20    2.60
 -22  -8  10    3.80    2.30
  22  -8  10    1.50    1.50
  22  -8  10    2.30    1.50
 -22 -10  12    5.40    2.60
 -22  10 -12    6.10    2.00
  22 -10  12    0.50    1.50
  22 -10  12    2.20    1.60
  22 -12  14   -3.00    1.30
 -23 -11   9    0.00    2.10
 -23  11  -9    1.30    1.60
  23 -11   9   -1.10    1.40
 -23   9  -7    3.90    1.80
 -23  -9   7   12.40    3.10
  23   9  -7    2.40    1.60
  23  -9   7    4.90    2.30
  23   9  -7    5.90    3.00
  23  -9   7    4.80    1.80
 -23  -7   5    0.30    2.10
  23  -7   5    0.30    1.40
  23  -7   5    1.20    1.60
  23   7  -5   -0.20    1.30
  23   7  -5    2.90    1.80
 -23  -5   3    3.70    2.10
  23  -5   3    0.10    1.40
  23   5  -3    0.70    1.40
  23  -5   3   -0.10    1.30
  23   5  -3    3.90    1.90
 -23  -3   1    1.70    1.80
  23  -3   1    2.10    1.60
  23   3  -1    1.50    1.40
  23  -3   1    2.50    1.50
  23   1   1    9.10    2.10
  23  -1  -1   13.40    2.30
  23   1  -3    1.40    1.50
  23  -1   3    1.40    1.60
  23  -1   3    2.00    1.50
 -23  -3   5   -0.10    1.80
  23  -3   5    2.50    1.60
  23   3  -5    1.40    1.30
  23  -3   5    1.20    1.60
 -23  -5   7    0.30    1.80
  23  -5   7   -0.40    1.20
  23  -5   7    3.40    1.70
  23   5  -7    0.60    1.40
 -23  -7   9    4.90    2.40
  23   7  -9    7.00    1.90
  23  -7   9    6.70    2.10
  23  -7   9    2.60    1.70
 -23   9 -11    2.20    1.80
 -23  -9  11    5.90    2.70
  23  -9  11    1.00    1.60
 -24  -8   6    0.10    2.20
  24  -8   6    0.40    1.40
  24   8  -6   -0.40    1.40
 -24  -6   4    0.50    2.00
  24  -6   4   -0.80    1.40
  24   6  -4    1.20    1.50
 -24  -4   2   -1.10    1.80
  24   4  -2   -0.20    1.30
  24  -4   2    1.50    1.60
  24  -4   2    0.30    1.30
  24   2   0   -0.60    1.40
  24  -2   0   -0.10    1.30
  24  -2   0    0.00    1.40
  24   0   2    3.10    1.70
  24   0   2    3.00    1.60
  24   0  -2    2.80    1.60
  24   2  -4    0.10    1.40
  24  -2   4   -1.20    1.30
  24  -2   4    0.30    1.40
 -24  -4   6    0.50    2.10
  24  -4   6    1.40    1.60
  24   4  -6    0.10    1.40
  24  -4   6    3.10    1.80
 -24  -6   8    1.60    2.20
  24  -6   8   -2.10    1.30
  24   6  -8   -0.90    1.30
  25  -1  -1   -0.10    1.50
  25   1   1   -0.60    1.30
  25   1  -3   -0.40    1.40
  25  -1   3   -1.10    1.40
   0 -26  22    4.50    1.90
   0  26 -22    0.80    1.50
   0  24 -20   -0.40    1.30
   0 -24  20    4.40    1.70
   0  22 -18   41.20    3.40
   0 -22  18   41.50    3.30
   0 -22  18   38.20    3.80
   0 -20  16    8.10    1.90
   0 -20  16   12.20    2.00
   0  20 -16   12.40    2.00
   0 -18  14   43.40    3.20
   0 -18  14   46.40    3.00
   0  18 -14   47.90    3.00
   0 -16  12   27.50    2.20
   0 -16  12   31.30    2.50
   0 -16  12   27.10    1.90
   0  16 -12   28.90    2.20
   0 -14  10   43.80    2.20
   0 -14  10   40.80    2.70
   0 -14  10   43.90    2.40
   0  14 -10   40.50    2.40
   0  12  -8   -0.30    0.60
   0 -12   8    0.60    0.80
   0 -12   8    0.20    0.70
   0 -12   8    0.40    0.70
   0  10  -6    1.10    0.70
   0 -10   6    1.30    0.70
   0 -10   6    1.80    0.80
   0 -10   6    1.20    0.60
   0   8  -4   86.89    3.20
   0  -8   4   90.49    3.30
   0  -8   4   82.19    3.10
   0  -8   4   76.29    2.90
   0   6  -2  229.78    7.30
   0  -6   2  236.58    7.40
   0  -6   2  226.08    7.10
   0  -6   2  233.78    7.20
   0  -4   0   65.49    2.20
   0  -4   0   65.29    2.10
   0   4   0   68.69    2.20
   0  -4   0   66.29    2.30
   0  -2  -2  295.87    8.90
   0  -2  -2  299.07    8.90
   0   0  -4  272.97    7.90
   0   0   4  262.97    7.90
   0   0   4  255.67    7.90
   0   2  -6   15.00    0.80
   0  -2   6   15.90    0.90
   0  -2   6   14.50    0.90
   0  -2   6   15.20    0.90
   0  -4   8    0.50    0.40
   0   4  -8   -0.30    0.30
   0  -4   8   -0.10    0.40
   0  -4   8    0.80    0.40
   0   6 -10   49.30    2.20
   0  -6  10   48.70    2.30
   0  -6  10   47.90    2.10
   0  -6  10   53.89    2.30
   0  -8  12   22.10    1.70
   0  -8  12   20.40    1.50
   0   8 -12   21.50    1.50
   0  -8  12   20.30    1.60
   0 -10  14   42.60    2.50
   0 -10  14   42.80    2.40
   0 -10  14   42.30    2.20
   0  10 -14   40.60    2.30
   0  12 -16   75.19    3.40
   0 -12  16   65.89    3.20
   0 -12  16   73.99    3.60
   0 -12  16   73.09    3.60
   0 -14  18  190.58    7.40
   0 -14  18  198.38    7.40
   0 -14  18  191.88    7.00
   0  14 -18  193.28    7.30
   0  16 -20   24.50    2.40
   0 -16  20   20.20    2.40
   0  18 -22   -0.30    1.20
   0 -18  22   -0.50    1.20
   0  20 -24   -0.70    1.30
   0 -20  24    1.30    1.50
   0  22 -26    1.90    1.60
   0 -22  26   -0.80    1.60
   0  24 -28    4.10    2.10
   0 -24  28    5.70    2.20
  -1  27 -23    1.00    1.70
  -1 -27  23    0.20    1.70
   1  27 -23    1.60    1.70
   1 -27  23    0.90    1.60
  -1 -25  21    2.60    1.70
  -1  25 -21   -1.90    1.30
   1  25 -21   -1.20    1.40
   1 -25  21    3.30    1.70
  -1  23 -19   13.50    2.20
  -1 -23  19   17.80    2.50
   1 -23  19   21.00    2.70
   1  23 -19   17.70    2.30
   1 -23  19   23.70    3.20
  -1 -21  17   16.30    2.60
  -1  21 -17   12.70    2.00
  -1 -21  17   17.50    2.30
   1 -21  17   19.50    2.70
   1 -21  17   17.00    2.30
   1  21 -17   13.50    2.00
  -1 -19  15   10.90    1.80
  -1 -19  15   11.20    2.00
  -1  19 -15   10.90    1.70
   1 -19  15   10.50    2.00
   1  19 -15   12.00    1.80
   1 -19  15   11.00    1.80
  -1 -17  13    5.90    1.60
  -1  17 -13    4.70    1.20
  -1 -17  13    5.30    1.10
  -1 -17  13    4.00    1.20
   1  17 -13    3.40    1.20
   1 -17  13    5.90    1.50
   1 -17  13    2.90    1.20
  -1  15 -11   40.40    2.50
  -1 -15  11   41.40    2.80
  -1 -15  11   42.50    2.50
  -1 -15  11   41.40    2.30
   1 -15  11   40.60    2.50
   1 -15  11   38.00    2.40
   1  15 -11   42.00    2.50
   1 -15  11   39.50    2.70
   1 -15  11   42.30    2.10
  -1 -13   9   49.50    2.80
  -1  13  -9   51.59    2.60
  -1 -13   9   47.70    2.50
  -1 -13   9   46.20    2.40
   1  13  -9   47.70    2.50
   1 -13   9   51.49    2.60
   1 -13   9   48.90    2.20
   1 -13   9   48.30    2.80
   1 -13   9   51.79    2.60
  -1 -11   7    1.30    0.90
  -1 -11   7   -0.10    0.70
  -1  11  -7    0.10    0.70
  -1 -11   7    0.70    0.60
   1 -11   7   -0.70    0.60
   1 -11   7    0.30    0.70
   1 -11   7    0.80    0.80
   1  11  -7   -0.60    0.60
   1 -11   7    0.90    0.60
  -1  -9   5    9.50    1.00
  -1   9  -5    8.90    1.00
  -1  -9   5    6.80    0.80
  -1  -9   5    9.60    1.10
   1  -9   5   11.00    1.00
   1   9  -5    8.60    1.00
   1  -9   5    8.20    0.70
   1  -9   5    9.60    1.10
   1  -9   5    9.10    1.00
  -1  -7   3  136.49    4.50
  -1   7  -3  140.89    4.60
  -1  -7   3  137.19    4.50
  -1  -7   3  135.19    4.70
   1  -7   3  135.09    4.60
   1  -7   3  141.19    4.40
   1   7  -3  140.59    4.60
   1  -7   3  136.79    4.80
   1  -7   3  136.79    4.60
  -1  -5   1  274.47    8.40
  -1  -5   1  273.87    8.30
  -1   5  -1  272.17    8.30
  -1  -5   1  269.47    8.30
   1  -5   1  274.97    8.40
   1  -5   1  267.17    8.30
   1   5  -1  273.67    8.40
   1  -5   1  278.17    8.30
   1  -5   1  264.37    8.20
  -1  -3  -1  110.49    3.40
  -1  -3  -1  108.89    3.50
  -1   3   1  108.39    3.40
   1   3   1  109.19    3.50
   1  -3  -1  108.49    3.40
   1  -3  -1  113.59    3.50
   1  -3  -1  109.89    3.40
  -1  -1  -3   33.40    1.20
   1   1   3   33.60    1.10
   1   1   3   32.60    1.20
   1   1   3   33.50    1.20
  -1  -1   5   20.40    1.10
  -1  -1   5   22.60    0.90
  -1  -1   5   19.90    1.00
   1  -1   5   21.50    1.00
   1  -1   5   19.50    0.90
   1   1  -5   20.80    0.80
  -1  -3   7    5.00    0.70
  -1  -3   7    4.60    0.60
  -1   3  -7    2.90    0.50
  -1  -3   7    3.20    0.50
   1  -3   7    3.60    0.60
   1   3  -7    3.90    0.50
   1  -3   7    3.90    0.60
  -1  -5   9    0.90    0.50
  -1   5  -9   -0.10    0.40
  -1  -5   9    0.30    0.40
  -1  -5   9    0.50    0.50
   1  -5   9    0.60    0.50
   1  -5   9   -0.10    0.40
   1   5  -9    0.50    0.40
   1  -5   9    0.70    0.40
   1  -5   9   -0.60    0.40
  -1   7 -11    5.70    0.90
  -1  -7  11    7.80    1.00
  -1  -7  11    9.50    1.20
  -1  -7  11    7.00    1.00
   1  -7  11   10.10    1.20
   1  -7  11    6.20    1.00
   1  -7  11    9.80    1.20
   1   7 -11    5.10    0.80
   1  -7  11    7.60    0.90
  -1  -9  13    0.10    0.80
  -1  -9  13   -0.80    0.70
  -1  -9  13    0.60    0.80
  -1   9 -13    0.60    0.70
   1  -9  13   -0.80    0.70
   1   9 -13    1.00    0.70
   1  -9  13    1.70    0.80
   1  -9  13    0.00    0.80
   1  -9  13    0.30    0.70
  -1 -11  15    4.10    1.00
  -1 -11  15    4.60    1.10
  -1  11 -15    4.40    1.00
  -1 -11  15    5.60    1.00
   1 -11  15    5.50    1.00
   1  11 -15    6.30    1.10
   1 -11  15    5.20    1.10
   1 -11  15    5.40    1.10
  -1 -13  17   74.59    3.60
  -1 -13  17   71.79    3.70
  -1  13 -17   75.19    3.60
   1 -13  17   76.69    3.40
   1 -13  17   75.29    3.70
   1  13 -17   78.19    3.70
   1 -13  17   81.29    3.80
  -1 -15  19   93.29    4.50
  -1  15 -19   95.99    4.40
  -1 -15  19   94.59    4.30
   1  15 -19   87.09    4.30
   1 -15  19   95.89    4.60
   1 -15  19   92.19    4.60
  -1 -17  21   -0.20    1.20
  -1  17 -21   -2.00    0.90
   1  17 -21    1.20    1.10
   1 -17  21    0.10    1.10
   1 -17  21    1.00    1.30
  -1  19 -23    1.00    1.30
  -1 -19  23    0.40    1.40
   1 -19  23    1.30    1.40
   1  19 -23   -0.80    1.20
  -1 -21  25    1.70    1.60
  -1  21 -25    1.70    1.50
   1  21 -25    1.40    1.70
   1 -21  25   -0.10    1.50
  -1 -23  27   -0.30    1.70
  -1  23 -27   -0.90    1.50
   1  23 -27    0.70    1.60
   1 -23  27   -0.90    1.60
  -1 -25  29    1.80    2.00
  -1  25 -29    0.20    1.80
   1  25 -29   -2.40    1.50
   1 -25  29    0.70    1.90
  -2 -26  22    0.60    1.70
  -2  26 -22    1.10    1.70
   2  26 -22   -1.00    1.50
   2 -26  22   -0.40    1.50
  -2 -24  20   -0.30    1.40
  -2  24 -20    0.00    1.30
   2 -24  20    0.00    1.50
   2  24 -20    1.90    1.60
   2 -24  20   -0.50    1.60
  -2  22 -18   -0.40    1.10
  -2 -22  18    2.20    1.50
   2  22 -18    0.40    1.30
   2 -22  18    4.70    1.80
   2 -22  18    0.00    1.30
  -2  20 -16    8.20    1.70
  -2 -20  16    6.80    1.70
   2  20 -16    4.20    1.40
   2 -20  16    9.00    1.90
   2 -20  16    4.60    1.60
  -2 -18  14    5.50    1.30
  -2  18 -14    4.90    1.30
  -2 -18  14    2.50    1.30
  -2 -18  14    7.00    1.60
   2 -18  14    8.70    1.60
   2 -18  14    6.00    1.40
   2 -18  14    7.10    1.70
   2  18 -14    3.30    1.20
  -2  16 -12    4.30    1.20
  -2 -16  12    2.60    1.00
  -2 -16  12    3.50    1.20
  -2 -16  12    2.60    1.10
   2 -16  12    2.70    1.00
   2  16 -12    1.10    0.90
   2 -16  12    2.50    1.20
   2 -16  12    3.00    1.10
  -2 -14  10    4.80    1.10
  -2 -14  10    6.40    1.10
  -2 -14  10    5.70    1.30
  -2  14 -10    8.70    1.30
   2  14 -10    5.20    1.00
   2 -14  10    4.10    1.30
   2 -14  10    8.70    1.30
   2 -14  10    6.60    0.90
   2 -14  10    5.10    1.10
  -2  12  -8    2.10    0.90
  -2 -12   8    1.00    0.90
  -2 -12   8    2.00    0.80
  -2 -12   8    2.60    0.90
   2 -12   8    3.30    0.90
   2 -12   8    2.80    0.90
   2 -12   8    3.10    0.60
   2  12  -8    1.30    0.80
   2 -12   8    4.70    1.10
  -2 -10   6   44.10    2.10
  -2  10  -6   42.70    2.20
  -2 -10   6   42.20    2.10
  -2 -10   6   44.80    2.40
   2 -10   6   42.40    2.10
   2 -10   6   44.10    2.20
   2 -10   6   44.70    2.40
   2 -10   6   43.80    1.80
   2  10  -6   41.80    2.10
  -2  -8   4    9.90    1.00
  -2  -8   4   10.80    1.10
  -2  -8   4   10.80    1.00
  -2   8  -4   11.90    1.00
   2  -8   4   10.50    1.10
   2  -8   4   11.00    0.90
   2   8  -4   11.90    1.00
   2  -8   4   13.90    1.00
   2  -8   4   10.20    0.70
  -2   6  -2  107.89    3.80
  -2  -6   2  114.59    3.90
  -2  -6   2  112.29    3.90
  -2  -6   2  115.19    3.70
   2  -6   2  112.59    3.80
   2  -6   2  114.89    3.50
   2   6  -2  108.89    3.80
   2  -6   2  111.89    3.90
   2  -6   2  117.69    3.80
  -2  -4   0    0.30    0.30
  -2  -4   0    0.40    0.40
  -2   4   0   -0.20    0.20
   2  -4   0    0.40    0.30
   2  -4   0    0.10    0.30
   2  -4   0    0.30    0.30
   2   4   0    0.10    0.30
  -2  -2  -2   30.70    1.20
   2  -2  -2   32.60    1.20
  -2   0   4    0.50    0.30
  -2   0  -4    0.50    0.20
   2   0  -4   -0.10    0.20
   2   0   4    0.40    0.30
   2   0   4    0.00    0.30
  -2   2  -6   23.40    1.00
  -2  -2   6   22.90    1.30
   2  -2   6   21.70    1.20
   2  -2   6   22.90    1.10
   2   2  -6   24.50    1.00
   2  -2   6   23.30    1.20
  -2  -4   8   69.69    2.70
  -2  -4   8   70.49    2.70
  -2   4  -8   66.29    2.60
   2  -4   8   67.29    2.70
   2   4  -8   66.09    2.50
   2  -4   8   67.89    2.70
   2  -4   8   71.49    2.70
  -2  -6  10    3.90    0.80
  -2  -6  10    4.50    0.80
  -2   6 -10    3.80    0.80
   2  -6  10    3.00    0.70
   2  -6  10    3.20    0.80
   2  -6  10    4.90    0.80
   2   6 -10    4.40    0.70
  -2  -8  12   13.40    1.50
  -2   8 -12   11.60    1.30
  -2  -8  12    8.80    1.20
   2  -8  12   12.20    1.50
   2  -8  12   11.30    1.40
   2  -8  12   12.70    1.50
   2   8 -12   10.90    1.20
  -2 -10  14   31.90    2.20
  -2  10 -14   29.70    2.00
  -2 -10  14   32.30    2.10
   2 -10  14   34.00    2.20
   2 -10  14   36.90    2.20
   2 -10  14   29.20    2.20
   2  10 -14   33.10    2.10
  -2  12 -16   21.30    1.80
  -2 -12  16   19.90    1.90
  -2 -12  16   24.70    2.30
   2 -12  16   23.00    1.90
   2 -12  16   15.10    1.80
   2  12 -16   24.00    1.80
   2 -12  16   20.70    2.10
  -2  14 -18    5.70    1.20
  -2 -14  18    3.70    1.30
  -2 -14  18    9.20    1.50
   2  14 -18    4.80    1.20
   2 -14  18    3.80    1.20
   2 -14  18    7.00    1.50
  -2  16 -20   -0.60    1.00
  -2 -16  20   -0.70    1.10
  -2 -16  20    3.30    1.20
   2 -16  20    1.90    1.30
   2 -16  20    0.30    1.10
   2  16 -20    0.20    1.00
  -2  18 -22   -0.40    1.10
  -2 -18  22   -0.90    1.30
   2  18 -22    0.10    1.20
   2 -18  22   -1.10    1.10
   2 -18  22   -0.40    1.30
  -2  20 -24   -0.70    1.20
  -2 -20  24   -2.50    1.40
   2 -20  24    0.10    1.50
   2  20 -24   -0.20    1.30
  -2  22 -26   -2.40    1.40
  -2 -22  26   -1.10    1.50
   2  22 -26    1.70    1.70
   2 -22  26   -1.80    1.40
  -2  24 -28    0.70    1.80
  -2 -24  28   -2.50    1.70
   2  24 -28   -1.20    1.70
   2 -24  28   -0.20    1.70
  -3 -27  23    6.10    2.20
  -3  27 -23    4.20    1.80
   3  27 -23    2.90    1.90
   3 -27  23    8.00    2.30
  -3  25 -21    3.30    1.70
  -3 -25  21    1.10    1.60
   3 -25  21    1.80    1.50
   3  25 -21    0.40    1.70
   3 -25  21   -0.80    1.70
  -3  23 -19    0.90    1.40
  -3 -23  19   -1.80    1.20
   3 -23  19   -0.40    1.40
   3 -23  19   -0.60    1.50
   3  23 -19    0.70    1.40
  -3  21 -17    3.80    1.40
  -3 -21  17    4.00    1.50
   3 -21  17    2.10    1.60
   3 -21  17    1.70    1.40
   3  21 -17    2.80    1.40
  -3 -19  15   -1.10    1.00
  -3 -19  15   -2.40    0.90
  -3  19 -15   -3.00    0.80
   3 -19  15    0.50    1.20
   3  19 -15   -0.80    0.90
   3 -19  15   -0.20    1.10
   3 -19  15    0.30    1.00
  -3 -17  13   38.70    2.60
  -3 -17  13   40.70    3.00
  -3  17 -13   35.60    2.60
  -3 -17  13   40.60    2.70
   3  17 -13   38.00    2.60
   3 -17  13   37.30    2.90
   3 -17  13   35.10    2.60
   3 -17  13   33.50    2.60
  -3 -15  11   16.80    1.80
  -3 -15  11   16.60    2.00
  -3  15 -11   16.00    1.70
  -3 -15  11   15.90    1.70
   3  15 -11   14.80    1.60
   3 -15  11   16.20    1.80
   3 -15  11   14.20    1.70
   3 -15  11   15.80    2.00
  -3  13  -9   55.99    2.80
  -3 -13   9   53.99    2.70
  -3 -13   9   57.99    2.90
  -3 -13   9   54.09    3.00
   3 -13   9   63.69    3.20
   3 -13   9   57.89    2.80
   3  13  -9   56.29    2.80
   3 -13   9   49.00    2.10
   3 -13   9   52.59    2.70
  -3 -11   7   43.60    2.50
  -3 -11   7   41.20    2.20
  -3 -11   7   43.10    2.30
  -3  11  -7   43.00    2.30
   3 -11   7   38.00    1.70
   3 -11   7   43.40    2.50
   3 -11   7   43.70    2.30
   3 -11   7   46.40    2.30
   3  11  -7   43.40    2.30
  -3  -9   5    4.70    0.80
  -3  -9   5    4.90    0.90
  -3   9  -5    5.60    0.80
  -3  -9   5    4.90    0.90
   3   9  -5    3.50    0.80
   3  -9   5    4.60    0.80
   3  -9   5    4.30    0.40
   3  -9   5    3.80    0.70
   3  -9   5    5.30    1.00
  -3  -7   3   77.09    3.00
  -3   7  -3   77.99    2.90
  -3  -7   3   75.99    2.90
   3  -7   3   74.29    2.80
   3  -7   3   77.49    3.00
   3  -7   3   74.49    2.90
   3   7  -3   75.69    2.90
  -3   5  -1   21.90    1.10
  -3  -5   1   20.70    1.10
  -3  -5   1   20.90    1.20
   3  -5   1   19.20    1.10
   3  -5   1   20.70    1.10
   3   5  -1   21.00    1.10
   3  -5   1   20.10    1.10
  -3   3   1   39.40    1.40
  -3   3   1   35.90    1.40
  -3  -3  -1   38.00    1.40
  -3  -3  -1   39.10    1.60
   3  -3  -1   37.50    1.40
   3  -3  -1   38.60    1.50
   3   3   1   38.90    1.50
  -3  -1  -3   14.70    0.80
  -3   1   3   15.70    0.90
   3  -1  -3   13.40    0.60
   3   1   3   14.80    0.80
   3  -1  -3   14.50    0.80
   3   1   3   14.80    0.80
  -3  -1   5   16.80    1.10
  -3   1  -5   15.60    0.80
   3   1  -5   16.50    0.80
   3  -1   5   16.50    0.80
   3  -1   5   17.30    1.00
   3   1  -5   17.20    0.90
   3  -1   5   17.50    1.00
  -3   3  -7   98.79    3.20
  -3   3  -7   98.69    3.50
  -3  -3   7   99.59    3.70
   3  -3   7  102.79    3.60
   3  -3   7  103.09    3.60
   3   3  -7   96.79    3.30
   3  -3   7  101.99    3.50
  -3  -5   9   35.90    1.80
  -3  -5   9   33.60    1.80
  -3   5  -9   33.70    1.70
   3  -5   9   31.90    1.70
   3  -5   9   33.00    1.80
   3   5  -9   31.40    1.50
   3  -5   9   30.60    1.70
  -3  -7  11    5.60    1.10
  -3  -7  11    5.70    1.10
  -3   7 -11    7.10    1.00
   3  -7  11    4.50    0.90
   3   7 -11    5.10    0.80
   3  -7  11    6.10    1.10
   3  -7  11    5.00    1.00
  -3  -9  13  110.49    4.50
  -3  -9  13  106.69    4.50
  -3   9 -13  110.19    4.40
   3  -9  13  117.99    4.60
   3   9 -13  111.89    4.30
   3  -9  13  114.59    4.60
   3  -9  13  117.89    4.60
  -3  11 -15   -0.60    0.60
  -3 -11  15    0.80    0.80
  -3 -11  15    0.10    0.80
   3 -11  15    2.10    0.90
   3 -11  15    0.70    0.90
   3  11 -15    0.60    0.70
   3 -11  15    0.80    0.80
  -3  13 -17   50.29    2.90
  -3 -13  17   55.39    3.20
  -3 -13  17   51.69    3.00
   3 -13  17   55.99    3.10
   3 -13  17   53.49    3.20
   3  13 -17   50.49    2.90
   3 -13  17   55.39    3.10
  -3 -15  19   -0.90    0.90
  -3  15 -19   -0.40    0.90
  -3 -15  19    1.00    1.20
   3 -15  19    2.10    1.10
   3  15 -19   -0.30    1.00
   3 -15  19    0.20    1.10
  -3  17 -21    2.70    1.30
  -3 -17  21    3.10    1.40
  -3 -17  21    2.40    1.40
   3 -17  21    0.40    1.10
   3 -17  21    3.80    1.50
   3  17 -21    1.90    1.30
  -3 -19  23    7.80    1.90
  -3  19 -23    7.60    1.80
   3  19 -23    6.40    1.80
   3 -19  23    6.30    1.90
   3 -19  23    7.20    1.80
  -3 -21  25    2.40    1.70
  -3  21 -25    0.60    1.60
   3 -21  25    0.10    1.50
   3  21 -25    1.40    1.50
   3 -21  25    0.80    1.30
  -3 -23  27    0.80    1.70
  -3  23 -27    0.70    1.70
   3  23 -27   -1.00    1.70
   3 -23  27    0.30    1.70
  -4  26 -22    5.30    1.90
   4 -26  22    9.00    2.30
   4  26 -22    3.10    1.90
  -4 -24  20    6.00    1.90
  -4  24 -20    5.50    1.90
   4  24 -20    4.50    1.90
   4 -24  20    5.90    2.00
   4 -24  20    8.00    2.30
  -4 -22  18    7.10    1.90
  -4  22 -18    8.10    1.80
   4  22 -18    7.00    1.80
   4 -22  18    9.30    2.10
   4 -22  18    5.70    1.90
   4 -22  18    6.00    1.70
  -4  20 -16   -0.40    1.10
  -4 -20  16    0.60    1.20
  -4 -20  16   -1.70    1.10
   4  20 -16    0.20    1.20
   4 -20  16    0.30    1.30
   4 -20  16   -0.70    1.10
   4 -20  16   -2.10    1.10
  -4  18 -14    2.80    1.10
  -4 -18  14    2.40    1.30
  -4 -18  14    4.50    1.40
   4  18 -14    4.80    1.30
   4 -18  14    3.40    1.50
   4 -18  14    5.20    1.40
   4 -18  14    5.80    1.40
  -4  16 -12   26.60    2.10
  -4 -16  12   25.90    2.20
  -4 -16  12   26.00    2.20
   4 -16  12   27.10    2.20
   4 -16  12   31.20    2.50
   4 -16  12   26.00    2.20
   4  16 -12   24.10    2.10
  -4  14 -10   52.39    2.80
  -4 -14  10   53.49    2.80
  -4 -14  10   46.90    2.90
  -4 -14  10   50.09    2.70
   4  14 -10   46.30    2.60
   4 -14  10   43.10    2.80
   4 -14  10   50.49    2.80
   4 -14  10   52.49    2.80
  -4 -12   8    2.50    0.80
  -4 -12   8    4.40    1.10
  -4 -12   8    2.10    0.90
  -4  12  -8    4.30    1.00
   4 -12   8    2.40    0.90
   4 -12   8    1.60    0.40
   4  12  -8    2.30    0.80
   4 -12   8    1.30    0.80
   4 -12   8    1.80    0.90
  -4  10  -6   18.30    1.50
  -4 -10   6   17.80    1.70
  -4 -10   6   17.10    1.60
   4  10  -6   17.10    1.40
   4 -10   6   17.60    1.50
   4 -10   6   18.30    1.60
   4 -10   6   16.60    1.40
  -4  -8   4    9.70    1.10
  -4  -8   4    9.30    1.10
  -4   8  -4   11.00    1.10
   4  -8   4    8.90    1.00
   4  -8   4   11.60    1.10
   4  -8   4   11.60    1.10
   4   8  -4   10.00    1.00
  -4  -6   2   -0.60    0.40
  -4  -6   2    0.50    0.40
  -4   6  -2   -0.10    0.40
   4  -6   2    0.00    0.40
   4  -6   2    0.20    0.40
   4   6  -2    0.00    0.40
   4  -6   2    0.10    0.40
  -4  -4   0    5.70    0.70
  -4   4   0    7.20    0.60
  -4   4   0    7.40    0.70
   4  -4   0    6.20    0.70
   4   4   0    6.50    0.70
   4  -4   0    8.60    0.70
  -4  -2  -2  201.78    6.20
  -4   2   2  199.58    6.20
   4  -2  -2  191.78    6.10
   4  -2  -2  188.58    6.00
  -4   0   4    8.70    0.90
  -4   0  -4    9.90    0.70
   4   0  -4    9.20    0.60
   4   0   4    9.50    0.80
   4   0  -4    9.50    0.70
   4   0   4    9.40    0.70
   4   0   4    9.70    0.80
  -4   2  -6    6.90    0.60
  -4  -2   6    6.00    0.80
   4   2  -6    6.90    0.60
   4  -2   6    6.70    0.80
   4  -2   6    7.30    0.80
   4  -2   6    6.50    0.60
   4   2  -6    5.80    0.70
  -4   4  -8    0.10    0.20
  -4  -4   8   -0.40    0.50
  -4   4  -8    0.10    0.50
   4  -4   8   -0.20    0.50
   4  -4   8   -0.50    0.40
   4  -4   8    0.60    0.50
   4   4  -8    0.30    0.40
  -4  -6  10   20.90    1.60
  -4   6 -10   23.40    1.50
  -4   6 -10   21.30    1.00
   4  -6  10   23.00    1.60
   4   6 -10   21.90    1.30
   4  -6  10   25.50    1.60
   4  -6  10   21.80    1.60
  -4  -8  12   18.90    1.80
  -4   8 -12   14.50    1.50
  -4  -8  12   15.90    1.70
   4  -8  12   15.90    1.60
   4  -8  12   16.50    1.60
   4  -8  12   15.70    1.60
   4   8 -12   16.40    1.40
  -4  10 -14   15.00    1.70
  -4 -10  14   14.30    1.70
  -4 -10  14   15.00    1.70
   4 -10  14   14.50    1.70
   4  10 -14   17.80    1.50
   4 -10  14   13.40    1.60
   4 -10  14   16.90    1.70
  -4 -12  16   -1.00    0.70
  -4 -12  16    1.40    1.00
  -4  12 -16   -0.70    0.70
   4 -12  16   -0.70    0.80
   4 -12  16    0.80    0.90
   4  12 -16    0.30    0.70
   4 -12  16   -0.60    0.70
  -4  14 -18   16.80    1.90
  -4 -14  18   12.10    1.90
  -4 -14  18   20.40    2.20
   4 -14  18   18.60    2.20
   4  14 -18   16.10    1.80
   4 -14  18   20.20    2.30
   4 -14  18   15.50    2.00
  -4 -16  20   15.10    2.10
  -4 -16  20   19.90    2.40
  -4  16 -20   15.60    2.10
   4 -16  20   14.00    2.00
   4  16 -20   11.30    1.80
   4 -16  20   19.10    2.50
  -4 -18  22    0.80    1.40
  -4  18 -22   -0.30    1.20
  -4 -18  22    0.70    1.40
   4 -18  22   -0.60    1.10
   4  18 -22    0.20    1.20
   4 -18  22   -1.50    1.30
  -4  20 -24    6.20    1.80
  -4 -20  24    5.70    1.90
   4 -20  24    5.80    1.80
   4 -20  24    5.30    1.90
   4  20 -24    3.90    1.60
  -4 -22  26    1.20    1.70
  -4  22 -26    2.60    1.70
   4 -22  26   -0.80    1.70
   4 -22  26    0.10    1.30
   4  22 -26    0.40    1.50
  -4  24 -28    1.60    1.80
   4 -24  28    8.00    2.40
   4  24 -28    5.40    2.10
  -5  27 -23   -0.10    1.60
   5 -27  23    3.30    2.00
   5  27 -23    3.90    2.00
  -5  25 -21   -0.30    1.40
   5  25 -21   -0.30    1.50
   5 -25  21   -2.90    1.50
   5 -25  21    2.90    1.80
  -5  23 -19   10.60    2.10
   5 -23  19   12.70    2.50
   5 -23  19    7.10    1.90
   5  23 -19   11.90    2.20
   5 -23  19   11.20    2.30
  -5  21 -17    3.80    1.50
  -5 -21  17    4.60    1.70
   5  21 -17    0.70    1.30
   5 -21  17    5.10    1.80
   5 -21  17    4.10    1.40
   5 -21  17    2.40    1.60
  -5  19 -15    3.00    1.30
  -5 -19  15    4.90    1.60
   5 -19  15    6.60    1.60
   5  19 -15    2.70    1.20
   5 -19  15    3.60    1.50
   5 -19  15    5.70    1.70
  -5 -17  13    3.20    1.20
  -5  17 -13    1.40    1.10
   5 -17  13    3.40    1.20
   5  17 -13    3.00    1.20
   5 -17  13    2.10    1.30
   5 -17  13    4.10    1.40
  -5  15 -11   49.80    2.90
  -5 -15  11   46.60    2.90
   5 -15  11   48.60    2.90
   5 -15  11   44.20    3.00
   5 -15  11   55.49    2.90
   5  15 -11   46.30    2.70
  -5 -13   9    1.80    0.90
  -5  13  -9    1.40    0.80
   5  13  -9    1.20    0.80
   5 -13   9    1.80    0.80
   5 -13   9    2.50    0.90
   5 -13   9    1.60    0.90
  -5 -11   7    0.20    0.70
  -5  11  -7   -0.50    0.60
   5  11  -7   -0.20    0.70
   5 -11   7    1.40    0.80
   5 -11   7   -0.20    0.70
   5 -11   7   -0.30    0.70
  -5   9  -5   -0.50    0.60
  -5  -9   5   -0.20    0.70
   5  -9   5   -0.40    0.70
   5  -9   5   -0.40    0.70
   5   9  -5    0.20    0.60
   5  -9   5    0.50    0.60
  -5   7  -3   11.20    1.00
  -5  -7   3   10.30    1.10
   5  -7   3   11.50    1.00
   5  -7   3   10.50    1.10
   5  -7   3   10.30    1.00
   5   7  -3    8.50    0.90
  -5   5  -1   14.50    1.00
  -5  -5   1   13.90    1.10
  -5   5  -1   14.40    0.80
   5  -5   1   13.90    1.00
   5  -5   1   14.50    0.90
   5  -5   1   15.40    1.10
   5   5  -1   13.20    1.00
  -5   3   1    6.70    0.70
  -5  -3  -1    5.60    0.70
   5   3   1    6.40    0.70
   5  -3  -1    4.30    0.60
   5   3   1    5.40    0.40
   5  -3  -1    5.30    0.60
  -5  -1  -3    0.20    0.40
  -5   1   3    1.00    0.50
   5  -1  -3    0.70    0.30
   5   1   3    0.40    0.40
   5   1   3    0.60    0.40
   5  -1  -3    0.70    0.30
  -5  -1   5    1.20    0.50
  -5   1  -5    1.30    0.40
   5   1  -5    0.80    0.40
   5  -1   5    0.60    0.30
   5  -1   5    1.20    0.50
   5   1  -5    1.30    0.40
   5  -1   5    0.80    0.40
  -5   3  -7   30.40    1.20
  -5  -3   7   27.80    1.70
   5   3  -7   31.80    1.50
   5  -3   7   29.60    1.60
   5  -3   7   29.90    1.40
   5   3  -7   28.60    1.40
   5  -3   7   27.40    1.50
  -5   5  -9   29.00    1.20
  -5   5  -9   32.80    1.80
  -5  -5   9   30.20    1.90
   5  -5   9   30.00    1.70
   5  -5   9   27.10    1.70
   5  -5   9   30.00    1.70
   5   5  -9   29.40    1.50
  -5   7 -11   38.40    1.50
  -5   7 -11   39.60    2.20
  -5  -7  11   42.00    2.40
   5   7 -11   38.90    2.00
   5  -7  11   41.50    2.30
   5  -7  11   38.00    2.20
   5  -7  11   40.10    2.20
  -5   9 -13   22.60    1.70
  -5   9 -13   15.90    0.90
  -5  -9  13   16.30    1.80
   5  -9  13   17.60    1.80
   5  -9  13   14.30    1.60
   5   9 -13   18.60    1.50
   5  -9  13   16.00    1.70
  -5  11 -15    5.10    1.20
  -5 -11  15   10.30    1.60
   5 -11  15    6.30    1.20
   5  11 -15    6.60    1.10
   5 -11  15    5.90    1.20
   5 -11  15    5.60    1.30
  -5  13 -17    1.10    0.90
  -5 -13  17    4.80    1.30
   5 -13  17    5.60    1.30
   5  13 -17    5.40    1.20
   5 -13  17    4.00    1.30
   5 -13  17    3.70    1.30
  -5  15 -19   36.70    2.70
  -5 -15  19   37.00    2.90
   5 -15  19   33.50    2.70
   5 -15  19   33.90    2.90
   5  15 -19   29.80    2.60
   5 -15  19   33.40    2.80
  -5 -17  21    1.30    1.40
  -5  17 -21    0.80    1.10
   5  17 -21    0.00    1.10
   5 -17  21    0.60    1.30
   5 -17  21    1.90    1.30
   5 -17  21    1.90    1.40
  -5  19 -23    0.50    1.30
  -5 -19  23    3.10    1.60
   5  19 -23    0.70    1.40
   5 -19  23    1.00    1.70
   5 -19  23    1.30    1.40
  -5  21 -25    2.60    1.60
   5  21 -25    1.50    1.70
   5 -21  25    0.40    1.70
   5 -21  25    3.50    1.60
  -5  23 -27    3.50    1.90
   5 -23  27    2.40    1.70
   5 -23  27   -0.50    1.70
   5  23 -27    0.70    1.80
  -6  26 -22    1.60    1.70
   6 -26  22    0.80    1.90
   6  26 -22    0.40    1.70
   6 -26  22    1.10    1.80
  -6  24 -20    0.90    1.40
   6 -24  20    1.60    1.30
   6 -24  20    2.00    1.70
   6 -24  20    0.50    1.60
   6  24 -20   -1.50    1.40
  -6 -22  18   -0.80    1.40
  -6  22 -18    0.60    1.20
   6 -22  18    3.10    1.80
   6 -22  18    0.00    1.20
   6 -22  18   -1.50    1.20
   6  22 -18    0.00    1.40
  -6  20 -16   -1.30    1.00
  -6 -20  16   -0.80    1.30
   6 -20  16    0.40    1.30
   6 -20  16   -1.00    1.20
   6  20 -16   -0.50    1.10
   6 -20  16   -2.00    0.90
  -6  18 -14    4.60    1.30
  -6 -18  14    4.20    1.50
   6 -18  14    2.10    1.40
   6  18 -14    4.70    1.40
   6 -18  14    3.00    1.30
   6 -18  14    3.10    1.30
  -6  16 -12    0.60    0.80
  -6 -16  12    0.20    1.00
   6 -16  12    1.20    1.10
   6  16 -12   -0.90    0.80
   6 -16  12    0.30    0.90
   6 -16  12   -0.80    1.00
  -6 -14  10    5.50    1.30
  -6  14 -10    5.60    1.10
   6  14 -10    5.70    1.10
   6 -14  10    5.40    1.30
   6 -14  10    5.40    1.20
   6 -14  10    5.00    1.20
  -6 -12   8   43.40    2.60
  -6  12  -8   45.80    2.50
   6  12  -8   44.80    2.50
   6 -12   8   43.30    2.50
   6 -12   8   46.40    2.70
   6 -12   8   45.80    2.50
  -6 -10   6    1.50    0.80
  -6  10  -6    0.30    0.70
   6 -10   6    0.60    0.70
   6 -10   6    0.60    0.70
   6  10  -6    0.90    0.70
   6 -10   6    0.10    0.80
  -6  -8   4   -1.30    0.70
  -6   8  -4   -0.20    0.60
   6  -8   4   -0.10    0.60
   6  -8   4   -0.50    0.50
   6   8  -4   -0.50    0.60
   6  -8   4    0.00    0.60
  -6  -6   2   27.80    1.70
  -6   6  -2   25.60    1.50
  -6   6  -2   23.40    1.10
   6  -6   2   26.30    1.50
   6  -6   2   25.30    1.40
   6  -6   2   26.10    1.40
   6   6  -2   24.20    1.50
  -6   4   0   -0.20    0.30
  -6  -4   0    0.10    0.50
   6   4   0    0.50    0.40
   6  -4   0    0.10    0.30
   6  -4   0   -0.40    0.40
  -6  -2  -2   21.80    1.30
  -6   2   2   26.70    1.40
   6   2   2   23.50    1.30
   6  -2  -2   23.40    1.20
   6   2   2   23.00    0.90
   6  -2  -2   23.20    1.20
  -6   0  -4    0.40    0.40
  -6   0   4   -0.10    0.40
   6   0   4   -0.40    0.40
   6   0  -4    0.10    0.30
   6   0   4    0.20    0.50
   6   0  -4    0.20    0.30
   6   0   4    0.40    0.20
  -6   2  -6   14.70    0.90
  -6  -2   6   15.40    1.40
   6  -2   6   14.60    1.10
   6   2  -6   14.80    1.00
   6   2  -6   13.40    0.90
   6  -2   6   12.80    1.10
   6  -2   6   13.80    0.90
  -6  -4   8  175.58    6.30
  -6   4  -8  178.38    5.60
   6  -4   8  175.28    5.90
   6   4  -8  177.68    5.80
   6   4  -8  184.88    6.00
   6  -4   8  177.58    6.10
   6  -4   8  172.28    6.10
  -6   6 -10   19.10    1.60
  -6  -6  10   23.20    1.90
  -6   6 -10   20.40    1.00
   6  -6  10   21.30    1.70
   6   6 -10   21.90    1.50
   6  -6  10   22.40    1.60
   6  -6  10   20.30    1.70
  -6   8 -12    1.20    0.30
  -6  -8  12    1.70    0.90
  -6   8 -12    1.60    0.80
   6  -8  12    2.40    0.90
   6   8 -12    2.50    0.80
   6  -8  12    2.40    0.90
   6  -8  12    1.70    0.80
  -6 -10  14    3.10    1.10
  -6  10 -14    2.90    0.90
   6 -10  14    3.40    1.00
   6 -10  14    5.40    1.20
   6 -10  14    4.30    1.20
   6  10 -14    3.30    0.90
  -6 -12  16    7.40    1.50
  -6  12 -16    4.50    1.10
   6 -12  16    6.80    1.40
   6 -12  16    5.20    1.30
   6  12 -16    7.20    1.30
   6 -12  16    7.40    1.40
  -6 -14  18    0.50    1.10
  -6  14 -18   -0.10    1.00
   6  14 -18    1.30    1.00
   6 -14  18    1.50    1.10
   6 -14  18    0.90    1.10
   6 -14  18    1.10    1.10
  -6 -16  20    0.10    1.30
  -6  16 -20   -0.60    1.00
   6 -16  20   -0.20    1.10
   6 -16  20   -0.10    1.10
   6  16 -20   -1.70    1.00
   6 -16  20    1.90    1.50
  -6  18 -22    2.80    1.40
  -6 -18  22    3.60    1.70
   6 -18  22    2.80    1.60
   6  18 -22    8.60    1.90
   6 -18  22    4.80    1.60
  -6 -20  24    4.40    1.90
  -6  20 -24    3.90    1.70
   6 -20  24    4.30    1.60
   6  20 -24    3.40    1.70
   6 -20  24    7.40    2.20
  -6  22 -26   -0.40    1.50
   6 -22  26    0.40    1.90
   6  22 -26    0.40    1.60
   6 -22  26   -1.00    1.40
  -6  24 -28   -0.80    1.60
   6 -24  28    3.00    1.80
   6  24 -28    2.60    1.90
   6 -24  28    4.90    2.50
  -7  25 -21    0.10    1.50
   7 -25  21    1.90    1.80
   7 -25  21    0.10    1.40
   7  25 -21    1.00    1.70
   7 -25  21   -1.80    1.60
  -7 -23  19    9.80    2.50
  -7  23 -19    5.70    1.80
   7 -23  19    7.50    2.20
   7  23 -19    8.30    2.00
   7 -23  19    9.80    2.30
   7 -23  19    7.70    1.90
  -7  21 -17    1.70    1.30
  -7 -21  17   -0.90    1.40
   7  21 -17   -0.30    1.30
   7 -21  17    1.80    1.50
   7 -21  17    3.50    1.80
   7 -21  17    2.50    1.40
  -7 -19  15    0.60    1.40
  -7  19 -15    1.00    1.00
   7 -19  15    0.00    1.10
   7  19 -15   -0.20    1.20
   7 -19  15   -0.60    1.20
   7 -19  15    0.40    1.20
  -7  17 -13   15.40    2.00
  -7 -17  13   22.80    2.50
   7 -17  13   18.60    2.20
   7 -17  13   15.00    1.90
   7 -17  13   16.80    2.20
   7  17 -13   19.20    2.10
  -7  15 -11   12.70    1.70
  -7 -15  11   13.60    1.90
   7 -15  11   14.10    1.80
   7  15 -11   16.00    1.80
   7 -15  11   18.40    2.10
   7 -15  11   17.20    2.00
  -7  13  -9   15.20    1.70
  -7 -13   9   17.40    1.90
   7 -13   9   13.50    1.60
   7  13  -9   12.90    1.50
   7 -13   9   13.30    1.70
   7 -13   9   12.30    1.60
  -7 -11   7   31.10    2.20
  -7  11  -7   29.10    2.00
   7 -11   7   29.50    2.00
   7  11  -7   30.30    1.90
   7 -11   7   32.30    2.10
   7 -11   7   31.00    2.10
  -7  -9   5    3.80    1.00
  -7   9  -5    3.70    0.90
   7  -9   5    5.30    1.00
   7  -9   5    4.90    1.00
   7  -9   5    2.70    0.90
   7   9  -5    3.30    0.90
  -7   7  -3    0.30    0.60
  -7  -7   3   -0.20    0.70
  -7   7  -3   -0.10    0.30
   7  -7   3    0.10    0.70
   7  -7   3   -0.30    0.60
   7  -7   3   -0.10    0.60
   7   7  -3    0.30    0.60
  -7   5  -1   19.90    1.10
  -7  -5   1   21.20    1.50
   7  -5   1   20.50    1.30
   7  -5   1   18.70    1.30
   7   5  -1   22.60    1.50
   7  -5   1   19.30    1.30
  -7  -3  -1   28.30    1.60
  -7   3   1   29.10    1.50
   7   3   1   26.40    1.10
   7  -3  -1   28.10    1.40
   7  -3  -1   27.90    1.40
   7   3   1   29.10    1.60
  -7   1   3    0.90    0.50
  -7  -1  -3    1.40    0.50
   7   1   3    0.30    0.20
   7   1   3    0.60    0.50
   7  -1  -3    0.60    0.40
   7  -1  -3    1.10    0.50
   7   1   3    0.50    0.50
  -7   1  -5    0.90    0.40
  -7  -1   5   -0.20    0.50
   7   1  -5    0.30    0.40
   7  -1   5   -0.10    0.50
   7  -1   5   -0.10    0.50
   7  -1   5    0.40    0.30
   7   1  -5    0.30    0.40
  -7   3  -7   82.79    2.80
  -7  -3   7   81.49    3.40
   7  -3   7   81.09    3.30
   7   3  -7   72.79    3.00
   7   3  -7   77.99    3.00
   7  -3   7   84.39    3.30
   7  -3   7   75.49    2.90
  -7   5  -9   -0.10    0.30
  -7  -5   9    0.00    0.80
   7  -5   9    0.40    0.70
   7  -5   9    1.10    0.60
   7   5  -9    0.40    0.50
   7  -5   9   -0.70    0.70
   7   5  -9    0.20    0.60
  -7   7 -11    1.20    0.70
  -7  -7  11   -0.60    0.80
  -7   7 -11    0.00    0.30
   7  -7  11   -0.40    0.70
   7  -7  11    0.10    0.60
   7   7 -11    0.20    0.60
   7  -7  11   -0.70    0.70
  -7   9 -13   82.29    3.70
  -7  -9  13   79.39    3.80
   7  -9  13   79.39    3.60
   7  -9  13   74.69    3.60
   7   9 -13   76.09    3.30
   7  -9  13   78.99    3.60
  -7 -11  15    1.30    0.90
  -7  11 -15   -0.40    0.80
   7 -11  15    0.80    0.90
   7 -11  15   -0.40    0.80
   7  11 -15    0.90    0.80
   7 -11  15    0.10    0.70
  -7  13 -17    6.80    1.40
  -7 -13  17    7.40    1.70
   7 -13  17    5.30    1.40
   7 -13  17    7.90    1.60
   7 -13  17    6.50    1.50
   7  13 -17   10.10    1.50
  -7  15 -19   11.40    1.80
  -7 -15  19   11.90    2.10
   7 -15  19    9.80    1.70
   7  15 -19   10.70    1.70
   7 -15  19    9.70    1.90
   7 -15  19   14.50    2.20
  -7  17 -21    1.60    1.30
  -7 -17  21    0.00    1.30
   7 -17  21   -1.10    1.20
   7  17 -21    2.50    1.40
   7 -17  21    1.30    1.40
   7 -17  21    0.80    1.20
  -7  19 -23   -0.80    1.20
  -7 -19  23    4.00    2.00
   7  19 -23    1.80    1.50
   7 -19  23    3.00    1.60
   7 -19  23    4.80    2.00
  -7  21 -25    2.30    1.70
   7 -21  25    2.50    1.60
   7 -21  25    1.00    1.80
   7  21 -25    1.20    1.70
  -7  23 -27   -0.40    1.60
   7  23 -27    3.10    1.90
   7 -23  27   -0.70    1.70
   7 -23  27    1.00    1.60
  -8  26 -22   -0.80    1.50
   8 -26  22    0.50    1.60
   8 -26  22    1.10    1.90
   8 -26  22    2.10    2.00
   8  26 -22    1.30    2.00
  -8  24 -20    4.90    2.00
   8 -24  20    4.10    2.00
   8  24 -20    3.10    1.90
   8 -24  20    0.60    1.50
   8 -24  20    3.90    1.90
  -8  22 -18   14.60    2.30
  -8 -22  18   17.60    2.70
   8  22 -18   15.60    2.40
   8 -22  18   17.80    2.70
   8 -22  18   11.70    2.10
   8 -22  18   13.20    2.60
  -8 -20  16    3.00    1.60
  -8  20 -16    0.10    1.10
   8 -20  16   -0.60    1.40
   8  20 -16   -0.20    1.30
   8 -20  16    3.80    1.70
   8 -20  16    0.80    1.20
  -8  18 -14    3.40    1.40
  -8 -18  14    0.80    1.30
   8 -18  14    1.30    1.20
   8  18 -14   -0.30    1.10
   8 -18  14    1.10    1.30
   8 -18  14    1.30    1.30
  -8  16 -12   10.40    1.70
  -8 -16  12    9.20    1.80
   8 -16  12    8.00    1.70
   8 -16  12    8.40    1.70
   8 -16  12   10.40    1.60
   8  16 -12   12.80    1.80
  -8 -14  10   25.80    2.50
  -8  14 -10   24.40    2.30
   8 -14  10   22.80    2.30
   8 -14  10   25.30    2.20
   8 -14  10   23.20    2.20
   8  14 -10   24.50    2.00
  -8 -12   8   23.80    2.00
  -8  12  -8   23.90    2.00
   8 -12   8   23.80    1.90
   8 -12   8   22.40    2.10
   8  12  -8   24.20    1.90
   8 -12   8   23.30    1.90
  -8  10  -6   11.60    1.40
  -8 -10   6    9.50    1.40
   8 -10   6   10.90    1.40
   8  10  -6   11.00    1.30
   8 -10   6   10.60    1.40
   8 -10   6   10.40    1.40
  -8  -8   4   60.39    3.00
  -8   8  -4   59.69    2.80
   8  -8   4   52.99    2.80
   8   8  -4   59.59    2.80
   8  -8   4   55.69    2.70
   8  -8   4   57.99    2.70
  -8  -6   2  146.99    5.30
  -8   6  -2  134.69    4.70
   8   6  -2  143.49    5.20
   8  -6   2  148.19    5.10
   8  -6   2  139.49    5.20
   8  -6   2  144.29    5.10
   8   6  -2  143.99    4.80
  -8  -4   0   22.50    1.60
  -8   4   0   23.90    1.40
   8   4   0   22.40    1.60
   8   4   0   23.20    1.10
   8  -4   0   20.90    1.40
   8  -4   0   22.00    1.30
  -8   2   2  248.58    8.00
  -8  -2  -2  247.38    8.00
   8   2   2  247.98    8.10
   8  -2  -2  239.68    7.80
   8   2   2  249.97    8.00
   8  -2  -2  238.48    7.70
   8  -2  -2  245.18    7.90
   8   2   2  232.58    7.40
  -8   0  -4  147.19    5.10
  -8   0   4  150.18    5.30
   8   0   4  149.88    5.20
   8   0  -4  148.19    5.00
   8   0   4  148.79    4.70
   8   0  -4  148.79    5.10
   8   0   4  147.19    5.30
  -8  -2   6   23.60    1.80
  -8   2  -6   25.10    1.40
   8   2  -6   23.20    1.40
   8  -2   6   26.00    1.70
   8   2  -6   25.40    1.40
   8  -2   6   22.40    1.20
   8  -2   6   23.70    1.60
  -8   4  -8   11.90    0.90
  -8  -4   8   10.30    1.40
   8   4  -8   11.70    1.10
   8   4  -8   11.30    1.10
   8  -4   8   13.10    1.40
   8  -4   8   11.20    1.10
   8  -4   8   10.70    1.30
  -8  -6  10    4.50    1.10
  -8   6 -10    3.20    0.50
   8  -6  10    2.20    0.70
   8   6 -10    2.30    0.70
   8   6 -10    2.50    0.70
   8  -6  10    2.50    0.90
   8  -6  10    3.80    1.00
  -8   8 -12   21.30    1.80
  -8  -8  12   24.50    2.10
   8   8 -12   23.70    1.60
   8  -8  12   23.70    1.90
   8   8 -12   24.00    1.70
   8  -8  12   25.10    1.80
   8  -8  12   26.10    2.00
  -8 -10  14    9.50    1.60
  -8  10 -14    6.40    1.30
   8 -10  14   10.60    1.50
   8  10 -14    8.90    1.30
   8 -10  14    9.10    1.40
   8 -10  14   11.90    1.60
  -8  12 -16    1.30    1.00
  -8 -12  16   -0.40    1.00
   8  12 -16   -0.20    0.80
   8 -12  16   -0.10    0.90
   8 -12  16    1.20    1.10
   8 -12  16    0.70    1.00
  -8  14 -18   53.19    3.40
  -8 -14  18   54.39    3.70
   8 -14  18   49.60    3.30
   8 -14  18   52.69    3.50
   8 -14  18   54.19    3.40
   8  14 -18   49.60    3.10
  -8  16 -20    5.60    1.60
  -8 -16  20    5.60    1.80
   8 -16  20    3.80    1.50
   8 -16  20    3.80    1.40
   8  16 -20    1.80    1.30
   8 -16  20    8.10    1.90
  -8 -18  22    0.00    1.50
  -8  18 -22   -0.50    1.30
   8 -18  22    0.70    1.30
   8  18 -22    1.10    1.40
   8 -18  22    0.40    1.50
   8 -18  22    1.70    1.50
  -8  20 -24    1.10    1.50
  -8 -20  24   -1.30    1.70
   8 -20  24   -0.80    1.60
   8 -20  24    1.30    1.40
   8  20 -24    2.70    1.70
  -8  22 -26    3.90    1.90
   8 -22  26    8.60    2.20
   8  22 -26    7.70    2.10
   8 -22  26    4.80    2.30
  -9  25 -21    0.10    1.50
   9 -25  21    4.50    2.10
   9 -25  21    0.30    1.80
   9 -25  21    1.70    1.50
   9  25 -21    1.40    1.80
  -9 -23  19   15.50    2.50
  -9  23 -19   13.60    2.30
   9  23 -19   13.50    2.40
   9 -23  19   14.10    2.70
   9 -23  19    9.70    2.10
   9 -23  19   14.10    2.60
  -9 -21  17    0.80    1.50
  -9  21 -17    1.40    1.30
   9 -21  17    2.40    1.40
   9 -21  17    1.60    1.50
   9 -21  17    0.30    1.40
   9  21 -17    0.30    1.40
  -9  19 -15   -0.80    1.10
  -9 -19  15    1.80    1.50
   9 -19  15    0.90    1.40
   9 -19  15   -0.40    1.20
   9 -19  15   -1.90    1.00
   9  19 -15   -0.30    1.20
  -9 -17  13    5.40    1.60
  -9  17 -13    7.80    1.60
   9  17 -13    6.10    1.50
   9 -17  13    4.70    1.60
   9 -17  13    5.00    1.40
   9 -17  13    4.70    1.50
  -9  15 -11    4.10    1.20
  -9 -15  11    4.40    1.40
   9  15 -11    1.00    1.00
   9 -15  11    4.00    1.30
   9 -15  11    2.30    1.20
   9 -15  11    2.60    1.20
  -9  13  -9   41.50    2.60
  -9 -13   9   36.50    2.70
   9  13  -9   39.60    2.50
   9 -13   9   38.70    2.60
   9 -13   9   39.30    2.70
   9 -13   9   38.50    2.60
  -9 -11   7    3.80    1.10
  -9  11  -7    4.60    1.10
   9 -11   7    3.00    1.10
   9  11  -7    4.10    1.00
   9 -11   7    3.90    1.00
   9 -11   7    4.60    1.10
  -9   9  -5   -1.20    0.60
  -9  -9   5    0.70    0.80
   9   9  -5   -0.20    0.60
   9  -9   5    0.10    0.70
   9  -9   5    0.00    0.70
   9  -9   5   -0.60    0.60
  -9  -7   3    3.40    1.00
  -9   7  -3    2.50    0.60
   9  -7   3    2.30    0.80
   9  -7   3    2.40    0.90
   9   7  -3    2.80    0.80
   9  -7   3    3.40    0.80
   9   7  -3    3.70    0.70
  -9   5  -1   13.40    1.20
  -9  -5   1   14.40    1.50
   9  -5   1   13.00    1.20
   9  -5   1   13.30    1.30
   9   5  -1   14.10    1.40
   9   5  -1   11.70    0.90
  -9   3   1   15.10    1.30
  -9  -3  -1   18.10    1.60
   9  -3  -1   14.10    1.10
   9   3   1   14.10    1.40
   9   3   1   13.90    0.80
   9  -3  -1   14.30    1.30
  -9   1   3   45.00    2.30
  -9  -1  -3   49.99    2.30
   9  -1  -3   49.99    2.30
   9   1   3   47.00    2.40
   9   1   3   46.50    1.70
   9   1   3   49.60    2.50
   9  -1  -3   47.10    2.10
  -9  -1   5    2.90    0.90
  -9   1  -5    2.80    0.70
   9   1  -5    4.00    0.80
   9  -1   5    2.10    0.80
   9  -1   5    2.70    0.90
   9  -1   5    2.70    0.50
   9   1  -5    3.10    0.70
  -9   3  -7   22.90    1.40
  -9  -3   7   20.50    1.80
   9   3  -7   22.50    1.50
   9  -3   7   22.30    1.70
   9   3  -7   21.80    1.40
   9  -3   7   22.80    1.30
   9  -3   7   24.10    1.70
  -9  -5   9   24.20    2.00
  -9   5  -9   26.80    1.30
   9   5  -9   29.40    1.70
   9  -5   9   27.60    1.90
   9  -5   9   23.00    1.50
   9  -5   9   27.30    1.90
   9   5  -9   27.40    1.70
  -9   7 -11    0.60    0.40
  -9   7 -11    0.80    0.80
  -9  -7  11    1.00    0.90
   9   7 -11   -0.50    0.60
   9   7 -11    1.20    0.70
   9  -7  11   -0.40    0.60
   9  -7  11   -0.80    0.70
   9  -7  11    0.00    0.70
  -9   9 -13   12.60    1.60
  -9  -9  13    9.90    1.60
   9  -9  13   11.40    1.50
   9  -9  13   13.70    1.70
   9  -9  13   12.60    1.60
   9   9 -13   10.70    1.40
   9   9 -13   14.90    1.50
  -9 -11  15    8.10    1.60
  -9  11 -15    6.90    1.40
   9 -11  15   10.90    1.70
   9  11 -15    8.10    1.40
   9 -11  15    9.60    1.60
   9 -11  15   10.00    1.50
  -9  13 -17    6.80    1.50
  -9 -13  17    7.30    1.70
   9 -13  17    5.90    1.50
   9 -13  17    7.30    1.70
   9  13 -17    4.90    1.30
   9 -13  17    6.60    1.50
  -9 -15  19   30.50    3.10
  -9  15 -19   21.80    2.50
   9 -15  19   24.70    2.70
   9  15 -19   25.50    2.50
   9 -15  19   28.20    3.00
   9 -15  19   35.90    2.90
  -9  17 -21    9.80    2.00
  -9 -17  21   12.20    2.40
   9 -17  21   16.80    2.50
   9  17 -21   14.80    2.20
   9 -17  21   11.80    2.10
   9 -17  21   11.60    2.10
  -9 -19  23   -0.60    1.60
  -9  19 -23    0.70    1.40
   9 -19  23    0.50    1.30
   9 -19  23    0.10    1.70
   9  19 -23    2.20    1.60
   9 -19  23    1.60    1.60
  -9  21 -25    0.20    1.30
  -9 -21  25    2.50    1.90
   9 -21  25    1.40    1.70
   9 -21  25   -0.50    1.30
   9  21 -25   -0.70    1.50
  -9  23 -27    0.90    1.60
   9 -23  27   -1.20    1.40
   9  23 -27    1.70    1.80
 -10 -24  20    2.30    1.90
 -10  24 -20   -0.20    1.50
  10 -24  20   -0.70    1.60
  10 -24  20    0.50    1.70
  10 -24  20   -2.00    1.30
  10  24 -20    0.20    1.70
 -10 -22  18    3.10    1.80
 -10  22 -18    2.20    1.50
  10 -22  18    4.50    2.00
  10 -22  18    5.30    1.90
  10 -22  18    0.00    1.30
  10  22 -18    0.30    1.60
 -10 -20  16   -0.10    1.60
 -10  20 -16   -1.20    1.10
  10 -20  16   -1.20    1.10
  10  20 -16    0.00    1.30
  10 -20  16   -1.20    1.20
  10 -20  16    0.30    1.40
 -10 -18  14    0.60    1.40
 -10  18 -14    1.20    1.20
  10 -18  14    0.10    1.30
  10 -18  14    1.70    1.20
  10  18 -14    0.40    1.20
  10 -18  14   -0.80    1.10
 -10  16 -12   -0.30    1.10
 -10 -16  12   -0.60    1.30
  10 -16  12    1.30    1.20
  10 -16  12    0.30    1.20
  10  16 -12    0.80    1.10
  10 -16  12   -0.70    1.00
 -10  14 -10    3.00    1.10
 -10 -14  10    2.40    1.30
  10 -14  10    3.10    1.20
  10 -14  10    3.00    1.30
  10  14 -10    3.90    1.30
  10 -14  10    0.10    1.10
 -10  12  -8   15.20    1.80
 -10 -12   8   13.10    1.90
  10  12  -8   12.70    1.60
  10 -12   8   14.40    1.80
  10 -12   8   17.70    2.00
  10 -12   8   15.40    1.80
 -10 -10   6   28.00    2.20
 -10  10  -6   27.50    2.00
  10 -10   6   29.80    2.10
  10 -10   6   30.30    2.10
  10 -10   6   30.40    2.10
  10  10  -6   26.50    2.00
 -10   8  -4   23.50    1.80
 -10  -8   4   23.40    1.90
 -10   8  -4   19.80    1.20
  10  -8   4   23.10    1.70
  10  -8   4   22.00    1.80
  10   8  -4   19.10    1.30
  10   8  -4   24.50    1.80
  10  -8   4   23.00    1.70
 -10   6  -2    0.10    0.50
 -10  -6   2   -0.10    0.70
  10  -6   2   -0.80    0.60
  10  -6   2    0.30    0.50
  10  -6   2   -0.80    0.50
  10   6  -2   -0.70    0.60
  10   6  -2    1.20    0.50
 -10  -4   0    1.20    0.80
 -10   4   0    0.70    0.60
  10   4   0    0.00    0.70
  10  -4   0    1.00    0.50
  10   4   0    0.70    0.40
  10  -4   0    0.90    0.60
 -10   2   2    3.00    0.80
 -10  -2  -2    2.30    0.80
  10   2   2    2.50    0.80
  10   2   2    3.80    0.50
  10   2   2    4.20    1.00
  10  -2  -2    3.40    0.80
  10  -2  -2    3.30    0.70
 -10   0   4    1.20    0.80
 -10   0  -4    0.30    0.60
  10   0   4    0.80    0.70
  10   0  -4    0.90    0.50
  10   0   4    0.70    0.40
  10   0   4    1.20    0.70
  10   0  -4    0.10    0.60
 -10  -2   6   47.70    2.60
 -10   2  -6   45.50    2.10
  10  -2   6   40.50    1.80
  10  -2   6   48.30    2.50
  10   2  -6   44.30    2.20
  10   2  -6   41.00    2.10
  10  -2   6   42.90    2.40
 -10   4  -8   53.59    2.30
 -10  -4   8   55.19    3.00
  10   4  -8   56.39    2.60
  10  -4   8   54.69    2.80
  10   4  -8   52.59    2.50
  10  -4   8   57.39    2.90
  10  -4   8   55.39    2.40
 -10  -6  10    0.90    0.80
 -10   6 -10    1.20    0.40
  10   6 -10    2.00    0.70
  10  -6  10    1.30    0.80
  10  -6  10    0.50    0.70
  10  -6  10    1.40    0.60
  10   6 -10    0.30    0.60
 -10  -8  12    1.00    1.00
 -10   8 -12    1.80    1.00
  10   8 -12    1.90    0.80
  10  -8  12    2.00    0.80
  10  -8  12    2.30    1.00
  10  -8  12    2.80    1.00
  10   8 -12    0.80    0.70
 -10  10 -14    7.80    1.40
 -10 -10  14    8.60    1.60
  10 -10  14   10.40    1.70
  10  10 -14   10.30    1.40
  10 -10  14    7.50    1.30
  10 -10  14    8.90    1.50
  10  10 -14   10.40    1.50
 -10  12 -16   -1.40    0.80
 -10 -12  16   -1.30    1.10
  10 -12  16   -0.10    1.10
  10  12 -16   -0.90    0.90
  10  12 -16    1.00    0.80
  10 -12  16   -0.30    1.00
  10 -12  16    0.00    0.90
 -10  14 -18    5.70    1.50
 -10 -14  18    3.20    1.60
  10 -14  18    2.70    1.40
  10 -14  18    3.40    1.40
  10 -14  18    3.60    1.40
  10  14 -18    7.10    1.60
 -10  16 -20    1.50    1.30
 -10 -16  20    2.10    1.70
  10  16 -20    4.80    1.50
  10 -16  20    4.80    1.60
  10 -16  20    2.10    1.50
  10 -16  20    3.80    1.60
 -10  18 -22    2.80    1.40
 -10 -18  22    4.20    1.90
  10  18 -22    1.10    1.50
  10 -18  22    0.20    1.30
  10 -18  22    0.00    1.40
  10 -18  22    3.20    1.70
 -10 -20  24    2.00    1.90
 -10  20 -24    1.20    1.60
  10 -20  24    5.60    1.90
  10 -20  24    1.60    1.80
  10  20 -24    4.10    1.90
 -10 -22  26    4.40    2.30
 -10  22 -26    0.70    1.50
  10 -22  26    2.10    1.70
  10  22 -26    2.60    1.90
  10 -22  26    5.10    2.30
 -11 -25  21    3.30    2.10
 -11  25 -21    1.90    1.80
  11 -25  21   -1.50    1.50
  11 -25  21    1.70    1.60
  11 -25  21    2.10    2.00
  11  25 -21    1.50    1.90
 -11 -23  19    7.30    2.40
 -11  23 -19    1.00    1.40
  11 -23  19    4.10    1.90
  11  23 -19    6.00    2.10
  11 -23  19    3.80    1.90
  11 -23  19    3.20    1.60
 -11 -21  17    1.60    1.80
 -11  21 -17    0.90    1.30
  11 -21  17    1.10    1.40
  11 -21  17    4.00    1.80
  11  21 -17    4.40    1.80
  11 -21  17    0.80    1.60
 -11  19 -15    2.10    1.50
 -11 -19  15    6.90    2.00
  11 -19  15    8.60    2.10
  11 -19  15    8.90    2.00
  11  19 -15    4.30    1.60
  11 -19  15    5.90    1.70
 -11  17 -13   -1.00    1.00
 -11 -17  13    1.60    1.50
  11 -17  13    1.50    1.30
  11  17 -13    0.80    1.30
  11 -17  13    1.50    1.20
  11 -17  13    1.60    1.40
 -11 -15  11   38.00    3.10
 -11  15 -11   33.20    2.80
  11 -15  11   37.10    2.90
  11 -15  11   40.20    3.00
  11  15 -11   41.70    2.90
  11 -15  11   35.10    2.80
 -11 -13   9   44.40    3.10
 -11  13  -9   39.80    2.70
  11  13  -9   42.70    2.80
  11 -13   9   38.70    2.70
  11 -13   9   42.10    2.80
  11 -13   9   37.80    2.80
 -11 -11   7   11.90    1.70
 -11  11  -7   12.00    1.60
  11 -11   7   10.10    1.60
  11 -11   7   14.10    1.70
  11 -11   7   12.70    1.60
  11  11  -7    9.00    1.40
 -11  -9   5   19.60    2.00
 -11   9  -5   21.80    2.00
  11  -9   5   17.50    1.70
  11   9  -5   17.00    1.30
  11   9  -5   15.60    1.70
  11  -9   5   16.40    1.70
  11  -9   5   22.70    2.10
 -11  -7   3    0.00    0.70
 -11   7  -3    0.70    0.50
  11  -7   3    0.10    0.60
  11   7  -3    0.00    0.40
  11   7  -3    0.60    0.70
  11  -7   3    0.20    0.60
  11  -7   3   -0.30    0.70
 -11  -5   1    6.50    1.20
 -11   5  -1    3.80    0.80
  11  -5   1    4.80    0.90
  11  -5   1    4.40    0.80
  11   5  -1    4.90    0.70
  11   5  -1    6.00    1.10
 -11   3   1    0.40    0.60
 -11  -3  -1    0.00    0.70
  11  -3  -1    0.40    0.50
  11   3   1    0.50    0.30
  11  -3  -1   -0.10    0.60
  11   3   1    0.70    0.70
 -11  -1  -3    4.70    0.90
 -11   1   3    2.90    0.90
  11   1   3    6.30    1.10
  11  -1  -3    5.60    1.00
  11  -1  -3    5.30    1.00
  11   1   3    4.50    1.00
  11  -1  -3    4.90    0.80
  11   1   3    5.20    0.60
 -11  -1   5   25.30    1.90
 -11   1  -5   26.80    1.70
  11  -1   5   20.60    1.70
  11  -1   5   28.10    1.90
  11  -1   5   24.00    1.30
  11   1  -5   24.60    1.50
  11   1  -5   26.40    1.70
 -11  -3   7    4.50    1.10
 -11   3  -7    4.50    0.80
  11  -3   7    4.40    0.70
  11  -3   7    5.60    1.10
  11  -3   7    3.80    1.00
  11   3  -7    3.40    0.90
  11   3  -7    4.80    0.80
 -11   5  -9    6.20    0.80
 -11  -5   9    8.50    1.40
  11  -5   9    8.10    1.00
  11   5  -9    8.20    1.10
  11   5  -9    6.90    1.10
  11  -5   9    8.60    1.30
  11  -5   9    5.50    1.20
 -11  -7  11   51.69    3.10
  11  -7  11   47.60    2.80
  11   7 -11   47.20    2.50
  11  -7  11   43.40    2.70
  11   7 -11   47.00    2.50
  11  -7  11   45.40    2.40
 -11  -9  13    2.00    1.20
 -11   9 -13    5.10    1.30
  11  -9  13    4.40    1.10
  11   9 -13    6.80    1.20
  11  -9  13    4.10    1.20
  11   9 -13    4.60    1.10
  11  -9  13    3.70    1.30
 -11 -11  15    5.70    1.60
 -11  11 -15    4.60    1.40
  11 -11  15    4.40    1.40
  11 -11  15    6.00    1.40
  11 -11  15    3.00    1.20
  11  11 -15    5.90    1.30
  11  11 -15    7.90    1.40
 -11 -13  17   12.30    2.10
 -11  13 -17    9.60    1.80
  11  13 -17   12.80    1.80
  11  13 -17   12.10    1.80
  11 -13  17   13.90    2.10
  11 -13  17   11.20    2.00
  11 -13  17   12.50    1.90
 -11  15 -19   11.40    2.00
 -11 -15  19   13.70    2.40
  11 -15  19   10.50    2.00
  11 -15  19   12.40    2.30
  11  15 -19    7.60    1.70
  11  15 -19    8.20    1.60
  11 -15  19    9.30    2.00
 -11  17 -21    2.40    1.50
 -11 -17  21    2.90    1.70
  11 -17  21    1.20    1.40
  11 -17  21   -0.10    1.50
  11  17 -21    1.70    1.50
  11 -17  21    0.80    1.50
 -11 -19  23    4.10    2.00
 -11  19 -23    3.10    1.60
  11 -19  23    2.20    1.60
  11 -19  23    1.90    1.60
  11 -19  23    4.20    1.70
  11  19 -23    3.90    1.80
 -11  21 -25    0.00    1.30
 -11 -21  25   -2.50    1.80
  11  21 -25    0.00    1.70
  11 -21  25   -0.10    1.80
  11 -21  25   -1.00    1.40
 -12 -24  20    4.00    2.20
 -12  24 -20    2.50    1.70
  12 -24  20    4.70    2.00
  12  24 -20    4.20    2.00
  12 -24  20    2.90    1.70
  12 -24  20    2.10    1.90
 -12  22 -18   10.50    2.10
 -12 -22  18    7.00    2.20
  12 -22  18    6.80    2.20
  12 -22  18    5.50    1.80
  12 -22  18    9.10    2.40
  12  22 -18   10.30    2.30
 -12 -20  16    2.60    1.70
 -12  20 -16    0.40    1.30
  12 -20  16    2.10    1.50
  12 -20  16    0.30    1.30
  12 -20  16    1.20    1.60
  12  20 -16   -1.40    1.40
 -12  18 -14    4.60    1.50
 -12 -18  14    7.10    1.90
  12 -18  14    6.20    1.70
  12 -18  14    2.20    1.60
  12  18 -14    9.00    1.90
  12 -18  14    5.50    1.70
 -12  16 -12   -0.20    1.10
 -12 -16  12    3.50    1.70
  12 -16  12    0.70    1.30
  12 -16  12    3.80    1.50
  12  16 -12    3.90    1.50
  12 -16  12    2.10    1.30
 -12  14 -10   39.30    3.00
 -12 -14  10   44.40    3.30
  12  14 -10   43.30    3.00
  12 -14  10   49.40    3.20
  12 -14  10   43.20    3.00
  12 -14  10   43.20    3.10
 -12 -12   8   11.30    1.90
 -12  12  -8   11.30    1.70
  12  12  -8    6.30    1.10
  12 -12   8    9.30    1.60
  12 -12   8    7.70    1.40
  12  12  -8    9.80    1.60
  12 -12   8   10.10    1.60
 -12  10  -6    1.50    0.90
 -12 -10   6    2.40    1.20
  12 -10   6    0.70    0.80
  12  10  -6    1.50    0.70
  12 -10   6    3.20    1.00
  12  10  -6    0.70    0.90
  12 -10   6    2.60    1.10
 -12  -8   4    0.80    0.80
  12   8  -4    1.00    0.60
  12  -8   4    1.10    0.90
  12   8  -4    0.30    0.80
  12  -8   4   -0.70    0.60
  12  -8   4   -0.80    0.50
 -12  -6   2   14.30    1.80
 -12   6  -2   13.50    1.30
  12  -6   2   13.50    1.50
  12   6  -2   11.80    1.00
  12  -6   2   13.60    1.40
  12   6  -2   12.80    1.60
  12  -6   2   12.90    1.60
 -12  -4   0    6.70    1.20
 -12   4   0    6.70    1.00
  12  -4   0    5.30    0.90
  12   4   0    6.30    0.70
  12  -4   0    8.10    1.10
  12   4   0    6.90    1.20
 -12   2   2   35.60    2.10
 -12  -2  -2   29.60    2.00
  12   2   2   33.20    2.20
  12   2   2   30.40    2.00
  12  -2  -2   30.50    1.90
  12  -2  -2   31.80    1.70
  12   2   2   30.60    1.40
 -12   0   4    6.90    1.20
 -12   0  -4    7.00    1.10
  12   0  -4    6.00    1.00
  12   0   4    7.20    0.70
  12   0   4    8.90    1.30
  12   0   4    8.00    1.30
  12   0  -4    7.80    0.90
 -12  -2   6    1.00    0.80
 -12   2  -6    0.00    0.50
  12  -2   6    0.50    0.40
  12   2  -6    0.30    0.50
  12  -2   6   -0.30    0.60
  12  -2   6    0.30    0.80
  12   2  -6   -0.10    0.60
 -12  -4   8    6.00    1.20
 -12   4  -8    5.10    0.80
  12  -4   8    6.50    0.90
  12  -4   8    5.20    1.20
  12  -4   8    9.10    1.30
  12   4  -8    3.90    0.90
  12   4  -8    8.30    1.20
 -12  -6  10   27.20    2.60
  12  -6  10   26.20    1.70
  12   6 -10   23.20    1.70
  12  -6  10   20.70    2.10
  12   6 -10   24.80    1.90
  12  -6  10   27.10    2.50
 -12   8 -12    5.30    1.30
 -12  -8  12    3.90    1.30
  12  -8  12    4.80    1.10
  12   8 -12    6.00    1.20
  12  -8  12    8.80    1.50
  12  -8  12    6.80    1.50
  12   8 -12    5.40    1.10
 -12 -10  14    3.00    1.40
 -12  10 -14    3.90    1.20
  12 -10  14    4.70    1.20
  12  10 -14    1.40    1.10
  12 -10  14    5.30    1.40
  12 -10  14    4.90    1.40
  12  10 -14    4.10    1.10
 -12 -12  16    1.70    1.40
 -12  12 -16    1.90    1.20
  12 -12  16   -0.50    0.90
  12  12 -16   -0.90    0.90
  12 -12  16    2.40    1.30
  12  12 -16   -0.30    1.10
  12 -12  16    0.30    1.10
 -12  14 -18   19.90    2.50
 -12 -14  18   23.20    3.00
  12 -14  18   23.80    2.70
  12  14 -18   19.40    2.30
  12 -14  18   22.90    2.80
  12  14 -18   25.50    2.60
  12 -14  18   24.30    2.70
 -12 -16  20    4.20    1.90
 -12  16 -20    1.30    1.30
  12  16 -20    3.20    1.50
  12 -16  20    5.00    1.60
  12  16 -20    4.90    1.50
  12 -16  20    5.20    1.60
  12 -16  20    4.20    1.80
 -12  18 -22   -0.80    1.20
 -12 -18  22    7.90    2.20
  12  18 -22    0.60    1.50
  12 -18  22    4.00    1.90
  12 -18  22    2.30    1.60
  12  18 -22    3.00    1.40
  12 -18  22    2.60    1.60
 -12  20 -24   -1.70    1.30
 -12 -20  24   -0.40    1.90
  12  20 -24    1.00    1.40
  12 -20  24   -0.90    1.40
  12 -20  24    1.80    1.60
  12  20 -24   -0.60    1.60
  12 -20  24   -0.10    1.60
 -13  23 -19   -0.40    1.30
 -13 -23  19    6.30    2.30
  13  23 -19    6.20    2.30
  13 -23  19    4.50    1.90
  13 -23  19    0.20    1.90
  13 -23  19    3.30    2.00
 -13  21 -17    1.00    1.40
 -13 -21  17    2.30    2.00
  13 -21  17    3.70    1.80
  13 -21  17    0.00    1.40
  13  21 -17   -0.10    1.50
  13 -21  17    3.90    1.90
 -13 -19  15    2.60    1.80
 -13  19 -15    3.10    1.50
  13 -19  15    2.10    1.60
  13 -19  15    3.60    1.70
  13  19 -15    4.30    1.70
  13 -19  15    1.90    1.40
 -13 -17  13    6.40    1.90
 -13  17 -13    1.70    1.40
  13 -17  13    3.60    1.70
  13 -17  13    4.50    1.60
  13 -17  13    4.60    1.50
  13  17 -13    4.00    1.60
 -13 -15  11   17.80    2.50
 -13  15 -11   13.70    2.10
  13  15 -11   13.30    1.80
  13 -15  11   14.30    2.20
  13  15 -11   13.20    2.00
  13 -15  11   13.20    2.00
  13 -15  11   14.40    2.20
 -13  13  -9   34.00    2.70
 -13 -13   9   41.10    3.20
  13 -13   9   39.30    2.90
  13  13  -9   40.60    2.90
  13  13  -9   36.10    2.40
  13 -13   9   37.20    2.90
  13 -13   9   41.40    3.10
 -13 -11   7   19.70    2.40
 -13  11  -7   20.10    2.10
  13 -11   7   20.20    2.10
  13 -11   7   18.90    2.20
  13  11  -7   19.70    1.70
  13 -11   7   19.50    2.10
  13  11  -7   18.40    2.10
 -13  -9   5    8.00    1.60
 -13   9  -5    5.90    1.30
  13  -9   5    4.60    1.10
  13  -9   5    4.80    1.30
  13   9  -5    7.40    1.00
  13   9  -5    5.20    1.30
  13  -9   5    5.50    1.20
 -13  -7   3    2.60    1.10
  13  -7   3    2.60    1.00
  13  -7   3    1.70    0.70
  13   7  -3    2.90    1.00
  13   7  -3    1.30    0.60
  13  -7   3    2.10    0.90
 -13   5  -1   12.20    1.40
 -13  -5   1   12.80    1.70
  13   5  -1   13.20    1.00
  13   5  -1   16.20    1.80
  13  -5   1   14.50    1.40
  13  -5   1   13.10    1.50
 -13   3   1   17.30    1.70
 -13  -3  -1   17.20    1.80
  13  -3  -1   17.50    1.70
  13  -3  -1   14.30    1.20
  13   3   1   20.90    2.00
  13   3   1   17.10    1.80
 -13  -1  -3    3.90    1.00
 -13   1   3    4.50    1.00
  13   1   3    2.60    0.80
  13  -1  -3    4.50    0.80
  13  -1  -3    4.20    1.00
  13  -1  -3    4.50    1.00
  13   1   3    3.80    1.10
 -13  -1   5    5.60    1.20
 -13   1  -5    4.30    0.90
  13   1  -5    5.70    0.90
  13  -1   5    5.60    1.20
  13  -1   5    5.10    1.10
  13   1  -5    3.80    1.00
  13  -1   5    3.30    1.00
 -13   3  -7   13.80    1.40
 -13  -3   7   14.40    1.90
  13  -3   7   16.90    1.90
  13  -3   7   17.40    1.20
  13   3  -7   17.80    1.70
  13   3  -7   16.40    1.50
  13  -3   7   17.00    1.80
 -13  -5   9   16.00    2.00
  13   5  -9   18.60    1.50
  13  -5   9   16.70    1.90
  13  -5   9   17.80    1.40
  13  -5   9   17.70    2.10
  13   5  -9   21.00    1.90
 -13  -7  11    3.20    1.20
  13  -7  11    0.50    0.70
  13   7 -11    2.10    1.00
  13   7 -11    1.30    0.80
  13  -7  11    1.80    1.00
  13  -7  11    2.80    1.10
 -13  -9  13   16.80    2.30
 -13   9 -13   12.50    1.90
  13   9 -13   17.40    2.00
  13  -9  13   16.00    2.10
  13  -9  13   15.80    2.00
  13  -9  13   17.30    1.90
  13   9 -13   13.80    1.70
 -13 -11  15    0.30    1.40
 -13  11 -15    5.10    1.50
  13 -11  15    4.00    1.20
  13 -11  15    3.50    1.40
  13  11 -15    2.70    1.10
  13 -11  15    2.50    1.30
  13  11 -15    5.40    1.40
 -13  13 -17    0.10    1.10
 -13 -13  17    2.20    1.70
  13 -13  17    0.90    1.10
  13  13 -17    0.50    1.20
  13 -13  17    1.80    1.40
  13 -13  17    1.50    1.40
  13  13 -17   -0.20    0.90
 -13 -15  19    2.70    1.70
 -13  15 -19    4.20    1.60
  13 -15  19   -0.20    1.20
  13 -15  19    4.30    1.70
  13  15 -19    4.20    1.40
  13 -15  19    4.80    1.60
  13  15 -19    2.80    1.50
 -13 -17  21    8.30    2.40
 -13  17 -21    4.80    1.70
  13 -17  21    8.90    2.00
  13  17 -21    6.30    1.60
  13 -17  21    3.40    1.70
  13 -17  21    3.20    1.70
  13  17 -21    9.70    2.10
 -13 -19  23    4.30    2.10
 -13  19 -23    2.30    1.60
  13  19 -23    2.60    1.70
  13 -19  23    2.80    2.00
  13 -19  23    5.00    1.90
  13  19 -23    3.60    1.60
  13 -19  23    4.10    1.80
 -13 -21  25   -1.00    1.90
 -13  21 -25   -1.30    1.30
  13 -21  25   -1.10    1.30
  13  21 -25    2.40    1.60
  13  21 -25   -0.50    1.90
 -14 -22  18    2.40    2.00
 -14  22 -18   -0.30    1.40
  14 -22  18    1.70    1.70
  14  22 -18   -1.00    1.60
  14 -22  18   -0.70    1.40
  14 -22  18    1.10    1.60
 -14  20 -16    0.20    1.30
 -14 -20  16   -0.90    1.50
  14 -20  16   -1.40    1.40
  14  20 -16    1.70    1.60
  14 -20  16   -0.10    1.40
  14 -20  16   -0.20    1.60
 -14 -18  14    6.30    2.00
 -14  18 -14    2.70    1.50
  14 -18  14    4.10    1.80
  14 -18  14    2.10    1.50
  14 -18  14    2.50    1.50
  14  18 -14    6.70    1.90
 -14 -16  12   -0.10    1.50
 -14  16 -12    0.60    1.10
  14 -16  12    0.60    1.30
  14 -16  12    0.50    1.20
  14  16 -12    0.40    1.40
  14 -16  12    1.30    1.30
 -14  14 -10    2.10    1.30
 -14 -14  10    2.00    1.50
  14 -14  10    0.60    1.10
  14  14 -10    4.40    1.50
  14 -14  10    0.30    1.30
  14 -14  10    1.00    1.20
 -14 -12   8    4.70    1.60
 -14  12  -8    8.30    1.60
  14 -12   8    7.00    1.50
  14  12  -8    4.80    1.50
  14 -12   8    3.10    1.20
  14 -12   8    5.70    1.60
 -14 -10   6   20.00    2.50
 -14  10  -6   22.70    2.40
  14  10  -6   25.90    2.50
  14 -10   6   23.90    2.00
  14 -10   6   21.80    2.30
  14 -10   6   23.40    2.50
 -14  -8   4    1.80    1.20
  14  -8   4    1.90    1.10
  14   8  -4    3.10    1.10
  14  -8   4    2.20    0.90
  14  -8   4    2.30    1.00
 -14   6  -2    1.90    0.70
 -14  -6   2    0.90    1.00
  14  -6   2    1.20    0.70
  14  -6   2    2.00    1.00
  14   6  -2    0.00    0.90
  14  -6   2    0.70    0.80
 -14  -4   0   -0.70    0.70
 -14   4   0   -0.10    0.60
  14  -4   0    0.10    0.60
  14   4   0    0.80    0.80
  14  -4   0   -0.20    0.50
 -14   2   2    1.40    0.80
 -14  -2  -2    1.50    0.90
  14  -2  -2    1.50    0.60
  14  -2  -2    2.50    0.90
  14   2   2    2.70    1.00
  14   2   2   -0.20    0.70
 -14   0  -4   -0.60    0.60
 -14   0   4   -1.10    0.70
  14   0  -4    0.00    0.60
  14   0  -4    0.70    0.70
  14   0  -4   -0.20    0.50
  14   0   4    0.10    0.80
 -14  -2   6   31.30    2.40
 -14   2  -6   31.30    2.10
  14  -2   6   32.20    2.30
  14   2  -6   31.10    2.10
  14   2  -6   30.60    1.80
  14  -2   6   33.40    2.30
 -14   4  -8   10.70    1.30
 -14  -4   8   11.30    1.80
  14  -4   8    9.30    1.60
  14   4  -8   11.70    1.30
  14  -4   8   10.50    1.60
  14   4  -8   14.20    1.70
 -14  -6  10    0.70    1.10
  14   6 -10    1.00    0.90
  14   6 -10   -0.20    0.70
  14  -6  10    0.60    1.00
  14  -6  10    0.20    0.90
 -14  -8  12    3.90    1.50
  14   8 -12    3.10    1.00
  14   8 -12    5.20    1.20
  14  -8  12    3.90    1.20
  14  -8  12    3.50    1.30
 -14  10 -14    5.30    1.50
 -14 -10  14    1.60    1.50
  14  10 -14    5.10    1.40
  14 -10  14    2.90    1.40
  14 -10  14    7.30    1.70
  14  10 -14    2.80    1.10
 -14  12 -16    0.10    1.10
 -14 -12  16    1.30    1.50
  14  12 -16    0.70    1.00
  14  12 -16   -0.30    1.10
  14 -12  16    0.10    1.10
  14 -12  16   -0.30    1.10
 -14 -14  18    1.20    1.60
 -14  14 -18    0.30    1.20
  14  14 -18    1.00    1.00
  14 -14  18    2.40    1.50
  14 -14  18    0.00    1.40
  14  14 -18    0.00    1.30
 -14 -16  20    1.30    1.80
 -14  16 -20   -1.10    1.20
  14  16 -20   -0.50    1.20
  14 -16  20    2.40    1.50
  14  16 -20    1.00    1.40
  14 -16  20    0.20    1.50
 -14 -18  22    4.80    2.10
 -14  18 -22    4.60    1.80
  14 -18  22    6.90    2.20
  14  18 -22    1.90    1.70
  14 -18  22    3.20    1.80
  14  18 -22    5.30    1.60
 -14 -20  24   -0.60    2.10
 -14  20 -24    1.10    1.50
  14  20 -24    0.20    1.30
  14  20 -24    1.50    1.80
  14 -20  24    2.70    1.70
 -15  21 -17   -1.20    1.20
 -15 -21  17    1.70    2.20
  15  21 -17    1.90    1.90
  15 -21  17   -0.20    1.60
  15 -21  17   -0.90    1.40
  15 -21  17    0.90    1.80
 -15 -19  15   -1.40    1.60
 -15  19 -15    0.40    1.40
  15 -19  15    0.20    1.50
  15 -19  15    0.60    1.30
  15  19 -15   -0.40    1.60
  15 -19  15    2.20    1.70
 -15 -17  13    5.60    1.90
 -15  17 -13    6.50    1.70
  15 -17  13    8.90    1.90
  15 -17  13    4.80    1.70
  15 -17  13    8.90    2.20
  15  17 -13    5.70    1.80
 -15 -15  11   12.10    2.40
 -15  15 -11   11.80    2.10
  15  15 -11    7.90    1.90
  15 -15  11    7.40    1.80
  15 -15  11    8.30    1.90
  15 -15  11   10.30    2.10
 -15  13  -9   11.50    1.90
 -15 -13   9   15.60    2.50
  15 -13   9   10.40    1.80
  15 -13   9   15.10    2.10
  15 -13   9    9.40    1.90
  15  13  -9   12.10    2.00
 -15 -11   7    3.10    1.60
 -15  11  -7    2.10    1.20
  15 -11   7    3.90    1.30
  15 -11   7    2.50    1.40
  15  11  -7    2.30    1.30
  15 -11   7    2.60    1.20
 -15   9  -5   14.90    1.90
 -15  -9   5   12.50    2.10
  15  -9   5   15.40    1.90
  15  -9   5   17.00    1.90
  15   9  -5   15.20    2.00
  15  -9   5   15.00    2.10
 -15  -7   3   -1.40    1.00
  15  -7   3   -0.60    0.90
  15  -7   3    0.20    0.70
  15  -7   3    1.70    1.00
  15   7  -3   -0.90    0.90
 -15  -5   1   65.89    3.80
 -15   5  -1   68.99    3.40
  15  -5   1   69.79    3.20
  15  -5   1   74.99    3.60
  15   5  -1   78.69    3.80
 -15  -3  -1   66.99    3.50
 -15   3   1   58.99    3.20
  15  -3  -1   66.39    3.30
  15   3   1   59.69    3.30
  15  -3  -1   61.09    2.80
  15   3   1   60.69    3.50
 -15  -1  -3    0.60    0.80
 -15   1   3    1.20    0.90
  15  -1  -3    0.60    0.80
  15  -1  -3    1.00    0.60
  15   1   3    2.00    1.00
  15  -1  -3    1.40    0.90
  15   1   3   -1.00    0.70
 -15  -1   5   24.40    2.30
 -15   1  -5   23.70    2.10
  15   1  -5   21.10    1.50
  15   1  -5   24.20    2.00
  15  -1   5   20.90    2.10
  15   1  -5   23.40    2.10
  15  -1   5   24.10    2.30
 -15   3  -7   -0.40    0.60
 -15  -3   7    1.60    1.00
  15   3  -7    0.30    0.60
  15  -3   7    0.80    0.90
  15   3  -7    1.40    0.80
  15  -3   7    0.50    0.90
 -15  -5   9   22.90    2.60
  15   5  -9   21.20    1.80
  15   5  -9   25.90    2.20
  15  -5   9   21.00    2.30
  15  -5   9   26.30    2.70
 -15  -7  11    0.90    1.30
  15   7 -11    2.00    1.10
  15   7 -11    0.80    0.80
  15  -7  11    3.50    1.40
  15  -7  11    2.60    1.20
 -15  -9  13   18.60    2.70
 -15   9 -13   20.20    2.40
  15   9 -13   18.20    2.00
  15  -9  13   13.60    2.20
  15   9 -13   17.10    1.90
  15  -9  13   16.50    2.20
 -15  11 -15    1.00    1.10
 -15 -11  15    0.90    1.50
  15 -11  15    0.00    1.20
  15  11 -15    1.90    1.30
  15  11 -15   -0.90    0.80
  15 -11  15    0.70    1.30
 -15  13 -17    5.20    1.60
 -15 -13  17    7.40    2.20
  15 -13  17    4.10    1.70
  15 -13  17    6.30    1.80
  15  13 -17    8.30    1.80
  15  13 -17    5.90    1.50
 -15  15 -19    1.10    1.40
 -15 -15  19    2.20    1.90
  15 -15  19    1.50    1.50
  15  15 -19    3.70    1.60
  15 -15  19    0.90    1.40
  15  15 -19    1.50    1.20
 -15 -17  21    0.50    1.70
 -15  17 -21    1.90    1.40
  15 -17  21   -1.00    1.50
  15  17 -21    0.90    1.60
  15 -17  21   -1.90    1.30
  15  17 -21    1.60    1.30
 -15  19 -23    1.90    1.70
 -15 -19  23    1.00    2.10
  15 -19  23    0.70    1.50
  15 -19  23    3.10    3.40
  15  19 -23    0.10    1.60
  15  19 -23    3.70    1.90
 -16  20 -16    1.10    1.50
 -16 -20  16    4.00    2.10
  16 -20  16    0.90    1.60
  16  20 -16    2.00    1.90
  16 -20  16    0.40    1.70
 -16  18 -14    0.60    1.40
 -16 -18  14    7.80    2.30
  16 -18  14    4.40    1.70
  16  18 -14    1.20    1.60
  16 -18  14    3.30    1.90
 -16  16 -12    1.50    1.50
 -16 -16  12    5.70    2.10
  16  16 -12    4.20    1.70
  16 -16  12    4.30    1.90
  16 -16  12    7.40    1.80
 -16  14 -10   -1.10    1.00
 -16 -14  10   -1.20    1.40
  16 -14  10    0.40    1.20
  16 -14  10   -1.20    1.20
  16  14 -10    1.80    1.40
 -16 -12   8    4.10    1.80
 -16  12  -8    5.30    1.40
  16 -12   8    2.50    1.30
  16  12  -8    1.30    1.40
  16 -12   8    4.70    1.50
 -16 -10   6    9.90    2.00
 -16  10  -6   12.20    1.90
  16 -10   6    7.60    1.60
  16  10  -6   13.40    2.10
  16 -10   6    9.20    1.90
 -16  -8   4   16.30    2.40
  16  -8   4   15.60    2.20
  16  -8   4   13.60    2.00
  16   8  -4   16.40    2.20
 -16  -6   2   -1.20    1.00
  16  -6   2    0.40    0.90
  16   6  -2    0.50    1.10
  16  -6   2   -1.00    1.00
 -16  -4   0    7.30    1.60
 -16   4   0    8.10    1.40
  16  -4   0    9.00    1.50
  16   4   0   12.10    1.90
  16   4   0    9.10    1.60
 -16   2   2    1.50    1.00
 -16  -2  -2    1.30    1.00
  16   2   2    2.30    1.30
  16   2   2    1.60    1.10
  16  -2  -2    1.60    1.00
 -16   0   4   38.00    2.80
 -16   0  -4   40.40    2.60
  16   0  -4   40.20    2.70
  16   0  -4   42.80    2.70
  16   0   4   44.00    2.90
 -16   2  -6   45.60    2.70
 -16  -2   6   49.00    3.30
  16  -2   6   49.60    3.20
  16   2  -6   47.00    2.90
  16  -2   6   47.10    3.00
 -16  -4   8   -0.20    1.00
  16   4  -8    2.00    1.00
  16  -4   8   -0.40    0.90
  16  -4   8   -0.40    0.90
 -16  -6  10   33.50    3.40
  16  -6  10   29.80    2.90
  16   6 -10   33.50    2.60
  16  -6  10   28.10    2.80
 -16  -8  12    1.20    1.50
  16   8 -12    5.00    1.40
  16  -8  12    1.80    1.30
  16  -8  12    2.50    1.30
 -16 -10  14    2.60    1.70
 -16  10 -14    2.80    1.40
  16 -10  14    3.30    1.50
  16  10 -14    5.50    1.50
  16 -10  14    2.60    1.40
 -16  12 -16    0.90    1.30
 -16 -12  16    1.10    1.60
  16 -12  16    1.20    1.30
  16  12 -16   -0.50    1.20
  16 -12  16    2.60    1.60
 -16  14 -18   16.00    2.50
 -16 -14  18   14.10    2.70
  16 -14  18   12.30    2.30
  16  14 -18   13.40    2.20
  16 -14  18   14.00    2.60
 -16  16 -20    5.70    1.90
 -16 -16  20    7.80    2.50
  16 -16  20    5.10    1.90
  16 -16  20    4.50    1.90
  16  16 -20    6.50    2.00
 -16  18 -22   -1.50    1.30
 -16 -18  22    4.90    2.20
  16 -18  22    0.10    1.90
  16 -18  22   -1.10    1.40
  16  18 -22   -1.10    1.90
 -17  19 -15   -0.50    1.30
 -17 -19  15   -3.40    1.70
  17 -19  15   -0.90    1.40
  17  19 -15   -1.20    1.60
  17 -19  15    0.00    1.60
 -17  17 -13    1.60    1.50
 -17 -17  13    1.50    1.80
  17 -17  13    2.90    1.80
  17  17 -13    1.60    1.60
  17 -17  13    2.60    1.50
 -17  15 -11    2.40    1.50
 -17 -15  11   -1.10    1.50
  17 -15  11    4.50    1.90
  17  15 -11    3.70    1.80
  17 -15  11    3.40    1.60
 -17  13  -9    5.80    1.70
 -17 -13   9    4.60    2.00
  17 -13   9    3.90    1.70
  17 -13   9    2.70    1.40
  17  13  -9    4.40    1.80
 -17 -11   7    9.20    2.20
 -17  11  -7    6.60    1.60
  17  11  -7   10.90    2.10
  17 -11   7    5.90    1.70
  17 -11   7    6.20    1.60
 -17  -9   5   -0.10    1.40
  17  -9   5   -0.30    1.20
  17   9  -5    0.60    1.20
  17  -9   5   -0.80    1.00
 -17  -7   3   -0.30    1.30
  17  -7   3   -0.10    1.10
  17  -7   3    0.80    1.10
  17   7  -3    1.50    1.20
 -17  -5   1   34.90    3.00
  17  -5   1   33.90    2.60
  17   5  -1   39.00    2.90
  17  -5   1   30.30    2.90
  17   5  -1   37.10    2.70
 -17   3   1   15.10    1.90
 -17  -3  -1   14.60    2.10
  17   3   1   14.10    2.00
  17   3   1   18.90    2.30
  17  -3  -1   13.80    1.90
 -17   1   3   -0.30    0.90
 -17  -1  -3    0.00    1.00
  17  -1  -3    1.30    1.00
  17   1   3    2.50    1.10
  17   1   3    0.20    1.10
 -17  -1   5   -0.80    1.10
 -17   1  -5    1.00    0.90
  17   1  -5    0.50    1.00
  17  -1   5   -0.60    1.00
  17   1  -5   -2.10    0.80
  17  -1   5    0.60    1.00
 -17  -3   7   -0.10    1.20
  17   3  -7    1.60    1.10
  17  -3   7    2.10    1.20
  17  -3   7    0.30    1.00
 -17  -5   9    0.90    1.40
  17  -5   9    0.50    1.20
  17  -5   9    2.00    1.20
  17   5  -9   -0.30    1.00
 -17  -7  11   -0.10    1.40
  17  -7  11    0.00    1.10
  17   7 -11   -0.10    1.10
  17  -7  11    0.60    1.10
 -17  -9  13    2.50    1.80
 -17   9 -13    2.90    1.40
  17  -9  13    4.40    1.60
  17  -9  13    1.90    1.40
  17   9 -13    4.60    1.40
 -17  11 -15   -0.90    1.10
 -17 -11  15   -1.70    1.60
  17 -11  15    0.20    1.40
  17 -11  15   -0.70    1.20
  17  11 -15    0.10    1.30
 -17  13 -17    3.40    1.60
 -17 -13  17    2.30    2.10
  17 -13  17    7.50    2.20
  17 -13  17    2.40    1.60
  17  13 -17    5.90    1.70
 -17 -15  19   11.00    2.70
 -17  15 -19   13.70    2.50
  17 -15  19    9.50    2.20
  17  15 -19    8.80    2.50
  17 -15  19   15.40    2.90
 -17 -17  21    5.90    2.30
 -17  17 -21    1.00    1.40
  17 -17  21    0.40    1.70
  17 -17  21    2.60    1.80
 -18  18 -14    0.10    1.30
 -18 -18  14    0.60    2.00
  18 -18  14    0.60    1.60
  18 -18  14   -1.30    1.50
  18  18 -14   -1.10    1.50
 -18  16 -12    0.50    1.30
 -18 -16  12    2.70    1.90
  18 -16  12   -0.30    1.30
  18 -16  12    0.50    1.60
  18  16 -12    1.50    1.70
 -18 -14  10    3.10    1.90
 -18  14 -10    2.30    1.40
  18 -14  10    3.20    1.80
  18  14 -10    4.40    1.80
  18 -14  10    2.20    1.40
 -18 -12   8    4.30    2.00
 -18  12  -8    3.70    1.40
  18  12  -8    2.40    1.50
  18 -12   8    3.50    1.50
  18 -12   8    3.00    1.70
 -18  10  -6    5.60    1.60
 -18 -10   6    8.20    2.20
  18 -10   6    4.70    1.50
  18 -10   6    5.60    1.80
  18  10  -6    5.20    1.80
 -18  -8   4   -1.00    1.30
  18   8  -4    1.30    1.30
  18  -8   4    2.00    1.20
  18  -8   4   -0.20    1.20
 -18  -6   2    5.90    1.80
  18  -6   2    6.10    1.70
  18   6  -2    4.00    1.40
  18   6  -2    3.40    1.50
  18  -6   2    2.40    1.20
 -18  -4   0    0.50    1.20
  18   4   0   -1.40    1.10
  18  -4   0   -1.20    0.90
  18   4   0    0.30    1.00
 -18   2   2   14.00    2.00
 -18  -2  -2   21.80    2.50
  18   2   2   18.00    2.30
  18   2   2   17.00    2.30
  18  -2  -2   19.30    2.20
 -18   0  -4   -0.10    1.00
 -18   0   4    0.70    1.10
  18   0  -4   -0.70    0.90
  18   0  -4    0.70    1.00
  18   0   4    0.20    1.00
 -18  -2   6   10.10    1.90
  18   2  -6    8.80    1.70
  18  -2   6    7.80    1.70
  18  -2   6    9.10    1.80
  18   2  -6    8.50    1.70
 -18  -4   8   18.90    2.60
  18   4  -8   16.00    2.10
  18  -4   8   10.70    1.90
  18  -4   8   13.90    2.20
 -18  -6  10    6.90    2.00
  18  -6  10    5.00    1.60
  18  -6  10    5.40    1.60
  18   6 -10    5.10    1.50
 -18  -8  12    1.60    1.60
  18  -8  12    0.00    1.20
  18  -8  12   -0.40    1.10
  18   8 -12   -0.80    1.20
 -18  10 -14    1.90    1.50
 -18 -10  14    0.40    1.90
  18 -10  14   -0.10    1.20
  18 -10  14    0.70    1.30
  18  10 -14   -1.40    1.20
 -18  12 -16    8.10    2.00
 -18 -12  16    6.60    2.50
  18 -12  16    8.80    2.20
  18  12 -16   11.00    3.10
  18 -12  16   10.50    2.20
 -18 -14  18   -0.30    1.80
 -18  14 -18    1.40    1.40
  18 -14  18    2.20    1.60
  18 -14  18    1.50    1.60
 -18  16 -20    3.20    1.80
 -18 -16  20    1.10    2.20
  18 -16  20   -1.10    1.40
  18 -16  20    4.40    2.40
 -19 -17  13    4.10    2.30
 -19  17 -13    6.60    2.00
  19  17 -13    9.20    2.40
  19 -17  13    6.90    2.20
  19 -17  13    8.80    2.10
 -19 -15  11    0.80    1.90
 -19  15 -11    1.30    1.50
  19  15 -11    0.40    1.70
  19 -15  11    1.00    1.40
  19 -15  11    1.50    1.70
 -19  13  -9    1.10    1.40
 -19 -13   9    1.50    1.80
  19  13  -9   -0.90    1.40
  19 -13   9   -1.40    1.30
  19 -13   9    1.30    1.40
 -19  11  -7   -1.70    1.00
 -19 -11   7   -2.00    1.60
  19 -11   7    0.40    1.20
  19  11  -7    1.20    1.50
  19 -11   7   -0.70    1.30
 -19  -9   5    1.90    1.80
  19   9  -5    4.90    1.70
  19  -9   5    2.50    1.50
  19  -9   5    5.70    1.60
 -19  -7   3    1.20    1.50
  19  -7   3   -0.50    1.20
  19   7  -3    0.30    1.30
  19  -7   3    0.50    1.10
 -19  -5   1    3.10    1.50
  19   5  -1    0.70    1.30
  19  -5   1    1.30    1.20
  19  -5   1    1.50    1.30
  19   5  -1    0.80    1.10
 -19  -3  -1    9.70    2.00
  19  -3  -1    7.80    1.60
  19   3   1    7.50    1.70
  19   3   1   11.70    2.20
 -19   1   3    0.10    1.10
 -19  -1  -3    0.50    1.10
  19   1   3   -0.70    1.10
  19  -1  -3   -2.10    0.90
 -19  -1   5    5.50    1.70
  19  -1   5    4.90    1.60
  19   1  -5    6.40    1.60
  19   1  -5    7.70    1.70
  19  -1   5    5.10    1.40
 -19  -3   7    0.30    1.40
  19   3  -7   -0.10    1.00
  19  -3   7   -0.60    1.10
  19   3  -7    0.70    1.10
  19  -3   7    1.60    1.30
 -19  -5   9    0.10    1.50
  19  -5   9    0.20    1.20
  19   5  -9    0.40    1.20
  19  -5   9    0.80    1.20
 -19  -7  11   -2.30    1.50
  19  -7  11    0.90    1.30
  19   7 -11    0.10    1.20
  19  -7  11    0.70    1.20
 -19   9 -13   14.30    2.30
 -19  -9  13   12.70    2.70
  19  -9  13   11.40    2.10
  19  -9  13   12.70    2.20
 -19 -11  15    3.90    2.20
 -19  11 -15    6.00    1.90
  19 -11  15    5.70    1.80
  19 -11  15    5.40    1.80
 -19 -13  17   11.80    2.80
 -19  13 -17    9.40    2.20
  19 -13  17    9.00    2.20
  19 -13  17   14.40    2.60
 -19 -15  19   10.00    2.60
 -19  15 -19    0.10    1.60
  19 -15  19    1.70    1.70
 -20 -16  12    5.20    2.50
 -20  16 -12    3.40    1.70
  20 -16  12    6.20    2.10
  20  16 -12    6.70    2.20
  20 -16  12    9.10    2.50
 -20 -14  10    4.40    2.30
 -20  14 -10    9.20    2.10
  20 -14  10    6.60    1.90
  20 -14  10    6.60    2.20
  20  14 -10    6.30    2.20
 -20 -12   8    6.60    2.30
 -20  12  -8    6.60    1.80
  20 -12   8    4.20    2.00
  20 -12   8    3.30    1.60
  20  12  -8    7.00    2.00
 -20  10  -6    6.60    1.70
 -20 -10   6    5.60    2.30
  20  10  -6    3.80    1.80
  20 -10   6    6.50    2.10
  20 -10   6    4.10    1.50
 -20  -8   4    0.10    1.60
  20  -8   4    1.80    1.50
  20  -8   4    1.90    1.40
  20   8  -4    3.40    1.60
 -20  -6   2   18.80    2.80
  20  -6   2   23.30    2.60
  20   6  -2   19.90    2.50
  20  -6   2   16.30    2.40
  20   6  -2   24.10    2.90
 -20  -4   0    9.80    2.10
  20   4   0    5.80    1.70
  20   4   0    9.50    2.20
  20  -4   0    7.40    1.70
 -20  -2  -2   21.80    2.60
  20   2   2   17.30    2.40
  20  -2  -2   20.00    2.50
 -20   0   4    5.30    1.70
  20   0   4   10.10    2.10
  20   0   4    6.20    1.70
  20   0  -4    8.60    1.70
 -20  -2   6    3.80    1.70
  20   2  -6    2.90    1.40
  20  -2   6    4.80    1.60
  20   2  -6    3.40    1.40
  20  -2   6    6.20    1.80
 -20  -4   8    2.60    1.90
  20   4  -8   -1.10    1.50
  20  -4   8   -0.60    1.20
  20  -4   8   -1.10    1.10
  20   4  -8    0.40    1.20
 -20  -6  10    0.40    1.70
  20  -6  10    2.40    1.60
  20  -6  10    3.30    1.60
 -20  -8  12    8.00    2.40
  20  -8  12    9.80    2.10
  20  -8  12   10.70    2.10
 -20 -10  14    2.40    2.10
 -20  10 -14   -1.90    1.20
  20 -10  14    3.20    1.80
  20 -10  14   -0.70    1.30
 -20 -12  16    6.60    2.50
 -20  12 -16    5.40    1.80
  20 -12  16    3.10    1.80
  20 -12  16    2.10    1.60
 -20  14 -18   13.70    2.50
 -20 -14  18   14.00    3.20
  20 -14  18    7.40    2.10
 -21  15 -11    7.50    2.00
 -21 -15  11    8.60    2.80
  21  15 -11   11.20    2.60
 -21  13  -9    2.20    1.60
 -21 -13   9    1.30    2.10
  21 -13   9    0.10    1.30
  21  13  -9    3.50    1.90
  21 -13   9    2.60    1.80
 -21 -11   7   -1.60    1.70
 -21  11  -7   -1.20    1.30
  21  11  -7   -1.30    1.70
  21 -11   7   -0.40    1.40
  21 -11   7    0.40    1.30
 -21  -9   5   11.60    2.60
  21  -9   5    6.90    1.80
  21   9  -5   12.10    2.40
  21  -9   5    5.20    1.90
 -21  -7   3    7.70    2.20
  21  -7   3    3.40    1.50
  21   7  -3    5.30    1.90
  21   7  -3    4.20    1.50
  21  -7   3    5.30    1.70
 -21  -5   1    1.80    1.70
  21  -5   1    1.50    1.40
  21   5  -1    1.40    1.60
  21  -5   1    3.70    1.60
  21   5  -1    2.80    1.50
 -21  -3  -1    1.10    1.50
  21   3   1    1.00    1.40
  21   3   1    4.00    1.80
  21  -3  -1    3.90    1.60
 -21   1   3   23.00    4.40
  21   1   3   11.60    2.10
  21  -1  -3   17.70    2.40
 -21  -1   5   14.20    2.50
  21   1  -5   17.00    2.40
  21  -1   5   12.60    2.30
  21  -1   5   13.30    2.30
 -21  -3   7   -1.70    1.60
  21   3  -7    1.20    1.20
  21  -3   7    0.30    1.40
  21  -3   7   -0.20    1.20
 -21  -5   9   -0.60    1.70
  21   5  -9   -0.40    1.20
  21  -5   9   -1.40    1.20
  21  -5   9    0.40    1.30
 -21  -7  11    7.50    2.50
  21  -7  11    6.00    1.80
  21  -7  11    4.70    1.70
 -21  -9  13   -0.40    1.90
 -21   9 -13    1.60    1.40
  21  -9  13    0.30    1.30
  21  -9  13    0.30    1.40
 -21 -11  15    1.10    2.00
 -21  11 -15    2.00    1.60
  21 -11  15   -1.80    1.20
  21 -11  15   -1.00    1.50
  21 -13  17   -2.10    1.30
 -22  12  -8    2.10    1.60
 -22 -12   8    2.40    2.10
  22  12  -8    4.70    2.30
  22 -12   8    0.40    1.70
  22 -12   8    1.10    1.60
 -22 -10   6   -0.70    1.90
 -22  10  -6   -1.70    1.20
  22 -10   6    1.40    1.40
  22  10  -6    0.70    1.70
  22 -10   6    0.20    1.50
 -22  -8   4    0.10    1.80
  22  -8   4   -0.20    1.40
  22   8  -4   -0.70    1.60
  22   8  -4    0.30    1.30
  22  -8   4    0.80    1.30
 -22  -6   2    0.00    1.70
  22   6  -2   -0.50    1.60
  22  -6   2    1.50    1.50
  22   6  -2   -0.50    1.10
  22  -6   2    0.80    1.30
 -22  -4   0   -0.40    1.50
  22  -4   0    1.10    1.30
  22  -4   0   -0.60    1.10
  22   4   0   -2.40    1.00
  22   4   0    2.00    1.80
 -22  -2  -2    4.80    2.80
  22   2   2    3.50    1.60
  22  -2  -2    2.60    1.40
 -22   0   4   -0.20    1.70
  22   0   4    0.80    1.30
  22   0  -4   -0.30    1.20
  22   0   4   -1.50    1.20
 -22  -2   6    0.90    1.70
  22   2  -6   -0.70    1.10
  22  -2   6    1.20    1.50
  22  -2   6    1.60    1.40
 -22  -4   8    2.30    2.00
  22   4  -8    3.60    1.60
  22  -4   8    0.20    1.40
  22  -4   8    2.20    1.50
 -22  -6  10    1.10    2.00
  22   6 -10    0.20    1.20
  22  -6  10    0.50    1.30
  22  -6  10   -0.40    1.30
 -22  -8  12    4.10    2.40
  22  -8  12    1.10    1.60
  22  -8  12   -0.50    1.30
 -22 -10  14   -1.00    2.20
 -22  10 -14   -0.70    1.40
  22 -10  14    1.20    1.50
 -23 -11   7    0.40    2.10
  23  11  -7    3.10    2.10
 -23  -9   5    2.40    2.20
  23  -9   5   -0.50    1.50
  23  -9   5    1.40    1.50
  23   9  -5   -0.10    1.30
  23   9  -5   -1.90    1.80
 -23  -7   3    1.40    1.90
  23  -7   3    0.90    1.40
  23   7  -3   -1.90    1.10
  23  -7   3   -1.80    1.20
  23   7  -3   -2.40    1.50
 -23  -5   1   -0.10    1.50
  23   5  -1    3.00    1.80
  23  -5   1    2.30    1.40
  23   5  -1    1.10    1.30
  23  -5   1    1.90    1.70
 -23  -3  -1    2.70    2.30
  23  -3  -1    5.40    1.80
  23   3   1    4.00    1.70
  23  -3  -1    2.60    1.50
  23   1   3    2.40    1.50
  23   1   3    2.10    1.70
  23  -1  -3    1.10    1.40
 -23  -1   5    0.40    1.80
  23  -1   5   -0.50    1.20
  23  -1   5   -0.80    1.30
  23   1  -5    1.20    1.30
 -23  -3   7    6.30    2.30
  23   3  -7    3.10    1.40
  23  -3   7    3.00    1.70
  23  -3   7    4.70    1.80
 -23  -5   9    0.50    1.90
  23  -5   9   -0.50    1.40
  23  -5   9    1.40    1.50
  23   5  -9   -0.20    1.20
 -23  -7  11    1.90    2.20
  23  -7  11    1.50    1.60
  23   7 -11    1.30    1.30
  23  -7  11   -1.50    1.30
  23  -9  13   -0.60    1.30
 -24  -8   4    5.70    2.40
  24   8  -4    6.50    2.40
  24   8  -4    2.60    1.60
 -24  -6   2   -1.20    2.00
  24   6  -2    3.20    1.60
  24  -6   2    5.90    1.90
  24   6  -2    2.90    2.10
 -24  -4   0    1.80    2.40
  24  -4   0   -1.80    1.30
  24  -4   0    2.20    1.60
  24   4   0   -1.10    1.40
  24   2   2    6.50    1.90
  24  -2  -2    6.50    1.90
  24   2   2    7.70    2.20
  24   0  -4    4.60    1.90
  24   0   4    3.30    1.70
  24   0   4    7.70    2.30
 -24  -2   6    1.00    1.90
  24  -2   6   -0.50    1.40
  24   2  -6    0.70    1.50
  24  -2   6    0.00    1.40
 -24  -4   8    2.90    2.10
  24  -4   8   -0.20    1.50
  24  -4   8    1.50    1.90
  24   4  -8    0.30    1.40
 -24  -6  10    0.20    2.00
  24   6 -10   -0.70    1.30
  24  -6  10    1.20    1.60
  25   1   3    0.40    1.40
  25  -1  -3   -1.10    1.30
   0  28 -22   -3.20    1.30
   0 -26  20    0.70    1.60
   0  26 -20    0.60    1.60
   0 -24  18    1.20    1.40
   0  24 -18   -0.80    1.30
   0 -24  18    3.40    1.90
   0 -22  16    0.30    1.40
   0  22 -16   -0.40    1.10
   0 -22  16    0.20    1.30
   0 -20  14    0.60    1.20
   0  20 -14   -1.30    0.90
   0 -20  14    2.50    1.50
   0 -18  12    0.70    0.90
   0 -18  12   -1.00    1.00
   0  18 -12    0.60    0.90
   0 -18  12    0.10    0.90
   0 -16  10    0.00    1.00
   0 -16  10    0.60    0.70
   0  16 -10   -0.20    0.70
   0 -16  10    1.60    0.90
   0 -14   8   -1.00    0.80
   0 -14   8    0.60    0.80
   0  14  -8   -1.00    0.70
   0 -14   8   -0.40    0.60
   0 -12   6   -0.30    0.80
   0  12  -6   -1.10    0.60
   0 -12   6    0.60    0.60
   0 -12   6   -0.50    0.60
   0 -10   4   -0.10    0.40
   0 -10   4   -0.20    0.50
   0  10  -4    0.50    0.50
   0 -10   4    0.40    0.60
   0   8  -2    0.60    0.50
   0  -8   2   -0.40    0.50
   0  -8   2    0.30    0.40
   0  -8   2   -1.30    0.40
   0  -6   0    0.40    0.30
   0   6   0   -0.30    0.30
   0  -6   0    0.40    0.30
   0  -6   0   -0.30    0.40
   0  -4  -2   -0.10    0.30
   0  -4  -2   -0.10    0.10
   0   4   2   -0.10    0.20
   0  -4  -2   -0.20    0.20
   0  -2  -4    0.10    0.20
   0  -2  -4    0.00    0.20
   0   2   4    0.00    0.10
   0   0   6   -0.30    0.30
   0   0   6   -0.30    0.20
   0   0  -6    0.30    0.20
   0   0  -6    0.20    0.30
   0   2  -8    0.20    0.30
   0  -2   8   -0.90    0.40
   0  -2   8    0.20    0.40
   0  -4  10   -0.40    0.40
   0  -4  10    0.20    0.50
   0   4 -10   -0.10    0.40
   0  -4  10    0.10    0.40
   0  -6  12    0.00    0.50
   0   6 -12    0.20    0.50
   0  -6  12    0.10    0.60
   0  -6  12    0.80    0.60
   0  -8  14    0.10    0.70
   0  -8  14    0.50    0.70
   0  -8  14   -0.30    0.70
   0   8 -14    0.20    0.60
   0 -10  16    0.20    0.80
   0 -10  16   -0.80    0.60
   0 -10  16   -0.70    0.70
   0  10 -16   -0.20    0.70
   0  12 -18   -0.30    0.70
   0 -12  18   -0.30    0.70
   0 -12  18   -0.10    0.80
   0 -12  18    0.60    1.00
   0 -14  20   -0.50    1.00
   0 -14  20   -0.10    1.10
   0 -14  20   -1.70    0.70
   0  14 -20    0.30    1.00
   0 -16  22    0.00    1.20
   0  16 -22   -0.20    1.10
   0  18 -24   -0.10    1.30
   0 -18  24    0.20    1.40
   0 -20  26   -1.00    1.50
   0  20 -26   -2.60    1.30
   0  22 -28    1.40    1.60
   0 -22  28    0.70    1.70
   0  24 -30   -1.90    1.70
   0 -24  30   -0.10    1.90
  -1  27 -21    1.40    1.60
  -1 -27  21    2.00    1.80
   1 -27  21    5.50    1.80
   1  27 -21    6.30    2.10
  -1  25 -19    1.50    1.60
  -1 -25  19    2.10    1.60
   1  25 -19    0.30    1.40
   1 -25  19   -0.10    1.70
   1 -25  19    4.30    1.70
  -1 -23  17    1.10    1.40
  -1  23 -17    4.20    1.60
  -1 -23  17    3.60    1.80
   1  23 -17    1.90    1.40
   1 -23  17    3.00    1.50
   1 -23  17    1.50    1.60
  -1  21 -15    2.40    1.20
  -1 -21  15   -0.30    1.30
  -1 -21  15    1.50    1.30
   1 -21  15    0.00    1.40
   1 -21  15    1.20    1.20
   1  21 -15   -0.60    1.10
  -1 -19  13    4.60    1.60
  -1 -19  13    7.80    1.50
  -1 -19  13    6.40    1.70
  -1  19 -13    7.00    1.50
   1  19 -13    6.60    1.50
   1 -19  13    9.50    1.90
   1 -19  13    9.60    1.70
  -1 -17  11   13.90    1.70
  -1 -17  11   11.20    1.40
  -1  17 -11   11.90    1.60
  -1 -17  11   12.10    1.80
   1 -17  11   10.80    1.60
   1 -17  11   11.60    1.90
   1 -17  11   12.70    1.40
   1  17 -11   13.10    1.70
  -1 -15   9   14.40    1.60
  -1 -15   9   15.00    1.50
  -1 -15   9   14.90    1.80
  -1  15  -9   14.20    1.70
   1  15  -9   15.80    1.60
   1 -15   9   13.80    1.30
   1 -15   9   12.40    1.50
   1 -15   9   13.00    1.80
  -1 -13   7   28.40    1.80
  -1 -13   7   26.50    1.80
  -1  13  -7   27.50    1.90
  -1 -13   7   27.00    2.10
   1  13  -7   26.40    1.90
   1 -13   7   26.00    1.90
   1 -13   7   28.40    1.60
   1 -13   7   22.80    1.90
   1 -13   7   29.70    1.80
  -1 -11   5   89.69    3.40
  -1 -11   5   87.09    3.40
  -1 -11   5   90.89    3.80
  -1  11  -5   91.89    3.60
   1 -11   5   85.69    3.50
   1 -11   5   92.29    3.50
   1  11  -5   85.39    3.50
   1 -11   5   88.49    3.20
   1 -11   5   80.09    3.60
  -1  -9   3   38.50    1.80
  -1  -9   3   42.10    1.80
  -1   9  -3   40.70    1.90
  -1  -9   3   42.90    2.10
   1  -9   3   38.70    1.70
   1   9  -3   42.20    1.90
   1  -9   3   44.70    1.90
   1  -9   3   43.60    2.10
   1  -9   3   42.60    1.90
  -1  -7   1  499.25   14.80
  -1  -7   1  483.15   15.00
  -1  -7   1  485.65   14.90
  -1   7  -1  501.15   14.90
   1   7  -1  495.35   15.00
   1  -7   1  468.75   15.10
   1  -7   1  495.55   14.90
   1  -7   1  494.15   14.80
   1  -7   1  513.35   14.80
  -1  -5  -1  261.77    8.10
  -1   5   1  263.17    8.10
  -1  -5  -1  272.07    8.10
  -1  -5  -1  270.07    7.90
   1  -5  -1  271.97    8.20
   1  -5  -1  265.57    8.00
   1   5   1  266.17    8.10
   1  -5  -1  250.97    8.00
   1  -5  -1  260.67    8.00
  -1  -3  -3    4.10    0.40
  -1  -3  -3    3.30    0.40
   1   3   3    3.60    0.40
   1  -3  -3    2.80    0.40
   1  -3  -3    4.50    0.40
  -1  -1  -5   21.40    1.00
  -1  -1  -5   21.30    0.90
  -1   1   5   20.80    0.90
   1   1   5   21.10    0.90
   1  -1  -5   22.80    1.00
   1   1   5   21.40    0.90
   1   1   5   20.10    0.90
  -1  -1   7   56.39    2.10
  -1  -1   7   57.49    2.00
  -1  -1   7   52.49    2.20
   1  -1   7   56.09    2.10
   1  -1   7   56.29    2.10
   1   1  -7   56.79    2.10
   1   1  -7   53.39    1.90
  -1  -3   9    0.40    0.50
  -1  -3   9    0.70    0.40
  -1  -3   9    1.00    0.50
  -1   3  -9    0.70    0.40
   1  -3   9    1.00    0.50
   1   3  -9    1.40    0.40
   1  -3   9    0.80    0.50
  -1  -5  11   13.00    1.20
  -1  -5  11   16.20    1.40
  -1  -5  11   16.40    1.20
  -1   5 -11   14.20    1.10
   1  -5  11   14.70    1.20
   1   5 -11   15.00    1.10
   1  -5  11   13.80    1.20
  -1  -7  13   17.30    1.70
  -1  -7  13   13.60    1.50
  -1  -7  13   13.60    1.40
  -1   7 -13   13.00    1.30
   1  -7  13   15.00    1.50
   1  -7  13   14.20    1.50
   1   7 -13   13.10    1.20
  -1  -9  15   14.10    1.50
  -1  -9  15   14.40    1.70
  -1   9 -15   12.90    1.40
  -1  -9  15   12.70    1.50
   1  -9  15   14.10    1.40
   1  -9  15   12.00    1.50
   1   9 -15   15.30    1.40
   1  -9  15   15.80    1.70
  -1 -11  17    6.60    1.20
  -1 -11  17    7.70    1.40
  -1 -11  17    6.20    1.30
  -1  11 -17    6.70    1.20
   1 -11  17    5.70    1.10
   1  11 -17    7.20    1.20
   1 -11  17    6.00    1.30
   1 -11  17    8.10    1.50
  -1 -13  19   36.80    2.70
  -1 -13  19   38.90    2.50
  -1  13 -19   35.60    2.40
   1 -13  19   32.80    2.50
   1  13 -19   39.10    2.50
   1 -13  19   37.90    2.70
   1 -13  19   33.60    2.20
  -1 -15  21   13.20    1.80
  -1 -15  21   13.80    2.10
  -1  15 -21   13.80    1.90
   1 -15  21   12.30    2.00
   1  15 -21   12.40    1.90
   1 -15  21   16.10    2.10
  -1  17 -23    5.10    1.60
  -1 -17  23    6.00    1.70
   1  17 -23    6.80    1.60
   1 -17  23    4.50    1.70
   1 -17  23    4.10    1.60
  -1  19 -25    1.60    1.50
  -1 -19  25    1.00    1.40
   1 -19  25    0.40    1.50
   1  19 -25    1.20    1.40
  -1 -21  27    1.90    1.90
  -1  21 -27   -0.20    1.60
   1  21 -27   -1.70    1.50
   1 -21  27    1.00    1.70
  -1  23 -29    6.00    2.20
  -1 -23  29    0.40    1.80
   1 -23  29    3.10    2.00
   1  23 -29    4.60    2.10
  -2  28 -22    0.70    1.70
   2  28 -22    2.90    2.00
   2 -28  22    6.00    2.20
  -2  26 -20    2.60    1.70
  -2 -26  20    4.50    1.90
   2  26 -20    4.80    1.90
   2 -26  20    1.10    1.70
   2 -26  20    6.00    2.30
  -2  24 -18   13.20    2.20
  -2 -24  18   18.10    2.40
   2  24 -18   12.30    2.20
   2 -24  18   18.80    2.60
   2 -24  18   17.60    2.80
  -2  22 -16   -0.60    1.10
  -2 -22  16   -0.50    1.20
  -2 -22  16    1.30    1.60
   2  22 -16   -0.90    1.00
   2 -22  16    0.50    1.40
   2 -22  16   -0.70    1.20
  -2 -20  14    2.00    1.40
  -2  20 -14    2.60    1.20
  -2 -20  14    2.60    1.30
   2 -20  14    0.90    1.10
   2  20 -14    0.80    1.20
   2 -20  14    2.70    1.40
  -2 -18  12    3.90    1.20
  -2 -18  12    3.70    1.20
  -2  18 -12    0.70    1.00
  -2 -18  12    2.30    1.30
   2 -18  12    2.70    1.30
   2 -18  12    4.70    1.30
   2  18 -12    2.70    1.00
  -2 -16  10   31.00    2.40
  -2  16 -10   29.90    2.20
  -2 -16  10   28.30    2.00
  -2 -16  10   30.10    2.10
   2  16 -10   32.00    2.20
   2 -16  10   29.80    2.40
   2 -16  10   28.20    1.70
   2 -16  10   31.80    2.20
   2 -16  10   26.30    2.00
  -2 -14   8   50.49    2.90
  -2 -14   8   45.20    2.50
  -2  14  -8   51.99    2.60
  -2 -14   8   51.09    2.60
   2  14  -8   49.60    2.60
   2 -14   8   48.80    2.20
   2 -14   8   47.40    2.60
   2 -14   8   53.69    2.70
   2 -14   8   48.40    2.90
  -2  12  -6    8.30    1.10
  -2 -12   6    8.30    1.10
  -2 -12   6    8.00    1.10
  -2 -12   6    7.30    1.30
   2 -12   6    7.30    0.80
   2 -12   6    7.20    1.10
   2 -12   6    7.10    1.10
   2 -12   6    6.70    1.20
   2  12  -6    6.80    1.10
  -2 -10   4    5.40    0.90
  -2  10  -4    7.40    1.00
  -2 -10   4    7.10    1.10
  -2 -10   4    6.80    0.90
   2 -10   4    6.30    0.90
   2 -10   4    5.60    0.60
   2 -10   4    8.70    1.10
   2  10  -4    5.50    0.90
   2 -10   4    4.90    0.80
  -2   8  -2    0.30    0.40
  -2  -8   2    0.10    0.40
  -2  -8   2    0.30    0.50
  -2  -8   2    0.10    0.50
   2   8  -2   -0.50    0.40
   2  -8   2    0.00    0.30
   2  -8   2    0.30    0.40
   2  -8   2   -0.10    0.40
   2  -8   2    0.20    0.40
  -2  -6   0   93.09    3.40
  -2   6   0  100.39    3.30
  -2  -6   0   94.49    3.30
   2   6   0   98.09    3.40
   2  -6   0  101.99    3.20
   2  -6   0   92.29    3.10
   2  -6   0   99.29    3.30
   2  -6   0   95.89    3.40
  -2  -4  -2   22.00    1.10
  -2   4   2   19.70    0.90
  -2  -4  -2   19.20    0.90
   2  -4  -2   19.80    0.80
   2   4   2   20.30    1.00
  -2  -2  -4    3.90    0.50
   2  -2  -4    3.60    0.50
   2   2   4    2.70    0.40
   2   2   4    3.40    0.40
   2   2   4    3.10    0.40
  -2   0   6   33.30    1.60
  -2   0  -6   32.60    1.30
   2   0  -6   34.00    1.40
   2   0   6   34.00    1.40
   2   0   6   35.00    1.40
   2   0  -6   32.30    1.10
  -2  -2   8   10.80    1.00
  -2   2  -8    9.70    0.70
  -2   2  -8   10.70    0.80
  -2  -2   8   10.30    1.00
   2  -2   8    9.30    0.80
   2  -2   8   10.60    0.90
   2   2  -8   11.90    0.70
  -2   4 -10    1.30    0.50
  -2  -4  10    1.40    0.60
  -2  -4  10    0.90    0.60
   2  -4  10    1.80    0.60
   2  -4  10    0.70    0.40
   2   4 -10    1.30    0.40
  -2  -6  12    1.60    0.70
  -2  -6  12    0.00    0.60
  -2   6 -12   -0.50    0.50
   2  -6  12    0.30    0.60
   2  -6  12   -0.30    0.70
   2   6 -12   -0.30    0.50
  -2  -8  14    4.90    1.10
  -2   8 -14    3.80    0.90
  -2  -8  14    4.50    1.00
   2  -8  14    5.60    1.10
   2  -8  14    3.80    1.10
   2   8 -14    4.30    0.90
  -2 -10  16    2.90    1.00
  -2  10 -16    0.10    0.70
  -2 -10  16    3.60    1.00
   2 -10  16    2.20    0.90
   2  10 -16    2.40    0.80
   2 -10  16    2.10    0.90
  -2 -12  18   14.60    1.80
  -2 -12  18   14.30    1.80
  -2  12 -18   15.30    1.70
   2  12 -18   15.30    1.60
   2 -12  18   14.20    1.80
   2 -12  18   16.80    1.80
  -2 -14  20   48.60    3.20
  -2 -14  20   52.19    3.20
  -2  14 -20   54.49    3.10
   2 -14  20   45.90    3.10
   2  14 -20   52.29    3.00
   2 -14  20   51.29    3.30
  -2  16 -22   11.50    1.90
  -2 -16  22    8.90    1.90
  -2 -16  22   12.30    1.90
   2  16 -22    9.50    1.70
   2 -16  22   10.50    1.90
   2 -16  22   10.40    2.10
  -2 -18  24    3.40    1.70
  -2  18 -24    1.30    1.30
   2 -18  24   -0.50    1.20
   2 -18  24    0.60    1.40
   2  18 -24   -0.30    1.20
  -2  20 -26   -0.30    1.40
  -2 -20  26   -0.20    1.50
   2 -20  26    2.40    1.70
   2  20 -26   -0.30    1.40
  -2 -22  28    1.80    1.90
  -2  22 -28   -0.10    1.60
   2 -22  28    0.90    1.80
   2  22 -28    5.50    1.90
  -2  24 -30    2.50    2.00
  -2 -24  30    3.50    2.20
   2  24 -30    2.90    1.90
   2 -24  30   -0.40    2.10
  -3  27 -21    0.80    1.60
   3 -27  21    3.00    2.20
   3  27 -21    2.50    1.90
   3 -27  21    0.60    1.80
  -3 -25  19    1.80    1.60
  -3  25 -19   -0.30    1.40
   3 -25  19    0.70    1.50
   3 -25  19    0.40    1.70
   3  25 -19   -0.40    1.40
  -3 -23  17    1.70    1.40
  -3  23 -17    5.30    1.70
   3  23 -17    3.20    1.50
   3 -23  17    2.20    1.70
   3 -23  17    4.80    1.70
  -3 -21  15    1.30    1.30
  -3  21 -15    1.70    1.30
   3 -21  15   -0.20    1.40
   3  21 -15    1.00    1.20
   3 -21  15    0.40    1.30
  -3 -19  13   -0.20    1.00
  -3  19 -13    3.10    1.20
  -3 -19  13    2.50    1.30
  -3 -19  13    0.40    1.00
   3 -19  13    0.30    1.10
   3 -19  13   -0.50    0.90
   3  19 -13    2.20    1.10
   3 -19  13    2.60    1.40
  -3  17 -11    0.00    0.80
  -3 -17  11   -0.70    1.00
  -3 -17  11    2.30    1.00
  -3 -17  11    0.60    1.00
   3 -17  11    0.20    1.00
   3 -17  11   -0.50    0.80
   3 -17  11    1.90    1.10
   3  17 -11    0.40    0.90
  -3 -15   9   -0.30    0.80
  -3 -15   9    1.30    1.00
  -3 -15   9    1.10    0.90
  -3  15  -9    0.80    0.80
   3  15  -9    2.20    0.80
   3 -15   9    1.70    0.50
   3 -15   9    1.70    0.90
   3 -15   9   -0.30    0.80
   3 -15   9    0.30    0.80
  -3 -13   7   29.40    2.20
  -3 -13   7   35.00    2.00
  -3  13  -7   36.70    2.10
  -3 -13   7   32.80    2.10
   3  13  -7   32.60    2.10
   3 -13   7   32.80    1.50
   3 -13   7   29.30    2.20
   3 -13   7   31.30    2.00
   3 -13   7   33.70    2.10
  -3 -11   5    0.70    0.70
  -3  11  -5    0.60    0.70
  -3 -11   5    2.60    1.00
  -3 -11   5    1.70    0.70
   3 -11   5    0.90    0.40
   3  11  -5    1.70    0.80
   3 -11   5    0.50    0.70
   3 -11   5    1.70    0.80
   3 -11   5    1.40    0.90
  -3   9  -3   12.50    1.10
  -3  -9   3   14.80    1.20
  -3  -9   3   13.10    1.30
   3  -9   3   13.40    1.10
   3   9  -3   13.40    1.10
   3  -9   3   12.50    0.70
   3  -9   3   14.30    1.10
   3  -9   3   15.60    1.30
  -3  -7   1   65.49    2.50
  -3  -7   1   64.39    2.60
  -3   7  -1   63.69    2.40
   3  -7   1   64.69    2.40
   3  -7   1   64.09    2.40
   3  -7   1   60.59    2.50
   3  -7   1   61.89    2.10
   3   7  -1   67.59    2.50
  -3   5   1   16.80    0.90
  -3  -5  -1   14.60    1.10
  -3  -5  -1   16.10    0.90
   3  -5  -1   15.70    0.90
   3  -5  -1   17.40    1.00
   3  -5  -1   17.00    0.80
   3   5   1   16.00    1.00
  -3   3   3   17.50    0.80
  -3  -3  -3   17.80    1.00
   3  -3  -3   16.90    0.70
   3   3   3   17.90    1.00
   3  -3  -3   18.70    1.00
  -3   1   5   25.20    1.30
  -3  -1  -5   25.30    1.10
   3   1   5   25.90    1.20
   3   1   5   24.30    1.10
   3  -1  -5   24.50    1.20
   3   1   5   25.10    1.20
  -3   1  -7  194.88    6.10
  -3  -1   7  191.58    6.40
   3  -1   7  200.08    6.30
   3  -1   7  190.88    6.30
   3   1  -7  199.38    6.00
  -3   3  -9    0.30    0.30
  -3  -3   9    0.80    0.60
  -3   3  -9    0.40    0.40
   3  -3   9    1.20    0.50
   3   3  -9    0.50    0.30
   3  -3   9    0.70    0.50
  -3  -5  11    6.30    1.00
  -3   5 -11    4.70    0.80
  -3  -5  11    3.40    0.90
   3   5 -11    3.80    0.60
   3  -5  11    5.80    0.90
   3  -5  11    5.20    0.90
   3  -5  11    5.80    0.90
  -3  -7  13   21.10    1.70
  -3  -7  13   23.20    1.80
  -3   7 -13   23.80    1.70
   3  -7  13   22.10    1.80
   3  -7  13   22.40    1.80
   3  -7  13   22.90    1.80
   3   7 -13   22.90    1.50
  -3  -9  15    5.80    1.20
  -3   9 -15    5.00    1.00
  -3  -9  15    3.80    1.10
   3  -9  15    8.10    1.30
   3  -9  15    4.80    1.20
   3   9 -15    6.50    1.10
  -3 -11  17   23.10    2.00
  -3 -11  17   23.60    2.20
  -3  11 -17   20.90    1.80
   3  11 -17   26.00    1.80
   3 -11  17   19.30    1.90
   3 -11  17   21.70    2.20
  -3  13 -19   22.80    2.20
  -3 -13  19   22.80    2.30
  -3 -13  19   27.90    2.30
   3  13 -19   24.90    2.00
   3 -13  19   22.60    2.30
   3 -13  19   18.10    2.00
  -3  15 -21   12.50    1.90
  -3 -15  21   19.70    2.30
  -3 -15  21   19.70    2.30
   3  15 -21   18.40    2.20
   3 -15  21   21.00    2.60
   3 -15  21   16.40    2.10
  -3 -17  23    0.00    1.20
  -3  17 -23   -0.60    1.10
  -3 -17  23    0.30    1.30
   3 -17  23   -0.10    1.40
   3 -17  23   -0.10    1.00
   3  17 -23   -0.10    1.20
  -3 -19  25    2.60    1.70
  -3  19 -25   -1.60    1.30
   3  19 -25   -0.50    1.30
   3 -19  25    0.80    1.50
   3 -19  25   -1.60    1.10
  -3 -21  27    1.40    1.60
  -3  21 -27    1.90    1.70
   3 -21  27    2.40    1.90
   3  21 -27    0.00    1.60
  -3 -23  29    4.40    2.20
  -3  23 -29    4.40    2.00
   3  23 -29    5.20    1.90
   3 -23  29    7.30    2.30
  -4  28 -22   -0.90    1.60
   4 -28  22    0.70    1.80
   4  28 -22   -0.90    1.70
  -4  26 -20   -1.60    1.40
   4  26 -20    0.30    1.60
   4 -26  20    0.30    1.60
   4 -26  20   -0.10    1.70
  -4  24 -18    2.90    1.60
  -4 -24  18   -0.30    1.30
   4 -24  18    2.60    1.70
   4  24 -18    1.60    1.50
   4 -24  18    3.60    1.70
  -4 -22  16   -0.40    1.20
  -4  22 -16    0.90    1.40
   4  22 -16    1.20    1.40
   4 -22  16    0.40    1.30
   4 -22  16   -0.20    1.30
  -4  20 -14    5.10    1.50
  -4 -20  14    4.10    1.50
  -4 -20  14    4.70    1.50
   4 -20  14    3.80    1.40
   4 -20  14   10.60    2.10
   4 -20  14    8.30    1.70
   4  20 -14    6.30    1.60
  -4 -18  12    5.40    1.60
  -4 -18  12    6.00    1.40
  -4 -18  12    7.10    1.50
  -4  18 -12    3.60    1.20
   4  18 -12    6.50    1.40
   4 -18  12    5.50    1.50
   4 -18  12    4.20    1.20
   4 -18  12    6.50    1.50
  -4 -16  10    8.90    1.40
  -4  16 -10    8.40    1.40
  -4 -16  10    5.80    1.40
  -4 -16  10    8.00    1.40
   4 -16  10    6.60    1.20
   4 -16  10    9.90    1.60
   4  16 -10    5.20    1.10
   4 -16  10    8.00    1.40
  -4 -14   8    4.90    1.20
  -4 -14   8    8.20    1.30
  -4  14  -8    7.40    1.20
  -4 -14   8    8.90    1.30
   4 -14   8    8.40    1.20
   4 -14   8    6.00    0.70
   4 -14   8    6.80    1.20
   4  14  -8    7.70    1.20
   4 -14   8    9.90    1.50
  -4 -12   6   29.60    2.00
  -4 -12   6   32.30    2.10
  -4  12  -6   25.80    1.80
   4 -12   6   27.50    2.00
   4  12  -6   29.60    1.90
   4 -12   6   24.70    1.10
   4 -12   6   29.40    1.90
   4 -12   6   27.00    1.80
  -4  10  -4    3.30    0.80
  -4 -10   4    2.30    0.90
  -4 -10   4    1.90    0.90
   4 -10   4    2.10    0.70
   4 -10   4    3.20    0.90
   4  10  -4    2.50    0.80
   4 -10   4    1.90    0.80
  -4   8  -2   28.80    1.60
  -4  -8   2   31.30    1.70
  -4  -8   2   29.80    1.60
   4  -8   2   29.20    1.70
   4  -8   2   28.80    1.50
   4  -8   2   30.20    1.60
   4   8  -2   28.40    1.50
   4  -8   2   27.70    1.20
  -4   6   0    0.60    0.40
  -4  -6   0    0.90    0.40
  -4  -6   0    1.00    0.50
   4  -6   0    0.70    0.40
   4  -6   0    0.90    0.40
   4   6   0    0.20    0.40
   4  -6   0    0.40    0.40
  -4  -4  -2  140.79    4.80
  -4   4   2  144.49    4.50
  -4  -4  -2  140.49    4.40
  -4   4   2  141.99    4.60
   4  -4  -2  142.19    4.70
   4   4   2  141.69    4.70
   4  -4  -2  141.09    4.50
  -4  -2  -4   46.60    1.80
  -4   2   4   43.90    1.90
   4   2   4   44.50    1.80
   4  -2  -4   42.40    1.70
   4   2   4   42.50    1.80
  -4   0   6    0.20    0.50
  -4   0  -6    0.10    0.30
   4   0   6    0.10    0.40
   4   0  -6    0.30    0.30
   4   0  -6   -0.60    0.20
   4   0   6    0.30    0.40
  -4  -2   8   24.60    1.50
  -4   2  -8   24.30    1.10
   4  -2   8   25.10    1.40
   4   2  -8   24.70    1.30
   4   2  -8   26.20    1.10
   4  -2   8   25.70    1.30
   4  -2   8   22.40    1.30
  -4   4 -10   40.00    1.60
  -4   4 -10   41.30    2.00
  -4  -4  10   40.40    2.20
   4  -4  10   44.30    2.10
   4  -4  10   39.40    1.90
   4   4 -10   43.00    1.80
   4  -4  10   43.90    2.10
  -4   6 -12   26.90    1.80
  -4  -6  12   26.30    1.90
  -4   6 -12   25.90    1.30
   4   6 -12   25.50    1.50
   4  -6  12   28.80    1.90
   4  -6  12   28.40    1.80
   4  -6  12   24.90    1.80
  -4  -8  14    1.50    0.90
  -4   8 -14   -0.30    0.70
  -4  -8  14    0.00    0.80
   4  -8  14    0.40    0.70
   4   8 -14    0.20    0.50
   4  -8  14    0.00    0.80
   4  -8  14   -1.10    0.60
  -4 -10  16    8.00    1.40
  -4  10 -16    7.90    1.30
  -4 -10  16   11.50    1.60
   4  10 -16    8.80    1.20
   4 -10  16    9.20    1.40
   4 -10  16    9.50    1.40
   4 -10  16    6.40    1.30
  -4 -12  18    3.50    1.20
  -4 -12  18    3.20    1.20
  -4  12 -18    2.20    0.90
   4  12 -18    3.00    1.00
   4 -12  18    2.00    1.00
   4 -12  18    3.40    1.20
  -4  14 -20   15.10    2.00
  -4 -14  20   15.40    2.10
  -4 -14  20   14.10    2.00
   4 -14  20   14.20    2.00
   4  14 -20   15.70    1.80
   4 -14  20   12.40    1.90
  -4 -16  22    1.60    1.30
  -4 -16  22    1.20    1.40
  -4  16 -22    1.30    1.20
   4 -16  22    2.00    1.40
   4 -16  22    3.60    1.40
   4  16 -22    3.60    1.40
  -4 -18  24    0.30    1.40
  -4 -18  24    0.90    1.50
  -4  18 -24    2.50    1.50
   4 -18  24    3.20    1.80
   4  18 -24    3.20    1.60
   4 -18  24    2.80    1.40
  -4 -20  26    2.70    1.80
  -4  20 -26    1.80    1.60
   4 -20  26    0.10    1.60
   4  20 -26   -0.10    1.40
   4 -20  26    0.20    1.40
  -4  22 -28    0.50    1.80
   4 -22  28   -1.90    1.20
   4 -22  28    3.50    2.10
   4  22 -28    0.70    1.70
  -5  27 -21   -0.70    1.60
   5 -27  21    0.70    2.00
   5 -27  21    0.60    1.70
   5  27 -21    2.30    1.80
  -5  25 -19    5.40    1.80
   5 -25  19    6.70    2.00
   5 -25  19    9.80    2.40
   5  25 -19    7.90    2.20
  -5  23 -17    1.90    1.40
   5 -23  17    2.30    1.50
   5 -23  17    3.10    1.70
   5 -23  17    5.40    1.80
   5  23 -17    2.10    1.50
  -5 -21  15    2.50    1.50
  -5  21 -15    0.60    1.20
   5 -21  15    4.30    1.80
   5 -21  15    2.90    1.30
   5 -21  15    1.00    1.20
   5  21 -15    2.80    1.40
  -5  19 -13    3.20    1.30
  -5 -19  13    3.30    1.40
   5 -19  13    1.10    1.30
   5 -19  13    5.20    1.70
   5 -19  13    3.30    1.30
   5  19 -13    3.30    1.30
  -5 -17  11    4.60    1.30
  -5  17 -11    3.90    1.20
   5 -17  11    4.80    1.30
   5 -17  11    3.40    1.10
   5 -17  11    4.00    1.40
   5  17 -11    2.50    1.10
  -5  15  -9   15.70    1.70
  -5 -15   9   17.40    1.90
   5 -15   9   16.10    1.80
   5 -15   9   18.60    1.90
   5 -15   9   15.20    1.90
   5  15  -9   16.50    1.70
  -5  13  -7    2.50    0.90
  -5 -13   7    2.60    1.00
  -5 -13   7    2.40    1.00
   5 -13   7    3.00    0.90
   5 -13   7    3.20    0.90
   5  13  -7    3.50    0.90
   5 -13   7    4.70    1.10
  -5 -11   5   -0.80    0.70
  -5 -11   5    0.50    0.80
  -5  11  -5   -0.50    0.60
   5 -11   5    0.70    0.80
   5 -11   5    0.50    0.80
   5 -11   5    0.20    0.70
   5  11  -5   -0.30    0.60
  -5  -9   3    6.50    1.00
  -5   9  -3    6.90    1.00
  -5  -9   3    5.70    1.00
   5  -9   3    5.80    1.00
   5  -9   3    6.20    1.00
   5   9  -3    4.70    0.90
   5  -9   3    4.60    0.80
  -5  -7   1   23.10    1.30
  -5   7  -1   22.90    1.30
  -5  -7   1   20.40    1.40
   5   7  -1   22.60    1.40
   5  -7   1   22.50    1.40
   5  -7   1   23.20    1.40
   5  -7   1   21.20    1.20
  -5   5   1   16.00    0.90
  -5  -5  -1   17.40    1.20
  -5   5   1   16.90    1.00
   5   5   1   15.10    1.00
   5  -5  -1   15.20    0.90
   5  -5  -1   13.80    1.00
  -5   3   3   16.80    1.10
  -5  -3  -3   18.80    1.20
   5   3   3   17.80    1.10
   5  -3  -3   16.40    0.90
   5  -3  -3   15.20    1.00
  -5   1   5   -0.10    0.40
  -5  -1  -5    0.10    0.40
   5   1   5   -0.20    0.40
   5  -1  -5    0.30    0.30
   5  -1  -5    0.40    0.40
   5   1   5   -0.60    0.30
   5   1   5    0.40    0.40
  -5   1  -7   54.39    2.00
  -5  -1   7   53.09    2.40
   5   1  -7   52.99    2.00
   5   1  -7   52.29    2.20
   5  -1   7   49.80    2.20
   5  -1   7   54.59    2.20
   5  -1   7   51.89    1.90
  -5   3  -9   85.39    2.90
  -5  -3   9   86.79    3.60
   5   3  -9   86.59    3.10
   5  -3   9   85.39    3.40
   5  -3   9   92.79    3.40
   5   3  -9   82.59    3.30
   5  -3   9   89.49    3.20
  -5   5 -11   31.50    2.00
  -5   5 -11   31.20    1.40
  -5  -5  11   39.00    2.20
   5  -5  11   35.00    2.00
   5  -5  11   33.80    1.90
   5  -5  11   34.90    2.00
   5   5 -11   33.90    1.70
  -5  -7  13    0.90    0.90
  -5   7 -13    0.80    0.70
  -5   7 -13    1.20    0.40
   5  -7  13    1.00    0.80
   5  -7  13    0.20    0.70
   5   7 -13    0.80    0.60
   5  -7  13    0.80    0.70
  -5   9 -15    6.10    1.20
  -5  -9  15    7.70    1.40
  -5   9 -15    6.80    0.70
   5  -9  15    9.20    1.50
   5  -9  15    8.10    1.30
   5  -9  15    8.70    1.30
   5   9 -15    7.30    1.10
  -5 -11  17    0.60    0.90
  -5  11 -17    0.70    0.80
   5 -11  17   -0.60    0.60
   5  11 -17    0.80    0.80
   5 -11  17    0.70    0.90
   5 -11  17   -0.10    0.80
  -5  13 -19    3.80    1.20
  -5 -13  19    4.90    1.50
   5  13 -19    6.80    1.40
   5 -13  19    7.00    1.50
   5 -13  19    7.50    1.60
   5 -13  19    8.00    1.60
  -5 -15  21    6.50    1.80
  -5  15 -21    8.30    1.80
   5 -15  21    8.30    1.80
   5 -15  21    6.70    1.60
   5  15 -21    7.00    1.50
  -5 -17  23   13.70    2.30
  -5  17 -23    8.60    1.80
   5  17 -23   13.60    2.10
   5 -17  23   10.60    2.20
   5 -17  23    7.40    1.70
  -5 -19  25    1.30    2.10
  -5  19 -25    2.60    1.50
   5  19 -25    2.80    1.50
   5 -19  25    1.60    1.20
   5 -19  25    0.60    1.60
  -5  21 -27    3.30    1.90
   5  21 -27    1.00    1.70
   5 -21  27    2.60    1.80
   5 -21  27    0.30    1.40
  -5  23 -29   -1.80    1.60
   5 -23  29    1.90    2.00
   5 -23  29    1.40    1.70
   5  23 -29   -0.50    1.80
  -6  26 -20   -0.90    1.40
   6 -26  20    0.20    1.70
   6 -26  20    0.60    1.70
   6  26 -20   -1.20    1.60
  -6  24 -18    6.50    1.90
   6 -24  18    6.00    1.90
   6 -24  18    4.40    1.70
   6 -24  18    5.30    2.00
   6  24 -18    5.30    2.00
  -6 -22  16    1.50    1.50
  -6  22 -16    0.60    1.30
   6 -22  16    0.50    1.30
   6  22 -16    0.20    1.30
   6 -22  16    1.60    1.50
   6 -22  16    0.90    1.50
  -6  20 -14    7.30    1.60
  -6 -20  14    8.40    1.80
   6 -20  14    8.70    1.70
   6 -20  14   10.30    1.90
   6 -20  14    9.00    2.00
   6  20 -14   11.40    1.90
  -6  18 -12    0.60    1.00
  -6 -18  12    1.90    1.30
   6  18 -12    4.00    1.30
   6 -18  12    1.90    1.30
   6 -18  12    3.20    1.50
   6 -18  12    1.10    1.10
  -6  16 -10    0.20    0.80
  -6 -16  10    0.00    1.00
   6 -16  10    1.20    1.00
   6 -16  10   -0.20    0.80
   6 -16  10    0.20    0.90
   6  16 -10    1.60    0.90
  -6  14  -8   83.09    3.70
  -6 -14   8   78.59    3.80
   6 -14   8   80.29    3.90
   6  14  -8   82.99    3.70
   6 -14   8   77.39    3.60
   6 -14   8   75.69    3.60
  -6  12  -6    4.40    1.00
  -6 -12   6    4.40    1.00
   6 -12   6    5.10    1.10
   6  12  -6    3.70    0.90
   6 -12   6    6.00    1.20
   6 -12   6    5.10    1.00
  -6  10  -4    0.60    0.70
  -6 -10   4    1.00    0.80
   6 -10   4    0.00    0.60
   6 -10   4    0.70    0.80
   6 -10   4    0.60    0.70
   6  10  -4   -1.30    0.60
  -6  -8   2   38.30    2.20
  -6   8  -2   41.10    2.00
   6  -8   2   43.00    2.10
   6   8  -2   41.30    2.10
   6  -8   2   38.70    1.90
   6  -8   2   39.50    2.10
  -6   6   0   14.00    1.10
  -6   6   0   15.90    1.00
  -6  -6   0   14.90    1.30
   6  -6   0   15.00    1.20
   6  -6   0   16.70    1.10
   6   6   0   17.10    1.20
   6  -6   0   15.90    1.10
  -6  -4  -2    1.70    0.60
  -6   4   2    1.80    0.50
   6  -4  -2    1.00    0.40
   6  -4  -2    0.60    0.40
   6   4   2    1.80    0.50
  -6   2   4    3.00    0.60
  -6  -2  -4    3.90    0.70
   6  -2  -4    2.80    0.50
   6   2   4    2.40    0.60
   6  -2  -4    3.90    0.60
   6   2   4    3.20    0.70
  -6   0  -6    0.40    0.40
  -6   0   6    0.90    0.50
   6   0   6    0.50    0.50
   6   0   6    0.40    0.30
   6   0  -6    0.50    0.40
   6   0  -6    0.10    0.30
   6   0   6    1.10    0.50
   6   0   6    0.70    0.50
  -6  -2   8  231.98    7.90
  -6   2  -8  235.08    7.30
   6  -2   8  233.78    7.40
   6   2  -8  230.18    7.40
   6  -2   8  238.88    7.80
   6   2  -8  238.78    7.60
   6  -2   8  231.08    7.70
  -6  -4  10   28.40    2.00
  -6   4 -10   25.40    1.20
   6  -4  10   27.60    1.80
   6   4 -10   27.90    1.70
   6  -4  10   24.90    1.50
   6  -4  10   25.10    1.70
   6   4 -10   27.10    1.50
  -6  -6  12   92.29    4.10
  -6   6 -12   95.59    3.90
  -6   6 -12   88.49    3.10
   6   6 -12   90.19    3.50
   6  -6  12   90.99    3.70
   6  -6  12   96.99    3.90
   6  -6  12   95.49    3.90
  -6   8 -14  107.09    4.50
  -6   8 -14  100.89    3.60
  -6  -8  14  112.09    4.70
   6   8 -14  114.69    4.20
   6  -8  14  100.69    4.40
   6  -8  14  109.59    4.50
   6  -8  14  116.09    4.60
  -6  10 -16    1.20    0.90
  -6 -10  16    1.80    1.00
   6 -10  16    1.30    0.90
   6 -10  16    1.70    1.00
   6  10 -16    0.00    0.60
   6 -10  16    0.20    0.80
  -6 -12  18    2.80    1.30
  -6  12 -18    1.60    1.00
   6 -12  18    2.20    1.20
   6 -12  18    0.80    1.00
   6 -12  18    1.70    1.00
   6  12 -18    0.30    0.80
  -6 -14  20   76.79    4.10
  -6  14 -20   68.19    3.80
   6  14 -20   63.29    3.50
   6 -14  20   71.19    4.00
   6 -14  20   62.39    3.80
   6 -14  20   64.79    3.90
  -6 -16  22   46.80    3.60
  -6  16 -22   43.20    3.20
   6 -16  22   46.90    3.50
   6 -16  22   47.80    3.40
   6  16 -22   42.10    3.10
  -6  18 -24   -0.90    1.20
  -6 -18  24   -1.00    1.40
   6 -18  24    0.40    1.10
   6  18 -24   -1.50    1.20
   6 -18  24   -0.40    1.50
  -6  20 -26    1.00    1.50
   6 -20  26    0.60    1.80
   6  20 -26   -1.20    1.40
   6 -20  26    0.70    1.40
  -6  22 -28    2.60    1.80
   6  22 -28    2.00    1.80
   6 -22  28    0.40    1.50
   6 -22  28    1.30    1.90
  -7  27 -21    7.10    2.20
   7 -27  21    7.90    2.40
   7 -27  21    3.80    2.20
   7  27 -21    3.60    2.00
  -7  25 -19   -1.70    1.40
   7 -25  19    0.80    1.80
   7 -25  19   -0.10    1.40
   7  25 -19   -0.30    1.50
   7 -25  19    3.00    1.80
  -7  23 -17    6.10    1.70
  -7 -23  17    4.60    1.90
   7  23 -17    4.60    1.80
   7 -23  17    5.10    1.70
   7 -23  17    5.20    1.80
   7 -23  17    6.50    2.10
  -7 -21  15    5.60    1.80
  -7  21 -15    7.50    1.70
   7 -21  15    4.90    1.60
   7 -21  15    5.30    1.80
   7  21 -15    7.50    1.70
   7 -21  15   10.50    2.10
  -7  19 -13    0.20    1.10
  -7 -19  13   -0.20    1.30
   7  19 -13    3.70    1.40
   7 -19  13   -1.60    0.90
   7 -19  13   -0.50    1.20
   7 -19  13    0.40    1.20
  -7 -17  11   -0.10    1.10
  -7  17 -11    0.80    1.00
   7 -17  11    0.40    1.00
   7  17 -11   -0.70    1.00
   7 -17  11   -0.20    1.10
   7 -17  11    1.20    1.20
  -7  15  -9   29.50    2.20
  -7 -15   9   31.90    2.40
   7 -15   9   32.30    2.20
   7  15  -9   30.30    2.20
   7 -15   9   28.90    2.30
   7 -15   9   31.40    2.50
  -7 -13   7    9.60    1.50
  -7  13  -7    9.20    1.30
   7  13  -7    8.90    1.30
   7 -13   7    8.10    1.30
   7 -13   7    8.40    1.30
   7 -13   7    7.00    1.30
  -7 -11   5    5.60    1.20
  -7  11  -5    4.00    1.00
   7 -11   5    3.00    0.90
   7  11  -5    4.90    1.00
   7 -11   5    4.80    1.00
   7 -11   5    4.10    1.00
  -7   9  -3    3.60    0.80
  -7  -9   3    2.70    1.00
   7  -9   3    0.80    0.70
   7   9  -3    1.90    0.80
   7  -9   3    2.50    0.90
   7  -9   3    2.90    0.80
  -7   7  -1   11.40    1.20
  -7  -7   1    9.80    1.30
   7  -7   1   10.70    1.10
   7  -7   1   10.50    1.20
   7   7  -1   11.30    1.20
   7  -7   1   10.80    1.20
  -7   5   1   27.10    1.40
  -7  -5  -1   27.20    1.70
   7  -5  -1   26.30    1.50
   7   5   1   27.10    1.60
   7  -5  -1   27.50    1.40
  -7  -3  -3    0.80    0.50
  -7   3   3    1.10    0.50
   7   3   3    0.90    0.50
   7  -3  -3    0.70    0.40
   7  -3  -3    1.10    0.40
  -7   1   5    0.30    0.50
  -7  -1  -5    0.50    0.50
   7   1   5    1.10    0.60
   7  -1  -5    1.60    0.40
   7   1   5    0.40    0.50
   7  -1  -5    0.60    0.40
  -7   1  -7   28.30    1.40
  -7  -1   7   27.30    1.80
   7  -1   7   29.40    1.70
   7  -1   7   26.50    1.60
   7   1  -7   25.70    1.40
   7  -1   7   28.70    1.20
   7   1  -7   28.50    1.50
  -7  -3   9   -0.70    0.70
  -7   3  -9   -0.20    0.40
   7   3  -9    0.00    0.50
   7  -3   9    1.20    0.70
   7  -3   9   -0.40    0.40
   7   3  -9   -0.70    0.40
   7  -3   9    0.80    0.70
  -7  -5  11   -0.20    0.80
  -7   5 -11    0.40    0.40
   7   5 -11    0.10    0.50
   7  -5  11    0.20    0.70
   7   5 -11    0.60    0.60
   7  -5  11    0.40    0.60
   7  -5  11    0.50    0.80
  -7   7 -13   34.90    1.50
  -7  -7  13   38.10    2.50
  -7   7 -13   36.90    2.30
   7   7 -13   34.30    2.10
   7  -7  13   37.80    2.30
   7  -7  13   39.00    2.40
   7  -7  13   42.60    2.20
   7   7 -13   37.80    2.00
  -7   9 -15    2.60    0.90
  -7  -9  15    4.50    1.30
   7   9 -15    2.00    0.80
   7  -9  15    3.50    1.00
   7  -9  15    3.60    1.10
   7  -9  15    4.90    1.20
  -7 -11  17    5.90    1.40
  -7  11 -17    5.00    1.20
   7 -11  17    5.90    1.30
   7 -11  17    4.70    1.20
   7  11 -17    7.50    1.20
   7 -11  17    6.10    1.20
  -7 -13  19    1.60    1.30
  -7  13 -19    1.80    1.20
   7 -13  19    0.10    1.10
   7 -13  19    1.10    1.10
   7 -13  19    1.70    1.10
   7  13 -19    2.20    1.10
  -7 -15  21   36.40    3.30
  -7  15 -21   29.50    2.90
   7 -15  21   29.30    2.90
   7  15 -21   25.30    2.50
   7 -15  21   27.50    2.80
   7 -15  21   36.80    3.40
  -7 -17  23   25.70    3.00
  -7  17 -23   16.50    2.30
   7 -17  23   21.90    2.70
   7  17 -23   22.00    2.50
   7 -17  23   21.70    2.80
  -7  19 -25   -0.70    1.20
  -7 -19  25   -1.70    1.50
   7 -19  25    2.80    2.00
   7  19 -25    0.00    1.40
   7 -19  25    2.40    1.50
  -7  21 -27    0.80    1.50
   7 -21  27    0.10    1.80
   7  21 -27   -1.30    1.60
   7 -21  27   -0.60    1.20
  -7  23 -29    2.40    1.90
   7  23 -29    2.10    2.00
   7 -23  29    4.50    1.80
  -8  26 -20    0.70    1.50
   8 -26  20   -0.10    1.60
   8 -26  20    2.60    1.60
   8 -26  20    0.20    1.90
   8  26 -20    0.90    1.70
  -8  24 -18    2.40    1.60
  -8 -24  18    1.00    1.60
   8 -24  18    1.70    1.70
   8 -24  18    1.00    1.40
   8 -24  18    1.90    1.60
   8  24 -18   -0.70    1.50
  -8  22 -16    1.10    1.40
  -8 -22  16    0.50    1.60
   8 -22  16   -1.30    1.40
   8 -22  16    0.30    1.50
   8 -22  16   -0.20    1.20
   8  22 -16    1.70    1.40
  -8  20 -14    4.20    1.50
  -8 -20  14    3.10    1.50
   8 -20  14    3.20    1.40
   8 -20  14    2.90    1.60
   8  20 -14    2.50    1.40
   8 -20  14    4.90    1.70
  -8  18 -12    1.20    1.10
  -8 -18  12   -0.20    1.30
   8  18 -12   -0.80    1.00
   8 -18  12    1.50    1.30
   8 -18  12   -0.80    1.20
   8 -18  12    0.80    1.10
  -8 -16  10    0.50    1.20
  -8  16 -10    1.10    1.00
   8 -16  10    1.20    1.10
   8 -16  10    0.70    1.10
   8  16 -10    0.40    0.90
   8 -16  10    1.50    1.00
  -8  14  -8    2.70    1.00
  -8 -14   8    4.70    1.30
   8  14  -8    1.80    0.90
   8 -14   8    4.20    1.20
   8 -14   8    2.70    1.10
   8 -14   8    4.30    1.10
  -8 -12   6    3.80    1.10
  -8  12  -6    5.00    1.10
   8 -12   6    5.20    1.20
   8  12  -6    4.50    1.00
   8 -12   6    3.90    1.00
   8 -12   6    3.60    1.10
  -8 -10   4    1.10    0.80
  -8  10  -4    0.70    0.60
   8 -10   4    0.00    0.70
   8 -10   4    0.20    0.70
   8  10  -4    0.20    0.70
   8 -10   4   -0.80    0.60
  -8   8  -2   17.10    1.50
  -8  -8   2   17.80    1.70
   8  -8   2   15.30    1.50
   8  -8   2   17.40    1.40
   8  -8   2   19.40    1.60
   8   8  -2   17.30    1.50
  -8   6   0    0.70    0.50
  -8  -6   0    0.40    0.70
   8  -6   0    0.50    0.60
   8  -6   0    1.20    0.60
   8   6   0    1.30    0.70
  -8   4   2    0.70    0.60
  -8  -4  -2    0.10    0.60
   8   4   2    0.90    0.70
   8   4   2    0.90    0.30
   8  -4  -2    0.50    0.50
   8  -4  -2   -0.10    0.50
  -8  -2  -4    1.50    0.60
  -8   2   4    2.20    0.70
   8  -2  -4    1.10    0.50
   8   2   4    1.40    0.70
   8   2   4    2.40    0.70
   8  -2  -4    1.80    0.60
   8  -2  -4    1.40    0.60
  -8   0  -6    0.40    0.50
  -8   0   6    0.50    0.70
   8   0  -6    0.60    0.50
   8   0   6    0.00    0.30
   8   0   6    0.50    0.60
   8   0   6    1.00    0.60
   8   0   6    1.30    0.70
   8   0  -6    0.50    0.50
  -8   2  -8    6.30    0.80
  -8  -2   8    6.80    1.20
   8   2  -8    6.00    0.90
   8  -2   8    5.20    0.70
   8   2  -8    5.00    0.80
   8  -2   8    7.90    1.10
   8  -2   8    4.70    1.00
  -8   4 -10    1.70    0.50
  -8  -4  10    1.40    0.90
   8  -4  10    1.30    0.80
   8   4 -10    1.30    0.70
   8  -4  10    1.30    0.60
   8   4 -10    2.10    0.70
   8  -4  10    0.50    0.70
  -8   6 -12   46.30    1.90
  -8  -6  12   48.90    2.80
  -8   6 -12   47.50    2.60
   8   6 -12   49.10    2.30
   8  -6  12   44.00    2.60
   8  -6  12   50.09    2.40
   8   6 -12   48.70    2.50
   8  -6  12   47.90    2.70
  -8   8 -14    4.60    1.00
  -8  -8  14    5.40    1.30
   8  -8  14    5.70    1.20
   8  -8  14    7.30    1.30
   8   8 -14    5.60    1.10
   8  -8  14    6.50    1.10
   8   8 -14    7.10    1.10
  -8 -10  16    0.20    0.90
  -8  10 -16    0.20    0.80
   8  10 -16    0.70    0.80
   8 -10  16    1.30    1.00
   8 -10  16    0.30    0.80
   8 -10  16    0.20    0.80
  -8 -12  18    5.30    1.50
  -8  12 -18    3.20    1.20
   8  12 -18    2.80    1.00
   8 -12  18    4.80    1.30
   8 -12  18    6.40    1.40
   8 -12  18    3.50    1.30
  -8 -14  20    4.50    1.60
  -8  14 -20    4.70    1.40
   8 -14  20    3.30    1.50
   8 -14  20    5.50    1.40
   8  14 -20    4.00    1.40
   8 -14  20    6.90    1.70
  -8 -16  22    1.80    1.60
  -8  16 -22    2.80    1.30
   8 -16  22    2.60    1.40
   8  16 -22    3.00    1.40
   8 -16  22    1.70    1.50
   8 -16  22    5.70    1.70
  -8  18 -24   -0.50    1.30
  -8 -18  24    1.40    1.70
   8 -18  24   -0.30    1.60
   8  18 -24   -0.90    1.30
   8 -18  24    0.50    1.30
  -8 -20  26    3.40    2.10
  -8  20 -26    2.00    1.60
   8 -20  26   -0.10    1.30
   8  20 -26   -2.60    1.30
   8 -20  26    4.30    2.20
  -8  22 -28   -0.90    1.50
   8 -22  28    0.10    1.50
   8 -22  28    1.70    2.00
   8  22 -28   -0.40    1.50
  -9  25 -19    1.40    1.50
   9 -25  19    2.00    1.60
   9 -25  19    0.80    1.80
   9  25 -19    2.10    1.80
   9 -25  19    6.80    2.30
  -9  23 -17    9.10    2.10
  -9 -23  17    4.60    1.90
   9 -23  17   13.40    2.50
   9 -23  17    8.50    1.90
   9 -23  17   10.20    2.50
   9  23 -17    8.50    2.00
  -9  21 -15    0.20    1.20
  -9 -21  15   -0.40    1.50
   9  21 -15   -2.90    1.20
   9 -21  15   -1.00    1.40
   9 -21  15    2.90    1.60
   9 -21  15    0.30    1.30
  -9  19 -13    2.30    1.30
  -9 -19  13    6.00    1.80
   9 -19  13    4.60    1.50
   9 -19  13    2.70    1.40
   9  19 -13    0.40    1.20
   9 -19  13    2.40    1.30
  -9 -17  11    8.40    1.80
  -9  17 -11    5.80    1.40
   9 -17  11    5.50    1.60
   9 -17  11    7.80    1.70
   9  17 -11    5.50    1.40
   9 -17  11    5.50    1.40
  -9  15  -9   14.80    1.80
  -9 -15   9   10.70    1.80
   9 -15   9   14.30    1.80
   9 -15   9   15.10    1.90
   9 -15   9   12.70    1.90
   9  15  -9   15.00    1.80
  -9  13  -7   24.70    2.10
  -9 -13   7   22.20    2.20
   9  13  -7   22.70    2.00
   9 -13   7   18.30    2.00
   9 -13   7   24.80    2.00
   9 -13   7   23.90    2.30
  -9  11  -5   25.50    1.90
  -9 -11   5   30.70    2.20
   9  11  -5   27.60    2.00
   9 -11   5   31.80    2.00
   9 -11   5   29.70    2.10
   9 -11   5   30.10    2.10
  -9  -9   3    1.90    0.90
  -9   9  -3    2.00    0.70
   9  -9   3    2.60    0.80
   9  -9   3    2.60    0.90
   9   9  -3    2.40    0.80
   9  -9   3    3.40    0.80
  -9  -7   1  110.89    4.50
  -9   7  -1  110.09    3.90
   9   7  -1  108.69    4.30
   9  -7   1  105.19    4.30
   9  -7   1  113.59    4.20
   9   7  -1  107.39    3.80
   9  -7   1  110.49    4.20
  -9   5   1    5.40    0.80
  -9  -5  -1    6.30    1.10
   9   5   1    8.10    0.70
   9   5   1    9.20    1.20
   9  -5  -1    6.40    0.90
   9  -5  -1    7.20    1.00
  -9   3   3   32.20    1.90
  -9  -3  -3   34.00    1.90
   9  -3  -3   30.80    1.60
   9   3   3   29.30    1.90
   9   3   3   34.20    1.90
   9  -3  -3   33.40    1.70
   9   3   3   28.80    1.10
  -9   1   5    3.20    0.90
  -9  -1  -5    2.10    0.70
   9   1   5    2.80    0.40
   9  -1  -5    2.40    0.70
   9   1   5    2.00    0.80
   9   1   5    2.50    0.80
   9  -1  -5    2.90    0.70
  -9  -1   7  296.37   10.20
  -9   1  -7  306.17    9.80
   9   1  -7  303.37    9.80
   9  -1   7  303.77    9.40
   9  -1   7  317.07   10.10
   9  -1   7  307.87   10.10
   9   1  -7  313.27    9.90
  -9  -3   9    3.30    1.00
  -9   3  -9    3.40    0.70
   9  -3   9    3.90    1.00
   9  -3   9    2.10    0.80
   9   3  -9    4.00    0.80
   9   3  -9    3.60    0.80
   9  -3   9    2.80    0.60
  -9  -5  11    3.60    1.10
  -9   5 -11    4.80    0.70
   9   5 -11    4.80    0.90
   9  -5  11    3.80    1.00
   9  -5  11    4.40    1.00
   9  -5  11    4.80    0.90
   9   5 -11    5.10    0.90
  -9   7 -13   57.29    3.10
  -9  -7  13   65.39    3.50
   9  -7  13   64.19    3.20
   9   7 -13   69.99    3.20
   9  -7  13   58.59    3.20
   9   7 -13   64.09    2.90
   9  -7  13   64.29    3.00
  -9  -9  15    1.20    1.00
  -9   9 -15   -0.60    0.70
   9   9 -15    1.40    0.80
   9  -9  15    1.70    1.00
   9  -9  15    0.20    0.80
   9  -9  15    1.10    0.80
   9   9 -15    1.20    0.80
  -9  11 -17    0.10    0.90
  -9 -11  17   -1.50    0.90
   9 -11  17    0.20    0.90
   9 -11  17    0.10    1.00
   9  11 -17   -0.20    0.70
   9 -11  17   -0.40    0.90
   9  11 -17    0.20    0.80
  -9  13 -19    4.50    1.50
  -9 -13  19   10.40    2.00
   9  13 -19    2.90    1.20
   9 -13  19   12.30    1.90
   9 -13  19    4.80    1.60
   9 -13  19    9.00    1.70
  -9 -15  21   32.20    3.30
  -9  15 -21   35.80    3.00
   9 -15  21   28.00    3.00
   9 -15  21   29.70    3.00
   9 -15  21   27.90    3.00
   9  15 -21   32.60    2.70
  -9  17 -23    9.90    1.90
  -9 -17  23   13.10    2.50
   9 -17  23   11.30    2.20
   9  17 -23   11.10    2.00
   9 -17  23   13.70    2.60
  -9 -19  25    2.80    1.90
  -9  19 -25    6.30    1.90
   9  19 -25    6.30    2.00
   9 -19  25    3.10    1.60
   9 -19  25    3.80    2.00
  -9  21 -27    0.10    1.60
  -9 -21  27   -1.90    1.80
   9  21 -27    0.10    1.70
   9 -21  27    2.30    1.60
   9 -21  27   -1.20    1.80
 -10  26 -20   -1.70    1.40
  10 -26  20   -1.80    1.50
  10 -26  20    0.60    1.50
  10  26 -20   -0.80    1.70
  10 -26  20   -1.10    1.70
 -10  24 -18    4.80    1.80
 -10 -24  18    4.50    2.10
  10 -24  18    5.40    2.10
  10 -24  18    4.50    1.80
  10 -24  18    6.70    2.10
  10  24 -18    7.40    2.10
 -10  22 -16    1.50    1.40
 -10 -22  16    1.90    1.60
  10 -22  16    5.10    1.60
  10  22 -16    4.20    1.80
  10 -22  16    3.30    1.80
  10 -22  16    6.40    2.10
 -10 -20  14    0.00    1.40
 -10  20 -14   -0.10    1.20
  10 -20  14    2.60    1.40
  10  20 -14   -0.20    1.30
  10 -20  14    1.10    1.30
  10 -20  14    0.00    1.30
 -10 -18  12    2.70    1.60
 -10  18 -12    1.90    1.20
  10 -18  12    0.50    1.20
  10 -18  12    0.90    1.30
  10 -18  12    1.00    1.10
  10  18 -12    2.10    1.30
 -10  16 -10    4.50    1.30
 -10 -16  10    2.50    1.40
  10 -16  10    4.70    1.50
  10 -16  10    3.90    1.40
  10  16 -10    3.60    1.30
  10 -16  10    4.90    1.40
 -10  14  -8  211.58    8.10
 -10 -14   8  230.58    8.50
  10  14  -8  219.28    8.00
  10 -14   8  212.58    8.20
  10 -14   8  223.58    8.00
  10 -14   8  206.28    8.10
 -10 -12   6   18.70    2.10
 -10  12  -6   21.10    2.00
  10 -12   6   18.60    1.90
  10 -12   6   21.50    2.20
  10  12  -6   23.70    2.00
  10 -12   6   20.90    2.00
 -10  10  -4    7.40    1.20
 -10 -10   4    6.00    1.30
  10 -10   4    5.60    1.10
  10 -10   4    5.70    1.10
  10 -10   4    8.80    1.40
  10  10  -4    6.30    1.20
 -10   8  -2   -0.40    0.60
 -10   8  -2   -0.10    0.40
 -10  -8   2   -0.90    0.60
  10  -8   2   -0.40    0.50
  10   8  -2   -0.40    0.40
  10  -8   2   -1.10    0.60
  10   8  -2   -0.10    0.70
  10  -8   2    0.80    0.70
 -10   6   0   50.59    2.30
 -10  -6   0   49.99    2.70
  10   6   0   51.99    2.60
  10  -6   0   49.90    2.40
  10   6   0   48.50    2.00
  10  -6   0   51.49    2.40
 -10   4   2    0.90    0.70
 -10  -4  -2    1.20    0.70
  10   4   2    0.70    0.30
  10  -4  -2    0.50    0.60
  10   4   2    1.10    0.80
  10  -4  -2    1.00    0.60
 -10  -2  -4   24.60    1.80
 -10   2   4   27.30    1.80
  10  -2  -4   28.40    1.70
  10   2   4   23.50    1.90
  10   2   4   29.90    1.90
  10  -2  -4   26.70    1.60
  10  -2  -4   26.80    1.60
  10   2   4   27.30    1.10
 -10   0   6  153.88    5.80
 -10   0  -6  152.98    5.40
  10   0  -6  151.18    5.40
  10   0   6  153.58    4.90
  10   0   6  154.38    5.70
  10   0   6  158.98    5.70
  10   0   6  157.68    5.80
  10   0  -6  151.68    5.40
 -10   2  -8  168.78    5.80
 -10  -2   8  172.48    6.40
  10   2  -8  170.48    5.90
  10   2  -8  169.98    5.90
  10  -2   8  164.88    5.60
  10  -2   8  175.98    6.30
 -10   4 -10    6.30    0.80
 -10  -4  10    7.80    1.40
  10  -4  10    8.10    1.30
  10   4 -10    5.50    1.00
  10  -4  10    5.00    1.20
  10  -4  10    5.00    0.80
  10   4 -10    5.10    0.90
 -10   6 -12   23.60    1.30
 -10  -6  12   24.20    2.10
  10  -6  12   24.70    1.70
  10  -6  12   23.50    1.90
  10  -6  12   25.40    2.00
  10   6 -12   25.20    1.70
  10   6 -12   25.00    1.80
 -10   8 -14   17.00    1.90
 -10  -8  14   17.40    2.10
  10  -8  14   18.30    1.80
  10   8 -14   17.30    1.70
  10  -8  14   20.60    2.20
  10   8 -14   19.30    1.80
  10  -8  14   15.90    1.90
 -10 -10  16   20.50    2.40
 -10  10 -16   19.90    2.20
  10  10 -16   18.90    1.90
  10 -10  16   19.50    2.20
  10  10 -16   20.80    2.00
  10 -10  16   19.00    2.20
  10 -10  16   20.50    2.10
 -10  12 -18   -0.80    1.00
 -10 -12  18    0.60    1.30
  10 -12  18   -1.30    0.90
  10  12 -18   -0.80    0.90
  10  12 -18   -0.60    0.90
  10 -12  18    0.80    1.10
  10 -12  18    1.60    1.10
 -10 -14  20   45.80    3.50
 -10  14 -20   38.80    3.10
  10 -14  20   39.60    3.20
  10  14 -20   39.90    2.90
  10 -14  20   35.20    3.00
  10  14 -20   39.00    2.80
  10 -14  20   45.30    3.30
 -10  16 -22   10.60    2.10
 -10 -16  22   11.20    2.50
  10  16 -22   14.20    2.10
  10 -16  22   14.60    2.50
  10 -16  22   15.50    2.40
  10 -16  22   17.80    2.60
 -10 -18  24    1.50    1.80
 -10  18 -24   -0.40    1.20
  10 -18  24    2.20    1.90
  10 -18  24    0.30    1.40
  10  18 -24    0.80    1.50
 -10 -20  26    4.50    2.10
 -10  20 -26    5.60    1.90
  10  20 -26    2.90    1.80
  10 -20  26    7.20    2.40
  10 -20  26    1.20    1.60
 -10  22 -28   -1.50    1.50
 -10 -22  28    4.20    2.30
  10 -22  28   -0.90    1.40
  10  22 -28   -1.10    1.80
 -11  25 -19    7.90    2.10
 -11 -25  19    4.30    2.40
  11 -25  19    9.00    2.40
  11  25 -19    1.80    1.80
  11 -25  19    8.10    2.30
  11 -25  19    3.70    1.80
 -11 -23  17    4.20    2.20
 -11  23 -17    1.60    1.50
  11 -23  17    5.90    2.20
  11 -23  17   -1.30    1.50
  11 -23  17    0.20    1.30
  11  23 -17    2.50    1.90
 -11  21 -15    2.20    1.40
 -11 -21  15    0.30    1.50
  11 -21  15   -0.10    1.30
  11 -21  15    1.00    1.50
  11 -21  15    0.50    1.50
  11  21 -15    1.50    1.60
 -11 -19  13    2.20    1.70
 -11  19 -13    6.10    1.70
  11 -19  13    6.40    1.90
  11 -19  13    3.40    1.60
  11  19 -13    3.80    1.60
  11 -19  13    5.00    1.60
 -11 -17  11    1.60    1.40
 -11  17 -11    1.50    1.30
  11 -17  11    1.60    1.20
  11  17 -11    2.50    1.40
  11 -17  11    1.10    1.30
  11 -17  11    0.20    1.20
 -11  15  -9   18.60    2.10
 -11 -15   9   19.50    2.40
  11  15  -9   20.80    2.30
  11 -15   9   20.00    2.30
  11 -15   9   21.70    2.30
  11 -15   9   18.10    2.20
 -11  13  -7   29.10    2.40
 -11 -13   7   34.50    2.70
  11 -13   7   29.70    2.30
  11  13  -7   28.20    2.50
  11 -13   7   28.50    2.30
  11 -13   7   27.20    2.60
 -11  11  -5    1.00    0.80
 -11 -11   5    2.00    1.10
  11 -11   5    1.00    0.80
  11 -11   5    1.20    0.80
  11 -11   5    0.50    0.90
  11  11  -5    1.60    1.00
 -11   9  -3    5.80    1.10
 -11  -9   3    6.10    1.20
  11   9  -3    4.10    1.00
  11  -9   3    7.30    1.30
  11   9  -3    4.60    0.80
  11  -9   3    6.70    1.10
  11  -9   3    3.80    0.90
 -11  -7   1   12.00    1.50
 -11   7  -1    9.00    1.00
  11  -7   1   11.10    1.50
  11   7  -1   11.40    1.40
  11  -7   1    9.90    1.30
  11   7  -1   10.60    0.90
  11  -7   1   10.90    1.30
 -11   5   1    6.80    1.00
 -11  -5  -1    7.70    1.30
  11  -5  -1    6.10    0.90
  11   5   1   10.00    1.40
  11  -5  -1    5.60    1.00
  11   5   1    5.60    0.60
 -11   3   3    5.20    1.00
 -11  -3  -3    7.80    1.20
  11  -3  -3    6.80    0.90
  11   3   3    7.10    1.20
  11  -3  -3    6.30    1.00
  11   3   3    7.70    1.20
  11   3   3    5.50    0.50
 -11   1   5   30.80    2.00
 -11  -1  -5   27.90    1.80
  11  -1  -5   28.60    1.80
  11   1   5   26.40    1.20
  11  -1  -5   26.50    1.60
  11   1   5   28.80    1.90
  11   1   5   29.20    2.00
 -11   1  -7   69.29    3.00
 -11  -1   7   69.69    3.40
  11   1  -7   66.39    2.90
  11   1  -7   72.19    3.00
  11  -1   7   71.89    3.30
  11  -1   7   68.49    2.50
  11  -1   7   72.19    3.30
 -11   3  -9   12.90    1.10
 -11  -3   9   10.60    1.50
  11  -3   9   10.70    1.40
  11   3  -9   14.60    1.40
  11  -3   9   11.00    1.50
  11  -3   9   10.30    1.00
  11   3  -9   11.60    1.30
 -11  -5  11   13.30    1.70
 -11   5 -11   14.20    1.10
  11  -5  11   14.90    1.40
  11   5 -11   12.90    1.40
  11   5 -11   15.00    1.50
  11  -5  11   17.70    1.90
  11  -5  11   15.80    1.80
 -11  -7  13    2.40    1.10
  11   7 -13    0.80    0.70
  11  -7  13    1.10    0.70
  11  -7  13    0.70    0.90
  11   7 -13    0.70    0.70
  11  -7  13    0.60    0.90
 -11  -9  15   -0.50    1.00
 -11   9 -15    0.10    0.80
  11  -9  15    2.10    1.20
  11  -9  15   -0.20    0.70
  11   9 -15    0.30    0.70
  11  -9  15    0.30    1.00
  11   9 -15    0.70    0.80
 -11  11 -17    8.80    1.70
 -11 -11  17    7.50    1.70
  11 -11  17    9.30    1.80
  11  11 -17    8.20    1.40
  11  11 -17    8.60    1.50
  11 -11  17    8.80    1.60
  11 -11  17    8.30    1.70
 -11 -13  19    1.60    1.50
 -11  13 -19    2.10    1.30
  11 -13  19    4.00    1.40
  11 -13  19    2.90    1.50
  11 -13  19    3.80    1.40
  11  13 -19    3.30    1.30
  11  13 -19    1.80    1.10
 -11  15 -21   -0.90    1.10
 -11 -15  21    2.00    1.80
  11 -15  21    0.00    1.30
  11  15 -21    0.70    1.10
  11  15 -21   -0.40    1.30
  11 -15  21    1.40    1.50
  11 -15  21    0.60    1.20
 -11 -17  23   -0.10    1.70
 -11  17 -23    2.40    1.40
  11 -17  23    1.20    1.70
  11  17 -23   -1.10    1.30
  11  17 -23    2.00    1.30
  11 -17  23    4.40    1.60
  11 -17  23   -0.40    1.20
 -11  19 -25    1.10    1.50
 -11 -19  25    2.60    2.20
  11 -19  25    1.40    2.00
  11  19 -25    0.80    1.60
  11  19 -25   -1.80    1.10
  11 -19  25    1.30    1.60
 -11 -21  27    5.00    2.40
 -11  21 -27    0.50    1.50
  11  21 -27    6.70    2.10
  11  21 -27    3.40    1.80
  11 -21  27    6.00    3.90
  11 -21  27    2.30    1.80
 -12  24 -18    2.50    1.60
 -12 -24  18    0.30    1.90
  12 -24  18    2.10    1.60
  12  24 -18    4.10    2.10
  12 -24  18    0.00    1.80
  12 -24  18    2.70    1.90
 -12  22 -16    0.90    1.30
 -12 -22  16    0.90    1.90
  12 -22  16   -1.80    1.40
  12  22 -16   -2.10    1.50
  12 -22  16    1.00    1.40
  12 -22  16   -2.80    1.40
 -12  20 -14    0.90    1.30
 -12 -20  14   -0.80    1.40
  12 -20  14    0.10    1.50
  12 -20  14    0.50    1.30
  12  20 -14    1.10    1.60
  12 -20  14    2.00    1.60
 -12  18 -12   -0.50    1.00
 -12 -18  12   -0.60    1.40
  12  18 -12    2.80    1.60
  12 -18  12    1.10    1.40
  12 -18  12    1.50    1.40
  12 -18  12    0.70    1.30
 -12  16 -10    0.80    1.20
 -12 -16  10   -0.10    1.30
  12  16 -10    1.30    1.30
  12 -16  10    0.80    1.20
  12 -16  10   -0.80    1.00
  12 -16  10    2.30    1.40
 -12 -14   8    1.30    1.30
 -12  14  -8    0.20    1.00
  12 -14   8    2.00    1.20
  12 -14   8   -0.10    1.10
  12 -14   8    1.00    1.00
  12  14  -8    0.60    1.10
 -12  12  -6    3.40    1.10
 -12 -12   6    1.50    1.20
  12 -12   6    1.40    1.00
  12 -12   6    1.20    0.90
  12 -12   6    0.70    1.00
  12  12  -6    1.20    1.00
 -12  10  -4   45.80    2.70
 -12 -10   4   46.90    3.00
  12  10  -4   40.30    2.10
  12  10  -4   42.70    2.70
  12 -10   4   45.30    2.60
  12 -10   4   48.50    2.70
  12 -10   4   46.00    2.80
 -12  -8   2    6.40    1.30
  12  -8   2    8.50    1.40
  12   8  -2    6.80    0.90
  12   8  -2    5.40    1.10
  12  -8   2    5.30    1.10
  12  -8   2    7.30    1.10
 -12   6   0    0.90    0.60
 -12  -6   0    1.30    0.80
  12   6   0    1.70    0.90
  12  -6   0    1.40    0.70
  12   6   0    0.30    0.40
  12  -6   0    2.30    0.80
 -12   4   2    1.10    0.70
 -12  -4  -2    1.90    0.80
  12  -4  -2    1.40    0.70
  12   4   2    1.10    0.80
  12  -4  -2    0.70    0.50
  12   4   2    0.60    0.30
  12   4   2    0.00    0.70
 -12   2   4   93.59    4.00
 -12  -2  -4   90.69    3.80
  12   2   4   91.29    3.00
  12   2   4   89.39    4.00
  12  -2  -4   89.09    3.70
  12   2   4   91.29    4.00
  12  -2  -4   93.09    3.60
  12  -2  -4   89.09    3.70
 -12   0  -6    1.10    0.60
 -12   0   6    1.10    0.80
  12   0   6    0.60    0.80
  12   0   6    0.50    0.40
  12   0  -6    2.10    0.70
  12   0  -6    0.60    0.50
  12   0   6    1.50    0.80
 -12   2  -8   19.40    1.40
 -12  -2   8   16.60    1.80
  12  -2   8   18.10    1.20
  12   2  -8   20.40    1.60
  12  -2   8   20.60    2.00
  12  -2   8   23.30    2.10
  12   2  -8   17.30    1.40
 -12   4 -10    3.20    0.70
 -12  -4  10    4.40    1.20
  12  -4  10    3.80    1.00
  12  -4  10    4.90    0.80
  12  -4  10    4.40    1.20
  12   4 -10    4.80    1.00
  12   4 -10    5.60    1.00
 -12  -6  12   14.40    2.00
  12  -6  12   17.40    1.50
  12  -6  12   20.80    2.20
  12   6 -12   16.20    1.70
  12   6 -12   20.80    1.70
  12  -6  12   11.60    1.60
 -12   8 -14    1.50    1.00
 -12  -8  14    0.30    1.10
  12  -8  14    0.40    1.00
  12   8 -14    1.60    0.80
  12   8 -14    1.60    0.90
  12  -8  14    0.50    0.80
  12  -8  14    0.40    0.90
 -12  10 -16   20.10    2.30
 -12 -10  16   14.70    2.30
  12  10 -16   16.50    1.90
  12 -10  16   16.40    2.20
  12  10 -16   20.70    2.10
  12 -10  16   19.70    2.10
  12 -10  16   16.00    2.10
 -12  12 -18   32.10    2.80
 -12 -12  18   31.40    3.20
  12  12 -18   30.40    2.50
  12 -12  18   33.70    2.70
  12 -12  18   25.10    2.70
  12  12 -18   28.90    2.50
  12 -12  18   28.20    2.90
 -12 -14  20    1.30    1.60
 -12  14 -20    0.70    1.20
  12 -14  20    0.20    1.20
  12 -14  20   -0.50    1.40
  12 -14  20    1.80    1.30
  12  14 -20    0.80    1.30
  12  14 -20   -1.70    0.90
 -12  16 -22    1.60    1.40
 -12 -16  22    1.50    1.80
  12  16 -22   -0.80    1.30
  12 -16  22    1.80    1.40
  12 -16  22   -0.20    1.40
  12  16 -22    1.50    1.30
  12 -16  22    1.10    1.30
 -12  18 -24    2.40    1.50
 -12 -18  24    2.70    2.10
  12 -18  24    3.20    2.00
  12  18 -24    2.10    1.60
  12 -18  24    2.10    1.60
  12  18 -24    5.40    1.70
 -12 -20  26   -1.30    2.00
 -12  20 -26   -1.90    1.30
  12 -20  26    1.70    2.00
  12  20 -26   -1.40    1.60
  12  20 -26    0.00    1.40
  12 -20  26   -0.80    1.40
 -13 -23  17   -0.10    1.90
 -13  23 -17   -1.50    1.10
  13 -23  17   -0.80    1.60
  13 -23  17   -0.60    1.40
  13 -23  17    1.20    1.80
  13  23 -17    0.10    1.70
 -13 -21  15    0.10    1.50
 -13  21 -15    0.00    1.30
  13  21 -15   -2.80    1.40
  13 -21  15   -1.30    1.10
  13 -21  15    0.90    1.70
  13 -21  15   -1.00    1.50
 -13  19 -13   -0.70    1.10
 -13 -19  13    1.20    1.70
  13 -19  13   -0.20    1.30
  13  19 -13    0.80    1.50
  13 -19  13   -0.40    1.40
  13 -19  13    0.00    1.20
 -13 -17  11    0.70    1.40
 -13  17 -11    0.30    1.20
  13 -17  11    1.30    1.40
  13 -17  11    1.10    1.40
  13 -17  11    0.40    1.10
  13  17 -11    0.60    1.30
 -13  15  -9    1.00    1.20
 -13 -15   9    3.40    1.60
  13 -15   9    1.50    1.30
  13 -15   9    3.40    1.40
  13 -15   9    1.40    1.10
  13  15  -9    0.90    1.20
 -13 -13   7   38.10    3.10
 -13  13  -7   40.80    2.80
  13  13  -7   38.70    3.20
  13  13  -7   43.00    2.90
  13 -13   7   40.80    2.90
  13 -13   7   36.60    2.90
  13 -13   7   37.80    2.70
 -13 -11   5    4.50    1.40
 -13  11  -5    4.40    1.20
  13  11  -5    4.70    1.30
  13 -11   5    5.50    1.30
  13 -11   5    4.90    1.20
  13 -11   5    2.30    1.20
 -13  -9   3    2.60    1.10
 -13   9  -3    1.90    1.00
  13   9  -3    2.70    1.10
  13  -9   3    0.50    0.90
  13  -9   3    1.90    0.90
  13  -9   3    1.50    0.80
 -13  -7   1    0.60    0.90
 -13   7  -1    1.20    0.70
  13  -7   1    1.20    0.70
  13   7  -1    0.20    0.90
  13  -7   1    1.30    0.80
  13  -7   1    2.90    1.00
 -13  -5  -1   17.80    1.90
 -13   5   1   16.30    1.60
  13  -5  -1   17.60    1.70
  13  -5  -1   15.80    1.40
  13   5   1   19.70    2.00
 -13  -3  -3    8.10    1.30
 -13   3   3    7.80    1.20
  13   3   3    6.40    1.30
  13  -3  -3    6.00    1.00
  13   3   3    7.30    1.30
  13  -3  -3    7.40    1.10
 -13  -1  -5    6.30    1.10
 -13   1   5    6.00    1.20
  13   1   5    5.70    1.20
  13   1   5    4.50    1.00
  13  -1  -5    6.00    1.10
  13  -1  -5    4.50    0.80
  13  -1  -5    3.50    0.90
 -13  -1   7    5.60    1.20
 -13   1  -7    3.20    0.80
  13   1  -7    4.30    0.80
  13  -1   7    6.00    1.20
  13  -1   7    4.70    1.10
  13   1  -7    3.60    0.90
 -13  -3   9    4.60    1.30
 -13   3  -9    3.60    0.80
  13  -3   9    4.30    1.20
  13   3  -9    6.30    1.20
  13  -3   9    5.30    1.20
  13   3  -9    5.40    1.00
 -13  -5  11   23.80    2.50
  13  -5  11   25.00    2.10
  13  -5  11   26.60    2.20
  13   5 -11   24.90    1.90
  13   5 -11   24.20    1.80
 -13  -7  13   17.80    2.30
  13   7 -13   24.20    1.90
  13  -7  13   18.60    2.20
  13  -7  13   17.60    2.10
  13   7 -13   20.20    2.00
 -13  -9  15    1.20    1.30
 -13   9 -15   -0.90    0.90
  13   9 -15    0.40    0.80
  13  -9  15    1.20    1.00
  13  -9  15    0.30    1.10
  13  -9  15    1.20    1.10
  13   9 -15    1.30    1.00
 -13 -11  17    0.60    1.50
 -13  11 -17   -0.40    1.00
  13 -11  17    0.40    1.10
  13 -11  17    0.60    1.20
  13  11 -17    1.00    1.00
  13 -11  17    0.40    1.10
  13  11 -17    0.10    1.10
 -13 -13  19   14.30    2.50
 -13  13 -19   14.00    2.20
  13  13 -19   14.50    2.00
  13  13 -19   16.70    2.10
  13 -13  19   10.70    2.20
  13 -13  19   16.90    2.50
  13 -13  19   13.80    2.20
 -13 -15  21    6.20    2.10
 -13  15 -21    5.10    1.70
  13 -15  21    6.30    2.30
  13  15 -21    5.80    1.60
  13 -15  21    2.70    1.70
  13 -15  21    6.40    1.90
  13  15 -21    6.90    1.80
 -13 -17  23    4.50    2.20
 -13  17 -23    2.20    1.60
  13  17 -23    3.30    1.70
  13 -17  23    0.90    1.50
  13 -17  23    1.70    1.80
  13  17 -23    1.60    1.30
 -13  19 -25    2.10    1.50
 -13 -19  25    0.50    2.10
  13 -19  25   -0.20    1.60
  13  19 -25    4.00    2.00
  13  19 -25    2.50    1.50
  13 -19  25    2.70    1.70
 -14 -22  16   -3.10    1.60
 -14  22 -16   -0.20    1.40
  14 -22  16    0.80    1.70
  14 -22  16   -0.40    1.70
  14  22 -16   -0.60    1.80
  14 -22  16   -1.60    1.20
 -14  20 -14    9.40    2.00
 -14 -20  14    9.00    2.20
  14 -20  14    9.30    2.20
  14  20 -14    9.80    2.20
  14 -20  14    4.90    1.70
  14 -20  14    6.10    2.00
 -14  18 -12    0.90    1.20
 -14 -18  12    2.40    1.70
  14 -18  12    0.90    1.40
  14  18 -12    0.60    1.50
  14 -18  12   -0.50    1.40
  14 -18  12    1.70    1.30
 -14  16 -10   20.90    2.60
 -14 -16  10   20.50    2.90
  14 -16  10   19.70    2.60
  14  16 -10   24.90    2.70
  14 -16  10   20.80    2.50
  14 -16  10   21.90    2.80
 -14  14  -8   23.60    2.50
 -14 -14   8   22.10    2.80
  14 -14   8   14.40    2.10
  14 -14   8   17.90    2.30
  14 -14   8   14.70    2.10
  14  14  -8   19.60    2.30
 -14 -12   6    1.90    1.40
 -14  12  -6    4.50    1.30
  14 -12   6    3.10    1.30
  14 -12   6    3.80    1.20
  14  12  -6    4.20    1.40
  14 -12   6    4.30    1.30
 -14 -10   4    0.00    1.00
 -14  10  -4    0.30    0.90
  14 -10   4    1.90    1.00
  14 -10   4    1.50    1.00
  14 -10   4    1.10    1.10
  14  10  -4    0.40    1.00
 -14  -8   2    2.10    1.20
  14   8  -2    0.90    1.00
  14  -8   2    2.60    1.10
  14  -8   2    1.20    0.80
  14  -8   2    1.70    0.90
 -14  -6   0    4.60    1.20
 -14   6   0    3.00    0.90
  14  -6   0    4.80    1.10
  14  -6   0    5.10    1.00
  14   6   0    7.20    1.50
 -14  -4  -2    1.40    0.90
 -14   4   2    1.40    0.80
  14   4   2    1.60    0.90
  14  -4  -2    1.20    0.80
  14   4   2    1.30    0.90
  14  -4  -2    1.90    0.70
 -14   2   4    0.10    0.70
 -14  -2  -4    0.60    0.80
  14  -2  -4    0.50    0.70
  14   2   4    0.70    0.80
  14   2   4   -0.10    0.80
  14  -2  -4    0.00    0.50
 -14   0   6   63.39    3.40
 -14   0  -6   64.19    3.10
  14   0   6   61.89    3.30
  14   0   6   58.19    3.20
  14   0  -6   61.19    3.00
  14   0  -6   59.09    2.80
 -14   2  -8    2.90    0.80
 -14  -2   8    3.20    1.20
  14  -2   8    5.20    1.30
  14  -2   8    3.60    1.10
  14   2  -8    3.80    1.00
  14   2  -8    3.30    0.80
 -14  -4  10    7.20    1.60
  14   4 -10    7.90    1.20
  14   4 -10    9.50    1.40
  14  -4  10   10.30    1.70
  14  -4  10   10.10    1.70
 -14  -6  12   36.30    2.90
  14   6 -12   35.80    2.30
  14   6 -12   33.40    2.40
  14  -6  12   32.90    2.60
  14  -6  12   33.30    2.60
 -14   8 -14    7.10    1.50
 -14  -8  14    6.20    1.80
  14  -8  14    8.90    1.70
  14   8 -14    8.60    1.50
  14  -8  14    7.30    1.70
  14   8 -14    9.90    1.60
 -14  10 -16    3.30    1.40
 -14 -10  16    5.40    1.80
  14 -10  16    4.20    1.40
  14  10 -16    3.10    1.30
  14 -10  16    3.70    1.60
  14  10 -16    2.80    1.20
 -14  12 -18    0.60    1.30
 -14 -12  18    2.40    1.60
  14 -12  18   -1.60    1.20
  14  12 -18    1.30    1.20
  14 -12  18    2.30    1.50
  14  12 -18    0.70    1.00
 -14  14 -20    9.90    2.00
 -14 -14  20    7.40    2.20
  14  14 -20   11.40    1.90
  14 -14  20   10.10    2.20
  14 -14  20   11.00    2.10
  14  14 -20   12.50    2.10
 -14  16 -22    0.30    1.40
 -14 -16  22    5.40    2.10
  14  16 -22    2.60    1.40
  14  16 -22    6.00    1.80
  14 -16  22    7.30    2.10
  14 -16  22    7.80    2.00
 -14 -18  24    0.10    1.90
 -14  18 -24    1.50    1.50
  14  18 -24    2.90    1.90
  14 -18  24   -2.60    1.40
  14 -18  24    1.40    1.60
  14  18 -24    0.80    1.30
 -15 -23  17    1.50    1.90
 -15  23 -17    0.80    1.60
  15  23 -17    0.10    1.80
  15 -23  17    3.60    1.70
  15 -23  17    2.70    2.30
  15 -23  17   -1.80    1.70
 -15 -21  15   -3.80    1.60
 -15  21 -15    0.20    1.40
  15 -21  15   -0.80    1.50
  15 -21  15   -0.50    1.70
  15  21 -15    1.30    1.80
  15 -21  15    1.30    1.50
 -15 -19  13    1.70    1.70
 -15  19 -13    1.10    1.40
  15 -19  13    0.80    1.40
  15 -19  13   -0.40    1.50
  15  19 -13   -0.10    1.40
  15 -19  13    1.60    1.50
 -15 -17  11    6.70    2.20
 -15  17 -11    5.30    1.60
  15  17 -11    2.10    1.70
  15 -17  11    7.20    1.70
  15 -17  11    5.20    1.70
  15 -17  11    9.00    2.10
 -15 -15   9   -0.10    1.40
 -15  15  -9    1.60    1.20
  15 -15   9    0.10    1.30
  15 -15   9   -0.80    1.10
  15 -15   9   -0.60    1.10
  15  15  -9   -1.90    1.20
 -15  13  -7    1.90    1.20
 -15 -13   7    2.50    1.70
  15 -13   7    1.30    1.20
  15  13  -7    4.00    1.50
  15 -13   7    4.00    1.60
  15 -13   7    3.20    1.20
 -15 -11   5    5.10    1.70
 -15  11  -5    2.70    1.20
  15  11  -5    5.10    1.50
  15 -11   5    4.00    1.30
  15 -11   5    5.20    1.40
  15 -11   5    5.20    1.60
 -15   9  -3    0.30    0.90
 -15  -9   3   -1.10    1.10
  15  -9   3   -0.40    0.80
  15   9  -3    0.90    1.10
  15  -9   3    0.00    0.80
  15  -9   3    1.90    1.20
 -15  -7   1    9.30    1.70
  15  -7   1    6.50    1.50
  15   7  -1    7.60    1.50
  15  -7   1    5.90    1.30
  15  -7   1    5.00    1.10
 -15   5   1   59.49    3.30
 -15  -5  -1   73.69    3.90
  15   5   1   83.99    3.90
  15  -5  -1   66.39    3.20
  15  -5  -1   70.19    3.50
  15   5   1   77.09    3.80
 -15  -3  -3    2.10    1.00
 -15   3   3    0.90    0.80
  15   3   3    1.00    1.00
  15   3   3    1.40    0.90
  15  -3  -3    1.20    0.70
  15  -3  -3    2.00    0.90
 -15   1   5   20.60    2.20
 -15  -1  -5   26.80    2.10
  15  -1  -5   22.70    1.70
  15   1   5   24.20    2.40
  15  -1  -5   23.40    1.90
  15   1   5   22.50    2.40
  15  -1  -5   27.60    2.00
 -15   1  -7    0.60    0.70
 -15  -1   7    1.10    1.00
  15  -1   7    0.40    1.00
  15   1  -7    0.60    0.80
  15   1  -7    0.40    0.70
  15  -1   7    2.20    1.10
 -15  -3   9   22.50    2.50
 -15   3  -9   29.60    3.20
  15  -3   9   29.90    2.40
  15   3  -9   26.80    1.90
  15  -3   9   28.50    2.40
  15   3  -9   27.90    2.10
 -15  -5  11    3.70    1.50
  15  -5  11    3.20    1.30
  15   5 -11    3.50    1.00
  15  -5  11    2.90    1.20
  15   5 -11    3.80    1.20
 -15  -7  13   16.20    2.40
  15  -7  13   15.90    2.20
  15  -7  13   17.50    2.30
  15   7 -13   16.50    1.80
  15   7 -13   17.70    2.00
 -15   9 -15    9.30    1.90
 -15  -9  15    7.80    2.10
  15  -9  15    9.30    1.90
  15  -9  15   10.00    1.90
  15   9 -15   12.30    1.70
  15   9 -15   11.10    1.70
 -15  11 -17   10.50    2.00
 -15 -11  17    8.80    2.10
  15 -11  17    5.60    1.70
  15 -11  17    8.30    2.10
  15  11 -17   10.20    1.80
  15  11 -17    9.30    1.60
 -15  13 -19   16.10    2.40
 -15 -13  19   17.90    2.90
  15 -13  19   12.30    2.30
  15 -13  19   12.60    2.20
  15  13 -19   13.40    2.10
  15  13 -19   11.10    1.90
 -15  15 -21   12.20    2.30
 -15 -15  21   10.30    2.50
  15  15 -21    5.70    1.70
  15 -15  21    4.90    1.80
  15 -15  21    8.60    2.20
  15  15 -21    8.10    2.00
 -15 -17  23   -1.70    2.00
 -15  17 -23   -0.30    1.30
  15 -17  23    2.40    1.90
  15 -17  23    0.90    1.60
  15  17 -23   -1.70    1.00
 -15  19 -25    1.70    1.60
 -15 -19  25    3.30    2.20
  15 -19  25    3.00    1.90
  15  19 -25    0.00    1.40
 -16 -22  16    3.10    2.20
 -16  22 -16    0.80    1.50
  16  22 -16    2.80    1.90
  16 -22  16    1.20    2.40
  16 -22  16   -1.20    2.30
 -16  20 -14    1.40    1.50
 -16 -20  14    1.10    1.90
  16  20 -14   -2.10    1.60
  16 -20  14    0.90    1.70
  16 -20  14   -0.80    1.30
 -16 -18  12    1.10    1.70
 -16  18 -12   -0.70    1.20
  16 -18  12    0.10    1.90
  16  18 -12   -1.40    1.50
  16 -18  12   -1.40    1.50
  16 -18  12    1.90    1.50
 -16  16 -10    1.30    1.30
 -16 -16  10    0.00    1.50
  16  16 -10    1.30    1.50
  16 -16  10    5.90    1.60
  16 -16  10    2.20    1.40
  16 -16  10   -2.10    1.30
 -16 -14   8    3.90    1.90
 -16  14  -8    3.00    1.30
  16  14  -8    4.30    1.60
  16 -14   8    2.50    1.30
  16 -14   8    5.40    1.50
  16 -14   8    5.20    1.70
 -16 -12   6   -1.80    1.40
 -16  12  -6   -0.30    1.00
  16 -12   6    1.00    1.10
  16 -12   6   -0.70    0.90
  16 -12   6    1.00    1.20
  16  12  -6    2.30    1.40
 -16 -10   4    0.30    1.40
 -16  10  -4    0.10    1.10
  16  10  -4    2.90    1.50
  16 -10   4    0.20    1.00
  16 -10   4    1.90    1.30
  16 -10   4    0.90    1.00
 -16  -8   2    1.50    1.30
  16  -8   2    2.00    1.10
  16  -8   2    1.00    0.90
  16  -8   2    0.10    1.20
  16   8  -2    1.80    1.30
 -16  -6   0    1.00    1.10
  16   6   0    0.30    1.20
  16  -6   0    1.30    1.00
  16  -6   0    0.60    0.70
 -16   4   2    0.40    0.80
 -16  -4  -2   -0.50    0.90
  16   4   2   -0.20    0.80
  16  -4  -2   -1.70    0.60
  16  -4  -2   -0.10    0.60
  16   4   2   -0.10    1.00
 -16   2   4    6.50    1.40
 -16  -2  -4    7.70    1.40
  16   2   4    7.70    1.70
  16   2   4    6.80    1.40
  16  -2  -4    7.60    1.40
  16  -2  -4    8.20    1.20
 -16   0   6    2.70    1.30
 -16   0  -6    0.70    0.90
  16   0   6    2.10    1.10
  16   0  -6    1.60    0.90
  16   0   6    1.30    1.00
  16   0  -6    2.80    1.10
  16   0  -6    1.20    0.70
 -16   2  -8    1.60    0.90
 -16  -2   8    0.30    1.20
  16   2  -8    0.80    1.00
  16   2  -8    1.60    0.80
  16  -2   8    2.30    1.20
  16  -2   8    2.90    1.20
 -16  -4  10    2.80    1.40
  16   4 -10    0.40    0.90
  16  -4  10   -0.10    1.00
  16   4 -10    0.80    0.80
  16  -4  10   -0.10    1.10
 -16  -6  12    4.80    1.70
  16  -6  12    4.60    1.50
  16   6 -12    2.60    1.00
  16  -6  12    3.80    1.30
  16   6 -12    3.90    1.30
 -16  -8  14    0.50    1.50
  16  -8  14    1.30    1.10
  16   8 -14    0.70    1.10
  16   8 -14    1.00    0.90
  16  -8  14   -0.70    1.10
 -16 -10  16    1.20    1.70
 -16  10 -16    4.80    1.60
  16 -10  16    2.00    1.40
  16  10 -16    2.60    1.20
  16  10 -16    1.40    1.30
  16 -10  16    0.30    1.20
 -16 -12  18    1.70    1.80
 -16  12 -18    1.30    1.40
  16  12 -18    1.10    1.30
  16  12 -18    0.50    1.20
  16 -12  18    1.30    1.50
  16 -12  18    1.90    1.40
 -16  14 -20    0.20    1.30
 -16 -14  20   -0.10    1.60
  16 -14  20   -0.30    1.40
  16 -14  20   -1.50    1.30
 -16  16 -22    1.80    1.60
 -16 -16  22    3.50    2.20
  16 -16  22   -2.00    1.30
  16 -16  22    3.40    1.90
 -16 -18  24    1.90    2.10
 -16  18 -24    1.20    1.60
  16 -18  24    1.70    1.70
 -17  21 -15    2.40    1.60
 -17 -21  15   -1.60    1.70
  17  21 -15   -2.70    1.50
 -17 -19  13   -1.40    1.60
 -17  19 -13    3.00    1.60
  17 -19  13    0.40    1.40
  17  19 -13    2.90    1.90
  17 -19  13    3.00    1.90
 -17  17 -11    0.30    1.30
 -17 -17  11    1.60    1.70
  17 -17  11    2.20    1.70
  17  17 -11   -0.50    1.60
  17 -17  11    1.70    1.50
 -17  15  -9    0.10    1.30
 -17 -15   9    6.40    2.10
  17 -15   9    1.30    1.50
  17 -15   9    2.60    1.40
  17  15  -9    2.00    1.60
 -17  13  -7    0.20    1.20
 -17 -13   7    2.60    1.70
  17 -13   7    3.30    1.40
  17  13  -7    1.20    1.50
  17 -13   7    4.70    1.70
 -17  11  -5    0.40    1.10
 -17 -11   5   -0.80    1.40
  17  11  -5    2.80    1.50
  17 -11   5    2.70    1.20
  17 -11   5   -0.70    1.20
 -17  -9   3    5.30    1.80
  17  -9   3    7.70    1.50
  17   9  -3    4.90    1.70
  17  -9   3    7.50    1.80
 -17  -7   1    3.30    1.40
  17   7  -1    1.70    1.30
  17  -7   1    3.10    1.20
  17  -7   1    3.60    1.40
 -17  -5  -1   32.60    2.90
  17   5   1   33.80    2.70
  17   5   1   37.60    3.20
  17  -5  -1   33.80    2.60
 -17   3   3    5.30    1.40
 -17  -3  -3    6.90    1.50
  17   3   3    4.30    1.30
  17  -3  -3    4.70    1.30
  17   3   3    5.80    1.60
 -17   1   5   -1.30    0.90
 -17  -1  -5    0.80    0.90
  17  -1  -5    0.50    0.90
  17   1   5    0.60    1.10
 -17   1  -7    2.10    1.00
 -17  -1   7    3.10    1.40
  17  -1   7    1.60    1.20
  17  -1   7    1.10    1.10
  17   1  -7    2.90    1.10
  17   1  -7    2.70    1.20
 -17  -3   9    0.40    1.20
  17  -3   9    0.90    1.10
  17  -3   9   -0.30    1.00
  17   3  -9    0.40    0.90
 -17  -5  11   -1.50    1.30
  17   5 -11   -0.90    1.00
  17  -5  11   -0.40    1.00
  17  -5  11    0.60    1.10
 -17  -7  13    2.00    1.60
  17  -7  13    0.30    1.10
  17   7 -13    2.90    1.30
  17  -7  13    3.20    1.40
 -17   9 -15    6.90    1.80
 -17  -9  15    4.20    2.00
  17   9 -15    5.80    1.70
  17  -9  15    3.70    1.50
  17  -9  15    5.00    1.70
 -17  11 -17    2.60    1.40
 -17 -11  17    1.00    1.80
  17 -11  17   -0.10    1.40
  17 -11  17    1.50    1.50
 -17  13 -19    9.30    2.10
 -17 -13  19   12.00    2.60
  17 -13  19   10.30    2.30
  17 -13  19    8.90    2.20
 -17  15 -21    2.80    1.60
 -17 -15  21    7.10    2.40
  17 -15  21    1.90    1.70
  17 -15  21    1.00    1.50
 -17 -17  23    0.00    2.10
 -17  17 -23    2.10    1.60
  17 -17  23    3.60    1.90
 -18  20 -14   -1.10    1.30
 -18 -20  14    3.20    2.30
  18  20 -14    0.80    1.90
 -18 -18  12    0.20    1.80
 -18  18 -12    0.30    1.30
  18 -18  12    0.30    1.70
  18 -18  12   -1.30    1.50
  18  18 -12   -0.60    1.60
 -18  16 -10    7.40    1.90
 -18 -16  10    8.00    2.40
  18  16 -10    3.60    1.90
  18 -16  10   10.40    2.30
  18 -16  10    7.20    1.80
 -18 -14   8   -2.60    1.60
 -18  14  -8    1.10    1.30
  18  14  -8    1.80    1.50
  18 -14   8   -0.70    1.10
  18 -14   8   -0.90    1.40
 -18 -12   6    3.00    1.90
 -18  12  -6    1.80    1.30
  18 -12   6    1.60    1.30
  18 -12   6    2.20    1.50
  18  12  -6    1.10    1.60
 -18 -10   4    6.10    2.00
 -18  10  -4    7.80    1.70
  18  10  -4    6.50    1.80
  18 -10   4    8.20    2.00
  18 -10   4    6.10    1.50
 -18  -8   2   16.80    2.60
  18  -8   2   10.70    2.00
  18   8  -2   16.00    2.40
  18  -8   2    9.80    1.80
 -18  -6   0   20.10    2.70
  18   6   0   18.90    2.40
  18  -6   0   21.10    2.30
  18   6   0   22.30    2.70
  18  -6   0   16.90    2.30
 -18  -4  -2    2.40    1.30
  18   4   2    0.10    1.20
  18   4   2    1.40    1.10
  18  -4  -2    1.60    1.10
 -18  -2  -4    4.60    1.50
 -18   2   4    7.30    1.60
  18  -2  -4    5.80    1.50
  18   2   4    6.50    1.70
  18   2   4    3.80    1.40
 -18   0   6   20.00    2.40
 -18   0  -6   16.70    2.10
  18   0   6   17.50    2.30
  18   0  -6   19.40    2.20
  18   0   6   16.70    2.20
  18   0  -6   17.10    2.10
 -18  -2   8    1.40    1.30
  18   2  -8    0.10    1.00
  18  -2   8    0.30    1.00
  18  -2   8   -2.30    0.80
  18   2  -8    0.40    1.00
 -18  -4  10    0.20    1.30
  18  -4  10    0.10    1.10
  18  -4  10   -0.40    1.10
  18   4 -10    1.90    1.20
 -18  -6  12    1.50    1.70
  18  -6  12    0.90    1.30
  18  -6  12    1.90    1.30
  18   6 -12    4.70    2.30
 -18  -8  14    5.40    2.00
  18  -8  14    9.70    2.00
  18  -8  14   10.30    2.20
 -18 -10  16    4.80    2.20
 -18  10 -16   -1.20    1.20
  18 -10  16    0.10    1.20
  18 -10  16    1.60    1.30
 -18 -12  18    8.20    2.40
 -18  12 -18   10.40    2.20
  18 -12  18   10.20    2.30
  18 -12  18    8.70    2.00
 -18  14 -20   10.60    2.40
 -18 -14  20   10.00    2.60
  18 -14  20   13.60    2.70
  18 -14  20    6.60    2.00
 -18 -16  22    7.50    2.60
 -18  16 -22    6.60    2.10
  18 -16  22    3.10    1.80
 -19 -19  13   -1.90    1.80
 -19  19 -13   -0.60    1.40
  19  19 -13    1.30    1.90
 -19 -17  11   -3.40    1.50
 -19  17 -11    1.10    1.50
  19  17 -11    0.10    1.60
  19 -17  11   -0.40    1.50
 -19 -15   9    8.10    2.50
 -19  15  -9    6.00    1.80
  19 -15   9    4.80    1.70
  19 -15   9    6.20    2.10
  19  15  -9   13.50    2.50
 -19 -13   7    0.20    1.90
 -19  13  -7    1.60    1.40
  19 -13   7   -0.70    1.10
  19 -13   7    0.90    1.40
  19  13  -7    0.60    1.60
 -19  11  -5    0.40    1.10
 -19 -11   5   -1.10    1.70
  19 -11   5   -0.50    1.10
  19  11  -5    2.60    1.70
  19 -11   5    3.00    1.60
 -19  -9   3    2.90    1.90
  19  -9   3    0.80    1.50
  19  -9   3    1.60    1.30
  19   9  -3    2.00    1.60
 -19  -7   1   45.20    3.70
  19   7  -1   47.00    3.60
  19   7  -1   40.20    3.20
  19  -7   1   44.20    3.10
  19  -7   1   43.50    3.40
 -19  -5  -1    1.80    1.40
  19   5   1   -0.40    1.10
  19   5   1    1.30    1.50
  19  -5  -1   -0.90    0.90
 -19  -3  -3    0.60    1.20
 -19   3   3    1.40    1.20
  19   3   3    1.50    1.40
  19  -3  -3   -1.70    0.90
  19   3   3   -0.80    1.00
 -19  -1  -5    7.30    1.70
 -19   1   5    8.20    1.90
  19   1   5    8.30    1.90
  19   1   5    6.60    1.70
  19  -1  -5    6.40    1.60
 -19  -1   7   18.40    2.60
  19  -1   7   24.70    2.90
  19   1  -7   25.50    2.80
  19  -1   7   24.30    2.80
  19   1  -7   23.60    2.50
 -19  -3   9    0.20    1.40
  19  -3   9   -0.80    1.00
  19  -3   9    0.80    1.30
 -19  -5  11    0.30    1.50
  19  -5  11    1.30    1.20
  19  -5  11    0.90    1.20
 -19  -7  13   19.90    3.00
  19  -7  13   11.90    2.20
  19  -7  13   17.50    2.50
 -19   9 -15   -1.70    1.20
 -19  -9  15    1.40    1.90
  19  -9  15    0.30    1.50
  19  -9  15    2.60    1.50
 -19 -11  17    6.60    2.40
 -19  11 -17    9.40    2.20
  19 -11  17    7.20    2.00
  19 -11  17    5.40    1.90
 -19  13 -19    4.80    1.90
 -19 -13  19    8.70    2.60
  19 -13  19    8.30    2.10
  19 -13  19    6.90    2.10
 -19 -15  21    6.10    2.50
 -19  15 -21    7.40    2.20
  19 -15  21    9.40    2.30
 -20  16 -10   -2.00    1.30
 -20 -16  10   -0.50    2.00
  20  16 -10   -2.20    1.60
  20 -16  10    0.80    1.70
 -20  14  -8    2.20    1.50
 -20 -14   8    2.50    2.20
  20  14  -8    2.10    1.80
  20 -14   8    3.20    1.80
  20 -14   8    0.00    1.60
 -20 -12   6    4.50    2.20
 -20  12  -6    4.30    1.60
  20 -12   6    3.30    1.80
  20 -12   6    4.50    1.60
  20  12  -6    2.20    1.70
 -20 -10   4   -0.70    1.70
 -20  10  -4    2.70    1.40
  20 -10   4   -1.40    1.20
  20  10  -4   -1.70    1.40
  20 -10   4    1.10    1.20
 -20  -8   2   -1.30    1.30
  20   8  -2    0.20    1.50
  20   8  -2    0.50    1.20
  20  -8   2   -1.30    1.00
  20  -8   2    2.80    1.60
 -20  -6   0    3.40    1.60
  20   6   0    1.10    1.30
  20  -6   0    1.00    1.40
  20   6   0    3.70    1.80
  20  -6   0    1.20    1.20
 -20  -4  -2   27.00    3.10
  20   4   2   24.90    2.80
  20   4   2   32.10    3.40
  20  -4  -2   27.10    2.80
 -20  -2  -4    1.80    1.30
 -20   2   4    3.70    1.50
  20  -2  -4    4.80    1.50
  20   2   4    1.20    1.30
 -20   0   6    1.50    1.50
  20   0  -6   -0.30    1.10
  20   0   6   -0.90    1.10
  20   0   6    0.50    1.20
 -20  -2   8    0.10    1.50
  20  -2   8   -0.20    1.10
  20  -2   8    2.30    1.40
  20   2  -8   -0.40    1.10
 -20  -4  10    0.60    1.60
  20  -4  10    1.80    1.40
  20  -4  10    2.00    1.40
 -20  -6  12   -1.00    1.60
  20  -6  12    0.50    1.20
  20  -6  12   -0.60    1.10
 -20  -8  14    1.00    1.90
  20  -8  14   -1.20    1.10
  20  -8  14    1.10    1.40
 -20 -10  16   21.60    3.40
 -20  10 -16   10.00    2.30
  20 -10  16    8.90    2.10
  20 -10  16   10.40    2.20
 -20 -12  18    1.00    2.00
 -20  12 -18   -0.40    1.40
  20 -12  18   -0.10    1.50
  20 -12  18    0.80    1.70
 -21 -15   9    6.80    2.50
 -21  15  -9    7.80    2.10
  21  15  -9   10.00    2.50
  21 -15   9    6.40    2.70
 -21 -13   7    1.60    2.00
 -21  13  -7   -2.80    1.10
  21 -13   7    0.90    1.60
  21  13  -7   -0.20    1.70
 -21  11  -5    0.50    1.40
 -21 -11   5    0.70    2.10
  21 -11   5    3.00    1.70
  21 -11   5    1.20    1.30
  21  11  -5    2.00    1.80
 -21  -9   3   11.90    2.60
  21   9  -3   12.00    2.20
  21   9  -3   15.40    2.70
  21  -9   3    8.30    2.10
  21  -9   3   13.40    2.20
 -21  -7   1    4.40    1.90
  21  -7   1    2.60    1.70
  21   7  -1    2.70    1.50
  21  -7   1    5.60    1.70
  21   7  -1    7.40    2.10
 -21  -5  -1    1.30    1.70
  21   5   1    0.90    1.70
  21   5   1    1.60    1.30
  21  -5  -1    2.40    1.50
  21  -5  -1    2.60    1.30
 -21  -3  -3   12.30    2.30
  21  -3  -3   10.60    1.90
  21   3   3   11.50    2.20
 -21   1   5   13.50    2.30
  21  -1  -5   10.80    2.00
  21   1   5   12.00    2.20
  21   1   5    9.50    2.20
 -21  -1   7    5.40    1.80
  21  -1   7    3.90    1.70
  21  -1   7    2.80    1.60
  21   1  -7    1.70    1.30
 -21  -3   9    1.90    1.80
  21   3  -9    2.10    1.30
  21  -3   9    3.70    1.60
  21  -3   9    2.30    1.50
 -21  -5  11    3.40    2.00
  21  -5  11    5.90    1.80
  21  -5  11    3.00    1.50
 -21  -7  13    1.50    2.00
  21  -7  13   -0.30    1.20
  21  -7  13    0.50    1.30
 -21   9 -15   -0.50    1.40
 -21  -9  15    7.80    2.40
  21  -9  15    0.00    1.50
  21  -9  15    1.30    1.50
 -21 -11  17    7.90    2.70
 -21  11 -17    1.80    1.60
  21 -11  17    4.20    1.80
 -22 -14   8   19.80    3.50
  22  14  -8   16.20    2.90
 -22 -12   6    7.60    2.40
  22  12  -6    0.50    1.90
  22 -12   6    2.40    1.60
 -22 -10   4    1.70    2.10
  22  10  -4    2.00    1.90
  22 -10   4    0.90    1.60
  22  10  -4   -2.30    1.10
 -22  -8   2    1.30    1.80
  22  -8   2   -0.80    1.30
  22   8  -2   -0.50    1.20
  22  -8   2    2.70    1.40
  22   8  -2   -0.80    1.70
 -22  -6   0   15.00    2.80
  22  -6   0   15.60    2.60
  22  -6   0   13.20    2.20
  22   6   0   13.30    2.70
  22   6   0   13.10    2.30
 -22  -4  -2    1.60    1.70
  22   4   2    0.80    1.70
  22  -4  -2    1.90    1.50
  22   4   2    4.10    1.60
  22   2   4    0.10    1.30
  22  -2  -4   -0.60    1.20
  22   2   4    1.60    1.40
 -22   0   6    1.90    1.60
  22   0  -6    1.40    1.30
  22   0   6   -0.20    1.30
  22   0   6   -0.70    1.30
 -22  -2   8   24.80    3.40
  22   2  -8   16.00    2.40
  22  -2   8   17.10    2.70
  22  -2   8   15.80    2.60
 -22  -4  10    0.80    1.90
  22   4 -10    0.80    1.30
  22  -4  10   -0.70    1.30
  22  -4  10    3.10    1.50
 -22  -6  12    8.10    2.60
  22  -6  12    4.00    1.70
  22  -6  12    1.80    1.60
 -22  -8  14    6.20    2.50
  22  -8  14    3.50    1.70
  22  -8  14    3.10    1.80
 -22 -10  16    2.70    2.30
 -22  10 -16   -0.10    1.50
  22 -10  16    0.00    1.50
 -23 -11   5    4.50    2.20
  23  11  -5    1.00    1.40
  23  11  -5    2.70    2.20
 -23  -9   3    3.80    2.30
  23   9  -3    1.00    2.00
  23  -9   3    1.80    1.70
  23   9  -3    3.80    1.70
 -23  -7   1   12.30    2.60
  23  -7   1    4.80    1.90
  23   7  -1    8.10    2.40
  23   7  -1    9.30    2.10
 -23  -5  -1   -1.00    1.60
  23  -5  -1    0.40    1.40
  23  -5  -1   -2.20    1.10
  23   5   1   -0.60    1.30
  23   5   1    1.30    1.80
  23  -3  -3    0.40    1.30
  23   3   3    2.50    1.70
  23   3   3    3.80    1.70
  23   1   5   -1.00    1.30
  23   1   5    1.00    1.50
  23  -1  -5   -0.20    1.30
 -23  -1   7   11.20    2.50
  23  -1   7   10.90    2.30
  23   1  -7    7.50    1.90
  23  -1   7   11.80    2.50
 -23  -3   9    3.30    2.00
  23  -3   9   -0.80    1.30
  23  -3   9   -0.90    1.30
  23   3  -9    0.10    1.30
 -23  -5  11    0.60    2.10
  23   5 -11    2.30    1.60
  23  -5  11    3.50    1.80
  23  -5  11    1.20    1.40
 -23  -7  13    5.10    2.30
  23  -7  13   -0.20    1.40
 -24  -8   2    4.70    2.30
  24   8  -2   -2.40    1.90
  24   8  -2    2.10    1.50
 -24  -6   0   -0.50    1.80
  24   6   0   -1.10    1.70
  24   6   0   -0.70    1.30
  24  -4  -2   -4.10    1.20
  24   4   2   -0.30    1.40
  24  -4  -2    1.50    2.40
  24   2   4   -1.10    1.30
  24   2   4    0.40    1.40
  24  -2  -4    0.50    1.50
  24   0  -6   -0.20    1.40
  24   0   6    0.10    1.60
  24   0   6    1.20    1.50
 -24  -2   8    5.00    2.30
  24  -2   8    3.00    1.80
  24   2  -8   -0.10    1.40
  24  -2   8    1.60    1.60
 -24  -4  10    2.70    2.30
  24   4 -10   -0.40    1.40
  24  -4  10    2.80    1.70
   0  28 -20    8.90    2.10
   0 -26  18    3.50    1.60
   0 -26  18    2.90    2.00
   0  26 -18    1.60    1.50
   0 -24  16    2.20    1.50
   0  24 -16    0.20    1.30
   0 -24  16    2.00    1.80
   0 -22  14    4.20    1.70
   0  22 -14    3.50    1.40
   0 -22  14    4.20    1.40
   0 -20  12    7.60    1.50
   0 -20  12    7.10    1.70
   0  20 -12    4.40    1.30
   0  18 -10   -0.40    0.80
   0 -18  10    0.40    1.10
   0 -18  10    1.20    0.90
   0 -18  10    0.50    0.80
   0 -16   8   87.29    3.70
   0 -16   8   84.59    3.50
   0  16  -8   81.59    3.80
   0 -16   8   80.89    4.00
   0  14  -6   25.30    1.80
   0 -14   6   22.70    2.00
   0 -14   6   25.00    1.60
   0 -14   6   25.70    1.70
   0  12  -4   37.80    2.00
   0 -12   4   33.80    1.80
   0 -12   4   34.40    2.20
   0 -12   4   34.70    1.90
   0 -10   2    5.40    0.90
   0 -10   2    5.00    0.70
   0  10  -2    5.20    0.80
   0 -10   2    7.10    0.80
   0  -8   0 9652.93  288.97
   0   8   0 9767.52  289.77
   0  -8   0 9999.00  289.27
   0  -8   0 9963.80  289.97
   0  -6  -2  287.77    8.50
   0  -6  -2  285.37    8.70
   0  -6  -2  275.47    8.80
   0   6   2  289.57    8.70
   0  -4  -4    4.20    0.50
   0  -4  -4    4.80    0.50
   0   4   4    4.30    0.40
   0   2   6   10.70    0.60
   0   2   6   12.40    0.70
   0  -2  -6   13.00    0.80
   0   2   6   11.20    0.60
   0  -2  -6   12.80    0.70
   0   0   8 1181.58   34.80
   0   0  -8 1172.98   34.60
   0   0   8 1151.58   34.70
   0   0  -8 1192.58   34.80
   0   2 -10  106.69    3.60
   0  -2  10  107.19    3.70
   0  -2  10  101.49    3.70
   0  -4  12   -0.10    0.40
   0   4 -12    0.60    0.50
   0  -4  12    0.50    0.60
   0   6 -14    1.50    0.70
   0  -6  14    2.30    0.90
   0  -6  14    1.70    0.80
   0  -6  14    2.00    0.70
   0  -8  16   37.00    2.30
   0  -8  16   39.30    2.20
   0   8 -16   36.10    2.10
   0  -8  16   37.20    2.30
   0 -10  18    5.60    1.10
   0  10 -18    6.70    1.20
   0 -10  18    5.80    1.20
   0 -10  18    6.20    1.30
   0 -12  20   64.19    3.50
   0 -12  20   73.19    3.40
   0 -12  20   61.69    3.50
   0  12 -20   68.99    3.40
   0 -14  22   58.29    3.20
   0  14 -22   55.29    3.20
   0 -14  22   48.90    3.20
   0 -14  22   53.09    3.40
   0  16 -24   -1.40    1.00
   0 -16  24    1.30    1.40
   0 -18  26    0.50    1.60
   0  18 -26    0.90    1.40
   0  20 -28   -0.50    1.50
   0 -20  28   -0.20    1.50
   0 -22  30    0.50    2.00
   0  22 -30    3.80    2.00
  -1  27 -19    4.30    1.80
   1  27 -19    5.90    1.90
   1 -27  19    3.90    2.30
   1 -27  19    1.80    2.10
  -1  25 -17    0.00    1.20
  -1 -25  17   -0.10    1.40
  -1 -25  17    1.40    1.90
   1 -25  17    2.10    1.80
   1  25 -17    2.50    1.50
   1 -25  17   -0.50    1.30
  -1 -23  15    5.30    1.60
  -1  23 -15    3.80    1.50
  -1 -23  15    2.80    1.70
   1  23 -15    2.90    1.50
   1 -23  15    4.80    1.70
   1 -23  15    5.40    2.00
  -1 -21  13   -1.00    1.00
  -1  21 -13    1.40    1.10
  -1 -21  13    0.20    1.40
   1 -21  13   -0.10    1.10
   1 -21  13   -0.90    1.30
   1  21 -13    0.90    1.10
  -1  19 -11    3.60    1.20
  -1 -19  11    4.20    1.30
  -1 -19  11    4.30    1.60
  -1 -19  11    5.00    1.20
   1  19 -11    5.30    1.30
   1 -19  11    5.70    1.40
   1 -19  11    8.10    1.70
  -1 -17   9    0.00    0.70
  -1 -17   9    0.20    1.00
  -1  17  -9   -1.10    0.70
  -1 -17   9    0.40    0.80
   1 -17   9   -0.60    0.60
   1 -17   9    1.40    1.10
   1  17  -9   -0.20    0.70
   1 -17   9   -0.40    0.80
  -1 -15   7   26.10    2.10
  -1 -15   7   26.80    1.90
  -1 -15   7   22.90    1.80
  -1  15  -7   28.30    2.00
   1 -15   7   26.10    2.10
   1  15  -7   29.40    2.00
   1 -15   7   25.50    1.60
   1 -15   7   28.90    1.90
  -1 -13   5   33.50    2.00
  -1 -13   5   38.30    2.00
  -1 -13   5   31.30    2.20
  -1  13  -5   39.90    2.20
   1 -13   5   35.30    1.80
   1 -13   5   38.90    2.40
   1  13  -5   35.70    2.10
   1 -13   5   35.60    2.00
  -1 -11   3    1.10    0.60
  -1 -11   3    0.50    0.80
  -1  11  -3    1.10    0.70
  -1 -11   3    1.20    0.60
   1 -11   3    0.80    0.50
   1 -11   3    0.60    0.70
   1  11  -3    1.30    0.70
   1 -11   3   -0.20    0.70
  -1  -9   1   66.09    2.50
  -1  -9   1   67.89    2.80
  -1   9  -1   66.99    2.60
  -1  -9   1   63.49    2.60
   1  -9   1   66.89    2.50
   1   9  -1   72.59    2.70
   1  -9   1   69.79    2.80
   1  -9   1   65.69    2.40
  -1  -7  -1  459.65   13.80
  -1  -7  -1  441.46   13.80
  -1   7   1  455.45   13.70
  -1  -7  -1  457.45   13.50
   1  -7  -1  438.56   13.60
   1   7   1  458.65   13.80
   1  -7  -1  463.25   13.90
   1  -7  -1  453.55   13.60
  -1   5   3  115.89    3.70
  -1  -5  -3  122.19    3.90
  -1  -5  -3  122.19    3.90
   1  -5  -3  113.19    3.60
   1  -5  -3  117.19    3.90
   1   5   3  119.19    3.80
   1  -5  -3  114.19    3.80
  -1  -3  -5  115.39    3.70
  -1  -3  -5  115.29    3.60
   1  -3  -5  115.69    3.70
   1   3   5  110.39    3.60
   1   3   5  110.49    3.60
   1   3   5  111.29    3.40
  -1  -1  -7   59.59    2.20
  -1   1   7   59.99    2.00
  -1   1   7   59.99    2.20
  -1  -1  -7   61.09    2.10
   1   1   7   60.49    2.10
   1   1   7   61.09    2.10
   1  -1  -7   62.29    2.20
   1  -1  -7   58.39    2.00
  -1   1  -9   53.09    2.10
  -1  -1   9   55.49    2.20
  -1  -1   9   50.99    2.10
   1  -1   9   54.89    2.10
   1   1  -9   53.99    1.90
   1  -1   9   55.59    2.20
  -1   3 -11    0.30    0.40
  -1  -3  11   -0.40    0.40
  -1  -3  11   -0.30    0.40
  -1  -3  11   -0.40    0.50
   1  -3  11    0.50    0.40
   1  -3  11   -0.20    0.50
   1   3 -11    1.00    0.40
  -1   5 -13   42.90    2.00
  -1  -5  13   39.80    2.10
  -1  -5  13   40.80    2.20
  -1  -5  13   38.90    2.10
   1  -5  13   39.70    2.20
   1  -5  13   42.60    2.10
   1   5 -13   44.20    2.00
  -1  -7  15   22.70    1.80
  -1   7 -15   22.70    1.70
  -1  -7  15   26.70    1.90
  -1  -7  15   23.30    1.80
   1  -7  15   24.20    1.80
   1  -7  15   23.30    1.90
   1   7 -15   26.10    1.70
  -1  -9  17   92.49    4.00
  -1  -9  17   90.29    4.00
  -1   9 -17   95.69    4.00
  -1  -9  17   95.59    4.10
   1  -9  17   94.99    4.10
   1   9 -17   95.49    3.90
   1  -9  17   92.59    4.10
  -1  11 -19    0.20    0.70
  -1 -11  19    1.20    0.90
  -1 -11  19    0.60    0.90
  -1 -11  19    1.80    1.00
   1 -11  19   -0.40    0.80
   1  11 -19    0.50    0.80
   1 -11  19   -0.80    0.70
  -1  13 -21   26.00    2.20
  -1 -13  21   20.20    2.10
  -1 -13  21   20.70    2.40
   1 -13  21   20.40    2.40
   1 -13  21   23.50    2.40
   1  13 -21   20.50    2.10
  -1  15 -23   20.70    2.30
  -1 -15  23   19.20    2.40
  -1 -15  23   20.20    2.20
   1 -15  23   15.50    2.20
   1 -15  23   14.90    2.20
   1  15 -23   18.10    2.20
  -1  17 -25    0.70    1.30
  -1 -17  25    1.90    1.40
   1 -17  25   -0.50    1.10
   1 -17  25    0.10    1.40
   1  17 -25    1.50    1.30
  -1 -19  27    2.10    1.70
  -1  19 -27    3.20    1.70
   1 -19  27    1.10    1.60
   1  19 -27   -0.10    1.40
  -1 -21  29    0.30    1.80
  -1  21 -29   -1.70    1.50
   1  21 -29    1.30    1.70
   1 -21  29    2.40    1.80
  -1  23 -31    1.20    1.90
  -1 -23  31    5.00    2.10
   1 -23  31    5.60    2.20
   1  23 -31    2.00    2.00
  -2  28 -20    3.40    1.80
   2 -28  20    1.30    1.90
   2  28 -20   -2.00    1.60
  -2  26 -18    1.00    1.50
  -2 -26  18    0.70    2.10
   2  26 -18   -0.40    1.50
   2 -26  18   -2.50    1.60
   2 -26  18    1.20    1.50
  -2 -24  16    2.90    1.50
  -2  24 -16    4.20    1.60
  -2 -24  16    2.60    1.70
   2  24 -16    1.70    1.40
   2 -24  16    1.70    1.70
   2 -24  16    5.70    1.70
  -2 -22  14    7.10    2.00
  -2 -22  14    5.30    1.60
  -2  22 -14    5.40    1.60
   2 -22  14    6.60    1.90
   2 -22  14    6.30    1.70
   2  22 -14    4.30    1.50
  -2 -20  12    1.90    1.40
  -2 -20  12    3.40    1.20
  -2  20 -12    3.10    1.30
  -2 -20  12    0.00    1.10
   2  20 -12    1.80    1.10
   2 -20  12    3.60    1.50
   2 -20  12    2.20    1.20
  -2 -18  10   -0.10    0.90
  -2 -18  10    0.00    0.90
  -2  18 -10   -0.30    0.80
  -2 -18  10   -0.20    0.90
   2 -18  10    1.50    1.00
   2 -18  10    0.50    1.00
   2  18 -10    0.20    0.80
  -2 -16   8    0.20    0.70
  -2  16  -8    0.70    0.90
  -2 -16   8    2.20    1.00
  -2 -16   8    0.80    0.80
   2 -16   8    0.70    0.60
   2  16  -8    0.10    0.70
   2 -16   8   -0.50    0.70
   2 -16   8    3.30    1.20
  -2 -14   6    7.60    1.10
  -2 -14   6    6.10    1.30
  -2 -14   6    7.40    1.10
  -2  14  -6    5.90    1.10
   2 -14   6    7.20    1.10
   2 -14   6    7.00    0.80
   2 -14   6    8.80    1.40
   2  14  -6    7.70    1.20
   2 -14   6    6.60    1.10
  -2 -12   4    6.00    1.00
  -2 -12   4    4.80    0.90
  -2  12  -4    6.20    1.00
  -2 -12   4    5.10    1.10
   2 -12   4    5.50    1.00
   2 -12   4    7.10    1.20
   2  12  -4    4.90    0.90
   2 -12   4    7.30    1.10
   2 -12   4    5.30    0.70
  -2 -10   2    5.70    0.80
  -2 -10   2    6.50    0.80
  -2 -10   2    6.40    1.00
  -2  10  -2    4.40    0.80
   2 -10   2    6.60    0.80
   2  10  -2    5.90    0.90
   2 -10   2    5.30    0.60
   2 -10   2    5.10    0.80
   2 -10   2    6.90    1.00
  -2  -8   0   -0.10    0.50
  -2  -8   0    0.10    0.30
  -2   8   0    0.80    0.40
  -2  -8   0   -0.10    0.40
   2  -8   0    0.00    0.40
   2  -8   0    0.30    0.40
   2  -8   0    0.60    0.30
   2  -8   0   -0.30    0.50
   2   8   0    0.30    0.40
  -2  -6  -2  104.19    3.40
  -2  -6  -2  101.09    3.50
  -2   6   2  101.09    3.30
   2  -6  -2   95.99    3.30
   2  -6  -2  106.09    3.60
   2   6   2  102.49    3.50
   2  -6  -2  102.49    3.30
   2  -6  -2   98.29    3.20
  -2   4   4   92.69    3.00
  -2  -4  -4   98.39    3.30
  -2  -4  -4   98.09    3.10
   2  -4  -4   97.89    3.30
   2   4   4   99.99    3.30
  -2  -2  -6   26.90    1.20
  -2  -2  -6   26.30    1.00
   2   2   6   27.10    1.20
   2  -2  -6   26.00    1.20
   2   2   6   25.00    1.10
   2   2   6   25.00    1.20
  -2   0   8   -0.30    0.40
  -2   0  -8   -0.10    0.30
   2   0   8   -0.20    0.40
   2   0  -8   -0.50    0.30
   2   0  -8   -0.20    0.20
   2   0   8    0.00    0.40
  -2  -2  10    0.70    0.50
  -2  -2  10    0.10    0.50
  -2  -2  10    0.00    0.40
  -2   2 -10    0.40    0.40
   2   2 -10    0.80    0.30
   2   2 -10    0.70    0.40
   2  -2  10    0.70    0.50
   2  -2  10    0.50    0.50
  -2  -4  12   19.00    1.30
  -2  -4  12   18.30    1.40
  -2   4 -12   18.20    1.30
  -2  -4  12   17.10    1.40
   2  -4  12   15.90    1.30
   2   4 -12   19.50    1.10
   2  -4  12   18.20    1.30
  -2  -6  14   36.70    2.30
  -2  -6  14   41.50    2.20
  -2   6 -14   38.80    2.10
  -2  -6  14   40.10    2.30
   2  -6  14   34.80    2.20
   2  -6  14   39.30    2.10
   2   6 -14   36.30    1.90
  -2  -8  16    2.80    1.00
  -2  -8  16    0.30    0.80
  -2   8 -16    3.40    0.90
   2  -8  16    2.60    0.90
   2   8 -16    2.30    0.70
   2  -8  16    3.60    1.10
  -2 -10  18    5.10    1.20
  -2 -10  18    5.50    1.30
  -2  10 -18    5.10    1.10
   2 -10  18    7.60    1.40
   2  10 -18    6.40    1.10
   2 -10  18    3.40    1.00
  -2 -12  20   16.90    2.00
  -2 -12  20   19.40    2.10
  -2  12 -20   20.10    2.00
   2 -12  20   21.40    2.30
   2  12 -20   20.90    2.10
   2 -12  20   17.90    2.00
  -2  14 -22    7.90    1.50
  -2 -14  22    8.20    1.60
  -2 -14  22    6.70    1.70
   2 -14  22    7.60    1.60
   2  14 -22    7.50    1.50
   2 -14  22    8.70    1.80
  -2 -16  24    1.30    1.40
  -2 -16  24   -2.00    1.20
  -2  16 -24   -0.70    1.10
   2 -16  24   -1.20    1.20
   2 -16  24   -2.00    1.00
   2  16 -24   -1.40    1.00
  -2 -18  26    1.80    1.70
  -2  18 -26   -0.60    1.30
   2 -18  26   -2.00    1.30
   2 -18  26   -1.30    1.20
   2  18 -26    0.10    1.30
  -2  20 -28    1.10    1.60
  -2 -20  28    1.80    1.70
   2 -20  28   -0.80    1.60
   2  20 -28    0.30    1.50
  -2  22 -30    1.20    1.80
  -2 -22  30    4.50    2.10
   2 -22  30    0.60    1.80
   2  22 -30    3.10    1.80
  -3  27 -19    4.30    1.80
   3 -27  19    5.60    1.90
   3  27 -19    4.20    1.80
   3 -27  19    2.60    1.80
  -3 -25  17    0.90    1.50
  -3  25 -17    0.60    1.30
   3 -25  17    1.00    1.70
   3 -25  17    0.10    1.40
   3  25 -17   -2.90    1.30
  -3  23 -15   -0.10    1.20
  -3 -23  15    0.90    1.30
   3  23 -15    2.80    1.50
   3 -23  15    4.30    1.70
   3 -23  15    0.10    1.50
  -3 -21  13    0.10    1.10
  -3  21 -13    1.00    1.20
  -3 -21  13   -0.20    1.20
  -3 -21  13    0.80    1.40
   3 -21  13    2.10    1.20
   3  21 -13    1.10    1.20
   3 -21  13   -0.40    1.30
  -3  19 -11    1.10    1.00
  -3 -19  11    1.80    1.10
  -3 -19  11    1.60    1.10
  -3 -19  11    1.90    1.30
   3 -19  11    1.80    1.10
   3 -19  11    0.70    1.30
   3  19 -11    2.80    1.10
  -3 -17   9   -0.90    0.90
  -3 -17   9    1.00    0.90
  -3 -17   9    1.40    1.00
  -3  17  -9   -1.10    0.70
   3 -17   9    1.10    1.00
   3 -17   9    0.40    0.90
   3 -17   9    0.90    0.90
   3  17  -9    1.80    0.90
  -3 -15   7    1.90    0.90
  -3 -15   7    0.50    0.70
  -3  15  -7    0.40    0.70
  -3 -15   7    2.20    1.00
   3 -15   7    1.90    0.80
   3 -15   7    3.00    1.00
   3  15  -7    1.90    0.80
   3 -15   7    0.70    0.80
   3 -15   7    1.40    0.60
  -3 -13   5   -0.40    0.60
  -3  13  -5    1.30    0.70
  -3 -13   5   -0.20    0.80
  -3 -13   5    0.60    0.70
   3  13  -5    0.30    0.70
   3 -13   5    0.20    0.70
   3 -13   5   -0.40    0.40
   3 -13   5    0.20    0.70
   3 -13   5    0.10    0.70
  -3 -11   3    5.00    1.00
  -3 -11   3    3.40    1.00
  -3  11  -3    5.30    0.90
  -3 -11   3    8.50    1.00
   3 -11   3    6.20    0.60
   3 -11   3    7.00    1.00
   3 -11   3    5.40    0.90
   3 -11   3    6.90    1.20
   3  11  -3    5.70    1.00
  -3   9  -1   65.79    2.60
  -3  -9   1   64.39    2.70
  -3  -9   1   70.59    2.80
   3   9  -1   64.89    2.70
   3  -9   1   66.59    2.80
   3  -9   1   63.29    2.30
   3  -9   1   69.29    2.60
   3  -9   1   67.09    2.60
  -3  -7  -1   55.49    2.10
  -3   7   1   52.59    2.10
  -3  -7  -1   51.29    2.20
   3  -7  -1   50.09    2.00
   3  -7  -1   53.39    1.90
   3   7   1   52.99    2.20
   3  -7  -1   55.29    2.30
   3  -7  -1   54.89    2.10
  -3   5   3  107.19    3.30
  -3  -5  -3   99.79    3.30
  -3  -5  -3  101.39    3.60
   3  -5  -3  100.59    3.60
   3   5   3  106.09    3.60
   3  -5  -3  102.79    3.20
  -3  -3  -5    1.10    0.20
  -3  -3  -5    1.20    0.40
   3  -3  -5    1.20    0.40
   3   3   5    1.10    0.30
   3   3   5    2.10    0.50
   3   3   5    1.40    0.40
  -3   1   7  193.18    6.30
  -3  -1  -7  189.98    6.00
  -3  -1  -7  185.68    5.80
   3   1   7  190.58    6.10
   3  -1  -7  187.68    6.10
   3   1   7  193.58    6.00
   3   1   7  188.78    6.10
  -3   1  -9   34.10    1.50
  -3  -1   9   31.40    1.80
   3   1  -9   34.30    1.30
   3  -1   9   32.90    1.60
   3   1  -9   35.00    1.60
   3  -1   9   33.10    1.60
  -3   3 -11    1.20    0.50
  -3   3 -11    0.60    0.40
  -3  -3  11    0.50    0.60
   3   3 -11    0.30    0.40
   3  -3  11    0.30    0.50
   3  -3  11    0.00    0.50
   3   3 -11    0.70    0.40
  -3  -5  13   38.50    2.20
  -3  -5  13   37.70    2.10
  -3   5 -13   34.70    2.00
   3  -5  13   37.10    2.10
   3   5 -13   35.20    1.80
   3  -5  13   34.50    2.00
  -3  -7  15    3.80    1.10
  -3   7 -15    3.30    0.90
  -3  -7  15    4.30    1.10
   3  -7  15    3.60    0.90
   3   7 -15    2.90    0.80
   3  -7  15    3.20    1.00
  -3  -9  17   -0.10    0.80
  -3   9 -17    0.30    0.70
  -3  -9  17   -0.60    0.70
   3  -9  17    0.70    0.90
   3   9 -17    0.10    0.60
   3  -9  17    0.40    0.70
  -3 -11  19    8.10    1.50
  -3  11 -19    3.20    1.10
  -3 -11  19    6.30    1.40
   3  11 -19    7.00    1.20
   3 -11  19    7.70    1.40
   3 -11  19    3.30    1.20
  -3  13 -21   36.40    2.60
  -3 -13  21   40.10    2.90
  -3 -13  21   36.90    2.80
   3 -13  21   40.80    2.80
   3  13 -21   37.20    2.50
   3 -13  21   36.50    2.80
  -3  15 -23    6.10    1.60
  -3 -15  23    4.90    1.70
  -3 -15  23    5.00    1.60
   3 -15  23    3.20    1.50
   3  15 -23    6.20    1.50
   3 -15  23    6.00    1.60
  -3  17 -25    0.70    1.30
  -3 -17  25   -0.60    2.10
  -3 -17  25   -0.70    1.40
   3  17 -25    1.30    1.30
   3 -17  25    1.10    1.30
   3 -17  25   -0.20    1.30
  -3  19 -27   -0.60    1.40
  -3 -19  27   -0.50    1.40
   3 -19  27    0.70    1.40
   3  19 -27    1.30    1.50
   3 -19  27   -0.10    1.50
  -3  21 -29    1.20    1.70
  -3 -21  29    3.60    2.00
   3 -21  29    4.20    2.10
   3  21 -29    0.70    1.50
  -3  23 -31    1.50    1.90
  -3 -23  31    5.60    2.30
   3  23 -31    2.70    1.90
   3 -23  31    1.30    2.70
  -4  28 -20    0.40    1.60
   4 -28  20    5.00    2.40
   4  28 -20    3.70    2.00
   4 -28  20    3.50    2.20
  -4  26 -18   -1.30    1.40
   4 -26  18    0.40    1.50
   4  26 -18   -0.10    1.50
   4 -26  18   -0.70    1.60
  -4  24 -16    0.00    1.20
   4 -24  16    2.10    1.80
   4  24 -16    0.90    1.40
   4 -24  16    0.30    1.50
  -4 -22  14    4.60    2.30
  -4 -22  14    4.10    1.60
  -4  22 -14    0.20    1.30
   4 -22  14    2.10    1.70
   4  22 -14    2.10    1.40
   4 -22  14    5.00    1.60
  -4 -20  12    7.20    1.60
  -4  20 -12    6.20    1.40
  -4 -20  12    4.60    1.50
  -4 -20  12    6.80    1.80
   4  20 -12    8.10    1.60
   4 -20  12    7.30    1.60
   4 -20  12    7.00    1.60
   4 -20  12    4.80    1.70
  -4 -18  10    5.40    1.30
  -4 -18  10    3.60    1.30
  -4  18 -10    2.30    1.00
  -4 -18  10    4.00    1.30
   4  18 -10    4.20    1.20
   4 -18  10    7.50    1.40
   4 -18  10    6.20    1.40
   4 -18  10    3.90    1.40
  -4 -16   8    6.50    1.30
  -4 -16   8    5.00    1.30
  -4 -16   8    5.50    1.10
  -4  16  -8    5.40    1.10
   4  16  -8    5.00    1.10
   4 -16   8    3.10    1.20
   4 -16   8    4.80    1.20
   4 -16   8    3.50    1.00
  -4 -14   6    1.90    0.80
  -4  14  -6    1.20    0.70
  -4 -14   6    0.10    0.80
   4 -14   6    1.10    0.70
   4 -14   6    1.20    0.90
   4 -14   6    0.30    0.70
   4  14  -6    0.90    0.80
   4 -14   6    0.30    0.40
  -4  12  -4   13.20    1.40
  -4 -12   4   12.10    1.40
  -4 -12   4   15.10    1.60
   4 -12   4   16.10    1.50
   4 -12   4   16.60    1.70
   4 -12   4   11.10    1.20
   4 -12   4   11.20    0.80
   4  12  -4   14.80    1.50
  -4  10  -2  131.59    4.70
  -4 -10   2  130.29    4.70
  -4 -10   2  127.69    4.70
   4 -10   2  133.79    4.90
   4  10  -2  129.99    4.70
   4 -10   2  137.79    4.60
   4 -10   2  121.79    4.10
   4 -10   2  123.09    4.60
  -4  -8   0    0.50    0.50
  -4   8   0    0.50    0.40
  -4  -8   0    0.20    0.50
   4  -8   0    0.20    0.50
   4  -8   0    0.10    0.30
   4  -8   0    0.50    0.50
   4  -8   0   -0.20    0.40
   4   8   0    0.50    0.50
  -4  -6  -2   -0.10    0.40
  -4   6   2    0.10    0.30
  -4  -6  -2    1.00    0.40
   4  -6  -2    0.40    0.40
   4   6   2   -0.40    0.40
   4  -6  -2    0.00    0.30
  -4  -4  -4    0.10    0.20
  -4   4   4    0.20    0.20
  -4  -4  -4    0.50    0.40
   4  -4  -4    0.20    0.20
   4   4   4    0.40    0.40
   4  -4  -4    0.00    0.30
  -4  -2  -6    2.00    0.50
  -4   2   6    1.90    0.60
   4  -2  -6    2.50    0.30
   4   2   6    2.60    0.50
   4   2   6    2.90    0.50
   4   2   6    3.50    0.60
   4  -2  -6    3.30    0.50
  -4   0  -8   62.59    2.30
  -4   0   8   63.19    2.70
   4   0   8   61.39    2.50
   4   0   8   59.19    2.40
   4   0  -8   60.19    2.10
   4   0  -8   64.39    2.50
  -4  -2  10    2.30    0.70
  -4   2 -10    2.80    0.50
   4   2 -10    2.60    0.40
   4  -2  10    1.80    0.60
   4   2 -10    2.10    0.50
   4  -2  10    2.80    0.70
  -4   4 -12    1.20    0.70
  -4  -4  12    1.10    0.80
  -4   4 -12    1.50    0.50
   4   4 -12    1.00    0.60
   4  -4  12    1.30    0.80
   4   4 -12    0.70    0.50
   4  -4  12    1.50    0.70
  -4   6 -14   18.40    1.60
  -4   6 -14   18.70    1.20
  -4  -6  14   20.70    1.90
   4   6 -14   22.10    1.40
   4  -6  14   19.20    1.80
   4  -6  14   19.20    1.70
  -4  -8  16    9.00    1.30
  -4  -8  16    5.50    1.20
  -4   8 -16    7.10    1.10
   4  -8  16    6.80    1.30
   4   8 -16    8.30    1.10
   4  -8  16    8.00    1.30
  -4 -10  18   14.50    1.80
  -4 -10  18   17.50    2.00
  -4  10 -18   14.20    1.70
   4 -10  18   12.90    1.70
   4 -10  18   17.00    1.80
   4  10 -18   12.80    1.50
  -4 -12  20    2.20    1.20
  -4  12 -20    2.60    1.00
  -4 -12  20    0.40    1.10
   4 -12  20    2.30    1.10
   4  12 -20    3.00    1.10
   4 -12  20    2.70    1.10
  -4  14 -22   39.70    2.90
  -4 -14  22   36.40    2.90
  -4 -14  22   33.80    3.10
   4 -14  22   32.80    2.80
   4  14 -22   38.90    2.70
   4 -14  22   32.90    2.90
  -4  16 -24    3.80    1.50
  -4 -16  24    3.90    1.60
  -4 -16  24    7.30    1.90
   4 -16  24    3.20    1.40
   4 -16  24    1.90    1.50
   4  16 -24    9.00    1.70
  -4  18 -26    0.20    1.40
  -4 -18  26   -0.40    1.50
   4 -18  26    0.10    1.40
   4 -18  26    1.80    1.40
   4  18 -26    0.80    1.40
  -4  20 -28    0.00    1.60
  -4 -20  28    1.70    1.80
   4 -20  28   -1.10    1.60
   4  20 -28    1.30    1.60
   4 -20  28    0.60    1.40
  -4  22 -30   20.10    3.00
   4  22 -30   12.90    2.50
   4 -22  30   15.90    2.90
   4 -22  30   12.90    2.50
  -5  27 -19    0.10    1.50
   5 -27  19    0.40    1.80
   5  27 -19    1.10    1.80
   5 -27  19    1.60    1.70
  -5  25 -17   -1.50    1.20
   5 -25  17   -0.40    1.50
   5  25 -17    0.80    1.50
   5 -25  17    0.60    1.60
  -5  23 -15    0.20    1.30
   5  23 -15   -0.50    1.30
   5 -23  15    1.10    1.40
   5 -23  15    2.30    1.60
  -5  21 -13   15.20    2.00
  -5 -21  13   15.90    2.20
   5 -21  13   13.00    2.00
   5 -21  13   13.60    2.00
   5 -21  13   16.80    2.40
   5  21 -13   12.90    1.90
  -5 -19  11   -1.00    1.00
  -5  19 -11    0.00    0.90
   5  19 -11   -1.00    0.90
   5 -19  11   -0.30    1.00
   5 -19  11    0.60    1.00
   5 -19  11   -0.50    1.00
  -5  17  -9    2.50    1.00
  -5 -17   9    2.20    1.10
  -5 -17   9    1.60    1.10
   5 -17   9    1.30    1.10
   5 -17   9    1.70    1.00
   5  17  -9    2.90    1.10
   5 -17   9    2.80    1.30
  -5 -15   7    8.60    1.40
  -5 -15   7    8.90    1.40
  -5  15  -7   10.80    1.40
   5  15  -7    9.20    1.30
   5 -15   7    7.70    1.20
   5 -15   7    9.20    1.40
   5 -15   7    9.50    1.60
  -5 -13   5   28.40    2.00
  -5 -13   5   25.50    2.00
  -5  13  -5   27.10    1.90
   5 -13   5   28.80    1.90
   5 -13   5   26.70    1.80
   5 -13   5   27.10    2.10
   5  13  -5   29.50    1.90
  -5  11  -3    1.70    0.70
  -5 -11   3   -0.20    0.70
  -5 -11   3    0.20    0.70
   5 -11   3   -0.10    0.70
   5  11  -3    1.90    0.80
   5 -11   3    0.60    0.80
   5 -11   3    0.50    0.30
   5 -11   3    1.30    0.70
  -5  -9   1    9.80    1.10
  -5   9  -1    8.90    1.00
  -5  -9   1    9.50    1.20
   5   9  -1   11.30    1.20
   5  -9   1    8.30    0.60
   5  -9   1    9.10    1.10
   5  -9   1    8.50    1.10
   5  -9   1   11.00    1.00
  -5  -7  -1   22.00    1.40
  -5   7   1   21.60    1.20
  -5  -7  -1   21.00    1.20
   5  -7  -1   20.60    1.10
   5  -7  -1   21.20    1.30
   5   7   1   21.90    1.40
   5  -7  -1   20.70    1.30
  -5  -5  -3   16.90    1.20
  -5   5   3   17.50    1.00
  -5  -5  -3   17.40    0.90
   5  -5  -3   18.70    0.90
   5   5   3   19.90    1.20
   5  -5  -3   17.20    1.10
  -5   3   5    8.80    0.90
  -5  -3  -5    8.80    0.90
   5   3   5    9.60    0.90
   5   3   5    7.80    0.80
   5  -3  -5    7.50    0.80
  -5  -1  -7   48.10    2.00
  -5   1   7   48.80    2.30
   5  -1  -7   46.50    1.70
   5   1   7   50.59    2.00
   5  -1  -7   50.59    2.10
   5   1   7   47.10    2.10
  -5   1  -9  147.69    4.90
  -5  -1   9  151.08    5.40
   5  -1   9  145.99    5.20
   5   1  -9  155.98    5.20
   5   1  -9  151.78    4.80
   5  -1   9  156.28    5.20
  -5  -3  11   32.60    2.00
  -5   3 -11   28.80    1.40
   5  -3  11   31.60    1.80
   5   3 -11   29.60    1.40
   5   3 -11   29.60    1.70
   5  -3  11   32.50    1.80
  -5   5 -13   39.60    2.20
  -5  -5  13   38.90    2.40
  -5   5 -13   35.60    1.60
   5  -5  13   40.40    2.30
   5   5 -13   39.00    1.90
   5   5 -13   38.10    2.10
   5  -5  13   36.70    2.10
  -5   7 -15   33.50    1.60
  -5   7 -15   36.00    2.20
  -5  -7  15   31.80    2.30
   5  -7  15   34.50    2.20
   5   7 -15   35.30    1.90
   5  -7  15   34.40    2.20
  -5  -9  17   -1.50    0.70
  -5   9 -17    0.00    0.70
  -5   9 -17    0.10    0.40
   5  -9  17   -0.10    0.70
   5  -9  17   -0.30    0.80
   5   9 -17    0.30    0.60
  -5 -11  19    7.90    1.50
  -5  11 -19    7.20    1.40
   5 -11  19    6.40    1.50
   5 -11  19    3.30    1.20
   5  11 -19    4.10    1.10
  -5 -13  21   32.60    2.80
  -5  13 -21   32.30    2.60
   5 -13  21   35.10    2.80
   5  13 -21   37.50    2.50
   5 -13  21   31.00    3.00
  -5 -15  23   11.50    2.10
  -5  15 -23    9.50    1.90
   5 -15  23   13.20    2.20
   5 -15  23   11.30    1.90
   5  15 -23   12.20    1.80
  -5  17 -25   -1.40    1.20
  -5 -17  25    3.80    1.70
   5 -17  25    0.40    1.50
   5 -17  25    2.20    1.40
   5  17 -25   -1.10    1.10
  -5  19 -27   17.10    2.60
   5 -19  27    9.70    2.50
   5 -19  27   11.30    2.20
   5  19 -27   11.50    2.10
  -5  21 -29    3.90    1.90
   5 -21  29    6.40    2.30
   5  21 -29    4.60    1.90
   5 -21  29    1.20    1.50
  -5  23 -31    1.70    2.00
   5 -23  31    2.80    1.80
  -6  28 -20   -0.50    1.50
   6  28 -20   -1.90    1.70
   6 -28  20   -3.60    1.50
   6 -28  20    0.00    1.80
  -6  26 -18   -0.30    1.50
   6 -26  18    0.80    1.70
   6 -26  18   -0.20    1.70
   6  26 -18    1.50    1.70
  -6  24 -16   -1.40    1.20
   6 -24  16    0.90    1.60
   6 -24  16   -1.10    1.10
   6 -24  16   -2.00    1.30
   6  24 -16    0.90    1.40
  -6  22 -14    3.80    1.50
  -6 -22  14    6.10    1.70
   6  22 -14    2.60    1.50
   6 -22  14    3.40    1.60
   6 -22  14    6.30    2.00
   6 -22  14    2.70    1.40
  -6  20 -12    5.00    1.50
  -6 -20  12    4.70    1.60
   6 -20  12    4.50    1.40
   6 -20  12    4.70    1.60
   6 -20  12    1.70    1.30
   6  20 -12    4.20    1.40
  -6 -18  10    9.00    1.80
  -6  18 -10    6.90    1.40
   6 -18  10    5.30    1.50
   6 -18  10    8.50    1.50
   6  18 -10    6.60    1.40
   6 -18  10    8.40    1.60
  -6  16  -8    0.70    0.90
  -6 -16   8    1.40    1.00
   6 -16   8    2.40    1.10
   6 -16   8    0.60    1.00
   6  16  -8   -0.10    0.80
   6 -16   8    0.00    0.80
  -6  14  -6   50.09    2.70
  -6 -14   6   51.49    2.90
  -6 -14   6   46.60    2.70
   6 -14   6   48.90    2.60
   6 -14   6   50.39    2.70
   6  14  -6   47.00    2.60
   6 -14   6   48.20    2.90
  -6 -12   4   43.30    2.40
  -6 -12   4   46.30    2.50
  -6  12  -4   44.20    2.40
   6  12  -4   45.20    2.40
   6 -12   4   44.10    2.40
   6 -12   4   42.80    2.30
   6 -12   4   40.40    2.50
  -6  10  -2    2.40    0.80
  -6 -10   2    3.10    0.90
  -6 -10   2    3.20    0.80
   6 -10   2    2.00    0.30
   6 -10   2    2.80    0.90
   6 -10   2    2.20    0.80
   6  10  -2    2.40    0.80
   6 -10   2    2.50    0.70
  -6  -8   0    0.20    0.50
  -6  -8   0   -0.20    0.70
  -6   8   0    0.40    0.50
   6   8   0    0.30    0.60
   6  -8   0   -0.30    0.50
   6  -8   0    0.50    0.60
   6  -8   0    0.10    0.60
  -6  -6  -2   20.20    1.40
  -6   6   2   19.60    1.10
   6  -6  -2   19.10    1.10
   6  -6  -2   20.00    1.30
   6   6   2   18.10    1.30
  -6   4   4   92.19    3.50
  -6  -4  -4   95.29    3.60
   6  -4  -4  100.09    3.50
   6   4   4   94.79    3.60
   6  -4  -4   96.09    3.20
  -6   2   6   17.90    1.40
  -6  -2  -6   17.90    1.20
   6   2   6   17.60    1.10
   6  -2  -6   17.90    1.10
   6  -2  -6   17.90    0.90
   6   2   6   20.10    1.30
   6   2   6   20.60    1.30
  -6   0  -8    4.90    0.60
  -6   0   8    5.20    0.90
   6   0  -8    3.70    0.50
   6   0   8    4.50    0.70
   6   0   8    3.60    0.70
   6   0  -8    1.20    0.50
  -6   2 -10   22.90    1.20
  -6  -2  10   25.10    1.80
   6   2 -10   23.40    1.50
   6  -2  10   23.10    1.50
   6  -2  10   24.90    1.60
   6   2 -10   22.70    1.20
  -6   4 -12   31.10    1.50
  -6  -4  12   38.20    2.30
   6   4 -12   31.00    1.90
   6  -4  12   32.50    2.10
   6   4 -12   30.90    1.60
   6  -4  12   32.20    2.10
   6  -4  12   32.60    1.80
  -6  -6  14   12.40    1.60
  -6   6 -14   12.30    0.90
  -6   6 -14   11.70    1.40
   6  -6  14   12.90    1.50
   6  -6  14   13.30    1.40
   6   6 -14   16.00    1.60
   6   6 -14   11.30    1.20
   6  -6  14   13.20    1.50
  -6   8 -16    3.40    1.00
  -6  -8  16    1.80    1.00
  -6   8 -16    2.80    0.50
   6   8 -16    3.20    0.80
   6  -8  16    4.30    1.10
   6  -8  16    3.10    1.00
   6  -8  16    2.70    1.00
  -6 -10  18    0.50    1.00
  -6  10 -18    0.70    0.80
   6 -10  18   -0.60    0.80
   6  10 -18   -0.20    0.70
   6 -10  18    0.80    0.90
  -6 -12  20    1.70    1.20
  -6  12 -20    4.40    1.30
   6  12 -20    4.10    1.10
   6 -12  20    0.80    1.10
   6 -12  20    3.70    1.40
  -6 -14  22    1.70    1.40
  -6  14 -22    0.40    1.00
   6 -14  22    0.00    1.20
   6 -14  22    1.80    1.30
   6  14 -22    1.80    1.20
  -6  16 -24    3.30    1.50
  -6 -16  24    0.90    1.60
   6  16 -24    1.40    1.20
   6 -16  24    0.40    1.20
   6 -16  24    4.20    1.70
  -6 -18  26    8.90    2.20
  -6  18 -26    5.80    1.90
   6 -18  26    6.70    2.20
   6  18 -26    6.10    1.80
   6 -18  26    3.10    1.40
  -6  20 -28   -0.30    1.50
   6  20 -28    0.50    1.60
   6 -20  28   -2.10    1.50
   6 -20  28   -0.10    1.40
  -6  22 -30   -0.40    1.80
   6  22 -30    1.20    1.80
   6 -22  30    0.30    1.60
   6 -22  30   -1.30    1.70
  -7  27 -19    2.50    1.80
   7  27 -19    2.80    1.90
   7 -27  19    2.50    1.90
   7 -27  19    4.10    2.10
  -7  25 -17    0.90    1.50
   7  25 -17   -2.80    1.40
   7 -25  17    2.60    1.80
   7 -25  17    0.20    1.40
   7 -25  17   -0.50    1.50
  -7  23 -15   -1.00    1.10
  -7 -23  15   -2.30    1.20
   7  23 -15   -0.60    1.30
   7 -23  15   -1.10    1.10
   7 -23  15    0.20    1.40
   7 -23  15   -0.20    1.40
  -7  21 -13    9.10    1.80
  -7 -21  13    9.50    2.00
   7 -21  13    5.90    1.80
   7  21 -13    6.70    1.70
   7 -21  13    6.10    1.60
   7 -21  13    4.70    1.60
  -7  19 -11   -0.20    0.90
  -7 -19  11    0.70    1.20
   7  19 -11    1.70    1.20
   7 -19  11    0.30    1.00
   7 -19  11   -0.10    1.20
   7 -19  11    2.60    1.30
  -7  17  -9    0.80    0.90
  -7 -17   9    0.20    1.10
   7  17  -9   -1.30    0.80
   7 -17   9    1.30    1.10
   7 -17   9    1.00    1.00
   7 -17   9    1.50    1.20
  -7 -15   7   24.50    2.20
  -7  15  -7   27.40    2.10
   7 -15   7   34.20    2.20
   7 -15   7   29.30    2.40
   7  15  -7   33.60    2.20
   7 -15   7   28.00    2.20
  -7  13  -5   14.60    1.60
  -7 -13   5   14.50    1.70
   7  13  -5   13.20    1.50
   7 -13   5   13.70    1.70
   7 -13   5   16.60    1.60
   7 -13   5   16.70    1.70
  -7 -11   3    3.40    1.00
  -7  11  -3    3.80    0.90
   7  11  -3    1.60    0.80
   7 -11   3    3.00    0.90
   7 -11   3    2.80    0.80
   7 -11   3    2.60    0.90
  -7   9  -1   25.80    1.70
  -7  -9   1   27.70    1.90
   7  -9   1   25.30    1.80
   7  -9   1   28.30    1.80
   7   9  -1   30.80    1.90
   7  -9   1   26.80    1.60
  -7   7   1   13.50    1.20
  -7  -7  -1    9.90    1.30
   7   7   1   11.90    1.30
   7  -7  -1   10.70    1.00
   7  -7  -1   10.80    1.20
   7  -7  -1   12.90    1.30
  -7  -5  -3   20.90    1.50
  -7   5   3   19.50    1.30
   7  -5  -3   18.90    1.30
   7   5   3   20.80    1.50
   7  -5  -3   19.00    1.20
  -7   3   5   13.70    1.30
  -7  -3  -5   14.30    1.20
   7  -3  -5   13.60    0.90
   7   3   5   16.40    1.30
   7   3   5   14.20    1.30
   7  -3  -5   14.20    1.10
  -7   1   7   39.40    2.10
  -7  -1  -7   36.90    1.80
   7  -1  -7   37.10    1.80
   7   1   7   36.60    2.00
   7   1   7   35.00    1.90
   7  -1  -7   34.20    1.50
   7   1   7   35.80    1.80
  -7   1  -9    3.40    0.70
  -7  -1   9    4.90    1.10
   7   1  -9    3.80    0.70
   7  -1   9    4.20    0.90
   7   1  -9    3.40    0.60
   7  -1   9    4.50    0.60
   7  -1   9    3.50    0.80
  -7  -3  11    1.10    0.80
  -7   3 -11   -0.20    0.40
   7  -3  11    0.70    0.70
   7  -3  11   -0.20    0.70
   7  -3  11   -0.10    0.50
   7   3 -11   -0.20    0.50
   7   3 -11    0.10    0.60
  -7  -5  13   35.80    2.40
  -7   5 -13   37.60    1.70
   7   5 -13   41.30    2.20
   7  -5  13   39.90    2.30
   7  -5  13   36.70    2.10
   7  -5  13   42.20    2.40
   7   5 -13   39.10    1.90
  -7   7 -15   26.50    1.30
  -7   7 -15   29.10    2.10
  -7  -7  15   25.70    2.10
   7  -7  15   23.30    1.80
   7  -7  15   27.60    2.00
   7   7 -15   27.70    1.70
   7  -7  15   27.20    2.10
   7   7 -15   34.00    2.10
  -7  -9  17    2.90    1.10
  -7   9 -17    2.70    1.00
   7  -9  17    4.80    1.30
   7  -9  17    5.90    1.30
   7  -9  17    6.30    1.20
   7   9 -17    4.00    1.00
  -7 -11  19   -1.70    0.90
  -7  11 -19   -0.30    0.90
   7 -11  19   -0.10    0.90
   7 -11  19   -0.10    1.00
   7 -11  19   -0.20    1.00
   7  11 -19    0.30    0.80
  -7 -13  21   13.30    2.20
  -7  13 -21    8.20    1.70
   7 -13  21   12.60    2.10
   7  13 -21   13.00    1.80
   7 -13  21   15.50    2.10
  -7  15 -23   15.60    2.20
  -7 -15  23   23.30    2.90
   7 -15  23   14.40    2.30
   7  15 -23   20.40    2.30
   7 -15  23   12.90    2.20
  -7 -17  25    0.70    1.60
  -7  17 -25   -0.50    1.30
   7 -17  25   -0.10    1.20
   7  17 -25   -1.60    1.10
   7 -17  25    0.70    1.60
  -7 -19  27   12.30    2.60
  -7  19 -27    4.20    1.80
   7  19 -27    8.50    2.10
   7 -19  27    8.80    1.90
   7 -19  27    5.90    2.20
  -7  21 -29   -0.40    1.60
   7 -21  29   -0.20    1.40
   7 -21  29    1.10    1.90
   7  21 -29    2.40    1.70
  -8  26 -18    1.90    1.60
   8 -26  18    0.70    1.80
   8 -26  18    0.90    1.80
   8  26 -18   -2.50    1.60
   8 -26  18    0.50    1.40
  -8  24 -16   -1.50    1.20
  -8 -24  16   -1.70    1.50
   8 -24  16    1.50    1.40
   8  24 -16    0.70    1.50
   8 -24  16   -1.60    1.30
   8 -24  16    0.20    1.70
  -8 -22  14    3.80    1.70
  -8  22 -14    2.00    1.40
   8 -22  14    5.00    1.90
   8 -22  14    5.40    1.60
   8  22 -14    2.00    1.50
   8 -22  14    2.40    1.60
  -8 -20  12   -0.30    1.20
  -8  20 -12   -0.40    0.90
   8 -20  12   -0.80    1.20
   8  20 -12    0.10    1.20
   8 -20  12    0.00    1.00
   8 -20  12    0.00    1.20
  -8 -18  10    6.80    1.70
  -8  18 -10    4.20    1.30
   8 -18  10    8.40    1.80
   8  18 -10    7.60    1.50
   8 -18  10    6.80    1.60
   8 -18  10    4.40    1.30
  -8  16  -8   -0.90    0.80
  -8 -16   8    1.10    1.10
   8 -16   8   -1.50    0.80
   8 -16   8    0.40    0.90
   8 -16   8   -0.50    0.90
   8  16  -8   -0.10    0.90
  -8  14  -6   22.70    1.90
  -8 -14   6   17.20    2.00
   8  14  -6   18.40    1.80
   8 -14   6   20.20    2.20
   8 -14   6   23.80    2.00
   8 -14   6   22.70    1.80
  -8  12  -4    1.20    0.70
  -8 -12   4    1.30    0.90
   8 -12   4    0.80    0.80
   8 -12   4    0.30    0.60
   8 -12   4    0.80    0.80
   8  12  -4    1.10    0.80
  -8 -10   2   63.09    3.10
  -8  10  -2   60.69    2.90
   8 -10   2   65.59    2.90
   8 -10   2   61.99    3.00
   8  10  -2   62.09    3.00
   8 -10   2   63.49    3.00
  -8  -8   0   59.09    3.00
  -8   8   0   66.29    2.80
   8   8   0   64.29    2.90
   8  -8   0   63.19    2.90
   8  -8   0   65.59    2.70
   8  -8   0   61.69    2.90
  -8  -6  -2  183.58    6.30
  -8   6   2  173.28    6.00
   8   6   2  183.58    6.30
   8  -6  -2  177.68    5.90
   8  -6  -2  171.38    6.10
  -8  -4  -4    1.10    0.70
  -8   4   4   -0.60    0.60
   8  -4  -4    0.50    0.50
   8  -4  -4    1.00    0.50
   8   4   4    0.10    0.60
  -8   2   6   24.10    1.70
  -8  -2  -6   20.00    1.40
   8  -2  -6   22.30    1.40
   8   2   6   22.90    1.60
   8  -2  -6   20.50    1.20
   8   2   6   19.80    1.60
  -8   0   8   22.60    1.80
  -8   0  -8   23.50    1.50
   8   0   8   23.40    1.70
   8   0   8   21.90    1.00
   8   0  -8   20.50    1.40
   8   0   8   23.10    1.60
   8   0  -8   21.90    1.30
  -8  -2  10   -0.20    0.70
  -8   2 -10    0.30    0.50
   8   2 -10   -0.10    0.60
   8  -2  10    1.10    0.50
   8  -2  10    0.40    0.70
   8  -2  10    0.50    0.70
   8   2 -10    0.30    0.50
  -8   4 -12    2.70    0.60
  -8  -4  12    3.90    1.10
   8   4 -12    2.40    0.70
   8   4 -12    3.80    0.80
   8  -4  12    3.10    0.90
   8  -4  12    4.20    1.00
   8  -4  12    4.00    0.80
  -8   6 -14    9.20    0.80
  -8   6 -14   11.80    1.40
  -8  -6  14   14.00    1.70
   8   6 -14   12.00    1.20
   8  -6  14    9.00    1.30
   8  -6  14   12.50    1.30
   8   6 -14   14.90    1.50
   8  -6  14   11.00    1.50
  -8  -8  16   21.70    2.20
  -8   8 -16   25.20    2.10
   8  -8  16   24.30    2.30
   8  -8  16   24.40    2.30
   8   8 -16   25.90    1.90
   8  -8  16   23.80    1.90
   8   8 -16   22.50    1.70
  -8  10 -18   44.30    2.90
  -8 -10  18   46.80    3.20
   8  10 -18   48.70    2.90
   8 -10  18   53.19    3.00
   8  10 -18   52.19    2.80
   8 -10  18   46.70    3.10
   8 -10  18   49.60    3.10
  -8  12 -20   15.30    2.00
  -8 -12  20   13.40    2.20
   8 -12  20   13.90    2.00
   8 -12  20   16.10    2.20
   8  12 -20   17.60    1.90
   8 -12  20   16.90    2.20
  -8 -14  22   71.39    4.40
  -8  14 -22   73.09    4.20
   8 -14  22   58.99    4.00
   8  14 -22   80.69    4.00
   8 -14  22   71.29    4.20
  -8  16 -24   11.60    2.00
  -8 -16  24   16.20    2.70
   8 -16  24    9.10    2.20
   8 -16  24   11.60    2.10
   8  16 -24   10.70    1.90
  -8 -18  26    6.80    2.20
  -8  18 -26    5.70    1.70
   8 -18  26    4.60    2.10
   8 -18  26    4.20    1.70
   8  18 -26    5.40    1.70
  -8  20 -28   -1.00    1.50
  -8 -20  28   -1.60    1.70
   8  20 -28    1.10    1.70
   8 -20  28    0.40    1.40
   8 -20  28   -2.60    1.70
  -8  22 -30    6.30    2.20
   8 -22  30    2.00    1.70
   8  22 -30    5.50    2.20
  -9  27 -19    3.20    1.90
   9 -27  19    0.40    1.80
   9 -27  19   -1.60    1.60
   9 -27  19    2.00    1.60
   9  27 -19    1.40    1.80
  -9  25 -17   -0.10    1.40
  -9 -25  17    2.50    1.80
   9 -25  17    2.30    1.80
   9 -25  17   -0.20    1.30
   9 -25  17    1.50    1.60
   9  25 -17    2.40    1.80
  -9  23 -15   -0.30    1.30
  -9 -23  15    0.30    1.60
   9 -23  15    1.10    1.30
   9  23 -15    1.80    1.60
   9 -23  15    1.40    1.50
   9 -23  15   -0.50    1.50
  -9  21 -13    4.50    1.50
  -9 -21  13    5.10    1.80
   9 -21  13    4.00    1.80
   9 -21  13    5.20    1.80
   9  21 -13    4.30    1.60
   9 -21  13    2.50    1.40
  -9 -19  11    6.40    1.80
  -9  19 -11    1.00    1.10
   9  19 -11    1.60    1.30
   9 -19  11    1.90    1.30
   9 -19  11    2.30    1.50
   9 -19  11    1.80    1.40
  -9  17  -9    2.30    1.10
  -9 -17   9    2.00    1.20
   9 -17   9    2.70    1.20
   9 -17   9    4.00    1.40
   9 -17   9    1.50    1.00
   9  17  -9    1.40    1.20
  -9  15  -7   52.99    3.10
  -9 -15   7   57.99    3.40
   9 -15   7   53.89    3.20
   9 -15   7   53.29    3.30
   9 -15   7   61.89    3.20
   9  15  -7   56.09    3.10
  -9  13  -5    1.80    0.90
  -9 -13   5   -0.40    0.90
   9 -13   5    0.30    0.80
   9 -13   5    0.30    0.70
   9 -13   5    0.40    0.90
   9  13  -5    1.60    0.90
  -9 -11   3   -0.10    0.80
  -9  11  -3    2.30    0.80
   9  11  -3    1.20    0.80
   9 -11   3    1.20    0.80
   9 -11   3    1.70    0.80
   9 -11   3    2.20    0.90
  -9  -9   1   81.29    3.80
  -9   9  -1   87.39    3.60
   9   9  -1   84.09    3.70
   9  -9   1   85.29    3.50
   9  -9   1   86.89    3.70
   9  -9   1   85.19    3.60
  -9  -7  -1  127.79    4.90
  -9   7   1  123.69    4.60
  -9   7   1  125.09    4.50
   9  -7  -1  127.09    4.60
   9   7   1  131.09    4.90
   9  -7  -1  121.39    4.70
  -9  -5  -3   12.20    1.30
  -9   5   3   10.40    1.20
   9   5   3   10.90    1.40
   9  -5  -3    9.40    1.00
   9   5   3    8.80    0.60
   9  -5  -3   10.30    1.10
  -9  -3  -5   39.10    2.20
  -9   3   5   39.40    2.30
   9  -3  -5   39.60    2.00
   9  -3  -5   41.50    2.00
   9   3   5   42.20    2.30
   9   3   5   43.00    2.20
  -9   1   7  369.06   12.00
  -9  -1  -7  373.56   11.60
   9   1   7  357.26   11.80
   9  -1  -7  355.06   11.50
   9   1   7  371.76   11.90
   9  -1  -7  359.56   11.40
   9   1   7  371.66   11.70
  -9   1  -9  161.18    5.50
  -9  -1   9  164.18    6.10
   9  -1   9  151.08    5.20
   9   1  -9  159.28    5.40
   9  -1   9  161.68    5.80
   9  -1   9  166.38    5.90
   9   1  -9  161.08    5.70
  -9   3 -11   -0.70    0.40
  -9  -3  11    1.80    0.90
   9   3 -11    0.60    0.60
   9  -3  11   -0.20    0.70
   9  -3  11    0.60    0.50
   9   3 -11    0.50    0.50
   9  -3  11    0.10    0.70
  -9   5 -13   17.60    1.10
  -9  -5  13   13.50    1.70
   9  -5  13   16.00    1.40
   9  -5  13   19.30    1.90
   9   5 -13   21.10    1.40
   9   5 -13   17.30    1.70
   9  -5  13   13.90    1.60
  -9   7 -15   -0.30    0.70
  -9  -7  15   -1.00    0.70
   9  -7  15    0.20    0.70
   9  -7  15   -0.50    0.60
   9   7 -15    0.40    0.60
   9   7 -15   -0.40    0.60
   9  -7  15   -0.30    0.80
  -9   9 -17    6.40    1.40
  -9  -9  17    6.20    1.40
   9  -9  17    7.60    1.60
   9   9 -17    8.90    1.30
   9  -9  17    6.80    1.30
   9   9 -17    7.30    1.40
   9  -9  17    7.70    1.50
  -9 -11  19    7.10    1.70
  -9  11 -19    4.90    1.30
   9  11 -19    6.10    1.30
   9 -11  19    3.80    1.20
   9 -11  19    7.30    1.70
   9  11 -19    5.00    1.30
   9 -11  19    8.10    1.60
  -9  13 -21   23.70    2.60
  -9 -13  21   18.20    2.60
   9 -13  21   22.30    2.60
   9  13 -21   18.60    2.10
   9 -13  21   22.80    2.80
   9  13 -21   18.90    2.30
   9 -13  21   16.00    2.30
  -9  15 -23   13.60    2.10
  -9 -15  23   13.00    2.50
   9 -15  23    7.50    1.80
   9 -15  23   11.10    2.10
   9  15 -23   10.70    1.90
  -9  17 -25    9.90    2.00
  -9 -17  25    5.40    2.10
   9 -17  25    6.30    1.80
   9  17 -25    5.80    1.80
   9 -17  25    6.90    2.20
  -9  19 -27    8.90    2.20
  -9 -19  27    4.90    2.20
   9 -19  27    8.00    2.50
   9 -19  27    7.50    2.10
   9  19 -27    4.40    2.00
  -9 -21  29    2.10    2.30
  -9  21 -29   -2.30    1.50
   9 -21  29   -0.20    1.50
   9  21 -29    2.50    1.90
   9 -21  29    0.80    2.30
 -10  26 -18    0.80    1.50
 -10 -26  18   -2.30    2.50
  10  26 -18    0.00    1.80
  10 -26  18    1.90    2.00
  10 -26  18    2.00    2.00
  10 -26  18   -0.30    1.40
 -10  24 -16    1.70    1.60
 -10 -24  16    4.40    1.90
  10 -24  16    2.00    1.70
  10 -24  16    2.80    1.80
  10  24 -16    3.00    1.80
  10 -24  16    3.30    1.60
 -10 -22  14   -0.30    1.50
 -10  22 -14    1.50    1.30
  10  22 -14    0.10    1.40
  10 -22  14   -0.10    1.30
  10 -22  14    0.80    1.30
  10 -22  14    1.50    1.60
 -10 -20  12    7.90    2.10
 -10  20 -12    6.80    1.60
  10 -20  12    6.40    1.80
  10  20 -12    6.00    1.70
  10 -20  12    6.80    1.90
  10 -20  12    3.20    1.50
 -10  18 -10    3.60    1.30
 -10 -18  10    3.10    1.60
  10 -18  10    1.30    1.30
  10 -18  10   -0.20    1.30
  10  18 -10    0.20    1.10
  10 -18  10    1.30    1.20
 -10  16  -8    0.40    1.00
 -10 -16   8    0.10    1.10
  10 -16   8    0.50    1.10
  10 -16   8    0.40    1.10
  10 -16   8    0.70    1.00
  10  16  -8    2.30    1.20
 -10  14  -6    4.60    1.20
 -10 -14   6    2.90    1.30
  10 -14   6    3.10    1.20
  10  14  -6    3.60    1.20
  10 -14   6    2.90    1.10
  10 -14   6    5.70    1.20
 -10  12  -4   11.80    1.50
 -10 -12   4   10.40    1.60
  10 -12   4    9.50    1.50
  10  12  -4    9.40    1.40
  10 -12   4    6.40    1.30
  10 -12   4   10.30    1.40
 -10 -10   2    5.20    1.20
 -10  10  -2    4.90    1.00
  10 -10   2    6.30    1.10
  10  10  -2    4.90    1.10
  10 -10   2    4.50    1.10
  10 -10   2    5.90    1.10
 -10  -8   0    0.90    0.80
 -10   8   0   -0.20    0.50
 -10   8   0    0.20    0.60
  10   8   0    0.50    0.40
  10  -8   0    0.30    0.60
  10  -8   0    0.30    0.60
  10   8   0    1.30    0.70
  10  -8   0   -1.00    0.60
 -10  -6  -2    0.00    0.70
 -10   6   2    0.00    0.60
  10   6   2    0.40    0.70
  10  -6  -2   -0.90    0.50
  10   6   2    0.50    0.30
  10  -6  -2    0.20    0.60
 -10   4   4   45.80    2.40
 -10  -4  -4   48.90    2.50
  10   4   4   49.20    2.60
  10   4   4   43.50    2.40
  10  -4  -4   45.60    2.20
  10  -4  -4   45.90    2.20
 -10   2   6   33.30    2.10
 -10  -2  -6   29.50    1.90
  10   2   6   31.50    2.10
  10   2   6   34.30    2.00
  10  -2  -6   29.80    1.70
  10  -2  -6   35.10    1.90
 -10   0  -8    2.80    0.70
 -10   0   8    1.50    0.90
  10   0  -8    1.60    0.60
  10   0   8    2.70    0.90
  10   0   8    1.30    0.80
  10   0   8    1.10    0.40
  10   0  -8    1.80    0.70
 -10   2 -10    8.20    1.00
 -10  -2  10   10.00    1.50
  10   2 -10   11.90    1.30
  10  -2  10    8.50    1.20
  10  -2  10    8.80    0.90
  10  -2  10    7.70    1.20
  10   2 -10   10.10    1.10
 -10   4 -12   57.59    2.40
 -10  -4  12   53.49    3.10
  10  -4  12   58.79    3.00
  10   4 -12   55.89    2.50
  10   4 -12   56.99    2.80
  10  -4  12   54.29    2.90
  10  -4  12   53.39    2.50
 -10  -6  14   26.00    2.50
  10  -6  14   23.10    1.70
  10   6 -14   26.40    1.90
  10  -6  14   25.30    2.10
  10  -6  14   24.80    2.10
  10   6 -14   24.40    1.70
 -10   8 -16   -1.30    0.70
 -10  -8  16    0.20    1.00
  10  -8  16   -0.20    0.70
  10  -8  16   -0.90    0.80
  10  -8  16   -0.20    0.70
  10   8 -16    0.20    0.70
  10   8 -16    0.40    0.80
 -10 -10  18    0.60    1.10
 -10  10 -18   -1.80    0.80
  10 -10  18    1.10    1.00
  10 -10  18    0.40    1.10
  10  10 -18    0.00    0.90
  10 -10  18    0.80    1.00
  10  10 -18    0.00    0.90
 -10  12 -20    4.60    1.40
 -10 -12  20    6.70    1.90
  10  12 -20    5.40    1.40
  10 -12  20    4.20    1.40
  10 -12  20    2.60    1.30
  10  12 -20    3.60    1.30
  10 -12  20    2.70    1.30
 -10 -14  22    0.70    1.50
 -10  14 -22    1.30    1.20
  10  14 -22   -0.10    1.20
  10 -14  22    0.20    1.30
  10  14 -22    0.50    1.00
  10 -14  22   -1.40    1.00
 -10 -16  24    0.60    1.70
 -10  16 -24   -0.30    1.30
  10 -16  24   -2.70    1.20
  10 -16  24    0.00    1.30
  10  16 -24    0.90    1.20
  10  16 -24   -1.40    1.10
 -10  18 -26    1.20    1.50
 -10 -18  26   -0.80    1.70
  10 -18  26   -1.30    1.70
  10  18 -26    5.10    1.80
  10  18 -26    2.20    1.60
  10 -18  26   -0.10    1.30
 -10  20 -28    1.80    1.70
 -10 -20  28    3.00    2.10
  10  20 -28   -1.80    1.50
  10  20 -28    0.10    1.50
  10 -20  28    3.10    2.00
  10 -20  28   -2.30    1.20
 -11  25 -17    3.00    1.90
 -11 -25  17    1.10    1.90
  11 -25  17    2.70    1.90
  11 -25  17    1.20    1.90
  11 -25  17   -0.60    1.50
  11  25 -17    4.20    2.00
 -11 -23  15    1.80    1.80
 -11  23 -15    1.20    1.50
  11 -23  15    0.10    1.60
  11 -23  15    0.50    1.70
  11  23 -15    0.60    1.60
  11 -23  15    0.10    1.40
 -11  21 -13   -0.10    1.20
 -11 -21  13    0.60    1.50
  11  21 -13    0.80    1.50
  11 -21  13    0.40    1.20
  11 -21  13    3.20    1.70
  11 -21  13    0.00    1.50
 -11 -19  11   -1.60    1.30
 -11  19 -11   -1.20    1.00
  11 -19  11    0.60    1.40
  11 -19  11   -1.00    1.00
  11 -19  11    0.10    1.30
  11  19 -11   -0.60    1.30
 -11  17  -9    1.50    1.10
 -11 -17   9   -2.10    1.20
  11 -17   9    0.00    1.10
  11 -17   9    1.30    1.10
  11  17  -9    1.30    1.20
  11 -17   9    1.20    1.20
 -11  15  -7   23.50    2.40
 -11 -15   7   22.20    2.50
  11 -15   7   21.40    2.20
  11 -15   7   18.70    2.30
  11 -15   7   27.80    2.70
  11  15  -7   21.30    2.20
 -11  13  -5   19.80    2.00
 -11 -13   5   18.80    2.20
  11 -13   5   27.30    2.20
  11 -13   5   25.20    2.40
  11  13  -5   22.90    2.20
  11 -13   5   23.20    2.20
 -11  11  -3   13.40    1.60
 -11 -11   3   13.30    1.70
  11  11  -3   15.70    1.80
  11 -11   3   17.00    2.00
  11 -11   3   12.10    1.60
  11 -11   3   14.10    1.50
 -11  -9   1   11.60    1.50
 -11   9  -1    9.30    1.30
 -11   9  -1   10.50    1.10
  11   9  -1   12.40    1.00
  11   9  -1   12.80    1.50
  11  -9   1   11.10    1.50
  11  -9   1   10.30    1.30
  11  -9   1   12.00    1.40
 -11  -7  -1   11.30    1.50
 -11   7   1   14.30    1.40
  11   7   1   10.70    0.80
  11  -7  -1   13.30    1.40
  11   7   1   11.20    1.50
  11  -7  -1   10.60    1.30
 -11   5   3    2.30    0.80
 -11  -5  -3    1.80    0.80
  11  -5  -3    2.70    0.80
  11  -5  -3    2.90    0.70
  11   5   3    2.60    0.40
  11   5   3    2.40    0.90
 -11   3   5    8.50    1.30
 -11  -3  -5    9.50    1.20
  11  -3  -5    9.40    1.10
  11   3   5   11.70    1.50
  11   3   5    8.60    1.30
  11  -3  -5    8.10    1.10
 -11   1   7   57.49    3.00
 -11  -1  -7   61.59    2.80
  11  -1  -7   59.89    2.60
  11   1   7   59.59    3.00
  11   1   7   56.69    2.00
  11  -1  -7   65.29    2.70
  11   1   7   60.09    3.10
  11   1   7   59.09    2.90
 -11   1  -9   65.19    2.80
 -11  -1   9   68.39    3.40
  11   1  -9   63.29    2.80
  11  -1   9   62.89    3.10
  11  -1   9   59.09    3.00
  11   1  -9   66.79    2.90
  11  -1   9   61.69    2.40
 -11   3 -11    1.30    0.50
 -11  -3  11    1.30    1.00
  11  -3  11    0.10    0.50
  11  -3  11    0.30    0.70
  11  -3  11   -0.40    0.50
  11   3 -11   -0.30    0.60
  11   3 -11    0.30    0.60
 -11  -5  13    1.10    0.90
 -11   5 -13    0.60    0.50
  11   5 -13    0.30    0.70
  11   5 -13    0.00    0.60
  11  -5  13    0.90    0.80
  11  -5  13    0.50    0.80
  11  -5  13    0.60    0.60
 -11  -7  15    3.40    1.30
 -11   7 -15    4.90    1.30
  11  -7  15    6.80    1.40
  11  -7  15    4.30    1.00
  11  -7  15    9.60    1.60
  11   7 -15    5.80    1.10
  11   7 -15    5.90    1.20
 -11   9 -17    1.40    1.10
 -11  -9  17    2.40    1.20
  11  -9  17    0.00    1.00
  11  -9  17    1.70    1.10
  11   9 -17    0.60    0.90
  11   9 -17    1.60    1.00
  11  -9  17    2.40    1.00
 -11 -11  19   -0.70    1.20
 -11  11 -19   -0.10    1.00
  11 -11  19   -0.20    1.10
  11  11 -19   -1.80    0.80
  11  11 -19   -0.30    0.90
  11 -11  19   -0.20    1.00
  11 -11  19    2.10    1.10
 -11  13 -21   11.10    2.10
 -11 -13  21    9.90    2.30
  11  13 -21   13.40    1.90
  11 -13  21    9.00    2.00
  11 -13  21   10.90    2.00
  11 -13  21   15.00    2.20
  11  13 -21   15.40    2.10
 -11  15 -23    4.60    1.60
 -11 -15  23    3.90    1.90
  11  15 -23    7.60    1.70
  11 -15  23    2.10    1.50
  11  15 -23    4.20    1.50
  11 -15  23    2.00    1.70
 -11  17 -25    2.00    1.40
 -11 -17  25   -1.30    1.70
  11  17 -25    0.30    1.30
  11 -17  25    2.90    1.80
  11  17 -25    0.10    1.40
  11 -17  25    0.30    1.40
 -11  19 -27    0.80    1.60
 -11 -19  27    6.40    2.30
  11  19 -27    3.80    1.80
  11  19 -27    3.80    1.70
  11 -19  27    5.80    2.40
  11 -19  27    6.50    2.10
 -12 -24  16    1.80    2.00
 -12  24 -16    2.10    1.50
  12 -24  16    0.70    1.50
  12 -24  16   -0.40    1.60
  12 -24  16   -0.60    1.70
  12  24 -16    1.20    1.80
 -12 -22  14    1.70    1.80
 -12  22 -14    0.30    1.20
  12 -22  14    0.30    1.40
  12  22 -14    0.20    1.60
  12 -22  14   -0.60    1.40
  12 -22  14    0.60    1.60
 -12 -20  12    0.90    1.70
 -12  20 -12    0.60    1.30
  12 -20  12    2.40    1.50
  12 -20  12    0.40    1.20
  12 -20  12    3.60    1.60
  12  20 -12   -0.40    1.40
 -12  18 -10    0.50    1.00
 -12 -18  10    0.80    1.40
  12 -18  10    0.50    1.40
  12 -18  10   -0.10    1.10
  12  18 -10    0.70    1.40
  12 -18  10    0.00    1.20
 -12 -16   8    8.30    1.80
 -12  16  -8    5.10    1.50
  12 -16   8    6.50    1.70
  12 -16   8    3.10    1.40
  12 -16   8    8.90    1.70
  12  16  -8    4.00    1.50
 -12  14  -6    9.60    1.60
 -12 -14   6    7.10    1.60
  12 -14   6    7.00    1.60
  12 -14   6   10.60    1.60
  12 -14   6    8.10    1.60
  12  14  -6    7.90    1.50
 -12  12  -4    0.40    0.90
 -12 -12   4    0.90    1.00
  12  12  -4    0.50    1.00
  12 -12   4   -0.60    0.70
  12 -12   4    0.30    0.80
  12 -12   4   -0.60    0.90
 -12  10  -2   13.60    1.60
 -12 -10   2   10.30    1.60
  12 -10   2   12.70    1.50
  12 -10   2   12.50    1.70
  12  10  -2   14.10    1.80
  12  10  -2   10.20    1.10
  12 -10   2   13.10    1.60
 -12  -8   0   69.09    3.50
 -12   8   0   65.19    2.90
  12  -8   0   67.59    3.10
  12  -8   0   62.29    3.30
  12  -8   0   65.59    3.10
  12   8   0   70.49    3.40
 -12   6   2   12.30    1.40
 -12  -6  -2   12.70    1.60
  12  -6  -2   12.60    1.40
  12   6   2   14.60    1.70
  12  -6  -2   12.40    1.40
 -12   4   4    1.40    0.70
 -12  -4  -4    0.60    0.70
  12   4   4   -0.60    0.50
  12   4   4    1.00    0.80
  12  -4  -4   -0.40    0.50
  12  -4  -4    0.40    0.50
 -12   2   6    1.20    0.80
 -12  -2  -6    2.10    0.80
  12   2   6    1.20    0.90
  12  -2  -6    0.90    0.60
  12  -2  -6    1.00    0.60
  12  -2  -6    1.90    0.70
  12   2   6    0.60    0.70
 -12   0  -8  168.88    6.20
 -12   0   8  171.18    6.70
  12   0  -8  172.78    6.10
  12   0  -8  175.78    6.20
  12   0   8  180.48    6.50
  12   0   8  181.98    6.60
 -12  -2  10   43.70    2.80
 -12   2 -10   42.40    2.20
  12  -2  10   40.60    2.60
  12  -2  10   44.10    2.60
  12   2 -10   47.80    2.40
  12   2 -10   47.20    2.30
 -12  -4  12    0.90    1.00
 -12   4 -12    0.60    0.50
  12   4 -12    1.70    0.80
  12  -4  12    2.10    1.00
  12  -4  12    1.90    0.60
  12  -4  12    0.30    0.80
  12   4 -12    0.10    0.70
 -12  -6  14   14.00    2.00
  12   6 -14   10.80    1.40
  12  -6  14    8.10    1.20
  12  -6  14   12.50    1.70
  12   6 -14   10.90    1.50
  12  -6  14   10.10    1.70
 -12  -8  16    5.90    1.60
 -12   8 -16    7.00    1.50
  12   8 -16    3.40    1.10
  12  -8  16    5.90    1.50
  12  -8  16    5.10    1.20
  12   8 -16    2.50    1.10
  12  -8  16    5.30    1.50
 -12  10 -18   -1.10    0.90
 -12 -10  18    1.00    1.20
  12  10 -18    1.10    1.00
  12 -10  18    1.20    1.00
  12 -10  18    0.80    1.10
  12  10 -18    0.20    1.00
  12 -10  18   -0.20    1.10
 -12  12 -20    6.90    1.70
 -12 -12  20    7.50    2.00
  12 -12  20    8.10    1.70
  12 -12  20    7.40    1.60
  12  12 -20    5.60    1.40
  12  12 -20    7.70    1.60
  12 -12  20    7.60    1.80
 -12  14 -22    8.30    1.90
 -12 -14  22    6.60    2.30
  12 -14  22    8.00    2.00
  12  14 -22    9.90    1.80
  12 -14  22    6.30    1.80
  12 -14  22   10.50    1.90
  12  14 -22    9.70    1.80
 -12 -16  24   -0.40    1.80
 -12  16 -24    2.40    1.50
  12 -16  24   -0.50    1.30
  12  16 -24    3.20    1.40
  12 -16  24    0.60    1.60
  12  16 -24    1.00    1.40
 -12 -18  26    2.90    2.10
 -12  18 -26    3.10    1.60
  12 -18  26    0.20    1.40
  12  18 -26    3.80    1.70
  12  18 -26    2.80    1.70
  12 -18  26    6.10    2.30
 -12 -20  28    3.20    2.50
 -12  20 -28    0.40    1.50
  12  20 -28    0.80    1.80
  12  20 -28    2.50    1.60
  12 -20  28    0.90    1.70
 -13  25 -17    3.20    1.80
 -13 -25  17    0.40    1.90
  13  25 -17    5.50    2.10
  13 -25  17    3.60    2.10
  13 -25  17    3.70    2.20
 -13  23 -15   -1.20    1.20
 -13 -23  15   -2.80    1.60
  13 -23  15    0.10    1.30
  13 -23  15   -1.40    1.50
  13  23 -15   -1.30    1.50
  13 -23  15    1.70    1.60
 -13  21 -13    2.50    1.50
 -13 -21  13    3.60    1.90
  13  21 -13    4.00    1.90
  13 -21  13    5.70    1.90
  13 -21  13    6.00    2.00
  13 -21  13    1.40    1.40
 -13  19 -11    3.00    1.30
 -13 -19  11    5.30    2.00
  13 -19  11   -0.70    1.20
  13 -19  11    2.90    1.50
  13 -19  11    1.90    1.30
  13  19 -11    2.10    1.60
 -13 -17   9    2.80    1.70
 -13  17  -9    3.70    1.50
  13 -17   9    5.80    1.50
  13 -17   9    5.30    1.70
  13  17  -9    5.80    1.60
  13 -17   9    4.80    1.60
 -13  15  -7   15.40    2.10
 -13 -15   7   13.40    2.20
  13 -15   7   15.80    2.20
  13 -15   7   16.90    2.30
  13  15  -7   15.00    2.10
  13 -15   7   16.60    2.10
 -13 -13   5    0.00    1.10
 -13  13  -5    1.50    1.00
  13 -13   5   -0.20    1.00
  13 -13   5    1.60    1.10
  13 -13   5    1.80    1.00
  13  13  -5   -0.30    1.00
 -13 -11   3    0.50    1.10
 -13  11  -3    0.70    0.90
  13 -11   3    0.90    0.90
  13 -11   3    0.30    1.00
  13  11  -3   -0.20    1.00
  13 -11   3    1.30    0.90
 -13   9  -1   15.50    1.70
 -13  -9   1   15.60    1.90
  13   9  -1   15.40    1.80
  13  -9   1   15.60    1.90
  13  -9   1   17.30    1.70
  13  -9   1   13.30    1.60
 -13   7   1    0.60    0.70
 -13  -7  -1    1.00    0.90
  13  -7  -1    1.60    0.70
  13  -7  -1    0.60    0.70
  13   7   1    0.60    0.90
 -13  -5  -3    6.10    1.20
 -13   5   3    6.40    1.20
  13  -5  -3    7.60    1.20
  13  -5  -3    7.50    1.10
  13   5   3    5.60    1.10
  13   5   3    6.80    1.30
 -13   3   5    4.60    1.00
 -13  -3  -5    4.00    1.00
  13   3   5    4.60    1.10
  13   3   5    4.10    1.10
  13  -3  -5    4.30    0.90
  13  -3  -5    5.20    0.90
 -13   1   7    6.60    1.30
 -13  -1  -7    8.00    1.20
  13   1   7    9.50    1.40
  13   1   7   10.10    1.50
  13  -1  -7    8.70    1.10
  13   1   7   12.60    1.60
  13  -1  -7    7.80    1.20
 -13  -1   9   17.40    2.00
 -13   1  -9   17.40    1.50
  13  -1   9   19.10    1.90
  13  -1   9   15.10    1.70
  13   1  -9   16.80    1.60
  13   1  -9   16.60    1.60
 -13  -3  11    6.90    1.50
 -13   3 -11    9.20    1.10
  13   3 -11   11.80    1.40
  13  -3  11   10.60    1.60
  13   3 -11   10.50    1.30
  13  -3  11   11.00    1.60
 -13  -5  13    4.00    1.30
  13   5 -13    2.20    0.90
  13  -5  13    3.00    1.10
  13   5 -13    2.90    1.00
  13  -5  13    2.50    1.10
 -13  -7  15    4.90    1.50
  13  -7  15    4.60    1.30
  13   7 -15    3.70    1.10
  13   7 -15    3.70    1.10
  13  -7  15    2.70    1.30
 -13  -9  17    8.60    1.90
 -13   9 -17    9.50    1.70
  13   9 -17    5.20    1.30
  13  -9  17    8.00    1.70
  13   9 -17    6.90    1.30
  13  -9  17    6.80    1.60
 -13  11 -19    8.10    1.80
 -13 -11  19    5.40    1.90
  13  11 -19    7.70    1.60
  13  11 -19    9.90    1.70
  13 -11  19    5.70    1.60
  13 -11  19    9.80    1.90
 -13  13 -21    6.30    1.70
 -13 -13  21    8.00    2.10
  13 -13  21    5.30    1.70
  13 -13  21    5.50    1.80
  13  13 -21    5.70    1.60
  13  13 -21    5.30    1.50
 -13  15 -23    3.20    1.50
 -13 -15  23    6.20    2.30
  13  15 -23    3.30    1.40
  13 -15  23    2.40    1.70
  13  15 -23    4.60    1.60
  13 -15  23    4.30    1.70
 -13  17 -25    1.70    1.50
 -13 -17  25    0.60    1.90
  13  17 -25   -2.70    1.10
  13 -17  25    2.20    1.70
  13  17 -25   -1.50    1.50
  13 -17  25   -1.80    1.30
 -13  19 -27   -2.20    1.10
 -13 -19  27    0.20    2.10
  13 -19  27    0.20    1.40
  13  19 -27    0.90    1.50
 -14 -24  16    0.80    2.00
 -14  24 -16    0.40    1.50
  14 -24  16    1.40    1.70
  14 -24  16    4.10    2.00
  14  24 -16    1.60    2.00
 -14  22 -14   -0.20    1.40
 -14 -22  14    1.80    1.90
  14  22 -14    0.90    1.70
  14 -22  14    2.20    1.70
  14 -22  14    1.60    1.80
  14 -22  14    0.90    1.50
 -14  20 -12    1.20    1.30
 -14 -20  12    0.90    1.70
  14 -20  12    2.10    1.60
  14 -20  12    1.40    1.70
  14 -20  12    1.20    1.40
  14  20 -12    4.50    1.90
 -14  18 -10    0.10    1.10
 -14 -18  10    0.00    1.50
  14  18 -10    0.20    1.40
  14 -18  10    2.80    1.60
  14 -18  10    0.80    1.50
  14 -18  10    0.50    1.20
 -14  16  -8   -0.80    1.00
 -14 -16   8    1.60    1.60
  14 -16   8   -0.50    1.10
  14 -16   8    0.50    1.20
  14  16  -8    0.10    1.40
  14 -16   8    0.10    1.30
 -14  14  -6    3.70    1.30
 -14 -14   6    1.90    1.40
  14  14  -6    1.50    1.30
  14 -14   6    2.50    1.30
  14 -14   6    4.00    1.30
  14 -14   6    3.90    1.50
 -14  12  -4    9.30    1.70
 -14 -12   4    8.40    1.80
  14 -12   4   11.10    1.90
  14 -12   4   11.80    1.70
  14 -12   4    6.60    1.40
  14  12  -4   11.80    1.90
 -14 -10   2    0.50    1.10
 -14  10  -2   -1.00    0.80
  14  10  -2    0.90    1.00
  14 -10   2    0.60    0.80
  14 -10   2    0.20    1.00
  14 -10   2    0.00    0.80
 -14  -8   0   -0.40    0.90
  14  -8   0   -1.20    0.70
  14   8   0   -0.20    0.90
  14  -8   0   -0.10    0.90
  14  -8   0   -0.90    0.60
 -14   6   2    1.00    0.70
 -14  -6  -2   -0.60    0.80
  14   6   2   -0.20    0.90
  14  -6  -2    0.60    0.70
  14  -6  -2    0.70    0.70
 -14  -4  -4    6.60    1.20
 -14   4   4    6.00    1.20
  14   4   4    6.10    1.30
  14  -4  -4    5.40    1.10
  14  -4  -4    4.90    0.90
  14   4   4    3.10    1.10
 -14   2   6   28.80    2.20
 -14  -2  -6   24.50    2.00
  14   2   6   28.30    2.30
  14  -2  -6   25.70    1.80
  14  -2  -6   25.60    1.90
  14   2   6   26.00    2.10
 -14   0  -8    1.20    0.70
 -14   0   8    0.60    0.90
  14   0  -8    0.50    0.70
  14   0  -8    0.50    0.60
  14   0   8    1.90    1.00
  14   0   8    1.60    0.90
 -14  -2  10    1.50    1.00
 -14   2 -10    1.70    0.80
  14   2 -10    1.60    0.80
  14  -2  10    1.20    1.00
  14   2 -10    3.90    1.00
  14  -2  10    2.60    1.10
 -14  -4  12   12.40    2.00
  14  -4  12   12.50    1.90
  14   4 -12   12.50    1.60
  14  -4  12   15.40    2.00
  14   4 -12   11.40    1.50
 -14  -6  14    9.80    2.00
  14   6 -14    7.70    1.40
  14  -6  14    7.40    1.70
  14   6 -14   10.20    1.50
  14  -6  14    9.10    1.70
 -14  -8  16    1.20    1.30
 -14   8 -16   -1.20    1.00
  14   8 -16    0.90    0.90
  14  -8  16    0.00    1.10
  14   8 -16   -0.60    0.90
  14  -8  16   -0.80    1.00
 -14 -10  18    4.30    1.70
 -14  10 -18    3.40    1.40
  14  10 -18    3.10    1.20
  14 -10  18    4.40    1.60
  14  10 -18    3.10    1.20
  14 -10  18    3.50    1.30
 -14 -12  20    3.50    1.80
 -14  12 -20    3.90    1.50
  14 -12  20    2.60    1.50
  14  12 -20    3.10    1.30
  14  12 -20    5.10    1.50
  14 -12  20    5.50    1.80
 -14 -14  22    7.30    2.40
 -14  14 -22    1.40    1.30
  14 -14  22    3.10    1.50
  14 -14  22    1.30    1.70
  14  14 -22    5.20    1.50
  14  14 -22    3.60    1.70
 -14  16 -24    2.60    1.70
 -14 -16  24    6.00    2.30
  14  16 -24    2.80    1.40
  14 -16  24    2.00    1.60
  14 -16  24    2.10    1.80
 -14 -18  26    1.00    2.20
 -14  18 -26    4.20    1.80
  14 -18  26   -1.00    1.80
  14  18 -26    0.70    1.40
  14 -18  26    3.90    1.80
 -15  23 -15    5.80    1.80
 -15 -23  15    7.70    2.50
  15  23 -15    4.20    2.10
  15 -23  15    2.50    1.90
  15 -23  15    3.90    2.10
 -15  21 -13    1.10    1.30
 -15 -21  13    1.90    1.90
  15  21 -13    1.60    1.90
  15 -21  13   -0.90    1.60
  15 -21  13    0.40    1.40
  15 -21  13    0.00    1.50
 -15 -19  11   -0.50    1.60
 -15  19 -11    0.90    1.30
  15 -19  11    1.10    1.60
  15 -19  11    0.80    1.50
  15  19 -11   -2.10    1.40
  15 -19  11    1.40    1.40
 -15 -17   9    1.60    1.70
 -15  17  -9    2.50    1.40
  15 -17   9    0.10    1.30
  15 -17   9    2.10    1.60
  15 -17   9    1.60    1.30
  15  17  -9    0.50    1.40
 -15  15  -7   -0.10    1.10
 -15 -15   7   -0.10    1.40
  15  15  -7   -0.30    1.30
  15 -15   7   -0.60    1.10
  15 -15   7    3.70    1.50
  15 -15   7   -0.60    1.10
 -15 -13   5    0.30    1.40
 -15  13  -5   -0.60    1.00
  15 -13   5   -0.30    1.00
  15  13  -5   -0.50    1.20
  15 -13   5    0.80    1.10
  15 -13   5   -1.50    0.80
 -15  11  -3    2.20    1.10
 -15 -11   3    2.40    1.40
  15 -11   3    0.70    1.10
  15 -11   3    0.90    1.00
  15  11  -3    1.70    1.20
  15 -11   3    1.40    1.10
 -15  -9   1   28.60    2.90
 -15   9  -1   28.60    2.20
  15   9  -1   32.00    2.90
  15  -9   1   30.60    2.60
  15  -9   1   27.30    2.20
  15  -9   1   31.60    2.20
 -15  -7  -1    1.90    1.20
  15   7   1    3.50    1.30
  15  -7  -1    2.80    1.00
  15  -7  -1    0.90    0.80
 -15  -5  -3   -0.60    0.90
 -15   5   3   -0.20    0.80
  15  -5  -3   -0.60    0.60
  15   5   3    0.80    1.00
  15  -5  -3    0.80    0.80
  15   5   3   -2.20    0.90
 -15   3   5    3.70    1.10
 -15  -3  -5    5.60    1.20
  15  -3  -5    2.90    1.00
  15   3   5    5.90    1.40
  15   3   5    3.30    1.10
  15  -3  -5    4.60    1.00
 -15  -1  -7    1.20    0.90
 -15   1   7    0.20    0.90
  15  -1  -7    1.40    0.80
  15   1   7    0.70    1.00
  15   1   7    1.60    1.00
  15  -1  -7    1.30    0.80
  15  -1  -7    1.70    0.70
 -15  -1   9   -0.20    1.00
 -15   1  -9    0.10    0.70
  15  -1   9    0.60    0.90
  15  -1   9    1.50    1.00
  15   1  -9    1.90    0.90
  15   1  -9    0.70    0.70
 -15  -3  11    1.20    1.20
  15   3 -11    3.20    1.00
  15  -3  11    4.00    1.30
  15  -3  11    0.70    1.10
  15   3 -11    2.10    0.90
 -15  -5  13   -1.00    1.10
  15  -5  13    0.70    1.10
  15   5 -13    1.00    1.00
  15   5 -13    0.30    0.80
  15  -5  13   -0.30    1.00
 -15  -7  15   19.90    2.80
  15  -7  15   18.30    2.30
  15  -7  15   17.10    2.30
  15   7 -15   18.90    2.00
  15   7 -15   19.60    2.20
 -15   9 -17   -0.50    1.00
 -15  -9  17    2.30    1.60
  15  -9  17    0.20    1.10
  15   9 -17    1.40    1.00
  15   9 -17    0.30    1.10
  15  -9  17   -0.10    1.20
 -15 -11  19    3.80    1.70
 -15  11 -19   -1.80    1.10
  15  11 -19    1.20    1.30
  15 -11  19    3.40    1.50
  15 -11  19    1.00    1.30
  15  11 -19    1.50    1.10
 -15  13 -21   12.00    2.20
 -15 -13  21    7.40    2.20
  15 -13  21    7.60    1.90
  15 -13  21    9.50    2.30
  15  13 -21    9.50    1.80
 -15 -15  23   19.10    3.10
 -15  15 -23   16.80    2.70
  15 -15  23   17.00    2.70
  15  15 -23   22.40    2.70
  15 -15  23   18.60    3.00
 -15  17 -25    2.80    1.60
 -15 -17  25    4.20    2.40
  15 -17  25    1.00    1.80
  15  17 -25   -0.40    1.10
  15 -17  25    1.70    1.60
 -16 -22  14    3.10    2.30
 -16  22 -14    2.40    1.70
  16 -22  14    2.90    1.90
  16 -22  14    6.80    2.30
  16  22 -14    1.70    1.90
 -16 -20  12    1.10    1.80
 -16  20 -12    0.00    1.30
  16 -20  12   -1.20    1.30
  16 -20  12   -0.30    1.60
  16  20 -12   -0.50    1.70
 -16  18 -10   -1.70    1.00
 -16 -18  10   -1.10    1.60
  16  18 -10   -1.70    1.40
  16 -18  10    0.20    1.30
  16 -18  10    1.00    1.30
  16 -18  10    1.50    1.60
 -16 -16   8    0.70    1.60
 -16  16  -8    5.50    1.70
  16  16  -8    4.20    1.80
  16 -16   8    4.30    1.60
  16 -16   8    1.20    1.30
  16 -16   8    3.60    1.70
 -16 -14   6    7.90    2.20
 -16  14  -6    7.70    1.70
  16 -14   6   10.20    2.10
  16 -14   6   11.60    2.00
  16 -14   6   13.20    1.90
  16  14  -6    9.80    2.10
 -16  12  -4    2.20    1.20
 -16 -12   4    0.60    1.40
  16 -12   4    1.30    1.20
  16 -12   4    1.10    1.10
  16 -12   4    2.40    1.40
  16  12  -4    3.30    1.50
 -16  10  -2    7.80    1.60
 -16 -10   2    3.00    1.60
  16 -10   2    6.30    1.40
  16 -10   2    8.30    1.60
  16 -10   2    7.40    1.80
  16  10  -2    8.20    1.80
 -16  -8   0  191.38    7.80
  16   8   0  198.98    7.70
  16  -8   0  189.98    7.30
  16  -8   0  190.08    7.60
  16  -8   0  187.18    7.10
 -16  -6  -2    0.70    1.10
  16   6   2    0.40    1.10
  16   6   2    0.60    1.00
  16  -6  -2    0.30    0.80
  16  -6  -2    0.70    0.80
 -16  -4  -4    0.10    0.90
 -16   4   4   -1.30    0.70
  16   4   4   -0.50    0.90
  16  -4  -4   -0.50    0.60
  16   4   4    0.70    1.20
  16  -4  -4    0.70    0.90
 -16  -2  -6   48.00    2.90
 -16   2   6   52.09    3.10
  16  -2  -6   48.10    2.60
  16   2   6   48.70    3.30
  16   2   6   46.40    3.10
  16  -2  -6   52.09    2.90
 -16   0   8   -0.30    1.00
 -16   0  -8    0.20    0.80
  16   0  -8   -0.20    0.60
  16   0   8   -1.20    0.90
  16   0   8    0.20    1.00
  16   0  -8    0.20    0.80
  16   0  -8    1.20    0.90
 -16  -2  10    1.80    1.20
  16  -2  10    4.70    1.50
  16   2 -10    3.50    1.10
  16   2 -10    5.40    1.20
  16  -2  10    4.70    1.40
 -16  -4  12   -0.30    1.20
  16   4 -12    1.70    1.00
  16   4 -12    0.80    0.90
  16  -4  12    2.00    1.20
  16  -4  12    0.40    1.00
 -16  -6  14    4.70    1.80
  16  -6  14    6.90    1.70
  16   6 -14    5.70    1.30
  16  -6  14    4.80    1.50
  16   6 -14    4.40    1.40
 -16   8 -16    1.50    1.20
 -16  -8  16   -0.10    1.40
  16  -8  16    0.70    1.20
  16  -8  16    0.80    1.30
  16   8 -16    0.20    1.00
 -16  10 -18    5.60    1.60
 -16 -10  18    5.10    2.00
  16  10 -18    2.40    1.20
  16 -10  18    5.20    1.80
  16 -10  18    9.60    2.00
 -16 -12  20    8.90    2.30
 -16  12 -20    7.40    2.00
  16  12 -20    7.80    1.70
  16 -12  20   13.90    2.50
  16 -12  20   11.50    2.30
 -16  14 -22   24.20    3.10
 -16 -14  22   29.20    3.70
  16  14 -22   29.80    3.00
  16 -14  22   24.30    3.10
  16 -14  22   25.60    3.20
 -16  16 -24    1.10    1.60
 -16 -16  24    1.80    2.20
  16 -16  24    1.10    1.80
  16  16 -24    2.50    1.50
  16 -16  24    1.00    1.60
 -17  21 -13    0.80    1.30
 -17 -21  13    1.70    2.00
  17  21 -13    1.00    1.80
  17 -21  13    1.20    1.80
 -17 -19  11   -0.10    1.80
 -17  19 -11   -2.20    1.10
  17 -19  11   -1.80    1.50
  17  19 -11   -0.40    1.50
 -17  17  -9   -1.60    1.10
 -17 -17   9   -0.90    1.60
  17  17  -9   -0.50    1.50
  17 -17   9   -0.90    1.40
  17 -17   9    1.30    1.50
 -17 -15   7   -0.20    1.60
 -17  15  -7    1.60    1.20
  17 -15   7   -2.20    1.00
  17  15  -7   -0.10    1.40
  17 -15   7   -0.90    1.30
 -17  13  -5    2.40    1.30
 -17 -13   5   -0.80    1.60
  17 -13   5    0.40    1.20
  17  13  -5    1.60    1.50
  17 -13   5    2.20    1.30
 -17 -11   3    4.00    1.80
 -17  11  -3    5.60    1.50
  17  11  -3    2.10    1.50
  17 -11   3    4.90    1.60
  17 -11   3    4.10    1.30
 -17  -9   1    2.70    1.60
  17  -9   1    4.40    1.30
  17   9  -1    5.70    1.70
  17  -9   1    5.30    1.60
 -17  -7  -1   10.00    1.90
  17  -7  -1   11.80    2.00
  17  -7  -1    5.50    1.30
  17   7   1    8.40    1.70
  17   7   1   10.30    2.00
 -17   5   3    0.80    1.00
 -17  -5  -3    1.20    1.10
  17   5   3    0.90    1.30
  17   5   3    0.40    0.90
  17  -5  -3    0.50    0.90
 -17  -3  -5    1.20    1.10
 -17   3   5   -0.20    0.90
  17   3   5    1.90    1.40
  17  -3  -5    0.00    0.90
  17   3   5   -0.90    0.90
 -17  -1  -7    2.00    1.10
 -17   1   7    2.90    1.30
  17   1   7    2.90    1.30
  17  -1  -7    3.10    1.20
  17   1   7    2.60    1.20
 -17   1  -9    1.20    1.20
 -17  -1   9    2.20    1.40
  17  -1   9    3.90    1.40
  17  -1   9   -1.20    0.90
  17   1  -9    1.50    0.90
 -17  -3  11   -1.80    1.10
  17  -3  11   -1.50    1.00
  17  -3  11    0.20    1.10
  17   3 -11   -0.20    1.00
 -17  -5  13   -0.20    1.40
  17  -5  13   -0.10    1.10
  17  -5  13    1.00    1.10
 -17  -7  15    4.60    1.90
  17  -7  15    4.40    1.70
  17  -7  15    5.20    1.70
 -17   9 -17    8.00    1.90
 -17  -9  17    6.00    2.20
  17  -9  17    7.50    1.90
  17  -9  17    6.80    1.80
 -17  11 -19    0.40    1.40
 -17 -11  19   -1.90    1.60
  17 -11  19   -2.10    1.10
  17 -11  19   -0.10    1.30
 -17  13 -21   18.80    2.70
 -17 -13  21   15.50    3.00
  17 -13  21   11.40    2.30
  17 -13  21   17.00    2.90
 -17  15 -23    9.80    2.30
 -17 -15  23   14.20    3.00
  17 -15  23    5.10    1.90
  17 -15  23    7.40    2.30
 -18  20 -12    1.80    1.50
 -18 -20  12    1.30    1.90
  18 -20  12    2.20    1.90
  18  20 -12    0.30    1.80
[truncated: 1,004,534 more chars]
